# Supplementary material for: Linking the Wrangellia flood basalts to the Galápagos hotspot
Source: Sci Rep. 2021 Apr 21;11:8579. doi: 10.1038/s41598-021-88098-7 (PMC8060428; doi:10.1038/s41598-021-88098-7)
Supplement: Supplementary file 1 — Supplementary Tables. [file 41598_2021_88098_MOESM1_ESM.xlsx]

## Sheet: Table S1
Sample	Type	Location	SiO2 (wt%)	TiO2	Al2O3	Fe2O3T	Fe2O3	FeOT	FeO	MnO	MgO	CaO	Na2O	K2O	P2O5	LOI	Mg#	Sc (ppm)	V	Cr	Ni	Co	Cu	Zn	Ga	Rb	Sr	Y	Zr	Nb	Cs	Ba	La	Ce	Pr	Nd	Sm	Eu	Gd	Tb	Dy	Ho	Er	Tm	Yb	Lu	Hf	Ta	Th
samp. 83BF1	high-Ti	Wrangellia	50.3	2.08	14.5	13.5212	3.1	12.1664	9.38	0.18	6.47	12	2.05	0.33	0.19		48.6644	40		232	91	45	310			10	230	31	129	15		101	8.7	21.6		15.9	4.1	1.6	4.5	0.7	4.9			0.4	2.2	0.33	3	0.65	0.77
samp. 83BF3	high-Ti	Wrangellia	47.3	1.06	16.8	13.7611	2.44	12.3822	10.19	0.18	9.44	9.32	2.9	0.23	0.1		57.6093	37		382	345	73	230			9	305	27	71	8		35	1.7	4.3		4.7	1.9	0.8	2.8	0.5	3.6			0.4	2.3	0.34	1.3	0.11	0.15
samp. 83BF4	high-Ti	Wrangellia	49.3	1.83	15	13.3645	3.01	12.0254	9.32	0.22	7.02	10.8	3.37	0.05	0.17		50.995	44		163	86	47	291			0	178	24	105	11		51	7.3	17.4		11.4	3.5	1.3	3.8	0.7	4.4			0.4	2.3	0.33	2.4	0.56	0.6
samp. 83BF5	high-Ti	Wrangellia	48.4	1.17	17	10.567	2.99	9.5082	6.82	0.18	9.6	11.3	2.2	0.29	0.09		64.2831	36		497	182	48	155			6	303	19	72	7		125	3.8	9.9		6.8	2.2	0.9	2.8	0.4	2.6			0.2	1.5	0.22	1.5	0.3	0.23
samp. 83BF6	high-Ti	Wrangellia	50.8	2.07	15.4	13.3278	2.44	11.9924	9.8	0.19	5.89	11.5	2.38	0.26	0.18		46.6811	41		165	64	43	295			0	256	25	117	13		93	8.5	18.4		13.3	3.8	1.5	4.4	0.7	4.5			0.4	2.6	0.36	2.8	0.57	0.82
samp. 83BF8	high-Ti	Wrangellia	46.4	1.09	16.8	14.4177	2.13	12.973	11.06	0.19	10.3	9.08	2.55	0.3	0.11		58.5971	38		339	296	66	214			11	167	25	72	9		21	2.6	6		5.1	2	0.9	2.8	0.5	3.7			0.4	2.6	0.37	1.6	0.14	0.28
samp. 83BF9	high-Ti	Wrangellia	49	2.56	13.4	16.2332	3.79	14.6066	11.2	0.39	6.59	8.84	3.55	0.38	0.23		44.575	47		120	77	52	1122			8	320	33	151	14		210	10.3	22.7		15.2	4.4	1.8	5.7	1	6.1			0.5	3.2	0.45	3.3	0.72	0.94
samp. 83BF13	high-Ti	Wrangellia	50.3	2.06	14.1	13.7967	2.82	12.4143	9.88	0.2	6.51	11.6	2.1	0.24	0.18		48.3146	41		109	71	46	308			7	225	28	126	14		121	9	20.2		14	4.1	1.6	5.1	0.8	4.8			0.4	2.5	0.37	2.8	0.6	0.92
samp. 83BF14	high-Ti	Wrangellia	49.2	2.43	14.6	13.8178	2.83	12.4332	9.89	0.19	6.19	12.1	2.11	0.25	0.23		47.0191	40		238	88	43	327			9	270	32	152	16		67	11.9	26		17.1	5	1.8	6.1	0.9	5.4			0.4	2.6	0.38	3.3	0.83	1.05
samp. 83BF15	high-Ti	Wrangellia	49.2	1.81	14.5	13.7245	3.57	12.3493	9.14	0.2	6.55	12.8	1.91	0.13	0.16		48.5985	44		168	89	48	279			3	197	25	108	12		32	7.6	16.6		12	3.7	1.4	4.5	0.7	4.5			0.4	2.4	0.36	2.5	0.53	0.71
samp. 83BF16	high-Ti	Wrangellia	50.1	1.48	13.3	12.1447	3.29	10.9278	7.97	0.2	8.39	11.8	3.21	0.08	0.12		57.7812	48		375	116	49	248			5	226	23	94	12		32	6.4	13		8.2	2.9	1.1	3.6	0.7	4			0.4	2.1	0.29	2.1	0.43	0.54
samp. 83BF17	high-Ti	Wrangellia	49.7	1.95	14.2	15.23	4.22	13.704	9.91	0.25	7.35	9.23	3.22	0.88	0.17		48.8772	45		123	78	52	202			23	601	27	116	13		532	7.7	16.8		11.9	3.8	1.5	4.5	0.7	4.5			0.5	2.6	0.39	2.4	0.55	0.7
samp. 91KB1	high-Ti	Wrangellia	47.48	1.21	16.03	10.2434		9.22		0.17	8.99	10.71	2.92	0.06	0.13	3.2	63.4785				171		68	69	20	1	198	19	74	6.7		39	5.3	14.5		9.4	2.6	1.3	3.4	0.6		0.7	1.8	0.3	1.5	0.31	2.08		0.44
samp. 91KB3	high-Ti	Wrangellia	49	1.53	14.59	11.51		10.36		0.15	7.82	10.59	3.31	0.09	0.15	2	57.3659				121		125	74	18	1.14	239	25	91	7.6		39	6.3	17.7		11.2	3.3	1.3	4.6	0.8		0.9	2.3	0.33	2.1	0.32	3		0.62
samp. 91KB4	high-Ti	Wrangellia	47.62	1.37	20.37	9.27685		8.35		0.14	5.8	9.87	3.65	0.58	0.16	2.52	55.3213				98		80	74	26	7	620	19	72	6.7		177	5.5	15.8		10	2.6	1.1	3.9	0.6		0.6	1.7	0.24	1.6	0.24	1.5		0.33
samp. 91KB6	high-Ti	Wrangellia	48.03	1.73	13.88	12.6654		11.4		0.21	8.49	11.19	2.47	0.09	0.18	2.06	57.0365				182		63	89	20	4	184	24	97	6.9		36	7	19.9		12.2	3.4	1.4	4.7	0.8		0.9	2.4	0.34	2.1	0.32	2.6		0.56
samp. 91KB7	high-Ti	Wrangellia	48.02	1.53	13.52	12.2432		11.02		0.15	8.55	10.91	3.38	0.11	0.17	2.3	58.0368				162		54	91	17	3	279	26	87	8.1		43	6.2	17.9		10.8	3.1	1.3	4.5	0.8		0.8	2.2	0.32	1.9	0.3	2.35		0.5
samp. 91KB8	high-Ti	Wrangellia	48.08	1.87	15.77	12.4321		11.19		0.18	5.73	9.88	3.49	0.49	0.19	1.4	47.7205				82		114	88	22	8	293	23	99	12.1		89	7.9	21		13.2	3.3	1.4	4.8	0.8		0.9	2.3	0.32	2.1	0.32	2.69		0.6
samp. 91KB9	high-Ti	Wrangellia	45.82	2.64	14.67	13.5875		12.23		0.22	6.49	11.34	2.47	0.32	0.31	2.26	48.6112				143		477	153	19	8	332	33	173	16.3		143	13	35.3		21.6	5.3	2	7	1.1		1.3	3.1	0.46	2.9	0.48	6.26		1.57
samp. 91KB10	low-Ti	Wrangellia	51.92	0.83	19.93	8.82134		7.94		0.15	3.43	9.33	3.49	0.29	0.18	1.37	43.5047						67	83	20	3	722	23	59	3.9						12	3.26
samp. 91KB13	high-Ti	Wrangellia	48.97	1.74	13.57	13.3987		12.06		0.21	6.22	11.27	2.95	0.17	0.18	1.16	47.8997				64		83	94	21	3	264	25	103	9.2		85	8.1	22.2		13.2	3.6	1.5	5.3	0.8		0.9	2.5	0.4	2.3	0.36	2.51		0.6
samp. 91KB15	high-Ti	Wrangellia	48.51	1.95	13.93	12.621		11.36		0.2	7.43	9.15	4	0.12	0.21	2.61	53.8298				121		307	99	17	4	356	28	110	10.6		56	7.8	22		14	3.9	1.5	5.7	0.9		1	2.7	0.39	2.4	0.36	3.22		0.61
samp. 91KB17	high-Ti	Wrangellia	48.91	1.89	12.94	12.8987		11.61		0.2	6.49	9.58	3.81	0.02	0.19	2.77	49.9115				65		203	98	18	2	100	28	109	11.9		15	9.6	25.5		15.4	4	1.6	5.7	1		1.1	3	0.42	2.7	0.38	3.2		0.87
samp. 91KB19	high-Ti	Wrangellia	50.38	1.76	13.02	11.9655		10.77		0.19	6.98	11.07	2.73	0.09	0.18	2.05	53.6024				107		169	89	19	1.37	214	26	106	9.6		65	8.8	22.2		14	3.7	1.5	5.1	0.9		1.1	2.8	0.36	2.5	0.38	3.04		0.74
samp. 91KB22	high-Ti	Wrangellia	51.32	2.06	12.55	13.3653		12.03		0.17	4.97	8.75	3.59	0.71	0.24	2.18	42.4111				43		117	66	22	15	277	35	135	11.1						18.6	5.02
samp. 91KB23	high-Ti	Wrangellia	52.41	2.18	12.68	14.543		13.09		0.2	5.04	8.53	3.23	0.53	0.26	1.3	40.7				40		254	151	22	11	227	34	144	11.8		296	12.9	33.2		20.4	5.3	2	7.6	1.3		1.4	4	0.55	3.6	0.54	4.2		1.89
samp. 91KB24	high-Ti	Wrangellia	51.85	2.04	12.97	13.7542		12.38		0.2	5.6	9.38	3.1	0.35	0.21	1.94	44.6394				50		165	111	22	7	230	33	132	11.7		239	12	31.2		18.4	4.8	1.8	6.9	1.1		1.2	3.5	0.5	3.1	0.47	4.07		1.81
samp. 91KB25	high-Ti	Wrangellia	51.65	2.13	12.59	14.2986		12.87		0.2	4.67	8.7	2.81	0.53	0.27	1.91	39.2772				46		193	111	22	9	233	36	147	10.3		278	13.5	34.5		20.3	4.8	1.8	6.7	1.2		1.2	3.2	0.41	2.9	0.41	2.44		1.38
samp. 91KB26	high-Ti	Wrangellia	51.36	2.32	12.15	14.7319		13.26		0.2	4.66	8.94	2.65	0.59	0.25	2.49	38.5167				49		175	112	21	12	230	36	144	11.2		254	13.9	33.9		22.2	5.7	2.1	7.9	1.4		1.6	4.3	0.6	4.3	0.63	4.53		2.23
samp. 91KB28	high-Ti	Wrangellia	48.86	1.5	14.48	11.51		10.36		0.18	7.41	11.27	3.07	0.59	0.19	2.17	56.0438				106		149	96	21	14	267	21	89	7.5		436	6.8	18.7		11.4	2.8	1.2	4.1	0.7		0.7	1.8	0.29	1.8	0.28	2.37		0.64
samp. 91KB30	high-Ti	Wrangellia	49.55	1.52	15.39	10.9878		9.89		0.16	7.25	11.84	3.14	0.17	0.16	1.12	56.6489				118		147	78	21	2	260	25	92	7.7		86	7.4	19.8		12.2	3.1	1.3	4.2	0.7		0.8	2	0.28	1.8	0.27	2.66		0.66
samp. 91KB31	high-Ti	Wrangellia	50.08	2.14	13.03	13.2209		11.9		0.2	6.5	10.64	3.08	0.2	0.21	1.18	49.3332				65		216	104	24	5	231	32	126	9.9		98	10.1	27.3		16.2	4.3	1.6	5.8	1		1.1	2.8	0.4	2.3	0.36	2.02		1
samp. 91KB32	low-Ti	Wrangellia	51.42	1	13.9	11.7877		10.61		0.19	6.46	11.3	2.52	0.1	0.15	1.29	52.0462				66		155	100	19	3	194	23	56	3.7		127	3.9	10.1		6.2	1.8	0.9	3	0.6		0.7	2.1	0.29	2	0.3	1.57		0.79
samp. 91KB34	high-Ti	Wrangellia	50.58	1.81	14.46	12.0543		10.85		0.18	5.83	10.09	2.83	0.73	0.18	1	48.923				66		192	97	23	12	250	28	112	9.2		248	8.8	22.6		14.2	3.5	1.5	4.7	0.8		0.9	2.3	0.35	2.1	0.32	3.29		0.95
samp. 91KB35	high-Ti	Wrangellia	49.54	2	13.62	12.4765		11.23		0.18	6.5	10.89	3.24	0.39	0.24	1.91	50.7819				88		204	93	22	11	264	29	121	11.8		267	9.6	26.2		15.4	4.1	1.7	5.9	1		1	2.7	0.39	2.3	0.32	3.93		1.12
samp. 91KB37	high-Ti	Wrangellia	49	2.01	13.13	13.1209		11.81		0.18	6.28	11.3	2.79	0.27	0.2	1.21	48.6625				79		217	103	21	5	214	28	118	10.9		435	8.7	23.6		14.6	3.9	1.6	5.6	0.9		1	2.7	0.37	2.4	0.35	3.46		0.92
samp. 91KB39	high-Ti	Wrangellia	49.74	1.96	13.23	12.5876		11.33		0.18	6.77	11.33	2.21	0.33	0.19	1.24	51.5772				101		210	97	22	7	232	28	121	12		259	11	26.7		17.8	4.6	1.8	6.2	1		1.3	3.4	0.47	3.2	0.47	3.65		1.05
samp. 91KB40	high-Ti	Wrangellia	49.19	1.93	13.74	12.8654		11.58		0.17	6.38	11.17	3.09	0.33	0.22	1.24	49.5488				75		346	106	21	11	238	28	118	11.3		196	11.2	25.2		15.2	4.1	1.6	5.7	0.9		1	2.6	0.37	2.4	0.34	3.66		1.08
samp. 91KB44	high-Ti	Wrangellia	49.97	1.54	13.95	11.3655		10.23		0.16	5.77	10.75	1.71	0.81	0.14	4.9	50.1353				56		160	86	16	16	138	24	92	8.9		189	7.8	19.6		12.9	3.2	1.5	4.4	0.8		0.9	2.4	0.33	2.3	0.33	2.62		0.75
samp. 91KB48	high-Ti	Wrangellia	47.67	1.59	13.67	12.2099		10.99		0.19	7.28	10.34	3.95	0.19	0.15	3.47	54.1457				89		83	90	22	4	135	26	95	9.7		90	7.2	20.1		11.8	3.3	1.3	4.5	0.7		0.8	2.3	0.34	2.1	0.33	2.95		0.73
samp. 91KB49	high-Ti	Wrangellia	50.15	1.3	14.24	11.7877		10.61		0.18	7.58	12.23	2.93	0.09	0.1	0.62	56.0152				94		98	78	16	1	221	21	78	7.3		53	6.1	16.3		10.2	2.9	1.3	4.2	0.7		0.8	2.2	0.34	1.9	0.31	2.99		0.42
samp. 92NG3	high-Ti	Wrangellia	48.81	1.51	16.6	10.3767		9.34		0.14	5.87	9.61	4.16	0.24	0.16	3.76	52.8372				71		40	88	23	5	274	24	83	6.6						10.4	3.1
samp. 92NG6	high-Ti	Wrangellia	48.8	2.52	12.47	14.443		13		0.17	6.1	9.53	2.54	0.59	0.28	2.06	45.5469				63		183	117	24	10	227	32	156	13.1		208	14.1	34.8		21.9	5.5	2.2	7.5	1.2		1.5	3.9	0.48	3.5	0.5	4.25		1.64
samp. 92NG13	high-Ti	Wrangellia	47.88	1.68	16.39	11.7988		10.62		0.17	5.76	10.15	4.21	0.35	0.13	3.86	49.1566				70		48	73	21	4	213	24	92	7.9		128	6.4	17.3		11.3	2.9	1.3	4.2	0.7		0.8	2.4	0.3	2.2	0.33
samp. 92NG21	high-Ti	Wrangellia	48.75	2.29	11.42	14.0541		12.65		0.17	5.3	11.93	2.44	0.02	0.26	3.52	42.7542				63		226	62	21	2	24	33	145	12.1		14	11.6	29.5		17.9	4.7	1.9	6.5	1.2		1.3	3.4	0.55	2.9	0.57	4.09		1.03
samp. 92NG25	high-Ti	Wrangellia	48.74	1.75	14.6	11.5322		10.38		0.22	7.08	8.51	4.4	0.65	0.16	3.44	54.8709				97		23	107	18	9	419	26	105	10.6		456	9	23.3		14.5	3.6	1.5	5	0.8		1	2.7	0.39	2.7	0.41	3.06		0.87
samp. 92NG37	high-Ti	Wrangellia	49.28	1.83	14.43	12.3432		11.11		0.21	6.46	8.87	4.11	0.86	0.21	2.42	50.8961				71		128	130	19	19	324	25	109	8.7		151	9.7	24.9		14.6	3.7	1.5	5.1	0.9		1	2.4	0.34	2.3	0.37	4.14		1.38
samp. 92NG41	high-Ti	Wrangellia	48.93	1.62	12.87	13.8097		12.43		0.18	6.66	10.48	2.88	0.22	0.17	2.28	48.8519				61		82	89	17	3	169	27	101	8.4		65	7.2	19.6		12.2	3.2	1.4	4.6	0.8		1	2.6	0.42	2.5	0.45	2.1		0.65
samp. 92NG46	high-Ti	Wrangellia	48.78	1.91	14	12.8098		11.53		0.17	6.8	9.66	4.62	0.3	0.22	2.55	51.2506				86		40	86	22	9	325	27	114	11.2		99	10.1	27.1		16.4	4.2	1.7	5.5	0.9		1	2.6	0.35	2.5	0.35	3.53		0.91
samp. 92NG48	high-Ti	Wrangellia	48.69	1.42	13.98	11.4766		10.33		0.17	6.92	11.16	3.21	0.28	0.18	2.51	54.4241				91		57	86	20	9	283	22	85	8.1		74	6.7	18.4		11.2	2.9	1.3	4.2	0.7		0.8	2.3	0.31	2.2	0.33	2.8		0.73
samp. 92SC1	low-Ti	Wrangellia	49.15	0.67	20.57	9.17686		8.26		0.12	4.03	5.86	4.85	1.91	0.1	5.06	46.5158				14		19	79	17	58	581	11	31	3.2		391	4.6	14		6.2	1.2	0.6	1.8	0.3		0.3	0.9	0.13	0.9	0.15	1.02		0.65
samp. 08	high-Ti	Wrangellia	45.91	2.47	17.04	11.5235	2.48	10.3689	8.14	0.2	9.3	9.19	1.79	2.83	0.65		61.5211	31		356	168	43	50			51	690	24	215	32		685	31.4	70.8		32.5	7.3	2.2	6.5	0.86					2.3	0.33	4.6	2.5	2.6
samp. 09	high-Ti	Wrangellia	48.35	2.15	14.92	10.8915	3.37	9.80014	6.77	0.15	11.74	7.32	2.53	2.14	0.56		68.1064	31		669	309	49	1			38	560	19	190	29		1.23	25.5	54.5		25.5	6	1.8	5.9	0.76				0.33	2	0.29	3.9	2	2.1
samp. 14	high-Ti	Wrangellia	44.52	2.52	15.61	12.0392	4.34	10.8329	6.93	0.18	11.21	11	2	0.91	0.79		64.8461	32		650	375	52	41			23	551	28	223	47		402	38.5	81.5		36.1	7.6	2.2	6.6	0.88				0.36	2.2	0.33	4.5	2.7	3.2
samp. 11	high-Ti	Wrangellia	49.25	1.38	14.99	11.6302	2.02	10.4648	8.65	0.18	7.84	13.26	2.13	0.17	0.13		57.1821	41		428	122	44	134			1	193	19	77	5		102	5.8	16.1		11.1	3.3	1.1	3.8	0.58				0.31	1.9	0.28	2	0.51	0.52
samp. 13	high-Ti	Wrangellia	51	1.62	17.92	9.73379	3.19	8.75846	5.89	0.13	4.27	13.01	2.56	0.24	0.17		46.4972	27		129	54	24	171			14	332	25	99	15		235	7.6	19.5		12.6	3.6	1.2	4.1	0.6				0.31	2	0.29	2.4	0.63	0.63
samp. 06	high-Ti	Wrangellia	44.1	2.09	15.1	11.8	0.69	10.6176	10	0.18	4.52	8.56	3.33	0.87	0.22		43.1449	32		73	61	32	165			21	373	29	123	16		3000	10.3	26.7		17.3	4.9	1.5	5.5	0.81				0.42	2.7	0.4	3.1	0.85	0.85
samp. 692	high-Ti	Wrangellia	50.47	1.91	16.11	11.7869	3.41	10.6059	7.54	0.17	6.3	9.51	4.22	0.18	0.17		51.4297	35		285	99	41	67			1	108	26	104	10		27	6.5	18.6		13.1	4	1.4	4.7	0.76				0.4	2.5	0.37	2.7	0.55	0.47
samp. 706	high-Ti	Wrangellia	49.35	2.07	15.34	14.5169	5.84	13.0623	7.81	0.16	6.91	7.9	4.22	0.22	0.19		48.533	41		156	64	43	58			2	77	29	115	13		20	7.3	20.6		14.3	4.4	1.4	5.4	0.84				0.45	2.8	0.42	2.9	0.64	0.52
samp. 1	high-Ti	Wrangellia	49.9	1.53	14.1	13.4458	4.38	12.0985	8.16	0.2	6.61	9.24	2.74	0.43	0.21		49.3392	42.6	353	125	86.5	43.7	140	101		11.8	137	25	91	8.3	0.35	106	6.4	16.1		11.2	3.57	1.26	3.56	0.843				0.465	3.39	0.498	2.53	0.452	0.673
samp. 7	high-Ti	Wrangellia	47.3	1.3	14.6	11.3349	4.48	10.1991	6.17	0.16	8.89	10.8	2.3	0.55	0.15		60.8423	38.7	293	355	111	43.3	58	110		15.6	220	14	78	10	0.48	208	6.2	15.6		10.9	3.24	1.09		0.579					1.97	0.29	1.91	0.393	0.564
samp. 79AH213	high-Ti	Wrangellia	50.7	2.7	13.7	15.1322	3.8	13.616	10.2	0.26	6.1	9.2	2.7	0.71	0.28		44.4013	45		130	100					18	152	38	168	20		113	13	30			5.9	1.7		1.1					3.8	0.55	4.2	1.1	1.1
samp. 79AH214	high-Ti	Wrangellia	49.7	1.9	12.7	14.099	4.1	12.6863	9	0.18	7.3	10	2.8	0.5	0.19		50.6354	56		220	150					16	154	29	111	12		122	8	18			3.9	1.2		0.8					2.8	0.52	2.6	0.7	0.6
samp. 79AH215	high-Ti	Wrangellia	49.5	2.1	14.1	14.6656	4	13.1961	9.6	0.2	6.3	10.3	1.9	0.94	0.2		45.976	47		160	120					30	144	33	121	12		104	8	19			4.4	1.3		0.9					3.2	0.56	2.9	0.7	0.6
samp. 79AH216	high-Ti	Wrangellia	50	1.6	14.6	12.1547	3.6	10.9368	7.7	0.19	6.7	12.1	1.8	0.5	0.15		52.1995	44		160	96					12	173	25	91	8		59	6	15			3.6	1.1		0.7					2.7	0.44	2.3	0.5	0.4
samp. 79AH217	high-Ti	Wrangellia	49.7	2.1	13.7	14.0546	4.5	12.6463	8.6	0.21	6.3	11.2	2	0.66	0.2		47.0346	55		140	130					21	161	31	122	10		107	7	18			4.2	1.4		0.9					3.1	0.5	3	0.6	0.6
samp. 79AH218A	high-Ti	Wrangellia	49.7	2.2	14	13.0768	3.3	11.7665	8.8	0.16	6.2	10.8	1.9	0.77	0.21		48.4344	58		220	140					21	134	32	127	9		28	8	21			5.2	1.4		1.1					3.3	0.56	3.3	0.6	0.6
samp. 79AH218B	high-Ti	Wrangellia	48.3	2.1	14.8	12.4547	3.9	11.2067	7.7	0.16	6.4	11.3	2.4	0.07	0.18		50.4461	46		180	140					5	238	28	115	9		28	7	17			4	1.2		0.8					3	0.53	2.7	0.6	0.5
samp. 63AMK147	high-Ti	Wrangellia	48.3	1.7	15	12.4881	4.6	11.2368	7.1	0.11	6.3	10.2	2.91	0.5	0.16		49.9855																8	19			4.1	1.6		0.8					2.5	0.41
samp. 64AMK203	high-Ti	Wrangellia	48.6	3.1	13.2	15.0435	5.6	13.5361	8.5	0.22	5.8	9.3	2.46	0.44	0.28		43.3044																10	22			4.6	1.8		0.9					3.9	0.51
samp. 64AMK211	high-Ti	Wrangellia	45.7	1.4	15.2	11.8992	3.9	10.7069	7.2	0.2	7.7	9.8	2.72	0.56	0.16		56.1781																6	17			3.6	1.3		0.7					2.2	0.35
samp. 69AMK93D	high-Ti	Wrangellia	48.9	2.2	12.9	13.7211	2.5	12.3462	10.1	0.26	6.9	8.1	3.72	0.23	0.24		49.9058																9	21			4.4	1.7		1.1					0.5	0.75
samp. 67ARH246	low-Ti	Wrangellia	48.8	0.7	14.6	11.2548	3.7	10.1271	6.8	0.18	8.8	7.6	3.43	0.42	0.13		60.7688																3	6			1.7	0.8		0.5					1.9	0.24
samp. 67ARH247	high-Ti	Wrangellia	49.7	1.3	15.8	12.5881	4.7	11.3268	7.1	0.16	6.1	5.2	3.59	0.96	0.18		48.9797																7	17			3.6	1.2		0.8					3	0.47
samp. 68AMK67	low-Ti	Wrangellia	48.3	0.68	14.8	12.5101	2.4	11.2566	9.1	0.21	8.1	10	1.26	0.12	0.13		56.1924																6	13			2	0.8		0.6					2.2	0.43
samp. 68AMN165	high-Ti	Wrangellia	48.1	2.3	14	15.066	8.4	13.5564	6	0.15	6.2	8.1	3.67	0.16	0.28		44.9115																13	30			5.7	2.1		1.1					3.9	0.54
samp. 68GK320	low-Ti	Wrangellia	49	0.72	16.6	10.8104	3.7	9.7272	6.4	0.17	7	9.3	2.96	0.51	0.14		56.1942																4	8			1.8	0.6		0.4					1.8	0.31
samp. 79BS66	high-Ti	Wrangellia	47.4	1.45	15.7	12.3303	3.72	11.0948	7.75	0.15	7.01	9.62	2.93	1.1	0.12		52.9697	49		260	140					29	684	21	97	6		236	6	14			2.8	1		0.7					2.2	0.32	2.1	0.4	0.6
samp. 79BS65E	high-Ti	Wrangellia	46.7	2.09	14	13.997	6.32	12.5945	6.91	0.1	8.58	6.98	2.48	0.65	0.18		54.8407	50		180	110					13	173	34	128	14		78	9	21			4.4	1.4		0.9					2.9	0.44	3	0.6	0.9
samp. 79BS65B	high-Ti	Wrangellia	47.9	1.91	14.4	12.6913	3.87	11.4197	7.94	0.21	7.5	9.88	2.3	0.37	0.16		53.9326	55		120	100					5	27	27	116	9		74	8	18			4	1.3		0.8					2.8	0.43	2.9	0.6	0.7
samp. 79BS79A	high-Ti	Wrangellia	46	1.41	14.4	11.5015	4.08	10.349	6.68	0.16	6.17	12.4	3.08	0.06	0.12		51.5213	55		220	140					5	183	22	90	8		45	9	16			2.9	1		0.7					2	0.32	2.1	0.6	0.6
samp. 79BS81A	high-Ti	Wrangellia	47.6	1.37	15.9	10.5957	1.43	9.53406	8.25	0.15	7.08	9.25	3.16	1.03	0.12		56.9661	38		190	100					31	843	22	103	7		192	6	14			2.8	1		0.6					2	0.3	2.1	0.4	0.2
samp. NUGGET	high-Ti	Wrangellia	46.42	2.17	13.65	13.0513	4.03	11.7436	8.12	0.22	5.78	9.3	4.12	0.06	0.21		46.7337	53		160	120					5	112	33	134	15		15	10	25			4.5	1.6		1					3	0.51	3.2	0.6	1
samp. SWAN	high-Ti	Wrangellia	46.79	1.77	15.1	12.3094	5.91	11.076	5.76	0.15	7.26	11.69	2.77	0.52	0.05		53.8838	52		210	160					8	263	25	99	10		81	6	14			3.2	1.2		0.7					2.4	0.39	2.4	0.5	0.4
samp. 5707A3	high-Ti	Wrangellia	49.74	1.96	13.37	14.05		12.6422		0.27	6.69	10.61	2.64	0.29	0.16	1.68	48.5414		362	165	75			121	19	3.4	237	28.1	113	10.1		79	6	21
samp. 5708A2	high-Ti	Wrangellia	48.4	2.36	13.49	16.14		14.5228		0.27	5.89	10.09	2.47	0.61	0.23	1.41	41.9604	44.06	411	62	57	47	19	176	20	9.7	162	36.1	148	12.5	0.08	108	7	27	3.66	18.83	5.22	1.73	5.57	1.02	6.84	1.35	4.02	0.51	3.58	0.53	4.1	0.74	0.98
samp. 5710A2	high-Ti	Wrangellia	48.81	2.4	15.21	12.94		11.6434		0.23	6.85	9.16	3.15	0.58	0.21	2.37	51.1891		349	167	89			126	21	6.1	263	31.6	145	12.2		147	8	24
samp. 5710A3	high-Ti	Wrangellia	50.02	1.95	14.45	13.39		12.0483		0.18	6.56	8.56	3.56	1.03	0.18	2.47	49.2533		337	119	69			108	19	15	481	27.8	115	9.7		246	7	22
samp. 5712A2	high-Ti	Wrangellia	49.9	1.89	13.76	13.76		12.3812		0.24	6.74	11.35	1.87	0.22	0.16	1.28	49.2486	42.52	346	133	73	45	1067	113	19	2.2	184	25.8	110	9.9	0.14	70	6	21	2.9	14.73	4.19	1.43	4.17	0.77	5.04	0.99	2.85	0.33	2.37	0.36	3.15	0.67	0.72
samp. 5714A1	high-Ti	Wrangellia	49.31	1.66	15.58	13.21		11.8864		0.17	6.6	10.8	2.08	0.42	0.15	2.39	49.7435		329	156	82			109	19	5.2	334	26.2	99	7.7		63	6	16
samp. 5714A3	high-Ti	Wrangellia	50.21	1.6	16.01	10.99		9.8888		0.16	6.64	9.97	3.77	0.28	0.14	3.12	54.4822		276	282	81			88	17	2.6	394	22.6	93	7.3		56	4	13
samp. 5715A1 (1)	high-Ti	Wrangellia	49.61	1.69	15.56	13		11.6974		0.2	6.63	11.09	1.84	0.2	0.15	0.84	50.2575	41.17	354	165	85	44	126	110	20	1	184	26	98	7.7	0.28	55	6	17	2.35	12.2	3.51	1.25	3.8	0.72	4.77	0.98	2.86	0.36	2.59	0.4	2.78	0.48	0.64
samp. 5715A1 (2)	high-Ti	Wrangellia	49.41	1.68	15.75	12.97		11.6704		0.2	6.62	11.04	1.82	0.2	0.14	1.84	50.2776	41.17	352	167	85	44	126	111	19	1	184	26.2	98	7.7	0.28	56	6	16	2.35	12.2	3.51	1.25	3.8	0.72	4.77	0.98	2.86	0.36	2.59	0.4	2.78	0.48	0.64
samp. 5715A5	high-Ti	Wrangellia	50.25	1.14	16.69	10.39		9.34892		0.18	7.94	9.48	3.36	0.67	0.09	3.57	60.2218	38.5	249	460	116	39	64	68	15	8.5	437	18.3	60	4.4	0.83	129	2	8	1.49	7.68	2.32	0.9	2.55	0.5	3.34	0.69	1.98	0.25	1.77	0.28	1.79	0.3	0.34
samp. 5716A1	high-Ti	Wrangellia	50.89	1.66	15.82	12.03		10.8246		0.18	6.13	7.94	4.26	0.58	0.15	2.96	50.2359		289	157	66			94	15	5.8	321	26.4	98	7.6		115	4	16
samp. 5716A2	high-Ti	Wrangellia	50.52	2.12	13.56	14.22		12.7952		0.19	7.83	7.01	4.52	0.08	0.18	3.57	52.1726		393	133	61			97	17	0.6	56	30.8	120	9.7		14	4	18
samp. 5716A3	high-Ti	Wrangellia	50.76	1.96	15.57	13.37		12.0303		0.18	4.8	8.1	4.71	0.23	0.19	3.54	41.5627		319	70	47			82	21	2	97	28.5	118	10.2		47	7	18
samp. 5719A1	low-Ti	Wrangellia	55.72	0.67	18.59	7.84		7.05443		0.16	3.37	6.07	5.14	2.18	0.38	5.14	45.9916	11.02	170	0	1	16	25	83	17	25.4	158	19.5	81	6.3	0.06	1277	17	34	4.56	20.65	4.26	1.31	3.96	0.52	3.4	0.66	2.12	0.26	1.94	0.31	2.3	0.36	4.18
samp. 5719A5(1)	high-Ti	Wrangellia	49.54	1.92	14.57	12.84		11.5534		0.21	6.52	11.47	2.01	0.29	0.17	1.05	50.1489	41.37	366	162	77	42	167	104	19	5.8	200	26.3	113	10.1	0.09	94	7	23	3.05	16.26	4.45	1.48	4.58	0.79	5.31	0.97	2.94	0.35	2.46	0.36	3.23	0.63	0.87
samp. 5719A5(2)	high-Ti	Wrangellia	49.62	1.93	14.55	12.86		11.5714		0.21	6.55	11.5	2.02	0.3	0.17	1.09	50.2247	41.37	367	160	76	42	167	104	19	5.9	200	26.1	113	10	0.09	91	8	23	3.05	16.26	4.45	1.48	4.58	0.79	5.31	0.97	2.94	0.35	2.46	0.36	3.23	0.63	0.87
samp. 5719A6	high-Ti	Wrangellia	49.76	1.92	14.45	12.79		11.5084		0.21	6.65	11.45	2.12	0.24	0.17	2.66	50.7399		340	164	78			104	19	4.1	275	25.6	112	9.9		85	8	21
samp. 5725A2	high-Ti	Wrangellia	50.53	2.19	14.98	11.73		10.5547		0.2	5.99	11.74	1.99	0.46	0.21	1.26	50.2897		358	140	68			96	20	16.2	213	29.6	140	12.1		245	8	23
samp. 5725A4	high-Ti	Wrangellia	50.43	1.82	14.31	12.36		11.1215		0.2	6.66	12.13	1.78	0.42	0.16	1.03	51.6319	38.05	325	127	80	42	160	101	20	16.5	207	24.3	107	9.2	0.53	83	5	19	3	15.16	4.3	1.43	4.32	0.77	4.89	0.94	2.69	0.32	2.17	0.3	3.08	0.57	0.83
samp. 5726A1	high-Ti	Wrangellia	49.01	1.88	13.96	13.13		11.8144		0.23	7.07	11.74	2.26	0.25	0.16	1.88	51.6146	41.02	359	217	90	42	138	110	17	2.1	239	24.3	110	9.4	0.07	191	5	18	2.74	14.35	4.07	1.08	4.15	0.74	4.92	0.91	2.59	0.3	2.03	0.27	2.66	0.52	0.86
samp. 5726A2	high-Ti	Wrangellia	51.41	1.63	13.83	12.16		10.9416		0.19	6.96	11.25	2.2	0.11	0.14	1.6	53.1377		324	118	79			102	18	0.7	195	22.2	94	8		45	6	17
samp. 5726A3	high-Ti	Wrangellia	49.9	1.81	14.73	12.34		11.1035		0.21	6.72	11.96	1.95	0.09	0.16	1.35	51.8963		332	148	84			100	20	0.4	178	24.6	106	9.2		47	7	18
samp. 5726A6	high-Ti	Wrangellia	50.11	1.85	14.74	11.71		10.5367		0.19	6.75	12.7	1.94	0.13	0.16	1.29	53.3138		333	136	85			84	19	3.4	198	24.7	109	9.4		48	6	19
samp. 5727A2	low-Ti	Wrangellia	50.7	0.54	14.49	11.21		10.0868		0.19	9.41	12.3	1.09	0.06	0.04	2.18	62.4481	44.9	242	555	178	51	96	81	14	1.7	76	15.1	23	0.9	0.36	98	0	2	0.49	2.92	1.22	0.56	1.47	0.36	2.62	0.56	1.67	0.22	1.61	0.27	0.8	0.04	0.17
samp. 5727A3	low-Ti	Wrangellia	50.97	0.58	15.85	10.79		9.70884		0.19	7.75	11.96	1.76	0.1	0.05	2.3	58.7277	43.02	254	269	106	44	116	77	14	1.8	117	15.5	24	0.9	0.28	76	1	2	0.51	2.92	1.23	0.49	1.47	0.34	2.6	0.6	1.7	0.22	1.61	0.26	0.87	0.05	0.17
samp. 5727A5	low-Ti	Wrangellia	47.43	0.57	15.81	11.04		9.93379		0.19	10.35	13.12	1.06	0.09	0.07	2.87	65.0016		257	455	157			84	13	1.2	146	15.8	17	1		130	1	2
samp. 5727A6(1)	low-Ti	Wrangellia	48.89	0.48	15.06	10.51		9.4569		0.18	11.51	12.43	0.79	0.05	0.06	3	68.4501	45.67	233	521	214	54	98	74	12	0.6	123	14	15	0.8	0.12	46	1	3	0.54	3.05	1.11	0.37	1.33	0.34	2.35	0.55	1.63	0.21	1.53	0.25	0.57	0.04	0.07
samp. 5727A7	low-Ti	Wrangellia	46.13	0.56	17.97	11.84		10.6536		0.17	9.09	12.78	1.19	0.1	0.07	2.75	60.3325	50.33	268	199	163	57	131	92	15	1.5	155	17.2	20	0.8	0.23	54	2	3	0.8	3.86	1.3	0.67	1.63	0.38	2.8	0.64	1.93	0.25	1.91	0.33	0.7	0.05	0.29
samp. 5731A3	low-Ti	Wrangellia	50.94	0.53	15.51	9.75		8.77305		0.17	10.52	10.68	1.22	0.22	0.1	3.15	68.1279		217	605	191			68	12	4.6	205	17.2	38	2.2		125	4	11
samp. 5731A4	low-Ti	Wrangellia	48.61	0.48	15.89	10.32		9.28594		0.19	9.63	12	1.87	0.63	0.06	3.1	64.8954		232	373	141			67	12	15.9	392	13.8	26	1.4		173	3	7
samp. 5731A5	low-Ti	Wrangellia	48.12	0.92	16.1	11.5		10.3477		0.19	9.67	11.71	1.35	0.28	0.1	3.34	62.4883		256	578	232			72	15	6.5	272	20.4	45	1.6		108	2	9
samp. 5731A6	low-Ti	Wrangellia	49.13	0.64	15.9	9.69		8.71906		0.16	8.37	13.54	2.13	0.29	0.16	3.77	63.1162		237	412	137			62	13	3.3	484	16.2	35	2.8		190	6	14
samp. 5801A2	high-Ti	Wrangellia	50	2.37	14.02	13.68		12.3093		0.21	6.08	11.77	1.74	0.13	0.22	1.26	46.8222	37.45	386	211	80	43	207	115	20	1.7	225	29.4	146	13.1	0.12	57	9	31	4.14	21.1	5.55	1.79	5.49	0.93	6.21	1.13	3.25	0.37	2.66	0.38	4.03	0.76	1.24
samp. 5801A5	high-Ti	Wrangellia	49.75	1.91	15.17	13.13		11.8144		0.21	5.76	11.84	1.69	0.28	0.17	1.25	46.4978	38.99	358	58	56	41	182	111	20	5.9	187	26.2	113	10.3	0.09	70	7	20	3.07	15.51	4.25	1.46	4.4	0.8	5.22	1.01	2.93	0.35	2.5	0.36	3.17	0.61	0.84
samp. 5801A8	high-Ti	Wrangellia	50.82	1.09	15.06	12.51		11.2565		0.22	7.16	10.44	1.99	0.27	0.15	2.13	53.1366		285	69	56			118	16	4.6	148	26.7	59	3.9		118	6	13
samp. 5801A9	high-Ti	Wrangellia	49.97	2.33	13.95	12.28		11.0495		0.19	6.69	11.77	1.85	0.38	0.22	1.5	51.9063		330	129	81			95	19	5	190	24.8	109	9.4		73	5	21
samp. 5802A1	low-Ti	Wrangellia	49.18	0.71	16.27	10.82		9.73584		0.19	9.41	10	2.82	0.63	0.17	3.64	63.2748		265	360	142			73	12	16.3	485	18.1	40	3.1		186	6	13
samp. 5802A2	low-Ti	Wrangellia	49.94	0.48	15.33	10.44		9.39391		0.19	8.85	12.67	1.88	0.11	0.06	3.43	62.6778	50.28	247	364	127	44	89	68	11	2.1	303	15.3	23	1.3	0.3	44	3	6	1	4.04	1.31	0.45	1.57	0.34	2.53	0.57	1.76	0.23	1.75	0.39	0.78	0.08	0.56
samp. 5802A3	low-Ti	Wrangellia	47.76	0.52	16.76	10.42		9.37592		0.18	9.85	12.31	1.2	0.59	0.06	2.7	65.1898		242	346	151			70	13	16.9	260	14.9	29	1.7		198	4	8
samp. 5802A4(1)	low-Ti	Wrangellia	48.26	0.5	15.81	10.73		9.65485		0.19	13.49	9.2	1.48	0.05	0.09	4.51	71.3522	40.8	202	1596	539	60	78	74	13	0.4	183	15.4	35	2	0.5	39	4	7	1.48	6.61	1.69	0.51	1.84	0.4	2.62	0.56	1.76	0.23	1.69	0.27	1.05	0.11	0.89
samp. 5802A4(2)	low-Ti	Wrangellia	48.28	0.5	15.83	10.75		9.67285		0.19	13.47	9.19	1.51	0.05	0.09	4.53	71.2838	40.8	203	1577	538	60	78	74	13	0.5	184	15.2	35	2.1	0.5	37	5	11	1.48	6.61	1.69	0.51	1.84	0.4	2.62	0.56	1.76	0.23	1.69	0.27	1.05	0.11	0.89
samp. 5802A5	low-Ti	Wrangellia	46.68	0.93	16.19	12.21		10.9866		0.2	10.21	12.16	1.23	0.12	0.1	3.32	62.3577	45.91	257	633	244	58	103	82	16	3	252	20.7	46	1.5	0.3	40	2	4	1.32	6.68	2.19	0.84	2.53	0.54	3.76	0.79	2.3	0.29	2.12	0.33	1.51	0.08	0.34
samp. 5802A6	low-Ti	Wrangellia	51.77	0.9	14.82	11		9.8978		0.19	7.95	11.72	1.47	0.3	0.09	1.56	58.878		254	448	128			85	16	8.8	188	18.5	49	3		92	2	4
samp. 5806A3	high-Ti	Wrangellia	49.67	2.37	13.98	13.53		12.1743		0.21	6.4	10.36	2.14	0.68	0.22	1.82	48.3764		369	213	89			119	21	13.9	215	29.1	144	12.9		182	9	27
samp. 5806A5	high-Ti	Wrangellia	49.86	1.97	14.58	12.98		11.6794		0.21	6.6	10.83	2.25	0.57	0.17	1.62	50.1826		339	141	87			112	20	11.8	208	25.4	116	10.4		118	7	21
samp. 5806A6	high-Ti	Wrangellia	50.25	1.89	13.96	12.79		11.5084		0.21	6.62	12.24	1.59	0.29	0.17	1.67	50.6269		327	123	78			101	19	4.9	205	25.4	112	9.6		108	6	19
samp. 5808A1	high-Ti	Wrangellia	49.93	1.01	14.09	13.4		12.0573		0.22	7.31	11.9	1.61	0.31	0.1	1.98	51.9399		313	138	76			111	16	5.8	185	28.5	41	5.3		140	3	7
samp. 5808A2	high-Ti	Wrangellia	46.44	1.06	10.72	10.72		9.64586		0.15	15.42	9.59	1.34	0.35	0.09	3.2	74.0237	27.29	285.54	1327	620	67	123	60	13	6.11	126.86	16.01	58.73	6	0.43	72	6	15	1.96	9.85	2.69	0.94	2.77	0.51	3.25	0.66	1.79	0.21	1.48	0.22	1.71	0.35	0.7
samp. 5808A3	high-Ti	Wrangellia	46.89	1.18	10.72	10.72		9.64586		0.18	14.78	9.42	0.88	1.12	0.11	2.4	73.2003	29.39	297.75	1250	525	63	79	63	13	26.43	92.53	15.81	65.1	8.11	1.1	191	7	18	2.33	11.57	3.01	1.09	3.02	0.54	3.23	0.63	1.79	0.22	1.45	0.25	1.88	0.48	1.06
samp. 5808A6	low-Ti	Wrangellia	49.27	0.93	14.71	10.76		9.68185		0.2	8.88	11.31	1.73	1.57	0.27	2.16	62.0486		289	629	137			102	18	18.3	801	16.7	65	4		674	8	20
samp. 5808A8	high-Ti	Wrangellia	50.04	1.14	13.39	15.35		13.8119		0.25	6.57	11.27	1.52	0.06	0.11	1.96	45.8854		363	58	56			127	17	0.5	58	32.6	43	4.8		39	3	7
samp. 5810A1(1)	low-Ti	Wrangellia	47.02	0.57	15.84	10.94		9.84381		0.18	11.23	13.14	1.19	0.06	0.07	2.68	67.0359	50.28	261	493	208	53	98	74	13	0.9	151	15.5	18	1.1	0.17	62	1	3	0.57	3.31	1.26	0.43	1.51	0.36	2.59	0.57	1.74	0.24	1.7	0.27	0.66	0.04	0.09
samp. 5810A1(2)	low-Ti	Wrangellia	46.82	0.57	15.8	10.96		9.86181		0.18	11.16	13.09	1.04	0.07	0.07	2.65	66.8571	50.28	260	491	207	53	98	73	13	0.6	150	15.5	17	1	0.17	62	0	1	0.57	3.31	1.26	0.43	1.51	0.36	2.59	0.57	1.74	0.24	1.7	0.27	0.66	0.04	0.09
samp. 5810A2	low-Ti	Wrangellia	48.39	0.54	16.2	11.32		10.1857		0.2	9.96	12.21	1.22	0.07	0.06	2.62	63.5446	47.06	253	182	163	50	110	78	13	0.8	141	15.5	19	1	0.12	62	2	3	0.61	3.21	1.16	0.46	1.46	0.35	2.53	0.56	1.78	0.23	1.75	0.27	0.66	0.05	0.27
samp. 5810A4	low-Ti	Wrangellia	48.45	0.73	17.2	11.81		10.6266		0.2	7.32	12.5	1.25	0.06	0.12	2.19	55.1148	41.96	271	81	100	45	116	88	15	0.4	198	18.5	28	1.4	0.12	33	3	7	1.2	6.12	1.96	0.73	2.15	0.45	3.28	0.72	2.13	0.28	1.99	0.32	0.96	0.06	0.3
samp. 5810A6(1)	low-Ti	Wrangellia	48.75	0.64	16.2	12.01		10.8066		0.24	6.34	13.95	1.86	0.15	0.08	1.73	51.1194	43.29	261	131	91	43	85	98	14	2	170	17.2	26	1.3	0.18	75	3	2	0.83	4.52	1.55	0.51	1.79	0.42	2.94	0.64	1.95	0.26	1.88	0.33	0.88	0.1	0.28
samp. 5810A6(2)	low-Ti	Wrangellia	48.69	0.64	16.1	12.03		10.8246		0.24	6.26	13.98	1.77	0.15	0.08	1.72	50.7605	43.29	262	129	92	43	85	98	14	1.9	170	17.2	26	1.3	0.18	78	0	4	0.83	4.52	1.55	0.51	1.79	0.42	2.94	0.64	1.95	0.26	1.88	0.33	0.88	0.1	0.28
samp. 5810A10	high-Ti	Wrangellia	50.27	1.74	14.61	12.04		10.8336		0.19	6.71	12.81	1.3	0.14	0.15	1.49	52.4732	35.8	308	133	88	41	151	100	19	2.6	231	23	102	8.8	0.09	59	6	19	2.83	13.98	3.95	1.45	3.94	0.76	4.63	0.95	2.5	0.29	2.05	0.32	2.84	0.59	0.78
samp. 5811A1	low-Ti	Wrangellia	49.18	0.35	15.84	9.09		8.17918		0.17	11.93	12.38	0.88	0.07	0.05	3.27	72.2225		182	380	274			64	10	0.9	114	11.8	19	1.3		102	2	3
samp. 4718A1	high-Ti	Wrangellia	47.93	1.65	14.41	12.29		11.0585		0.17	6.25	10.22	3.22	0.24	0.15	2.72	50.186	40.7	328	93	87	48.7	177	83	19	4	418	25	86	8.4	0.7	173	7.88	19	2.71	13	3.57	1.4	4.39	0.76	4.55	0.9	2.57	0.36	2.15	0.31	2.6	0.59	0.65
samp. 4718A2(1)	high-Ti	Wrangellia	48.65	1.86	14.3	12.07		10.8606		0.18	6.21	11.85	2.28	0.18	0.14	1.38	50.4771	41.3	351	146	90	49.9	201	91	19	2	231	28	97	10.1	0.3	50	9.03	22.2	3.1	15.2	4.11	1.57	4.77	0.82	5.02	0.99	2.79	0.4	2.39	0.33	2.8	0.68	0.74
samp. 4718A2(2)	high-Ti	Wrangellia	49.07	1.84	14.15	12.48		11.2295		0.18	6.16	11.7	2.25	0.14	0.15	1.22	49.4399	40.4	353	125	88	48.9	198	91	20	2	228	28	94	10	0.2	49	8.72	21.6	3.02	14.5	4.05	1.48	4.87	0.82	4.79	0.96	2.72	0.39	2.32	0.32	2.8	0.65	0.72
samp. 4718A5	high-Ti	Wrangellia	48.41	1.4	15.89	9.9		8.90802		0.16	6.81	11.31	2.51	0.35	0.1	2.17	57.6764	38.9	285	290	125	46.1	167	77	17	6	282	22	72	7	0.5	71	6.5	15.5	2.15	10.7	3.03	1.18	3.59	0.63	3.8	0.77	2.2	0.32	1.9	0.27	2	0.45	0.52
samp. 4718A6	high-Ti	Wrangellia	48.69	1.36	15.92	10.74		9.66385		0.16	6.74	10.76	2.89	0.34	0.12	2.28	55.4219	38.3	279	297	122	45.4	158	73	19	6	332	22	71	6.8	0.5	98	6.58	16.2	2.2	11.2	3.13	1.2	3.64	0.64	3.87	0.78	2.27	0.32	1.96	0.27	2.2	0.46	0.53
samp. 4718A7	high-Ti	Wrangellia	48.44	1.49	14.74	12.13		10.9146		0.17	6.89	11.56	2.39	0.24	0.12	1.64	52.9475	40.2	317	252	115	51.4	159	82	18	4	263	24	77	6.5	0.2	62	6.1	15.4	2.23	11.4	3.42	1.25	3.9	0.68	4.12	0.84	2.34	0.33	2	0.28	2.1	0.41	0.54
samp. 4719A2	high-Ti	Wrangellia	49.68	1.71	14.93	9.75		8.77305		0.19	6.98	10.96	2.23	0.27	0.08	1.97	58.6479	42.8	341	130	94	53.1	180	86	16	5	281	26	86	7.4	0.2	143	7.17	18	2.62	13.2	3.67	1.47	4.32	0.76	4.68	0.94	2.66	0.37	2.23	0.3	2.6	0.53	0.61
samp. 4719A3	high-Ti	Wrangellia	49.08	1.68	14.06	12.21		10.9866		0.18	6.55	10.94	2.24	0.31	0.13	1.63	51.5209	42.8	341	131	103	53.4	168	87	18	5	286	26	83	7.3	0.2	133	7.02	17.7	2.52	12.5	3.66	1.39	4.24	0.74	4.41	0.89	2.45	0.35	2.11	0.3	2.5	0.49	0.61
samp. 4720A2	high-Ti	Wrangellia	49.24	1.58	13.54	11.3		10.1677		0.21	6.09	14	2.12	0.1	0.12	1.15	51.6367	41.1	325	151	83	50.5	167	79	19		192	25	83	7.9		28	7.2	17.3	2.42	12.2	3.43	1.33	4.12	0.71	4.28	0.87	2.48	0.34	2.05	0.29	2.4	0.51	0.57
samp. 4720A3	high-Ti	Wrangellia	48.47	1.72	13.52	11.61		10.4467		0.19	7.12	11.94	2.18	0.29	0.12	1.95	54.8519	46.2	344	168	93	56.2	184	88	17	6	214	27	90	8.6	0.2	81	7.88	19	2.72	13.5	3.85	1.47	4.48	0.78	4.78	0.95	2.69	0.38	2.33	0.33	2.6	0.6	0.64
samp. 4720A4	high-Ti	Wrangellia	49.16	1.78	14	13.3		11.9673		0.19	6.39	11.85	1.86	0.14	0.15	0.93	48.7657	42.9	349	122	92	53.7	202	92	20	2	179	27	97	9.1	0.2	34	8.44	20.5	2.88	14.3	4.07	1.49	4.7	0.81	4.9	0.99	2.81	0.39	2.31	0.33	2.7	0.6	0.68
samp. 4720A5	high-Ti	Wrangellia	48.88	1.78	13.84	13.46		12.1113		0.18	6.12	11.43	2.16	0.14	0.16	1.42	47.3895	44.5	362	156	105	54.8	185	93	19	1	188	28	92	8.2	0.1	38	8.07	19.5	2.73	13.5	3.87	1.45	4.74	0.83	4.92	0.98	2.79	0.4	2.46	0.35	2.6	0.56	0.61
samp. 4720A8	high-Ti	Wrangellia	48.02	1.77	14.34	13.18		11.8594		0.2	6.73	11.37	1.97	0.11	0.15	1.91	50.288	42	362	155	116	54.5	218	109	19		174	28	95	8.3	0.2	33	6.86	17.5	2.54	12.6	3.72	1.37	4.4	0.77	4.86	0.98	2.78	0.4	2.51	0.35	2.7	0.55	0.62
samp. 4720A9	high-Ti	Wrangellia	48.06	1.77	14.11	13.73		12.3543		0.19	6.35	11.61	2.08	0.11	0.16	1.37	47.8143	44	362	166	112	55.5	187	90	18	1	196	28	88	7.8	0.1	35	7.06	17.3	2.46	12.3	3.51	1.36	4.19	0.75	4.62	0.93	2.65	0.37	2.27	0.33	2.6	0.53	0.61
samp. 4721A1	high-Ti	Wrangellia	48.17	1.89	14.96	11.4		10.2577		0.18	6.39	11.75	1.93	0.1	0.13	2.11	52.6168	44.4	378	158	106	54.8	208	86	18	2	174	30	97	8.5	0.6	36	7.31	18.9	2.78	13.5	4.06	1.47	4.72	0.81	4.99	1.03	2.96	0.41	2.5	0.36	2.9	0.58	0.68
samp. 4721A2	high-Ti	Wrangellia	49.56	1.77	13.92	13.07		11.7604		0.17	6.06	12.15	2.01	0.09	0.16	0.76	47.8772	42.1	351	118	91	51.6	195	90	19	1	187	26	97	9	0.2	39	7.86	19.2	2.7	13.5	3.84	1.46	4.47	0.79	4.75	0.96	2.72	0.38	2.35	0.32	2.8	0.6	0.69
samp. 4721A3	high-Ti	Wrangellia	48.17	1.77	14.16	13.24		11.9134		0.18	6.61	11.3	2.03	0.15	0.14	1.78	49.7247	42.3	364	164	115	54.9	206	87	19	1	162	28	95	8.5	0.4	34	7.42	18.3	2.66	13.3	3.84	1.4	4.59	0.79	4.88	0.98	2.82	0.39	2.42	0.35	2.8	0.57	0.62
samp. 4721A4	high-Ti	Wrangellia	49.49	1.79	13.98	13.13		11.8144		0.18	6.46	11.76	1.92	0.12	0.14	0.87	49.3594	42.2	364	151	108	53.3	211	92	19	1	160	29	95	8.6	0.3	28	7.21	17.9	2.57	13	3.81	1.38	4.28	0.77	4.77	0.97	2.8	0.4	2.4	0.34	2.7	0.55	0.62
samp. 4721A5	high-Ti	Wrangellia	49.37	1.81	13.98	13.53		12.1743		0.2	5.98	11.59	1.92	0.15	0.15	1.04	46.6838	39.7	367	122	90	46.5	210	92	19	1	171	29	96	8.5	0.2	34	7.62	18.8	2.73	13.9	3.91	1.47	4.73	0.83	5.12	1.04	2.99	0.42	2.55	0.35	2.9	0.59	0.67
samp. 4722A2(1)	high-Ti	Wrangellia	48.33	1.8	13.59	13.75		12.3723		0.19	6.97	11.42	2.03	0.14	0.15	1.48	50.1056	39.2	365	143	107	50	189	104	19	2	190	27	96	8.3	0.2	34	6.95	17.8	2.53	12.9	3.72	1.41	4.42	0.77	4.61	0.94	2.65	0.38	2.32	0.32	2.8	0.55	0.66
samp. 4722A2(2)	high-Ti	Wrangellia	48.67	1.82	13.74	13.05		11.7424		0.19	7.02	11.42	2.05	0.13	0.14	1.34	51.59	29.2	365	98	105	37.7	189	103	19	2	193	28	87	8.4	0.2	34	7.34	18.5	2.64	12.7	3.66	1.42	4.62	0.77	4.6	0.94	2.7	0.38	2.27	0.34	2.6	0.54	0.64
samp. 4722A2(3)	high-Ti	Wrangellia	47.23	1.78	13.77	14.13		12.7142		0.19	7.09	11.43	2.02	0.06	0.14	1.38	49.8508	41.6	362	162	93	55.7	178	98	20	2	178	26	94	8.5	0.4	28	7.65	19.3	2.94	13.6	4.05	1.55	4.76	0.83	4.92	0.92	2.64	0.389	2.41	0.349	2.8	0.6	0.59
samp. 4722A2(4)	high-Ti	Wrangellia	48.16	1.78	13.62	13.76		12.3812		0.19	7.09	11.48	2.08	0.14	0.12	1.37	50.5141	41.5	362	165	93	53.5	174	94	17	2	190	27	102	8.5	0.2	33	6.95	17.8	2.67	13.3	3.77	1.42	4.59	0.8	4.77	0.95	2.69	0.37	2.28	0.34	2.8	0.57	0.68
samp. 4723A10	high-Ti	Wrangellia	50.03	2.08	12.31	15.21		13.686		0.22	5.66	9.19	2.94	0.7	0.18	1.55	42.4364	38.3	496	34.2	61	47.1	306	107	20	12	299	32	110	9.7	0.4	152	8.93	21.5	3.1	15.5	4.2	1.62	5.21	0.9	5.4	1.11	3.23	0.45	2.71	0.39	3.1	0.65	0.77
samp. 4724A5	high-Ti	Wrangellia	48.08	1.73	16.39	11.13		10.0148		0.2	5.54	12.38	2.01	0.1	0.15	1.29	49.6499	34.4	299	207	98	43.1	198	76	21		272	25	92	8.6	0.1	32	7.98	19.4	2.72	13.3	3.69	1.42	4.58	0.75	4.53	0.89	2.54	0.36	2.26	0.32	2.7	0.6	0.69
samp. 5614A10	high-Ti	Wrangellia	46.69	1.76	13.32	12.72		11.4455		0.17	7.09	10.62	3.49	0.01	0.14	3.53	52.4769	43.8	354	195	93	48.9	134	80	20		86	26	90	8.1	0.8	11	8.04	19.7	2.96	13.7	3.88	1.44	4.47	0.79	4.59	0.85	2.47	0.37	2.27	0.325	2.7	0.6	0.75
samp. 5614A11	high-Ti	Wrangellia	48.06	1.74	13.35	12.96		11.6614		0.19	6.38	10.51	3.23	0.44	0.13	2.39	49.3737	43.8	362	76	67	53.6	181	93	17	9	381	27	86	8	0.4	80	7.23	18	2.68	12.3	3.6	1.39	4.24	0.77	4.57	0.89	2.53	0.36	2.26	0.329	2.5	0.5	0.62
samp. 5614A13	high-Ti	Wrangellia	47.78	1.86	12.91	14.23		12.8042		0.21	6.47	10.24	2.91	0.44	0.15	2.02	47.3891	42.4	372	71.9	65	51.5	165	102	20	8	274	29	98	9	0.1	85	8.51	20.9	3.08	14.7	4.2	1.59	4.79	0.87	5.12	0.98	2.83	0.413	2.54	0.375	2.9	0.7	0.66
samp. 5615A1	high-Ti	Wrangellia	47.61	1.87	13.55	14.34		12.9031		0.19	7.42	9.86	2.87	0.21	0.15	1.92	50.6193	44.5	380	172	86	57.4	182	84	19	5	287	29	98	8.6	0.9	39	8.17	20.2	3.01	14.3	4.12	1.58	4.88	0.85	5.01	0.94	2.7	0.404	2.51	0.365	3	0.6	0.64
samp. 5615A8	high-Ti	Wrangellia	48.31	1.75	13.45	13.48		12.1293		0.2	6.78	11.77	1.8	0.03	0.14	1.74	49.9104	40.4	353	173	96	53	175	88	20	2	194	28	91	8	0.6	39	7.32	18.4	2.69	12.9	3.78	1.47	4.4	0.79	4.65	0.89	2.58	0.379	2.34	0.339	2.7	0.6	0.59
samp. 5615A10	high-Ti	Wrangellia	47.29	1.81	13.7	14.23		12.8042		0.2	6.77	10.65	2.58	0.21	0.14	1.57	48.5203	39.8	363	166	94	52.4	185	86	20	9	279	28	96	8.5	1.3	61	7.34	18.5	2.84	13.2	3.92	1.48	4.65	0.81	4.79	0.91	2.58	0.38	2.42	0.348	2.8	0.6	0.61
samp. 5616A2	high-Ti	Wrangellia	46.72	1.94	13.21	14.11		12.6962		0.24	6.29	11.19	2.49	0.01	0.16	3.38	46.8971	41.6	401	76	58	50.8	210	85	22		67	30	100	9.2		8	8.87	21	3.02	14.4	4.16	1.59	4.81	0.86	5.07	0.92	2.72	0.413	2.62	0.378	2.9	0.6	0.63
samp. 5618A1	high-Ti	Wrangellia	48.61	1.75	12.82	13.81		12.4262		0.21	6.96	10.54	2.76	0.5	0.14	1.8	49.9608	42.9	367	114	79	53	25	89	19	8	227	27	89	8.1	0.4	103	7.72	19.1	2.85	13.5	3.98	1.47	4.56	0.79	4.71	0.88	2.56	0.375	2.35	0.342	2.7	0.6	0.57
samp. 5618A3	high-Ti	Wrangellia	47.9	1.36	13.79	11.62		10.4557		0.16	6.57	12.08	3.13	0.12	0.1	3.17	52.8328	41.8	313	194	67	46	125	92	18	3	170	21	67	6.6		17	6.57	15.4	2.22	10.5	2.98	1.21	3.56	0.63	3.84	0.75	2.16	0.331	2.12	0.296	2	0.5	0.45
samp. 5618A4	high-Ti	Wrangellia	40.29	2.16	16.27	18.1		16.2864		0.28	9.7	6.78	0.58	0.52	0.18	4.77	51.4961	54.2	499	159	68	62	109	75	24	10	220	38	112	9.8	0.6	109	10.7	24.3	3.48	15.9	4.53	2.04	5.64	0.99	5.95	1.15	3.36	0.495	3.11	0.455	3.3	0.7	0.71
samp. 4722A4(1)	low-Ti	Wrangellia	43.85	0.43	11.56	10.11		9.09698		0.16	17.74	9.43	0.53	0.1	0.04	5.45	77.6597	38.3	201	1710	755	80.3	92	77	10	5	100	16	16	0.7	2.8	19	1.06	2.6	0.41	2.6	0.92	0.38	1.4	0.3	2.16	0.49	1.53	0.24	1.58	0.23	0.5	0.09	0.1
samp. 4722A4(2)	low-Ti	Wrangellia	43.84	0.43	11.74	9.65		8.68307		0.16	17.51	9.36	0.53	0.13	0	5.33	78.2358	40.1	189	1830	755	84.6	83	55	9	4	97	13	19	0.9	2.7	18	0.96	2.5	0.38	2.3	0.84	0.37	1.42	0.3	2.17	0.5	1.54	0.23	1.52	0.23	0.6	0.03	0.11
samp. 4722A4(3)	low-Ti	Wrangellia	42.94	0.42	11.26	10.82		9.73584		0.16	18.28	8.98	0.54	0.02	0.03	5.7	76.9955	36.4	194	1750	755	80	83	55	11	6	93	15	16	0.7	5.8	27	1.08	2.6	0.43	2.5	0.87	0.405	1.45	0.3	2.11	0.47	1.54	0.242	1.62	0.244	0.6		0.09
samp. 4723A3	low-Ti	Wrangellia	44.41	0.54	12.75	10.33		9.29493		0.15	15.42	8.73	0.78	0.07	0.05	5.61	74.7299	41	218	1570	656	72.9	110	60	12	2	64	17	29	1.3	0.9	15	1.8	4.5	0.67	3.8	1.27	0.51	1.86	0.37	2.6	0.59	1.86	0.29	1.85	0.28	0.9	0.06	0.2
samp. 4723A4	low-Ti	Wrangellia	44.39	0.66	14.93	10.11		9.09698		0.14	13.02	9.73	1.56	0.07	0.06	4.91	71.8414	38.1	235	725	339	60.4	106	63	13	2	132	18	36	1.1	0.8	20	1.78	4.5	0.71	4.1	1.48	0.63	2.16	0.42	2.79	0.6	1.79	0.26	1.67	0.25	1	0.05	0.1
samp. 4723A13(1)	low-Ti	Wrangellia	44.62	0.44	13.71	10.38		9.33992		0.14	14.47	9.37	0.86	0.06	0.05	5.59	73.4162	43.5	219	1370	583	72.2	142	106	12	2	73	16	24	0.8	0.7	13	1.4	3.4	0.52	3	1	0.46	1.71	0.36	2.54	0.59	1.89	0.29	1.89	0.29	0.7	0.04	0.15
samp. 4723A13(2)	low-Ti	Wrangellia	44.71	0.44	13.75	10.37		9.33093		0.14	14.48	9.36	0.86	0.07	0.05	5.59	73.4485		222		583		98	62	12	1	73	17	22	0.7	0.7	13	1.36	3.4	0.51	2.9	1.01	0.44	1.69	0.35	2.5	0.56	1.79	0.28	1.84	0.28	0.7	0.04	0.14
samp. 5614A1	low-Ti	Wrangellia	46.24	0.47	14.57	8.57		7.71129		0.15	12.11	10.81	1.3	0.01	0.04	4.91	73.6801	45	222	1370	564	68.7	104	53	11	0.7	120	18	22	0.7	0.4	18	1.79	4.3	0.65	3.4	1.11	0.501	1.74	0.37	2.67	0.6	1.87	0.297	2.01	0.308	0.7		0.15
samp. 5615A7	low-Ti	Wrangellia	44.08	0.45	11.68	10.98		9.8798		0.18	17.94	9.19	0.37	0.11	0.04	4.98	76.3976	39.5	222	1850	680	89.3	80	54	10	6	120	15	15	0.7	4.5	24	1.02	2.6	0.41	2.4	0.85	0.361	1.35	0.3	2.12	0.46	1.46	0.236	1.58	0.245	0.5		0.08
samp. 5615A12	low-Ti	Wrangellia	45.35	0.64	14.07	10.4		9.35792		0.14	12.56	9	2.11	0.02	0.06	4.68	70.5236	38.3	215	906	368	67.2	83	50	14	2	189	16	35	1.4	0.6	15	1.73	4.7	0.77	4.4	1.47	0.607	2.13	0.42	2.78	0.59	1.78	0.267	1.75	0.269	1.1		0.09
samp. 5616A1	low-Ti	Wrangellia	43.7	0.44	13.66	10.47		9.42091		0.16	15.55	8.71	0.98	0.04	0.04	6.05	74.6341	37.5	204	3000	559	67.9	77	53	12	1.1	112	16	22	0.9	0.8	20	1.52	3.6	0.55	3	1.02	0.454	1.57	0.34	2.44	0.55	1.73	0.268	1.77	0.277	0.7		0.14
samp. 93G171	low-Ti	Wrangellia	47.93	0.46	14.02	9.93		8.93501		0.19	15.84	10.42	1.02	0.11	0.08		75.9625		140	606	491		91	57				13	24	0.9		20	1.4	3.6	0.56	2.9	1.23	0.47	2.1	0.32	2.38	0.64	2.11	0.297	1.97	0.282	0.8	0.1	0.15
samp. 4723A2	low-Ti	Wrangellia	46.73	0.61	15.24	10.26		9.23195		0.16	10.27	9.93	2.26	0.38	0.06	3.7	66.4769	47.2	261	358	163	48.8	111	61	13	10	271	20	33	1.5	6.5	84	1.94	5	0.74	4.2	1.41	0.52	2.09	0.42	2.91	0.67	2.1	0.32	2.06	0.31	1	0.08	0.23
samp. 5614A3	low-Ti	Wrangellia	48.43	0.48	14.9	7.59		6.82948		0.13	10.66	10.68	1.51	0.06	0.04	4.13	73.5617	48.8	217	1420	551	76.1	111	51	12	1.5	130	17	24	0.8	0.4	20	1.71	4	0.59	3.2	1.09	0.483	1.71	0.37	2.66	0.59	1.87	0.292	1.99	0.312	0.7		0.17
samp. 5614A5	low-Ti	Wrangellia	47.1	0.51	14.52	9.12		8.20618		0.14	10.92	10.78	2.1	0.01	0.05	4.67	70.3448	43.7	206	797	315	68.6	96	48	13	0.3	141	16	19	0.5		9	0.91	2.5	0.43	2.7	1.02	0.526	1.6	0.34	2.35	0.52	1.67	0.27	1.8	0.267	0.6		0.08
samp. 5616A7	low-Ti	Wrangellia	46.75	0.73	15.92	10.88		9.78982		0.15	8.7	11.69	2.12	0.07	0.04	2.86	61.3024	50.7	270	346	122	56.7	111	51	15	6.6	181	19	26	1.1	0.3	23	1.51	3.8	0.59	3.5	1.36	0.638	2.05	0.43	2.9	0.61	1.91	0.305	2.02	0.302	0.8		0.14
samp. 4722A4	low-Ti	Wrangellia	46.05	0.47	12.47	11.37		10.2307		0.19	18.67	9.71	0.57	0.12	0.04	5.28	76.4873	38.0131	184	1784	755	63.9449	70.6444	62	10	3.16	77	14.2	19	1	2.25942	37	2	1	0.509627	2.7	1.07	0.441164	1.7316	0.352396	2.53169	0.609925	1.8776	0.274994	1.83091	0.29	0.48	0.0479898	0.07
samp. 4723A13	low-Ti	Wrangellia	46.9146	0.496131	14.7666	10.9039		9.81135		0.165863	15.0156	10.2101	1.03925	0.0532965	0.0486261	5.21	73.1768	42.6452	208	1541	583	59.6535	75.0291	68	11	0.67	63	16.5	27	1	0.465499	20	2	3	0.698579	3.54	1.33	0.552456	2.08764	0.43206	3.02632	0.733685	2.25822	0.336776	2.1888	0.35	0.63	0.0481106	0.11
samp. 4722A2	high-Ti	Wrangellia	48.48	1.89	14.23	13.96		12.5612		0.21	7.18	11.87	2.06	0.11	0.16	1.49	50.4687		351	160	95			126	19	1.4	182	25.7	109	9.4		39	5	16
samp. 231	high-Ti	Wrangellia	45.16	2.17	14.82	13.6		12.2373		0.25	7.85	9.21	2.42	0.42	0.18	3.92	53.3472	40	446	214	78	49	230	202	22	7	171	33.1	113	9.7	1.4	83	9.32	22.4	3.29	16.8	4.97	1.68	5.81	1.01	6.23	1.28	3.83	0.55	3.29	0.47	3.2	0.59	0.62
samp. 441	low-Ti	Wrangellia	45.94	0.55	16.88	11.14		10.0238		0.21	9.48	7.08	1.65	3.17	0.07	4.01	62.7683	36.6	181	201	139	44	56	71	15	38	174	14.8	21	1	2	258	1.1	2.7	0.43	2.7	1.14	0.48	1.72	0.34	2.3	0.53	1.74	0.27	1.61	0.24	0.7	0.02	0.14
samp. 561	low-Ti	Wrangellia	46.98	0.88	14.96	10.6		9.53788		0.2	9.37	8.46	3.13	0.82	0.19	3.52	63.6523	39.5	233	370	100	29	30	50	12	16	219	19.2	46	5.9	5.2	376	7.58	15.5	2.06	9.3	2.53	0.94	2.87	0.53	3.4	0.7	2.1	0.33	2.12	0.32	1.4	0.36	0.9
samp. 820	high-Ti	Wrangellia	46.78	1.74	16.69	12.18		10.9596		0.16	6.4	8.48	3.2	1.64	0.15	2.73	51.0036	29	237	154	72	35	77	79	21	36	249	21.7	87	8.2	1.2	149	6.58	15.8	2.36	11.8	3.59	1.35	3.95	0.69	4.06	0.82	2.48	0.36	2.12	0.3	2.4	0.49	0.58
samp. 851	low-Ti	Wrangellia	50.65	0.5	13.26	10.42		9.37592		0.19	9.83	7.43	4.19	0.32	0.09	3.12	65.1436	35.8	284	1000	335	61	35	77	14	4	113	16.3	26	1.1	1.1	56	2.7	6.5	0.86	4.6	1.47	0.55	1.96	0.37	2.53	0.57	1.82	0.27	1.75	0.26	0.8	0.04	0.52
samp. 881	low-Ti	Wrangellia	47.4	0.55	14.49	12.66		11.3915		0.21	8.13	9.53	3.04	0.71	0.07	3.02	55.9901	39.8	323	310	101	55	68	94	17	13	102	16.8	26	1	2	160	1.58	4	0.58	3.2	1.27	0.46	1.88	0.39	2.56	0.56	1.86	0.28	1.73	0.26	0.8	0.03	0.3
samp. 961	low-Ti	Wrangellia	49.48	0.78	16.41	10.89		9.79882		0.2	7.28	7.35	2.31	2.52	0.18	2.96	56.9775	33.8	294	138	67	38	24	91	18	36	184	18.9	49	2.9	0.7	311	7.78	16	2.11	9.8	2.62	0.94	3.02	0.49	3.19	0.69	2.24	0.33	2.01	0.31	1.4	0.16	1.04
samp. 1031	low-Ti	Wrangellia	49.03	0.67	13.93	10.69		9.61886		0.17	9.37	7.36	4.11	0.3	0.19	4.13	63.4565	35.4	195	274	114	41	73	79	10	4	296	16.8	62	3.2	0.2	624	12.1	23.8	2.88	11.6	2.74	0.79	2.68	0.44	2.74	0.58	1.81	0.27	1.63	0.25	1.5	0.13	1.39
samp. 1131	low-Ti	Wrangellia	48.74	0.75	16.15	10.66		9.59187		0.14	8.91	6.63	4.16	0.42	0.14	3.45	62.3474	33.6	225	179	63	32	35	54	13	4	236	14.6	20	0.6	1.7	134	2.71	6.3	0.93	5.1	1.76	0.68	2.17	0.4	2.44	0.53	1.63	0.24	1.43	0.22	0.6	0.04	0.14
samp. 1141	low-Ti	Wrangellia	52.23	0.8	16.17	10.33		9.29493		0.18	5.62	6.53	3.5	1.84	0.2	2.55	51.8723	29.4	325	60	65	38	48	208	22	33	235	21.1	66	4.2		370	8.26	19.1	2.35	10.8	2.87	0.95	2.98	0.54	3.28	0.69	2.16	0.33	2.08	0.33	1.8	0.21	1.72
samp. 1241	low-Ti	Wrangellia	48.52	0.78	13.69	10.42		9.37592		0.12	7.23	9.39	3.14	0.13	0.18	6.68	57.8875	33.9	238	198	63	32	82	51	17	3	52	16.5	34	1.4	1.3	20	5.32	12.1	1.7	8.1	2.44	0.85	2.74	0.49	2.88	0.61	1.89	0.29	1.84	0.26	1.1	0.09	0.45
samp. 1301	low-Ti	Wrangellia	49.31	0.56	14.26	10.29		9.25894		0.18	10.83	7.6	3.7	0.27	0.1	3.2	67.5856	40.2	248	440	129	47	102	69	11	4	103	14.1	23	1.7	0.5	62	2.43	5.7	0.85	4.7	1.56	0.6	2.02	0.41	2.53	0.54	1.7	0.26	1.54	0.23	0.7	0.04	0.36
samp. 1321	low-Ti	Wrangellia	46.05	0.83	16.45	12.11		10.8966		0.15	8.77	8.09	2.69	1.28	0.16	3.69	58.9271	34.5	226	115	58	36	49	60	16	8	221	17.6	36	2.3	0.2	135	4.54	10.3	1.48	7.4	2.32	0.81	2.56	0.49	2.98	0.63	2.05	0.31	1.9	0.27	1.1	0.09	0.26
samp. 1361	low-Ti	Wrangellia	47.67	0.84	17.96	10.08		9.06998		0.18	5.51	12	2.71	0.42	0.16	2.51	51.9904	28.5	316	83	29	30	169	70	19	2	478	16.2	42	1.9	0.4	144	6.19	13.5	1.94	9.7	2.64	0.94	2.85	0.46	2.86	0.62	1.91	0.28	1.71	0.24	1.3	0.08	0.54
samp. 1391	low-Ti	Wrangellia	45.16	0.76	14.87	10.44		9.39391		0.2	9.52	12.11	2.46	0.34	0.12	4.27	64.3685	37.1	291	476	139	43	53	63	17	4	213	15.7	39	1.8	0.4	200	4.58	10.5	1.52	8	2.26	0.85	2.56	0.41	2.68	0.55	1.78	0.25	1.52	0.23	1.2	0.06	0.46
samp. 1451	high-Ti	Wrangellia	49.68	1.84	16.86	8.06		7.25239		0.21	8.05	10.35	2.74	0.46	0.18	1.63	66.4275	30.5	371	273	93	46	19	118	25	7	317	23.3	107	8.3	1.3	87	6.37	18.6	2.59	13.2	3.83	1.43	4.03	0.71	4.16	0.83	2.42	0.34	1.97	0.26	2.9	0.52	0.65
samp. 1561	high-Ti	Wrangellia	48.41	1.65	15.34	12.31		11.0765		0.17	5.85	8.9	3.55	1.26	0.15	2.67	48.4924	36.9	384	286	113	52	11	100	22	14	115	25.7	66	2.9	0.3	64	2.86	7.7	1.32	8.4	3.06	1.21	4.03	0.72	4.57	0.96	2.88	0.42	2.46	0.35	1.9	0.12	0.28
samp. 1691	high-Ti	Wrangellia	45.76	1.94	16.67	10.85		9.76283		0.22	8.32	8.49	3.41	0.48	0.17	3.81	60.3039	29.7	264	195	67	38	1050	94	23	4	298	25.3	108	8.7	0.3	27	7.31	18.6	2.73	14.3	4.22	1.48	4.56	0.78	4.63	0.92	2.76	0.39	2.32	0.33	2.9	0.55	0.64
samp. 1741	low-Ti	Wrangellia	45.95	0.71	14.92	10.11		9.09698		0.16	10.54	10.99	1.93	0.55	0.12	4.1	67.3773	27.8	281	938	235	49		73	18	5	174	15.6	45	1.7	0.3	94	4.97	12.5	1.67	8.2	2.3	0.81	2.38	0.43	2.53	0.52	1.7	0.25	1.56	0.22	1.2	0.07	0.65
samp. 1801	high-Ti	Wrangellia	48.18	1.94	13.57	13.46		12.1113		0.15	7.08	8.83	3.69	0.28	0.17	2.77	51.0298	42.8	327	234	76	37	89	69	20	4	197	27.6	96	7.8		30	6.8	17.3	2.53	13.2	3.92	1.43	4.62	0.81	4.89	1.01	3.11	0.44	2.58	0.38	2.7	0.52	0.56
samp. 2131	low-Ti	Wrangellia	48.42	0.72	15.34	11.14		10.0238		0.19	7.37	11.95	1.92	0.54	0.19	1.98	56.7221	35	217	186	76	35	70	69	15	6	352	18.6	30	3.9	0.1	135	5.64	11.8	1.63	7.8	2.33	0.83	2.53	0.47	2.97	0.66	2.12	0.32	1.98	0.29	1	0.08	0.73
samp. 2151	low-Ti	Wrangellia	50.98	0.69	14.48	9.81		8.82704		0.14	6.84	7.45	5.44	0.12	0.14	4.03	58.0063	29.8	173	244	110	32	26	70	11	1	73	15.1	25	1.4	0.6	25	4.24	8.2	1.15	5.9	1.91	0.7	2.2	0.41	2.62	0.6	1.79	0.27	1.62	0.24	0.8	0.04	0.19
samp. 2191	low-Ti	Wrangellia	48.69	0.55	15.83	11.28		10.1497		0.18	8.37	10.72	2.98	0.42	0.11	1.1	59.5143	40.6	330	390	135	51	56	86	15	10	370	15.7	20	1.1	1	256	2.47	5.9	0.82	4.2	1.41	0.54	1.83	0.35	2.35	0.52	1.76	0.27	1.68	0.26	0.7	0.04	0.2
samp. 2221	low-Ti	Wrangellia	44.39	0.86	13.02	13.43		12.0843		0.16	5.57	11.13	4.57	0.11	0.19	6.53	45.1045	41.8	235	162	67	40	119	61	16	2	57	20.9	44	2.3	0.4	17	5.54	12.5	1.76	8.8	2.61	0.96	2.96	0.54	3.53	0.76	2.45	0.38	2.41	0.35	1.2	0.12	0.56
samp. 4806A4	low-Ti	Wrangellia	47.99	0.78	13.25	12.46		11.2115		0.15	8.23	7.96	4.01	0.44	0.11	3.65	56.6825	60	364	148	64	43.8	121	53	16	4	116	24	26	1.1	0.5	86	3.99	8.9	1.28	6.6	2.12	0.85	2.88	0.56	3.76	0.83	2.57	0.39	2.5	0.38	0.9	0.05	0.42
samp. 4806A5	low-Ti	Wrangellia	47.54	0.75	15.32	12.35		11.1125		0.12	6.28	8.06	4.67	0.28	0.17	3.71	50.184	50.5	304	140	61	39.3	80	48	14	3	93	24	36	1.8	1.4	62	6.92	20.3	1.95	8.6	2.36	0.88	3.13	0.57	3.58	0.76	2.36	0.36	2.29	0.33	1.2	0.1	0.78
samp. 4806A6	low-Ti	Wrangellia	47.75	0.93	13.29	12.34		11.1035		0.15	7.88	9	3.62	0.11	0.14	3.89	55.8513	56.7	370	208	66	46.7	28	58	16	1	62	20	29	1.1	2	39	3.56	8.3	1.29	6.9	2.17	0.9	2.85	0.54	3.52	0.73	2.2	0.33	2.14	0.3	1	0.06	0.19
samp. 4806A7	low-Ti	Wrangellia	47.56	0.78	15.27	10.9		9.80782		0.13	8.81	8.06	2.27	1.36	0.12	4.52	61.5566	45.2	312	201	79	44	23	52	16	15	302	17	26	1.2	1.8	186	3.82	8.9	1.34	6.7	2	0.85	2.65	0.46	2.91	0.61	1.83	0.27	1.69	0.25	0.9	0.05	0.12
samp. 4807A7	high-Ti	Wrangellia	48.43	1.73	12.88	12.5		11.2475		0.15	5.45	10.25	3.45	0.47	0.13	4.44	46.3449	37.9	332	180	57	34	96	65	18	15	229	27	102	8.1		84	6.98	17.9	2.68	13.2	3.74	1.44	4.72	0.81	4.85	0.96	2.74	0.38	2.33	0.33	2.8	0.55	0.61
samp. 4807A8	high-Ti	Wrangellia	43.56	1.53	15.06	11.61		10.4467		0.14	5.65	12.36	2.64	1.27	0.12	5.29	49.086	34.2	309	291	161	51	130	68	15	15	415	21	80	6.1		170	4.97	12.6	1.86	9.2	2.63	1.06	3.28	0.56	3.34	0.66	1.88	0.26	1.62	0.23	2.1	0.43	0.44
samp. 4807A9	high-Ti	Wrangellia	47.48	1.79	15.43	11.04		9.93379		0.15	6.84	7.51	3.3	1.6	0.12	4.16	55.1049	38.9	341	185	75	41.1	49	77	20	29	230	27	97	8.4	3.1	217	7.02	17.7	2.64	12.7	3.65	1.46	4.68	0.8	4.78	0.93	2.63	0.37	2.28	0.33	2.7	0.57	0.52
samp. 4808A2	low-Ti	Wrangellia	51.85	0.87	18.07	6.93		6.23561		0.07	5.87	6.72	3.33	0.8	0.32	4.46	62.6596	44.3	261	149	37	26.9	40	99	17	14	451	21	63	6.1	0.9	203	12.28	24.8	3.08	13.1	3.07	1.18	3.62	0.63	3.84	0.81	2.55	0.4	2.58	0.4	1.7	0.35	1.07
samp. 4808A4(1)	high-Ti	Wrangellia	48.79	1.5	13.94	11.79		10.6086		0.16	6.28	10.01	2.91	0.99	0.1	2.9	51.3438	45.6	313	251	89	46.4	102	74	18	15	238	26	82	6.6	2.2	98	6.02	15.2	2.3	11.2	3.38	1.31	4.36	0.75	4.63	0.94	2.75	0.41	2.49	0.34	2.5	0.44	0.5
samp. 4808A4(2)	high-Ti	Wrangellia	47.12	1.39	14.55	10.15		9.13297		0.18	7.58	10.84	2.68	0.55	0.06	3.5	59.6688	40.2	280	356	119	50.2	12	69	15	7	209	22	68	5.3	1.3	69	4.77	12.2	1.84	9.5	2.79	1.12	3.58	0.62	3.92	0.78	2.21	0.32	1.98	0.28	2	0.37	0.41
samp. 4808A8(1)	high-Ti	Wrangellia	47.1	1.43	14.37	10.96		9.86181		0.18	7.5	10.73	2.74	0.6	0.09	3.56	57.5493	41.2	291	355	125	49.8	13	69	18	8	213	23	73	5.8	1.4	70	5.01	12.7	1.93	9.7	2.92	1.16	3.86	0.67	4.12	0.83	2.39	0.35	2.08	0.28	2.2	0.4	0.41
samp. 4808A8(2)	high-Ti	Wrangellia	49.88	1.46	14.22	9.85		8.86303		0.16	6.31	10.07	2.85	0.92	0.06	2.98	55.9297	41.5	307	250	88	47.6	102	75	13	15	232	27	77	6.1	2	96	5.49	14.1	2.13	10.7	3.19	1.24	4.24	0.74	4.49	0.93	2.66	0.38	2.3	0.33	2.3	0.43	0.5
samp. 4810A1	low-Ti	Wrangellia	48.24	0.87	15.14	11.9		10.7076		0.16	5.76	8.41	3.59	1.41	0.18	3.88	48.9513	38.2	304	88	59	40.2	74	59	18	21	256	22	61	3.1	0.6	184	7.76	17.1	2.36	10.5	2.83	1.02	3.37	0.58	3.65	0.77	2.35	0.35	2.26	0.35	1.8	0.19	1.11
samp. 4810A3	low-Ti	Wrangellia	45.6	0.82	16.8	10.86		9.77183		0.19	7.06	8.88	2.79	1.6	0.18	4.7	56.2916	43.3	313	211	69	43.4	14	68	15	25	412	19	30	1.7	2.2	395	4.52	10.4	1.5	7.2	2.15	0.83	2.72	0.47	2.92	0.6	1.81	0.27	1.7	0.25	1	0.08	0.18
samp. 4810A5(1)	low-Ti	Wrangellia	48.52	0.84	14.96	12.21		10.9866		0.13	5.22	7.72	4.74	0.56	0.16	3.58	45.8567	44.8	284	112	46	38.9	111	50	17	5	165	25	40	1.8	0.2	109	5.95	12.9	1.76	8.5	2.48	0.97	3.37	0.6	3.84	0.84	2.57	0.39	2.48	0.37	1.2	0.1	0.73
samp. 4810A5(2)	low-Ti	Wrangellia	48.6	0.82	14.95	12.25		11.0226		0.13	5.26	7.79	4.73	0.53	0.16	3.58	45.9651		265		45		103	47	11	7	160	23	33	1.6	0.3	103	5.61	12.1	1.66	7.9	2.33	0.9	3.19	0.58	3.63	0.78	2.38	0.36	2.31	0.35	1.1	0.1	0.66
samp. 4810A7	low-Ti	Wrangellia	48.84	0.47	14.35	9.57		8.61109		0.15	8.65	9.21	3.73	0.29	0.06	3.98	64.1659	44.4	242	349	119	48.7	43	63	13	4	171	16	30	1.5	0.5	74	4.06	8.7	1.2	5.4	1.48	0.57	2.03	0.38	2.5	0.55	1.72	0.26	1.73	0.26	1	0.09	0.86
samp. 4810A8(1)	low-Ti	Wrangellia	50.77	0.5	14.8	7.6		6.83848		0.19	10.09	6.46	3.68	1.53	0.09	3.91	72.453	44.2	197	328	107	49.7	1337	97	7	23	376	15	24	1.1	1.9	782	3.39	7.9	1.14	5.5	1.58	0.56	2.05	0.38	2.53	0.54	1.67	0.24	1.57	0.24	0.8	0.06	0.52
samp. 4810A8(2)	low-Ti	Wrangellia	50.66	0.5	14.73	7.3		6.56854		0.19	10.11	6.51	3.69	1.47	0.08	3.88	73.2883	47.6	197	323	105	47.5	1297	98	7	20	375	16	28	1.3	1.6	778	3.41	7.9	1.11	5.3	1.49	0.56	1.96	0.38	2.46	0.53	1.6	0.24	1.55	0.22	0.8	0.05	0.53
samp. 4810A10	low-Ti	Wrangellia	49.35	0.88	14.31	10.6		9.53788		0.14	6.76	8.4	4.32	0.07	0.15	4.09	55.8189	48.1	373	88	60	39.7	40	50	17	9	75	23	29	1.4	0.1	22	4.79	11.3	1.67	8	2.47	0.96	3.2	0.6	3.95	0.84	2.62	0.4	2.57	0.37	1	0.07	0.32
samp. 4810A11	high-Ti	Wrangellia	47.53	1.73	14.2	11.8		10.6176		0.17	7.4	8.85	2.39	0.88	0.1	3.63	55.4045	42.6	361	138	61	45.2	79	93	18	3	228	27	85	7.3	0.4	83	6.3	16.1	2.42	11.8	3.52	1.37	4.51	0.79	4.85	0.98	2.8	0.41	2.53	0.36	2.6	0.52	0.57
samp. 4811A1	low-Ti	Wrangellia	48.78	0.89	13.61	11.54		10.3837		0.15	7.68	8.97	4.07	0.18	0.14	3.5	56.8675	52.2	354	278	78	47.6	50	52	13	25	131	20	30	1.4	0.2	46	3.84	9.1	1.42	7.1	2.24	0.88	2.83	0.5	3.26	0.68	2.06	0.31	1.93	0.28	0.9	0.06	0.13
samp. 4811A3	low-Ti	Wrangellia	48.99	0.64	15.48	8.34		7.50433		0.17	8.82	7.69	2.88	1.63	0.06	3.99	67.6909	43.2	266	337	110	45.1	27	50	11	8	610	13	19	0.9	1	519	2.16	5.3	0.85	4.7	1.41	0.61	2.01	0.36	2.26	0.47	1.43	0.21	1.37	0.2	0.6	0.04	0.08
samp. 4811A5	low-Ti	Wrangellia	46.11	0.79	15.25	11.57		10.4107		0.14	5.35	12.29	3.57	0.32	0.15	4.26	47.8096	42.9	318	158	62	38.2	122	49	17	27	42	17	23	1	0.3	10	3.02	7	1.06	5.5	1.67	0.76	2.34	0.42	2.7	0.58	1.72	0.25	1.61	0.25	0.8	0.04	0.13
samp. 4811A8	low-Ti	Wrangellia	49.89	0.71	14.8	10.35		9.31293		0.12	6.37	8.44	4.2	0.87	0.13	3.9	54.9403	40.4	293	82.7	56	37.3	20	44	14		119	21	35	1.5	1.3	147	6.08	12.4	1.64	7.5	2.14	0.88	2.77	0.5	3.16	0.66	2.02	0.3	1.92	0.29	1	0.08	0.59
samp. 4812A5	low-Ti	Wrangellia	45.74	0.56	15.79	10.74		9.66385		0.14	7.55	10.52	2.2	1.88	0.1	4.07	58.2056	38.7	234	152	133	53	44	64	14		233	16	30	1.1		273	4.56	9.8	1.34	6.4	1.82	0.7	2.2	0.42	2.76	0.57	1.72	0.26	1.66	0.25	0.9	0.06	0.44
samp. 4812A6	low-Ti	Wrangellia	50.2	0.79	13.31	11.04		9.93379		0.16	7.96	8.1	3.98	0.66	0.16	2.87	58.8205	48.3	332	127	55	45.3	20	73	12	9	210	24	39	1.7	1.5	154	6.17	14.2	1.99	9.2	2.53	0.98	3.44	0.63	4.05	0.87	2.7	0.41	2.64	0.39	1.3	0.08	0.59
samp. 4816A2(1)	high-Ti	Wrangellia	48.48	1.65	14.38	11.36		10.2217		0.15	6.86	8.41	4.23	0.06	0.11	3.54	54.4694	39.8	333	200	71	42.2	202	74	17	8	55	23	84	7.4	0.2	21	6.66	16.6	2.46	12	3.44	1.31	4.2	0.73	4.45	0.88	2.55	0.37	2.24	0.31	2.5	0.51	0.58
samp. 4816A2(2)	high-Ti	Wrangellia	48.39	1.68	14.29	11.34		10.2037		0.15	6.84	8.48	4.22	0.04	0.21	3.5	54.4407	45.3	338	222	68	44.9	197	73	16	2	56	23	84	7.2	0.2	22	6.39	16.2	2.36	11.7	3.34	1.28	4.18	0.72	4.31	0.85	2.4	0.35	2.15	0.3	2.4	0.52	0.62
samp. 4816A3	high-Ti	Wrangellia	47.47	1.65	15.17	11.41		10.2667		0.17	6.32	9.83	2.75	0.44	0.09	3.57	52.3202	33.9	327	100	97	44.4	181	74	17	22	280	22	80	7.1	0.2	78	6.43	16	2.32	11.3	3.06	1.28	3.71	0.66	4.05	0.8	2.32	0.33	2.02	0.28	2.4	0.66	0.59
samp. 4816A4	low-Ti	Wrangellia	49.18	0.53	14.07	9.7		8.72806		0.21	8.4	10.34	3.37	0.08	0.03	3.8	63.1755	45.4	243	597	125	50.7	96	51	13	18	55	18	33	1.7	0.7	72	2.9	6.2	0.86	4.2	1.27	0.53	2	0.41	2.84	0.63	1.92	0.31	1.98	0.28	1	0.1	0.58
samp. 4816A5A(1)	low-Ti	Wrangellia	49.62	0.69	13.7	8.36		7.52233		0.14	9.6	10.25	1.99	0.94	0.08	3.43	69.465	42	212	984	196	52.6	69	66	13	34	220	21	59	4.7	0.9	399	7.83	16.1	2.05	8.8	2.27	0.72	2.92	0.57	3.56	0.75	2.39	0.37	2.4	0.35	1.8	0.31	1.57
samp. 4816A5A(2)	low-Ti	Wrangellia	48.99	0.7	13.59	9.3		8.36814		0.14	9.56	10.23	1.99	0.93	0.08	3.39	67.0671	46.8	215	1010	191	51.9	68	67	13	35	220	22	63	4.9	0.8	393	7.62	16.1	2.04	8.8	2.23	0.74	2.89	0.54	3.5	0.77	2.34	0.36	2.34	0.34	1.7	0.31	1.73
samp. 4816A7(1)	low-Ti	Wrangellia	49.23	0.56	13.73	9.43		8.48511		0.16	9.19	9.03	2.37	1.46	0.05	3.91	65.8781	44.5	225	509	44	47.6	18	65	13	14	119	17	42	3	1.2	337	4.44	9.6	1.29	5.7	1.55	0.55	2.24	0.44	2.77	0.6	1.87	0.29	1.92	0.28	1.2	0.19	0.88
samp. 4816A7(2)	low-Ti	Wrangellia	49.28	0.56	13.72	9.44		8.49411		0.16	9.17	9.01	2.4	1.49	0.06	3.91	65.8052		227						13		121	18	42	2.9	1.3	339	4.38	9.5	1.27	5.7	1.61	0.56	2.18	0.43	2.77	0.59	1.88	0.3	1.92	0.29	1.2	0.2	0.89
samp. 4816A9	low-Ti	Wrangellia	50.39	0.6	13.67	9		8.0982		0.16	7.84	9.39	3.52	0.71	0.06	4.4	63.3128	39.2	219	314	7	38.3	2	63	12		125	18	51	3.1	0.5	207	4.84	10.3	1.37	6.3	1.63	0.66	2.3	0.42	2.8	0.61	1.86	0.29	1.9	0.27	1.3	0.22	0.99
samp. 4816A11	low-Ti	Wrangellia	48.88	0.49	12.66	9.82		8.83604		0.19	8.39	9.89	3.1	0.65	0.04	5.52	62.8612	44.6	228	581	103	48.6	20	64	11	14	149	17	32	1.5	0.4	203	2.76	6.1	0.84	4.3	1.28	0.47	1.92	0.39	2.71	0.61	1.89	0.29	1.88	0.27	0.8	0.1	0.62
samp. 4820A1	high-Ti	Wrangellia	48.54	2.09	13.53	13.99		12.5882		0.23	6.07	7.92	3.72	0.43	0.2	2.81	46.2238	43.9	435	54.1	46	47	122	102	15	6	266	35	123	9.1	1.2	82	7.85	19.8	2.96	14.6	4.17	1.57	5.43	0.93	5.57	1.12	3.18	0.45	2.84	0.41	3.3	0.7	0.79
samp. 4821A1	high-Ti	Wrangellia	43.95	1.32	14.92	13.1		11.7874		0.19	9.07	10.1	2.05	0.85	0.06	3.17	57.8351	48.5	364	307	116	60.2	14	84	18	13	104	26	64	2.1	1.8	73	2.21	6.5	1.12	6.8	2.56	1.11	3.89	0.71	4.45	0.9	2.61	0.38	2.37	0.34	1.9	0.12	0.27
samp. 91-85	low-Ti	Wrangellia	49.6	0.92	16.6	9.33		8.39513		0.16	7.8	13.69	1.9	0.23	0.19	0.87	62.3524		305	309	75					1	690	17	43	2.1	0.11	43	4.73	10.4	1.71	8.62	2.57	1.09	2.62	0.49	3.16	0.65	1.91	0.26	1.66	0.26	1.08	0.14	0.39
samp. 28369	low-Ti	Wrangellia	51.6	0.94	18.2	10.36		9.32193		0.21	5.78	8.52	2.55	1.52	0.29	1.83	52.5004		259	81	38					43.1	660	21	69	3.2
samp. ATM85-34	low-Ti	Wrangellia	51.7	0.95	19.2	8.9107	4.8	8.01785	3.7	0.17	3.52	7.98	2.92	1.24	0.23		43.9019		240	21	54					14	620	19	58	4		1500
samp. ATM85-40	high-Ti	Wrangellia	52	1.12	19	9.9772	4.2	8.97748	5.2	0.2	3.54	9.28	3	0.47	0.31		41.2769		210	18	24					3	560	21	90	7		400
samp. 92-203A	low-Ti	Wrangellia	48	0.93	18.1	11.81		10.6266		0.2	7.33	11.48	1.77	0.77	0.16	1.3	55.1486		330	115	47					18.9	353	18	32	1.4	0.59	229	3.8	10.4		7.6	2.25	0.81		0.47					1.66	0.25	1.18	0.25	0.3
samp. 92-205B	low-Ti	Wrangellia	48	0.91	15	11.65		10.4827		0.21	9.48	12.83	0.78	1.4	0.15	1.52	61.7163		369	426	79					31.3	212	18	26	1.7
5617A5(2)	high-Ti	Wrangellia	47.4	1.71	13.33	12.71		11.4365		0.17	7.46	11.93	1.8	0.17	0.14	1.38	53.7632	37.7	338	255	97		160	76	19	7	254	23	86	8.5	0.2	37	7.94	19.2	2.85	13.3	3.77	1.43	4.32	0.75	4.25	0.81	2.31	0.342	2.14	0.298	2.5	0.6	0.57
79-Dostal	low-Ti	Wrangellia	46.73	0.99	15	9.8369	1.06	8.85379	7.9	0.16	9.1	12.51	1.41	0.28	0.07	1.53	64.6912		274	595	198		59		18	9	236	15	58			80	4.13	10.6	1.55	7.73	2.39	0.85	2.74	0.44	3.01	0.57	1.58	0.22	1.39	0.21	1.6	0.32	0.41
28-Dostal	high-Ti	Wrangellia	49.52	1.62	14.32	12.866	5.9	11.5788	6.27	0.21	6.08	12.23	1.8	0.16	0.12	0.81	48.3479	39	332	153	69		164		20		218	21	101	8		97	6.62	16.74	2.42	11.61	3.36	1.25	4.12	0.61	4.13	0.82	2.28	0.32	2.01	0.32	2.8	0.5	0.67
15-Dostal	high-Ti	Wrangellia	49.57	1.51	14.48	13.132		11.82	11.82	0.2	7.25	12.28	2.1	0.18	0.11	0.58	52.2303	43.4	351	352	110		177		20		210	21	88	10		39	7.51	17.47	2.48	11.73	3.4	1.21	3.95	0.6	4.29	0.88	2.5	0.31	2.12	0.32	2.51	0.56	0.6
samp. FL-3	low-Ti	Galapagos	46.25	1.19	14.27	9.96588	2.1	8.96958	7.08	0.18	12.62	10.54	2.57	1.09	0.21		71.4942			267	372					21	514		61
samp. FL-13	low-Ti	Galapagos	45.78	1.66	14.44	10.7926	3.36	9.71333	6.69	0.18	12.96	10.75	2.82	0.87	0.26		70.4003			226	377					21	391		84
samp. FL-14	low-Ti	Galapagos	47.27	1.3	15.7	10.3682	3.78	9.33124	5.93	0.18	8.58	12.17	2.79	0.94	0.23		62.1079	31		557	164					21	393		70			328	13.1	20.8			2.7	1		0.5					1.9	0.3	1.6	0.9	1.2
samp. FL-15	low-Ti	Galapagos	48	1.39	16.19	11.7581	4.07	10.5822	6.92	0.21	7.81	9.13	3.42	1.25	0.35		56.8147	25		569	118					34	523		140			514	47.5	69.4			4.6	1.4		0.6					2.3	0.5	3.2	3.4	5.8
samp. FL-16	low-Ti	Galapagos	47.74	1.38	15.18	10.7847	2.43	9.70651	7.52	0.2	10.21	10.27	3.17	0.92	0.27		65.218	29		297	282					24	451		110			0	33.4	61.5			3.7	1.2		0.5					2.1	0.4	2.5	2.4	3.7
samp. FL-20	low-Ti	Galapagos	46.06	1.69	14.51	10.9783	4.79	9.88004	5.57	0.19	11.27	10.6	3.12	0.97	0.28		67.0333	30			276					21	501		89			273	21.6	33.5			3.2	1.1		0.5					2	0.4	1.8	1.6	2
samp. FL-23	low-Ti	Galapagos	46.5	1.76	15.47	11.466	4.9	10.319	5.91	0.2	9.5	10.71	3.37	0.75	0.34		62.137			726	210					21	457		121
samp. FL-24	low-Ti	Galapagos	48.22	1.8	15.58	10.7381	3.05	9.66439	6.92	0.18	8.93	9.54	3.1	0.96	0.31		62.2232			642	225					24	542		123
samp. FL-29	low-Ti	Galapagos	45.39	1.8	15.58	10.7381	3.05	9.66439	6.92	0.18	13.07	10.23	2.86	0.93	0.22		70.6809	32		912	354					20	427		62			462	12.4	20.1			2.6	0.9		0.4					1.8	0.3	1.5	0.9	1
samp. FL-30	low-Ti	Galapagos	46.39	1.65	14.55	10.718	1.63	9.64667	8.18	0.17	12.62	11.26	2.54	0.76	0.25		69.9881	33			359					19	382		82			274	13.6	21.4			3	1		0.5					1.8	0.4	0	1	1.4
samp. FL-33	low-Ti	Galapagos	47.42	1.17	14.89	10.138	1.55	9.12469	7.73	0.17	12.72	10.49	2.65	0.65	0.22		71.3052	38			341					16	353		73			626	11				2.7	0.8		0.5					1.9	0.44
samp. FL-48	low-Ti	Galapagos	46.82	1.62	14.98	10.2369	1.36	9.21373	7.99	0.19	11.41	10.57	2.58	0.92	0.22		68.823				267					20	438		89
samp. FL-53	low-Ti	Galapagos	46.61	1.21	14.82	10.6968	1.42	9.62772	8.35	0.2	11.8	10.59	2.76	0.9	0.19		68.6007				308					14	483		64
samp. FL-59	low-Ti	Galapagos	47.38	1.18	14.63	9.74471	1.29	8.77074	7.61	0.18	12.35	9.68	3.15	1.12	0.23		71.5103				380					27	457		88
samp. FL-63	low-Ti	Galapagos	47.6	1.21	15.06	9.72249	1.29	8.75074	7.59	0.18	11.46	9.82	3.36	1.22	0.25		70.0103				320					25	322		85
samp. FL-82	low-Ti	Galapagos	47.57	1.08	14.98	10.2813	1.36	9.25373	8.03	0.19	11.3	10.45	3.21	0.97	0.19		68.5214				336					28	405		77
samp. FL-85	low-Ti	Galapagos	46.46	1.56	14.84	10.6535	1.41	9.58872	8.32	0.19	12.68	10.43	2.75	0.82	0.19		70.2139			427	339					17	392		85
samp. CH-1	low-Ti	Galapagos	47.38	1.28	15.56	9.76706	2.59	8.79048	6.46	0.18	10.92	9.99	3.19	1.03	0.25		68.8902	35			229					27	401		94
samp. FL-25	low-Ti	Galapagos	46.5	1.52	15.55	11.1769	2.8	10.0594	7.54	0.19	9.98	12.31	2.46	0.26	0.15		63.8794	36		369	212					8	300		60			130	9	15.6			2.7								1.7	0.4	1.4		0.6
samp. FL-26	low-Ti	Galapagos	46.48	1.46	15.73	11.268	2.38	10.1415	8	0.18	10.16	12.25	2.3	0.18	0.13		64.1041				188					5	246		57			111	7.8	14.5			2.6	1		0.5					2.1	0.3	1.3	0.6	0.6
samp. FL-27	low-Ti	Galapagos	48.3	1.76	16.85	9.80603	3.44	8.82531	5.73	0.17	7.11	11.76	3.42	0.76	0.27		58.951	34		24	84					20	336		92
samp. FL-28	low-Ti	Galapagos	47.16	1.82	16.44	11.1002	1.89	9.99062	8.29	0.17	7.88	11.93	3.04	0.58	0.25		58.4371	41		1250	116					13	338		116			190	10.1	15.6			3.1	1.1		0.5					2.1	0.4	2.4	0.8	1.1
samp. FL-78	low-Ti	Galapagos	46.2	1.52	14.2	10.6313	1.41	9.56872	8.3	0.19	13.77	10.65	2.25	0.53	0.18		71.9515	34			428					10	322		83				10.4				3.2	1							1.6	0.48
samp. SN91-30	high-Ti	Galapagos	49.38	3.4	13.72	14.3874		12.95		0.21	5.55	10.1	3.32	0.65	0.42		43.3095			61	27			128	21	13	308	46	201	37	0.14	150	24.8	54	6.9	31.8	8.78	2.9	8.6	1.51	8.9	1.78	4.8	0.62	3.69	0.56	5.3	1.7	1.9
samp. SN91-32	high-Ti	Galapagos	48.36	3.96	13.14	16.2428		14.62		0.23	5.08	9.56	3.38	0.7	0.46		38.2485			37	19			141	22	12	296	40	227	34	0.14	137	22.2	47.9	6.1	28.1	7.68	2.6	7.5	1.35	8.1	1.58	4.2	0.54	3.29	0.49	4.9	1.7	1.8
samp. SN91-35	high-Ti	Galapagos	48.6	3.52	14.2	14.7874		13.31		0.21	5.86	10.59	3.12	0.43	0.36		43.9719			88	29			123	24	7	305	38	190	28	0.09	118	19.6	42.9	5.7	26.3	7.39	2.5	7.2	1.28	7.6	1.53	4	0.52	3.15	0.48	4.4	1.2	1.5
samp. SN92-12	high-Ti	Galapagos	49.18	3.43	13.77	14.1986		12.78		0.21	5.7	10.46	3.13	0.57	0.37		44.2912			92	32			119	23	10	305	37	189	27	0.11	113	18.6	40.9	5.4	24.6	7.04	2.4	7.3	1.25	7.4	1.41	3.9	0.48	2.93	0.43	4.6	1.8	1.4
samp. SN91-36	high-Ti	Galapagos	48.52	4.03	13.2	16.4539		14.81		0.23	5.08	9.52	3.32	0.66	0.46		37.9439			37	17			145	23	12	293	46	228	32	0.13	151	25	55.5	7	32.3	8.85	3	8.7	1.53	9.3	1.8	4.9	0.62	3.7	0.57	5.1	1.3	1.9
samp. SN91-37	high-Ti	Galapagos	49.25	3.02	13.81	13.5875		12.23		0.2	6.36	11.08	3.04	0.48	0.3		48.1059			90	40			108	23	9	300	32	162	23	0.1	96	15.7	34.3	4.5	20.7	5.93	2.1	6	1.05	6.2	1.19	3.2	0.41	2.5	0.38	3.8	1.5	1.2
samp. SN92-08	high-Ti	Galapagos	48.85	3.83	13.25	15.1652		13.65		0.22	5.24	9.66	3.29	0.66	0.46		40.6283			64	23			135	23	12	297	44	220	34	0.13	139	23.7	51.6	6.6	30.1	8.3	2.8	8.4	1.47	8.6	1.68	4.5	0.59	3.48	0.53	5.4	2.3	1.8
samp. SN92-10	high-Ti	Galapagos	48.62	3.56	13.57	14.4763		13.03		0.21	5.72	10.32	3.2	0.54	0.37		43.9			79	31			119	25	10	300	38	191	29	0.11	118	19.7	43.2	5.7	26	7.43	2.6	7.5	1.29	7.7	1.49	4	0.52	2.94	0.46	4.7	1.9	1.5
samp. SN92-20A	high-Ti	Galapagos	48.09	3.54	13.72	14.2986		12.87		0.22	5.71	10.47	3.14	0.62	0.4		44.1613
samp. SN91-01	high-Ti	Galapagos	49.54	3.89	13.29	15.6873		14.12		0.24	4.58	8.89	3.74	0.84	0.65		36.6368			36	9			145	25	10	301	38	284	29	0.12	121	20.3	44.6	5.7	26.2	7.16	2.5	7.1	1.27	7.6	1.48	4	0.51	3.09	0.46	4.5	1.4	1.7
samp. SN91-05	high-Ti	Galapagos	49.25	3.29	13.73	14.3097		12.88		0.21	5.86	10.39	3.18	0.55	0.35		44.7825			84	36			119	23	15	294	57	191	49	0.16	194	34.2	73.4	9.4	42.5	11.2	3.6	11	1.88	11	2.21	5.9	0.77	4.68	0.7	6.8	2.5	2.7
samp. SN91-15	high-Ti	Galapagos	48.75	3.44	13.62	14.9652		13.47		0.21	5.49	10.29	3.18	0.64	0.4		42.0804
samp. SN91-22	high-Ti	Galapagos	48.47	3.86	13.5	15.4318		13.89		0.22	5.26	9.91	3.35	0.65	0.43		40.3001
samp. SN91-51	high-Ti	Galapagos	49.1	2.64	14.66	12.4321		11.19		0.18	6.89	11.83	2.86	0.43	0.27		52.3262			229	63			103	22	7	293	30	155	21	0.06	100	15.9	34.4	4.5	20.6	5.81	2	5.6	1.01	6.1	1.2	3.2	0.41	2.46	0.37	3.4	1	1.3
samp. SN91-53	high-Ti	Galapagos	48.4	4.04	13.09	16.1873		14.57		0.23	4.98	9.33	3.36	0.65	0.48		37.8605			34	20			144	27	13	302	47	238	36	0.14	147	24.9	54.3	7	31.8	8.72	3	8.7	1.52	9	1.73	4.8	0.62	3.66	0.56	5.7	2.4	1.9
samp. SN91-60	high-Ti	Galapagos	48.15	3.38	14.19	14.3986		12.96		0.2	5.69	10.61	3.17	0.51	0.34		43.9031			94	31			123	20	7	303	37	186	28	0.1	117	18.9	41.4	5.5	25.2	7.13	2.5	7	1.23	7.4	1.46	4	0.5	3.08	0.46	4.3	1.5	1.5
samp. SN92-02	high-Ti	Galapagos	48.42	3.63	13.51	14.643		13.18		0.22	5.67	10.29	3.06	0.55	0.4		43.4025			85	33			121	20	10	306	40	203	30	0.11	126	21	45.4	6	27.9	7.76	2.6	7.5	1.34	7.9	1.53	4	0.54	3.16	0.48	4.8	2	1.4
samp. SN91-07	high-Ti	Galapagos	49.46	3.66	13.55	15.3318		13.8		0.23	4.91	9.36	3.55	0.7	0.48		38.8094
samp. SN91-10	high-Ti	Galapagos	49.55	3.76	13.59	15.5651		14.01		0.23	4.39	8.95	3.63	0.75	0.65		35.8385			27	4			148	26	14	313	53	259	45	0.17	168	30.1	66.4	8.6	39.8	10.8	3.5	10	1.79	11	2.08	5.4	0.7	4.25	0.65	6.2	2.2	2.4
samp. SN91-29	high-Ti	Galapagos	48.31	3.87	13.39	15.3651		13.83		0.22	5.38	10.03	3.35	0.64	0.41		40.9487
samp. SN91-40	high-Ti	Galapagos	48.09	3.66	13.53	15.0207		13.52		0.22	5.64	10.35	3.31	0.61	0.42		42.6481			79	29			125	23	11	308	41	203	33	0.12	129	21.2	46.3	6.1	28.2	7.68	2.6	7.5	1.35	8.1	1.57	4.2	0.54	3.27	0.48	4.8	1.6	1.6
samp. SN91-41	high-Ti	Galapagos	48.23	3.61	13.69	14.9874		13.49		0.21	5.84	10.42	3.32	0.58	0.39		43.5572
samp. SN92-01	high-Ti	Galapagos	49.29	2.98	13.97	13.3431		12.01		0.19	6.43	11.07	2.94	0.44	0.29		48.8327			160	51			107	22	8	294	32	158	22	0.1	96	16	34.6	4.6	21.2	6.14	2.2	6.3	1.09	6.4	1.25	3.3	0.42	2.51	0.39	3.8	1.5	1.1
samp. SN92-06	high-Ti	Galapagos	48.3	3.91	13.13	15.2318		13.71		0.22	5.41	10.11	3.41	0.58	0.38		41.2943
samp. SN92-16	high-Ti	Galapagos	48.06	3.99	13.16	15.9206		14.33		0.22	5.35	9.91	3.17	0.6	0.39		39.9585
samp. SN91-12	high-Ti	Galapagos	48.56	4.26	12.98	16.4317		14.79		0.24	4.84	9.25	3.48	0.72	0.48		36.8426			29	14			144	27	14	299	47	247	40	0.16	157	26.4	57.6	7.4	34.1	9.27	3.1	8.8	1.59	9.5	1.88	5	0.66	3.95	0.6	5.8	1.9	2.2
samp. SN91-26	high-Ti	Galapagos	48.21	3.61	14.41	14.5652		13.11		0.21	5.39	10.54	3.21	0.56	0.35		42.2928			72	26			123	22	11	316	37	189	30	0.12	124	20.3	43.7	5.7	26.1	7.11	2.5	6.9	1.22	7.4	1.45	3.9	0.5	3.05	0.46	4.4	1.4	1.6
samp. SN92-05	high-Ti	Galapagos	48.2	3.94	13.18	15.5096		13.96		0.22	5.43	10.09	3.18	0.59	0.38		40.9461			55	27			132	22	11	301	38	201	28	0.13	124	20.8	45.3	5.8	27.3	7.66	2.6	7.5	1.29	7.8	1.52	4.1	0.54	3.13	0.47	4.3	1.9	1.5
samp. SN92-07B	high-Ti	Galapagos	48.66	4.16	13.01	15.4873		13.94		0.23	5.27	9.84	3.32	0.63	0.42		40.2594			72	30			131	26	12	294	42	220	33	0.13	128	21.6	47.8	6.2	29	8.03	2.7	8	1.38	8.4	1.58	4.3	0.55	3.25	0.5	5.2	2.1	1.7
samp. G86-2	low-Ti	Galapagos	47.56	1.32	15.98	10.7094	5.01	9.638	5.13	0.22	8.48	10.08	3.37	0.79	0.4		61.0654
samp. G86-3	low-Ti	Galapagos	46.87	1.21	14.46	10.0859	2.12	9.07758	7.17	0.18	12.79	10.68	2.6	1.11	0.81		71.5229			330	197	59				10.1	384	31				108.9	15.73	34.9	4.57	19.66	4.62	1.52	5.18	0.93	5.36	1.11	2.99	0.45	2.78	0.425
samp. E-41	high-Ti	Galapagos	48.37	2.8	15.49	12.2935	2.75	11.0645	8.59	0.18	6.72	11.6	2.77	0.42	0.05		51.9843
samp. FL-3	low-Ti	Galapagos	46.14	1.19	14.23	9.93366	2.09	8.94058	7.06	0.18	12.59	10.51	2.56	1.08	1.1		71.5117				372					20	505		61		0.152	620	14.9	26.3		11.4	2.49	0.88	2.87		3.07		1.9		1.79	0.283
samp. E-134	high-Ti	Galapagos	47.84	3.19	13.42	13.7915	6.97	12.4116	6.14	0.1	6.21	11.56	2.63	0.29	0.21		47.1429				65					4.56	294				0.055	50.2		22.9		15.1	4.08	1.59	4.5		4.52		2.44		2.08
samp. E-152	high-Ti	Galapagos	48.1	2.67	16.01	11.4492	3.45	10.3043	7.2	0.17	6.32	11.48	2.87	0.42	0.32		52.229			207	85	54				6	424					52.7	14.14	36.8	5.27	22.97	5.98	2.05	6.39	1.13	5.87	1.16	2.91	0.42	2.48	0.368
samp. E-242	high-Ti	Galapagos	49.47	3.02	12.42	13.5157	3.85	12.1642	8.7	0.19	6.24	11.27	2.97	0.53	0.31		47.7651			65	59	42				5.05	362	29.5				55.8	14.23	36.2	5.19	23.55	5.99	2.02	6.62	1.1	5.81	1.13	2.82	0.42	2.44	0.367
samp. E-56	high-Ti	Galapagos	47.2	3.35	15.24	12.8546	3.5	11.5693	8.42	0.17	6.37	10.45	3.11	0.78	0.4		49.5327			207	85	54				11.8	374				0.059	171.2	21	48.4		28.7	6.96	2.37	7.18		6.37		3.25		2.7	0.398
samp. CA89-2	high-Ti	Galapagos	47.88	2.31	16.23	11.3836	3.34	10.2453	7.24	0.16	6.37	12.48	2.81	0.51	0.28		52.5688
samp. SN-1	high-Ti	Galapagos	49.24	2.85	13.77	14.2077	2.32	12.7875	10.7	0.21	5.58	10.3	3.1	0.57	0.42		43.7524			93	52	47				13.4	295	34.4				125.7	19.55	45.3	6.34	27.92	7.03	2.24	7.34	1.28	6.93	1.35	3.57	0.51	3.11	0.455
samp. E-169	low-Ti	Galapagos	48.65	1.36	16.25	11.4403	3.03	10.2964	7.57	0.18	8.09	12.01	2.64	0.11	0.1		58.3437			194	87	61				0.325	135				0.002	7.2	2.04	7.25		7.59	2.73	1.08	3.85		4.53		2.82		2.64	0.398
samp. M-34	high-Ti	Galapagos	49	2.67	14.57	13.8767	3.5	12.4893	9.34	0.21	5.78	10.85	3.43	0.35	0.13		45.2047
samp. P-42	high-Ti	Galapagos	49.71	2.41	15.3	11.739	2.14	10.5656	8.64	0.18	6.41	11.21	3.13	0.74	0.36		51.957
samp. E-165	low-Ti	Galapagos	48.87	0.69	17.72	8.1272	2.35	7.31453	5.2	0.12	8.73	12.21	2.74	0.17	0.14		68.026
samp. G86-1	low-Ti	Galapagos	47.14	1.87	15.67	12.2547	3.7	11.0293	7.7	0.2	8.62	10.42	2.94	0.35	0.26		58.2148															54.3	9.57	24.9	3.62	16.5	4.65	1.54	5.24	0.95	5.61	1.18	3.2	0.51	3.04	0.472
samp. SC-196	high-Ti	Galapagos	48.56	2.61	14.76	14.4654	2.2	13.0196	11.04	0.23	6.98	10.69	3.2	0.35	0.26		48.8667				73					4.71	252		180		0.049	62.5	10.7	27.6		19.4	5.42	1.94	6.49		6.75		3.83		3.41	0.512
samp. SC-78	low-Ti	Galapagos	46.44	1.03	15.92	11.9234	1.58	10.7317	9.31	0.19	12.36	10.73	2.28	0.08	0.08		67.2459				325					1.04	212		76		0.013	12.7	2.97	9.02		7.54	2.31	0.93	2.99		3.41		2.09		1.87	0.29
samp. G86-5	high-Ti	Galapagos	47.77	2.99	15.12	12.3583	6.77	11.1216	5.03	0.19	5.59	9.12	3.51	1.03	0.77		47.2565									13.8	338	50.9				177.1	29.21	67.1	8.95	39.01	9.63	2.86	9.91	1.73	9.25	1.82	4.67	0.69	4.07	0.623
samp. SF-13	low-Ti	Galapagos	46.72	1.9	15.6	11.9536	3.41	10.7583	7.69	0.18	9.69	10.23	3.03	0.55	0.35		61.6207			379	241	73				8.6	359	31.6				109	14.71	35.9	5.04	23	5.63	1.88	6.27	1.11	6.41	1.28	3.49	0.56	3.16	0.476
samp. BL-1	low-Ti	Galapagos	47.94	1.27	16.53	11.0026	4.17	9.90217	6.15	0.17	9.34	11.76	2.64	0.1	0.18		62.7058			256	162	54				5	198					16.2	3.51	10.2	1.67	8.6	2.58	1.01	3.49	0.63	3.87	0.82	2.3	0.35	2.19	0.342
samp. JH-86	low-Ti	Galapagos	46.46	1.26	16	11.1381	2.95	10.0244	7.37	0.18	10.79	11.97	2.28	0.06	0.1		65.7384									1.55	221	19.7				16.3	3.06	9.19	1.55	8.17	2.5	0.97	3.27	0.59	3.58	0.75	2.05	0.32	1.97	0.296
samp. SH-7	high-Ti	Galapagos	47.26	2.42	15.4	13.5912	3.17	12.2324	9.38	0.21	7.58	11.26	3.24	0.31	0.27		52.4852			187	104	52				7	276		155			42.3	8.19	21.9	3.31	16.44	4.55	1.65	5.71	0.99	5.84	1.21	3.28	0.49	3.09	0.477
samp. W90-4	low-Ti	Galapagos	49.09	1.13	15.23	11.9228	6.09	10.7298	5.25	0.18	6.5	12.19	2.95	0.29	0.48		51.9201
samp. DA-2	low-Ti	Galapagos	49.91	1.52	15.26	10.4941	7.45	9.44351	2.74	0.19	7.3	12.4	2.9	0.32	0.2		57.9473
samp. E87-3	high-Ti	Galapagos	47.3	2.61	14.28	13.4501	3.24	12.1054	9.19	0.17	7.83	10.18	3.07	0.45	0.26		53.5535
samp. E-156	high-Ti	Galapagos	44.19	2.21	11.45	13.9756	3.21	12.5784	9.69	0.19	16.98	7.47	2.32	0.64	0.32		70.6433
samp. PS-16	low-Ti	Galapagos	47.85	1.78	15.79	11.7405	6.13	10.5658	5.05	0.19	7.86	11.37	2.56	0.27	0.28	0.23	57.0093	32.4		292	160	47.3					276		128				8.9	23			4.08	1.54		0.7					2.25	0.35	3	0.71	0.78
samp. DH-8B	high-Ti	Galapagos	48.84	3.4	13.27	16.0655	4.3	14.4591	10.59	0.23	4.87	9.15	3.23	0.62	0.41	0.79	37.5154	35		28		43				12	288		249			110	18.5	44			8.4	2.65		1.46					4	0.55	6	1.56	2.03
samp. DH-6B	high-Ti	Galapagos	48.26	3.61	15.22	14.4901	3.88	13.0412	9.55	0.2	4.31	10.07	3.21	0.69	0.38	0.06	37.0724	29.9		28		37.9											16.8	40			7.7	2.56		1.21					3.4	0.52	5.8	1.63	1.77
samp. DH-6H	high-Ti	Galapagos	46.63	4.4	11.93	17.4133	5.57	15.6719	10.66	0.25	4.7	9.97	3.23	0.81	0.5	0.48	34.8363	40.3		35		45				12	273		294			160	22.3	56			9.4	3.2		1.82					4.7	0.65	7.6	2.09	2.37
samp. JL1	high-Ti	Galapagos	46.63	2.5	16.11	13.24		11.9134		0.2	7.51	10.04	3.24	0.49	0.29		52.9127
samp. JL62	low-Ti	Galapagos	55.38	1.67	16.45	10.1		9.08798		0.21	1.97	5.11	5.2	2.32	0.69		27.8713
samp. 31	low-Ti	Galapagos	46.21	1.77	16.22	11.1758	2.11	10.0586	8.16	0.16	9.18	10.99	2.38	0.3	0.18		61.932
samp. 102	low-Ti	Galapagos	46.99	1.73	16.62	10.6769	2.2	9.60956	7.63	0.17	10.75	10.6	2.59	0.45	0.21		66.6014
samp. 111	low-Ti	Galapagos	46.28	1.42	16.46	11.8547	3	10.6694	7.97	0.29	9.62	11.41	2.29	0.13	0.09		61.6455
samp. 56	high-Ti	Galapagos	47.2	3.35	15.24	12.8546	3.5	11.5693	8.42	0.17	6.37	10.45	3.11	0.7	0.4		49.5327	33	280	210	68	46	100				220	34	175	22		92	12.5				4.8
samp. 87	high-Ti	Galapagos	48.46	3.05	14.96	12.8445	2.59	11.5605	9.23	0.21	6.38	11.58	2.26	0.88	0.29		49.591
samp. 4	high-Ti	Galapagos	48.1	2.88	14.68	12.3334	2.19	11.1006	9.13	0.2	6.65	11.21	3.6	0.71	0.37		51.6415	36	250	23	54	51	135				270	35	200	34		165	20				6.3										3.2
samp. 5	high-Ti	Galapagos	47.52	2.7	14.91	12.1858	3.52	10.9673	7.8	0.21	6.7	11.28	3.48	0.69	0.41		52.13
samp. 8	high-Ti	Galapagos	48.49	2.74	15.43	11.8556	1.69	10.6707	9.15	0.17	6.67	11.4	3.02	0.8	0.32		52.702
samp. 1	high-Ti	Galapagos	46.14	2.01	16.1	12.3368	2.26	11.1035	9.07	0.19	10.43	9.19	3.64	0.28	0.24		62.6091	26	120	340		67	79				278	29	188	34		48	8.1				4										3.2
samp. 20	high-Ti	Galapagos	47.16	2.28	15.15	13.0433	1.4	11.7397	10.48	0.16	9.89	9.47	2.88	0.79	0.27		60.0275
samp. 24	high-Ti	Galapagos	45.12	2.07	15.48	11.9379	1.85	10.7446	9.08	0.19	11.57	10.89	2.92	0.18	0.13		65.7477
samp. 68B	high-Ti	Galapagos	47.96	3.29	15.03	13.6957	3.63	12.3263	9.06	0.2	5.87	9.87	3.19	0.68	0.43		45.9138
samp. 76	low-Ti	Galapagos	45.8	1.73	13.99	12.8833	1.64	11.5957	10.12	0.17	14.39	9.14	2.91	0.24	0.15		68.8682
samp. 103	high-Ti	Galapagos	46.95	2.22	16.58	11.0359	3.37	9.93233	6.9	0.16	8.37	10.64	3.14	0.74	0.32		60.035
samp. 110	high-Ti	Galapagos	45.51	2.14	15.06	11.5681	3.88	10.4112	6.92	0.17	11.07	9.46	3.4	1.14	0.36		65.4622	29	200	540		64	78				305	30	122	26		330	16.2				3.2										2.2
samp. 2	low-Ti	Galapagos	46.72	1.96	14.1	12.8389	2.14	11.5556	9.63	0.14	11.64	10.92	1.83	0.3	0.34		64.2296
samp. 3	high-Ti	Galapagos	47.8	2.4	18.31	10.5802	1.47	9.52271	8.2	0.14	4.89	13	2.48	0.57	0.41		47.7909
samp. 4	high-Ti	Galapagos	48.65	2.1	17.5	11.0823	0.25	9.97495	9.75	0.25	6.61	11.85	2.15	0.38	0.21		54.1546
samp. 78	high-Ti	Galapagos	47.84	3.79	14.75	13.7313	5.01	12.358	7.85	0.19	5.21	9.22	3.63	0.61	0.43		42.9067	30	280	82	52	47	92				280	44	250	26		120	16.4				7.5										6.7
samp. 79	high-Ti	Galapagos	48.12	3.91	14.13	14.1646	4.21	12.7482	8.96	0.19	5.51	9.59	3	1.27	0.46		43.5177
samp. 45	high-Ti	Galapagos	48.77	3.98	14.52	14.6012	4.38	13.1411	9.2	0.22	4.66	8.72	3.29	0.79	0.55		38.7302
samp. 65	high-Ti	Galapagos	48.54	4.2	14.49	14.8468	4.67	13.3621	9.16	0.16	4.68	8.22	3.68	0.84	0.47		38.4366
samp. 44	high-Ti	Galapagos	48.74	3.72	14.47	14.9278	3.74	13.4353	10.07	0.17	4.01	8.62	4.3	0.99	0.7		34.7278	26	230	183	12	41	552				265	60	390	37		170	31.3				10.7										8.6
samp. 81	high-Ti	Galapagos	49.2	3.34	14.24	14.7634	3.92	13.2872	9.76	0.17	3.86	7.97	4.45	1.36	0.92		34.1173
samp. 68	high-Ti	Galapagos	49.81	3.42	13.4	15.8858	7.22	14.2966	7.8	0.24	3.61	7.92	4.2	0.88	0.59		31.0401
samp. JL-74	low-Ti	Galapagos	46.8	1.84	16.22	11.5835	1.84	10.4256	8.77	0.19	8.18	12.47	2.36	0.07	0.11	0.35	58.3094
samp. JL-122	low-Ti	Galapagos	47.06	1.37	16.71	11.1158	2.65	10.0045	7.62	0.18	9.5	12.52	2.45	0.03	0.07		62.8625
samp. JH-86	low-Ti	Galapagos	46.46	1.26	16	11.1381	2.95	10.0244	7.37	0.18	10.79	11.97	2.28	0.06	0.1	0.27	65.7384
samp. JH115	low-Ti	Galapagos	46.87	1.43	16.42	11.5981	3.81	10.4382	7.01	0.18	9.52	11.74	2.38	0.15	0.12	0.06	61.916
samp. F-13-72	high-Ti	Galapagos	44.8	2.12	17.1	13.2209		11.9		0.14	7.36	8.72	2.79	0.5	0.39	2.84	52.4377	32	180	291	187	56				3	375	20	130	5		48	8.5	24		18	5	2	6.1	0.95					3	0.38	4.5	0.57	0.8
samp. F-16-72	high-Ti	Galapagos	46	2.13	16.5	13.4431		12.1		0.14	8.87	8.49	2.53	0.3	0.32	1.35	56.6487	32	171	305	209	58				2	470	20	180	12		82	10	23		15	5.4	2.2	6.4	1					3.2	0.45	5.5	1.03	0.9
samp. G192-1	low-Ti	Galapagos	47.32	1.712	16.09	11.7433		10.57		0.171	10.52	9.81	3.07	0.22	0.254		63.9529	30	198	406	236		66	73	18	2	374	26	158	6.2	0.03	34	7.92	50	3	14.62	4.37	1.64	4.48	0.84	5.17	1.04	2.9	0.4	2.38	0.38	3.37	0.36	0.37
samp. G192-4	low-Ti	Galapagos	47.35	1.281	16.08	11.5433		10.39		0.164	11.44	10.85	2.47	0.15	0.16		66.2473	34	199	454	234		63	71	19	2	298	21	93	5.7	0.01	22	4.46	19	1.78	8.76	2.93	1.14	3.22	0.6	3.87	0.78	2.24	0.3	1.86	0.28	1.94	0.22	0.22
samp. G192-10	high-Ti	Galapagos	48.16	3.71	13.9	15.1318		13.62		0.222	5.28	9.85	3.57	0.78	0.431		40.865	30	422	46	27		51	124	26	16	374	39	226	40	0.15	178	26.23	60	7.23	32.02	8.57	2.85	8.01	1.41	8.33	1.61	4.42	0.56	3.39	0.5	5.55	2.39	2.06
samp. SG93-22	low-Ti	Galapagos	46.55	1.671	14.44	10.8989		9.81		0.17	13.34	10.63	2.67	0.83	0.219		70.7946	33	247	698	324		76	68	13	20	390	21	91	23.5	0.23	279	15.96	18	3.04	12.45	3.24	1.18	3.5	0.64	4.03	0.82	2.34	0.32	1.96	0.32	1.8	1.22	1.3
samp. SG93-23	low-Ti	Galapagos	47.19	1.275	14.06	10.1768		9.16		0.164	13.56	10.81	2.79	0.89	0.223		72.5188	33	233	1035	346		95	64	13	20	372	19	83	24	0.19	416	16.42	36	2.89	11.08	2.74	0.95	2.85	0.52	3.32	0.68	2.03	0.27	1.68	0.26	1.58	1.3	1.44
samp. R9520B	high-Ti	Galapagos	47.49	2.76	15.11	12.8321		11.55		0.17	9.42	9.39	3.46	0.74	0.41		59.2477	26	224	332	211					13	402	23	142	20.1		172
samp. R9520A	high-Ti	Galapagos	47.17	2.75	15.29	12.7209		11.45		0.16	9.21	9.83	3.54	0.72	0.42		58.9128	27	217	329	193					10	429	27	175	25.2		165
samp. R9511	high-Ti	Galapagos	47.89	2.91	15.78	11.8433		10.66		0.16	8.7	9.79	3.59	0.73	0.47		59.264	28	259	276	182					12	410	24	154	20.7		176
samp. R958	high-Ti	Galapagos	48.15	3	16.36	11.8544		10.67		0.13	6.08	9.44	3.62	0.89	0.43		50.3908	25	268	257	139					12	412	24	164	22.6		165
samp. R957	high-Ti	Galapagos	48.21	3.34	16.02	11.5988		10.44		0.18	6.06	9.69	3.63	0.83	0.48		50.8531	28	318	145	56					13	395	21	139	19.2		214
samp. R9510	high-Ti	Galapagos	49.18	3.39	16.25	11.4544		10.31		0.15	5.65	10.34	4.23	0.9	0.54		49.4151	30	309	149	58					14	422	38	245	33.6		218
samp. R9518	high-Ti	Galapagos	48.98	3.47	16.32	11.6544		10.49		0.16	5.59	10.36	4.14	0.91	0.53		48.7158	27	325	129	61					10	420	34	238	32.1		232
samp. R956	high-Ti	Galapagos	49.06	3.36	16.77	10.8767		9.79		0.15	5.42	10.17	3.84	0.89	0.55		49.6699	35	305	133	64					14	431	30	198	27.3		221
samp. R9519	high-Ti	Galapagos	49.51	3.29	17.21	10.4323		9.39		0.13	5.02	10.22	3.82	0.94	0.54		48.7964	27	301	148	69					12	506	29	197	27.6		218
samp. CA-3	high-Ti	Galapagos	48.36	3.43	14.62	14.0986		12.69		0.21	5.48	10.28	3.74	0.79	0.42		43.4959	32	422	59	31		76	111		16.23	395.93	37.51	212	38.71	0.16	187.69	26.46	55.14	6.83	29.94	7.85	2.63	7.87	1.27	7.45	1.46	3.86	0.5	3	0.45	5.48	4.3	2
samp. CA-4	high-Ti	Galapagos	49.52	3.17	15	12.3321		11.1		0.2	5.76	10.4	3.67	0.77	0.41		48.0524	30	377	51	40		70	107		15.03	352.76	36.11	207	117.36	0.12	172.96	24.42	52.3	6.57	29.69	7.48	2.59	7.75	1.26	7.38	1.42	3.86	0.52	3	0.45	5.64	176.55	1.84
samp. CA-26	high-Ti	Galapagos	49.69	3.73	13.9	14.7763		13.3		0.22	4.7	8.98	3.9	0.96	0.51		38.6479	34	408	24	17		46	128		19.41	361.11	47.79	268	46.48	0.21	198.28	30.84	66.01	8.23	36.84	9.62	3.15	9.84	1.59	9.31	1.82	4.94	0.64	3.81	0.58	6.97	5	2.6
samp. CA-30	high-Ti	Galapagos	49.19	3.05	14.63	13.1431		11.83		0.21	6.17	10.88	3.39	0.67	0.35		48.1789	42	382	69	45		75	113		13.44	355.44	34.7	183	33.99	0.14	161.7	22.66	47.26	5.97	26.59	6.88	2.35	6.97	1.15	6.86	1.3	3.56	0.48	2.83	0.41	4.78	4.8	1.78
samp. CA-37	high-Ti	Galapagos	49.7	2.75	15.57	12.2099		10.99		0.19	7.01	11.03	3.46	0.68	0.36		53.206	37	340	184	88		72	94		13.1	371.47	34.33	189	32.91	0.14	158.29	22.46	47.2	5.87	26.52	6.88	2.3	6.81	1.12	6.77	1.3	3.54	0.47	2.75	0.42	4.85	4.69	1.77
samp. CA-39	high-Ti	Galapagos	48.43	2.39	15.22	10.9433		9.85		0.17	8.65	11.1	3.27	0.59	0.32		61.02	35	309	360	146		68	84		8.31	363.77	30.18	164	28.17	0.03	135.44	19.07	40.37	5.14	22.99	5.99	2.07	6.14	1	5.95	1.15	3.14	0.4	2.46	0.37	4.19	3.38	1.54
samp. E9501	high-Ti	Galapagos	48.28	2.38	13.51	12.1432		10.93		0.18	13.05	9.85	2.42	0.4	0.24		68.0341	28	287						17	7	274	23	125	18.4		119
samp. E9502	high-Ti	Galapagos	47.71	2.47	13.84	12.2654		11.04		0.18	12.29	10.05	2.44	0.4	0.25		66.4926	29	294						19	7	276	22	128	18.8		130
samp. E9503	high-Ti	Galapagos	48.18	2.46	15.13	11.6988		10.53		0.17	9.55	10.85	2.65	0.5	0.28		61.7837	30	288						20	7	361	25	149	18.7		151
samp. E9504	high-Ti	Galapagos	48.83	3.36	15.41	12.3988		11.16		0.19	6.19	10.6	3.41	0.75	0.42		49.7166	33	364						23	12	402	34	211	28.5		235
samp. E9505	high-Ti	Galapagos	50.35	2.8	15.06	11.5766		10.42		0.18	6.41	11.03	3.15	0.66	0.36		52.3033	31	306						24	11	368	29	183	24.5		189
samp. E9506	high-Ti	Galapagos	48.87	3.35	14.77	12.7543		11.48		0.19	5.83	10.71	3.64	0.76	0.43		47.5139	37	371						21	10	409	35	226	30.1		207
samp. E9507	high-Ti	Galapagos	48.76	2.59	17.37	11.0989		9.99		0.16	6.13	11.33	3.09	0.58	0.32		52.2403	31	282						24	9	443	28	179	23		167
samp. E9508	high-Ti	Galapagos	48.28	2.68	15.2	11.9544		10.76		0.17	8.02	11.23	2.72	0.56	0.3		57.0567	30	302						22	9	370	27	161	20.7		155
samp. E9509	high-Ti	Galapagos	48.16	2.55	15.61	11.8433		10.66		0.17	8.24	11.1	2.76	0.54	0.3		57.9462	34	294						18	8	383	26	154	19		168
samp. E9510	high-Ti	Galapagos	47.41	2.62	15.67	11.9877		10.79		0.18	9.36	10.13	2.99	0.63	0.34		60.7279	34	290						23	9	374	27	166	23.3		176
samp. E9511	high-Ti	Galapagos	47.68	2.61	15.73	11.8766		10.69		0.18	9.39	10.18	2.99	0.61	0.34		61.0259	32	283						20	9	373	26	165	22.4		177
samp. E9512	high-Ti	Galapagos	49.63	2.87	15.09	12.121		10.91		0.18	6.52	11.01	3.15	0.64	0.36		51.5809	30	335						22	10	368	29	177	23		186
samp. E9513	high-Ti	Galapagos	49.36	2.57	17.23	10.0101		9.01		0.16	6.02	12.32	3.05	0.42	0.31		54.3593	36	301						19	4	413	28	184	13.7		90
samp. E9514	high-Ti	Galapagos	47.24	2.62	15.38	12.4321		11.19		0.18	9.61	9.8	2.94	0.64	0.33		60.4882	26	276						22	12	373	26	167	23.1		179
samp. E9515	high-Ti	Galapagos	49.48	2.95	15.01	12.1099		10.9		0.19	6.29	10.94	3.24	0.69	0.36		50.7065	30	343						24	11	387	32	186	26.3		204
samp. E9516	high-Ti	Galapagos	49.2	2.71	16.91	11.1767		10.06		0.17	5.79	11.36	3.33	0.61	0.35		50.6407	32	309						23	8	431	30	186	24.6		171
samp. E9517	high-Ti	Galapagos	49.59	2.98	15.08	11.7988		10.62		0.19	6.29	10.89	3.19	0.67	0.36		51.3568	29	336						22	10	385	30	185	25.3		200
samp. E9518	high-Ti	Galapagos	48.5	3.35	15.35	12.1432		10.93		0.19	6.16	10.61	3.45	0.77	0.42		50.1157	34	366						24	10	404	35	212	28.2		231
samp. E9519	high-Ti	Galapagos	47.82	2.44	15.05	12.3432		11.11		0.17	9.89	9.96	2.87	0.55	0.3		61.3427	26	244						18	8	356	26	155	19.7		151
samp. E9520	high-Ti	Galapagos	47.8	2.2	15	11.6322		10.47		0.17	10.33	10.55	2.62	0.47	0.27		63.7517	35	268						23	8	348	23	144	18.9		148
samp. E9521	high-Ti	Galapagos	48.67	2.36	15.31	11.7322		10.56		0.17	8.95	10.84	2.79	0.53	0.29		60.1722	34	281						19	9	354	25	155	20.6		148
samp. E9522	high-Ti	Galapagos	48.33	2.57	15.46	11.9321		10.74		0.17	9.59	9.91	3	0.63	0.33		61.4154	28	257						20	10	376	26	165	23.7		172
samp. E9523	high-Ti	Galapagos	49.2	2.97	15.03	12.321		11.09		0.18	6.45	10.98	3.19	0.68	0.36		50.9024	33	330						23	11	380	29	185	24.2		195
samp. E9524	high-Ti	Galapagos	49.11	3.35	14.5	13.332		12		0.2	5.67	10.43	3.65	0.68	0.42		45.7192	37	370						23	9	357	37	220	26.2		186
samp. E9525	high-Ti	Galapagos	48.7	2.84	16.71	11.8099		10.63		0.17	5.81	11.31	3.29	0.63	0.35		49.3491	32	333						21	8	422	30	192	25		177
samp. E9526	high-Ti	Galapagos	50.15	3.31	14.8	12.9876		11.69		0.19	5.94	10.55	3.43	0.77	0.42		47.528	31	364						25	13	397	33	211	30.7		235
samp. E9527	high-Ti	Galapagos	48.03	3.53	15.24	12.7209		11.45		0.19	6.33	10.16	3.56	0.74	0.49		49.6344	33	368						28	12	423	37	231	30.9		217
samp. E971	high-Ti	Galapagos	48.92	3.34	15.12	12.7098		11.44		0.18	6.35	10.49	3.24	0.76	0.43		49.7351	35	364	144	57				24	12	395	34	215	29.1		257
samp. E972	high-Ti	Galapagos	49.22	3	16.05	12.5765		11.32		0.18	7.15	10.59	3.14	0.56	0.36		52.9616	38	347	190	73				23	7	369	30	184	22		222
samp. E973	high-Ti	Galapagos	49.5	2.93	15.27	12.8543		11.57		0.18	6.41	10.86	2.94	0.66	0.36		49.6877	38	326	113	55				24	9	374	30	185	24		240
samp. E974	high-Ti	Galapagos	51.87	3.31	15.62	13.0209		11.72		0.19	6.18	10.54	3.2	0.74	0.43		48.4526	33	364	74	44				26	11	384	33	210	28.5		259
samp. E975	high-Ti	Galapagos	49.68	3.23	15.73	12.9209		11.63		0.18	6.55	10.55	3.18	0.62	0.4		50.0985	38	343	172	54				25	8	382	34	206	25.4		201
samp. E976	high-Ti	Galapagos	49.03	2.96	14.84	12.621		11.36		0.18	6.34	10.66	3.1	0.68	0.37		49.8711	36	338	93	51				19	10	377	31	190	26.1		244
samp. E977	high-Ti	Galapagos	49.25	2.86	15.9	12.121		10.91		0.17	6.89	10.83	3.02	0.56	0.35		52.9579	29	325						25	8	376	30	182	22.7		208
samp. E978	high-Ti	Galapagos	50.06	3.22	15.02	12.8987		11.61		0.18	6.13	10.62	3.55	0.74	0.43		48.4852	35	392	113	38				23	9	402	34	222	27.3		246
samp. E979	high-Ti	Galapagos	49.98	2.56	17.87	11.01		9.91		0.15	5.34	11.4	2.95	0.57	0.34		48.9938	34	292	160	43				24	8	456	28	178	22.3		194
samp. E9710	high-Ti	Galapagos	49.41	2.81	16.83	10.6212		9.56		0.16	5.73	11.47	3.53	0.67	0.39		51.6542	31	322	144	64				20	8	445	30	197	23.4		189
samp. E9711	high-Ti	Galapagos	50.21	2.82	16.73	11.4322		10.29		0.16	6.04	10.9	3.04	0.62	0.38		51.1322	33	321	178	78				26	10	479	30	197	23.3		227
samp. E9712	high-Ti	Galapagos	50.08	3.77	14.85	12.4654		11.22		0.18	5.53	9.76	3.9	0.68	0.5		46.7683	34	382	80	43				24	10	374	42	246	27.8		241
samp. E9713	low-Ti	Galapagos	46.64	1.88	11.67	13.4209		12.08		0.18	19.87	7.48	2.07	0.41	0.26		74.5684	25	222	1338	594				18	5	287	20	133	15.5		137
samp. E9714	high-Ti	Galapagos	49.55	3.15	15.79	12.5987		11.34		0.18	6.06	10.75	3.56	0.69	0.41		48.7862	34	365	188	66				24	9	398	33	214	25.8		226
samp. E9715	high-Ti	Galapagos	48.55	3.46	14.14	13.5875		12.23		0.19	5.9	10.55	3.42	0.75	0.46		46.2352	41	390	189	42				21	10	398	39	241	29.5		254
samp. E9716	high-Ti	Galapagos	49.45	2.98	15.82	12.321		11.09		0.18	6.59	10.56	3.43	0.65	0.4		51.4389	32	333	185	78				23	6	412	33	211	25.9		240
samp. E9717	high-Ti	Galapagos	49.71	3.06	17.46	10.71		9.64		0.16	5.16	11.22	3.65	0.7	0.4		48.8272	35	333	152	52				22	9	448	32	211	25.4		204
samp. E9718	high-Ti	Galapagos	49.02	2.53	15.72	11.5433		10.39		0.16	9.22	9.34	3.33	0.51	0.39		61.2681	25	262	442	232				21	8	344	30	189	19.9		145
samp. E9719	high-Ti	Galapagos	49.43	2.46	15.78	11.4211		10.28		0.16	9.28	9.54	3.27	0.49	0.39		61.6738	29	276	393	236				20	7	344	30	185	19.4		176
samp. E9720	high-Ti	Galapagos	49.64	3.48	15.35	12.9654		11.67		0.18	5.7	9.97	3.41	0.84	0.47		46.5432	30	313	128	46				21	15	416	35	238	31.1		315
samp. E9721	high-Ti	Galapagos	48.71	3.36	15.43	12.8765		11.59		0.18	6.07	10.53	3.43	0.72	0.43		48.2827	34	357	138	57				26	11	402	34	217	28.4		276
samp. E9722	high-Ti	Galapagos	49.64	2.7	15.81	12.2432		11.02		0.18	6.83	11.35	2.85	0.57	0.33		52.4898	32	317	209	61				23	10	360	28	166	21.6		242
samp. E9723	high-Ti	Galapagos	49.3	2.98	14.73	12.6543		11.39		0.18	6.24	10.67	3.11	0.69	0.37		49.4077	37	341	96	45				22	10	374	30	188	26.1		221
samp. E9724	high-Ti	Galapagos	49.26	2.97	14.72	12.6098		11.35		0.18	6.37	10.64	3.02	0.68	0.36		50.0111	34	341	96	45				21	11	371	30	188	25.9		220
samp. E9725	high-Ti	Galapagos	49.4	2.6	16.24	12.0877		10.88		0.17	7.96	10.36	3.14	0.57	0.35		56.6004	31	287	207	113				20	7	422	28	185	22.1		209
samp. E9726	high-Ti	Galapagos	49.31	2.56	16.11	11.9321		10.74		0.17	8.87	10.34	3.04	0.57	0.34		59.5503	32	295	428	131				22	7	401	27	187	22.3		195
samp. E9727	high-Ti	Galapagos	49.14	3.35	15.37	12.7654		11.49		0.18	6.49	10.41	3.42	0.77	0.43		50.1712	35	360	137	53				24	14	392	33	213	27.8		262
samp. E9728	high-Ti	Galapagos	49.03	3.34	15.31	12.7098		11.44		0.18	6.03	10.46	3.48	0.78	0.43		48.4429	33	354	139	54				24	12	391	34	213	27.7		283
samp. E9729	high-Ti	Galapagos	49.15	3.38	15.68	12.2321		11.01		0.18	6.16	10.63	3.31	0.75	0.43		49.9334	30	372	133	53				24	13	399	34	212	29.2		296
samp. E9730	high-Ti	Galapagos	50.22	3.56	15.5	12.5654		11.31		0.19	5.89	10.51	3.4	0.81	0.46		48.1417	31	374	138	49				24	12	382	35	219	28.9		262
samp. E9731	high-Ti	Galapagos	49.07	3.38	15.53	12.2877		11.06		0.19	6.19	10.64	3.38	0.77	0.43		49.9416	33	353	142	54				23	15	396	33	212	27.4		227
samp. E9732	high-Ti	Galapagos	49.96	3.48	15.65	12.4543		11.21		0.19	5.89	10.27	3.48	0.82	0.45		48.3634	30	368	135	54				23	12	386	35	225	30.1		293
samp. E9733	high-Ti	Galapagos	48.35	2.98	16.19	11.8766		10.69		0.18	6.36	10.05	2.74	0.65	0.34		51.4692	37	304						25	8	376	32	190	24		234
samp. E9739	high-Ti	Galapagos	48.92	3.26	15.3	12.6876		11.42		0.18	6.04	10.52	3.33	0.77	0.42		48.528	33	354	146	50				24	12	401	33	210	26.9		265
samp. E9740	high-Ti	Galapagos	47.6	3.12	16.4	12.0099		10.81		0.16	6.64	9.43	4.17	0.87	0.51		52.266	23	307	153	98				20	15	481	35	255	34		267
samp. E9741	high-Ti	Galapagos	49.45	3.54	15.13	12.9098		11.62		0.19	5.78	10.56	3.71	0.84	0.45		46.9971	37	406	144	34				27	12	368	35	227	30.5		286
samp. E9742	high-Ti	Galapagos	48.46	3.33	14.91	12.6098		11.35		0.18	6.21	10.44	3.39	0.79	0.42		49.3752	34	355	138	63				23	11	401	34	214	28.7		289
samp. E9743	high-Ti	Galapagos	48.6	3.35	15.23	13.1542		11.84		0.18	6.02	10.52	3.53	0.79	0.43		47.5437	33	354	138	49				22	12	401	33	215	28.5		276
samp. E9744	high-Ti	Galapagos	49.5	3.05	17.33	11.1767		10.06		0.15	5.42	10.82	3.49	0.74	0.4		48.9899	28	304	158	56				23	10	433	30	203	27.3		233
samp. E9745	high-Ti	Galapagos	48.97	3.38	15.42	12.932		11.64		0.18	6	10.61	3.43	0.79	0.43		47.8856	33	373	138	49				24	15	405	34	216	28.9		299
samp. E9746	high-Ti	Galapagos	50.28	2.96	15.69	12.0543		10.85		0.18	6.03	10.79	2.98	0.64	0.36		49.7661	31	329	119	51				26	10	369	31	186	23.3		246
samp. E9747	high-Ti	Galapagos	48.8	3.33	15	12.7765		11.5		0.18	6.14	10.49	3.38	0.77	0.43		48.7638	36	357	231	49				21	12	392	33	215	29.4		253
samp. E9748	high-Ti	Galapagos	50.22	2.95	14.91	12.4987		11.25		0.18	6.04	10.75	3.13	0.68	0.36		48.9027	29	334	95	43				23	10	371	30	190	25.4		214
samp. E9749	high-Ti	Galapagos	48.61	3.27	15.35	13.1987		11.88		0.21	5.74	11.15	3.2	0.65	0.42		46.2736	37	387	187	45				26	4	439	37	228	28.2		209
samp. E9750	high-Ti	Galapagos	48.68	2.55	15.92	11.3766		10.24		0.16	6.33	11.4	2.69	0.68	0.32		52.4246	39	314						25	14	386	28	177	21.2		170
samp. E9751	high-Ti	Galapagos	50.13	2.19	16.32	12.1099		10.9		0.17	5.8	11.77	2.78	0.45	0.26		48.6793	36	290						23	9	342	24	138	16.8		130
samp. E9752	high-Ti	Galapagos	50.18	2.1	16.9	11.6433		10.48		0.17	5.74	11.86	2.78	0.45	0.25		49.4014	35	270						20	7	344	24	132	15.4		122
samp. E9753	high-Ti	Galapagos	50.08	2.21	16.01	11.8877		10.7		0.18	5.94	11.74	2.83	0.49	0.26		49.7382	37	299						24	7	336	24	139	16.8		132
samp. E9754	high-Ti	Galapagos	49.12	2.53	17.8	10.7211		9.65		0.15	5.44	11.61	3.09	0.58	0.32		50.1221	35	278						23	10	448	27	176	22.7		177
samp. E9755	high-Ti	Galapagos	48.74	3.06	14.72	13.132		11.82		0.19	5.92	10.81	3.25	0.64	0.36		47.1682	34	337						23	9	392	33	200	24.2		176
samp. E9756	high-Ti	Galapagos	49.48	2.51	15.03	13.2431		11.92		0.19	5.93	11.56	2.9	0.56	0.3		47.0004	37	303						22	8	367	28	161	20.3		166
samp. E9757	high-Ti	Galapagos	49.68	2.56	14.97	13.0765		11.77		0.19	5.79	11.62	2.9	0.56	0.3		46.7208	38	305						24	8	363	27	153	21.3		158
samp. E9758	high-Ti	Galapagos	49.42	2.65	14.36	13.7875		12.41		0.19	6	11.47	2.96	0.59	0.32		46.2898	36	332						19	8	359	28	168	20.7		162
samp. E9759	low-Ti	Galapagos	48.77	1.99	17.41	11.1544		10.04		0.16	6.47	11.82	2.68	0.46	0.24		53.461	31	242						19	6	403	20	133	16.9		136
samp. E9760	high-Ti	Galapagos	49.36	2.45	15.61	12.6876		11.42		0.18	6.26	11.77	2.86	0.56	0.3		49.422	38	299						19	8	382	26	158	20.6		165
samp. E9761	high-Ti	Galapagos	49.38	2.39	15.46	12.1654		10.95		0.17	6.07	11.93	2.84	0.54	0.29		49.7021	41	306						24	8	382	26	156	20.4		160
samp. E9762	high-Ti	Galapagos	49.34	2.28	16.19	11.6322		10.47		0.17	6.4	11.95	2.75	0.49	0.28		52.1449	34	279						19	8	388	24	149	19.1		145
samp. E9763	high-Ti	Galapagos	49.68	2.16	16.46	11.9432		10.75		0.17	6.49	11.74	2.77	0.49	0.26		51.8347	34	263						21	9	390	23	144	17.7		144
samp. E9764	high-Ti	Galapagos	49.71	2.59	14.59	13.0765		11.77		0.19	6.43	11.61	2.9	0.59	0.31		49.3371	38	319						22	10	367	27	165	22.3		179
samp. E9765	high-Ti	Galapagos	48.83	2.17	16.37	12.1543		10.94		0.17	6.6	11.58	2.75	0.51	0.27		51.8169	36	269						19	7	393	24	146	18.4		143
samp. E9766	low-Ti	Galapagos	49.76	1.92	18.02	10.9211		9.83		0.15	6.67	11.85	2.73	0.47	0.24		54.7418	36	244						20	5	410	20	129	15.1		128
samp. E9767	high-Ti	Galapagos	48.91	2.55	16.04	11.5988		10.44		0.17	5.84	11.57	2.89	0.71	0.32		49.9287	37	307						23	11	435	29	175	20.1		167
samp. E9768	high-Ti	Galapagos	49.55	3.13	16.64	12.0766		10.87		0.17	4.78	10.82	3.48	0.74	0.41		43.9423	30	310						24	13	446	33	212	28		208
samp. E9769	high-Ti	Galapagos	48.78	2.43	16.7	11.1989		10.08		0.16	5.96	11.67	3.04	0.54	0.3		51.3142	35	278						21	8	418	26	167	21		170
samp. E9770	high-Ti	Galapagos	48.99	3	15.53	12.8987		11.61		0.18	6.22	10.96	3.17	0.63	0.36		48.8494	37	337						19	13	399	30	195	24.3		180
samp. E9771	high-Ti	Galapagos	49.74	3.24	15.37	12.9098		11.62		0.18	5.72	10.65	3.42	0.71	0.4		46.7373	35	350						25	10	392	34	215	26.3		190
samp. E9772	high-Ti	Galapagos	49.07	3.28	14.01	14.2986		12.87		0.2	5.57	10.93	3.17	0.74	0.41		43.5501	39	369						22	8	391	34	216	28.6		217
samp. E9773	high-Ti	Galapagos	50.01	2.69	16.44	11.8877		10.7		0.18	5.7	11.76	2.97	0.61	0.34		48.7074	35	306	175	47				19	10	424	27	181	22.7		175
samp. E9774	high-Ti	Galapagos	48.9	2.6	16.45	12.0543		10.85		0.17	5.61	11.2	3.21	0.58	0.32		47.9624	33	311						20	8	396	29	173	21.5		171
samp. E9775	high-Ti	Galapagos	49.3	2.32	17.55	11.0878		9.98		0.16	5.91	11.86	2.9	0.54	0.29		51.3528	33	280						20	8	445	25	159	18.8		167
samp. E9776	high-Ti	Galapagos	49.64	2.39	17.56	11.1878		10.07		0.16	5.78	11.83	2.91	0.55	0.3		50.5726	39	273						22	8	446	25	165	19.7		152
samp. E9776	high-Ti	Galapagos	49.44	2.61	16.59	12.1432		10.93		0.17	5.92	11.47	2.92	0.6	0.33		49.1223	37	299						25	10	429	28	178	21.5		181
samp. E9777	high-Ti	Galapagos	49.56	2.37	17.77	11.1656		10.05		0.16	5.84	11.79	2.87	0.54	0.3		50.8804	36	281						22	9	453	25	163	20.5		160
samp. E9779	high-Ti	Galapagos	49.19	3.19	16.87	11.4544		10.31		0.17	4.98	11.06	3.54	0.75	0.41		46.2664	33	332						24	9	467	31	216	28.2		212
samp. E9780	high-Ti	Galapagos	49.52	3.17	16.86	11.7766		10.6		0.17	4.93	10.91	3.48	0.75	0.41		45.3274	33	311						22	11	464	32	220	29.3		220
samp. E9781	high-Ti	Galapagos	48.69	3.08	16.77	11.8988		10.71		0.17	5.36	10.84	3.38	0.74	0.4		47.1493	33	325						21	10	460	31	213	29.4		217
samp. E9782	high-Ti	Galapagos	48.5	3.27	16.1	12.8098		11.53		0.18	5.54	10.76	3.29	0.71	0.4		46.1354	35	339						26	12	455	32	215	27.8		189
samp. E9783	high-Ti	Galapagos	48.97	2.83	17.37	11.5877		10.43		0.16	5.41	10.88	3.29	0.64	0.35		48.0417	31	283						22	9	459	27	189	25.6		193
samp. E9784	high-Ti	Galapagos	48.36	2.75	17.18	11.9988		10.8		0.17	6.1	10.44	3.13	0.66	0.36		50.1701	30	260						23	11	460	28	192	25.3		192
samp. E9785	high-Ti	Galapagos	49.11	3.78	14.73	13.632		12.27		0.19	5.16	10.14	3.65	0.85	0.51		42.8455	36	389						23	11	430	39	266	33.4		243
samp. E9786	high-Ti	Galapagos	49.7	3.11	15.12	13.2098		11.89		0.19	5.67	10.59	3.44	0.63	0.39		45.9478	38	359						23	9	367	34	206	24.6		183
samp. E9787	high-Ti	Galapagos	50.17	3.17	14.43	14.1764		12.76		0.2	5.31	10	3.48	0.67	0.39		42.5885	31	354	56	28				25	9	346	34	209	26.3		194
samp. E9788	high-Ti	Galapagos	49.82	2.84	16.4	12.1099		10.9		0.17	5.48	11.56	2.92	0.55	0.34		47.2629	40	328	160	58				21	8	420	29	185	22		168
samp. E9789	high-Ti	Galapagos	49.08	2.95	15.19	12.932		11.64		0.19	5.92	11.55	2.95	0.57	0.34		47.5508	38	358	193	38				21	8	403	31	193	23.3		174
samp. E9790	high-Ti	Galapagos	48.27	3.01	14.69	13.5986		12.24		0.19	6.16	11.41	3	0.54	0.34		47.2884	37	370	185	49				23	7	396	31	194	24		171
samp. E9791	high-Ti	Galapagos	49.16	2.69	17.28	11.1211		10.01		0.16	5.35	11.31	3.31	0.62	0.34		48.7896	34	306	154	45				21	10	451	28	188	21.6		156
samp. E9792	high-Ti	Galapagos	48.93	3.46	14.4	13.5875		12.23		0.2	5.66	10.45	3.59	0.81	0.45		45.2047	35	399	72	34				22	10	405	38	240	30.9		240
samp. E9793	high-Ti	Galapagos	49.22	3.13	15.98	12.2988		11.07		0.18	5.33	10.97	3.43	0.71	0.39		46.1868	31	348	153	34				24	10	422	35	217	25.9		200
samp. E9794	high-Ti	Galapagos	49.08	2.38	18.15	10.8323		9.75		0.15	6.01	11.29	3.07	0.53	0.29		52.3538	29	281	148	68				20	7	469	25	171	19.3		146
samp. E9795	high-Ti	Galapagos	49.68	3.27	15.44	12.9654		11.67		0.19	5.79	11.04	3.27	0.72	0.41		46.9332	37	366	188	53				23	10	420	33	224	27.9		214
samp. E9796	high-Ti	Galapagos	49.33	3.2	15.35	12.7876		11.51		0.19	6.02	11.04	3.39	0.74	0.41		48.2491	35	368	180	41				22	11	420	35	221	28.2		204
samp. E9797	high-Ti	Galapagos	49.61	3.06	16.05	12.4099		11.17		0.18	5.99	11.1	3.33	0.73	0.4		48.8733	31	346	178	39				22	12	447	32	213	26.2		201
samp. E9798	high-Ti	Galapagos	49.67	3.09	16.01	12.5321		11.28		0.18	5.86	11.08	3.36	0.71	0.4		48.0805	33	329	170	40				24	10	447	33	216	26		208
samp. E9799	high-Ti	Galapagos	49.2	3.02	15.75	12.5987		11.34		0.18	5.93	11.02	3.2	0.69	0.39		48.2445	34	358	189	48				23	12	405	32	206	25.4		194
samp. E97100	high-Ti	Galapagos	49.49	2.92	16.66	11.821		10.64		0.17	5.54	11.2	3.4	0.7	0.39		48.1368	28	314	144	38				22	9	469	31	207	24.3		187
samp. E97101	high-Ti	Galapagos	48.8	3.48	14.64	13.732		12.36		0.2	5.63	10.78	3.53	0.82	0.46		44.8114	31	379	132	31				23	13	422	37	247	30.1		272
samp. E97102	high-Ti	Galapagos	48.52	2.5	17.09	11.4544		10.31		0.16	6.81	11.05	3.21	0.62	0.33		54.0745	31	270	217	97				22	10	448	27	172	22.3		181
samp. E97103	high-Ti	Galapagos	48.54	2.56	17.16	11.5655		10.41		0.16	6.73	11.11	3.13	0.62	0.33		53.5409	35	290	190	87				19	10	451	27	177	22.9		200
samp. E97104	high-Ti	Galapagos	49.69	3.19	14.89	12.9876		11.69		0.19	6	10.68	3.16	0.73	0.39		47.7787	33	354	69	58				22	13	392	31	203	28.5		226
samp. E97105	high-Ti	Galapagos	49.39	3.29	14.79	13.2542		11.93		0.19	5.86	10.45	3.01	0.77	0.41		46.6838	36	376	68	70				25	12	393	34	212	30.3		231
samp. E97106	high-Ti	Galapagos	49.33	2.39	16.6	11.8099		10.63		0.16	7.56	10.89	2.61	0.48	0.29		55.9037	31	275	277	118				18	8	359	25	149	19.3		155
samp. E97107	high-Ti	Galapagos	49.85	3.24	15.01	13.1987		11.88		0.19	5.98	10.6	3.26	0.76	0.4		47.2933	32	363	73	52				25	11	392	33	208	29.5		235
samp. E97108	high-Ti	Galapagos	48.52	3.42	14.7	13.3764		12.04		0.18	7.01	9.58	3.4	0.73	0.44		50.9291	32	347	178	115				25	9	396	39	225	29.4		213
samp. E97109	high-Ti	Galapagos	48.69	2.91	16.83	11.7433		10.57		0.16	5.98	10.62	3.32	0.68	0.4		50.2116	27	289	159	84				22	9	463	32	210	27		226
samp. E97110	high-Ti	Galapagos	48.76	2	18.16	10.4656		9.42		0.15	8.74	11.19	2.62	0.47	0.25		62.3197	32	228	256	152				21	7	483	21	138	16.9		144
samp. E97111	high-Ti	Galapagos	49.2	3.65	15.66	13.4098		12.07		0.19	5.07	10.96	3.32	0.79	0.46		42.8171	32	360	134	44				23	11	428	40	236	32.8		261
samp. E97112	high-Ti	Galapagos	48.69	3.22	15.55	12.8321		11.55		0.19	5.67	11.59	3.11	0.69	0.39		46.6691	38	365	164	46				24	9	434	34	208	27.3		221
samp. E97113	high-Ti	Galapagos	48.85	2.77	17.19	10.9656		9.87		0.16	6.07	11.78	3.1	0.52	0.34		52.2964	35	333	196	68				24	6	434	32	190	22.8		190
samp. E97114	high-Ti	Galapagos	48.9	2.41	16.36	11.6544		10.49		0.17	9.08	10.43	2.96	0.58	0.32		60.676	27	256	285	175				18	8	423	27	164	21.5		185
samp. E97115	high-Ti	Galapagos	49.38	3.34	15.66	13.2653		11.94		0.19	6.01	10.66	3.03	0.62	0.44		47.2925	35	378	182	51				23	9	399	37	228	28.2		210
samp. E97125	high-Ti	Galapagos	51.29	3.48	15.56	12.1877		10.97		0.18	5.84	10.08	3.51	0.86	0.48		48.691	33	330	127	49				26	14	393	35	234	31.4		265
samp. E97127	high-Ti	Galapagos	49.75	3.63	15.62	12.7765		11.5		0.18	5.2	9.66	3.71	0.96	0.53		44.6302	29	348	85	38				27	17	408	38	249	36.8		294
samp. E97128	high-Ti	Galapagos	50.03	3.19	15.54	12.7432		11.47		0.19	5.84	10.32	3.72	0.96	0.45		47.5784	32	333	53	27				21	17	425	33	214	33.2		282
samp. E97130	high-Ti	Galapagos	49.27	3.19	15.41	13.1209		11.81		0.19	5.53	10.3	3.61	0.95	0.45		45.4949	32	323	52	29				24	14	429	33	214	31.8		324
samp. E97131	high-Ti	Galapagos	48.65	2.87	16.79	11.6988		10.53		0.17	6.12	11.49	3.12	0.63	0.36		50.8848	33	317	148	55				21	9	457	30	195	24.3		182
samp. E97133	high-Ti	Galapagos	48.31	2.78	17.23	11.3322		10.2		0.16	6.05	11.57	3.33	0.64	0.35		51.393	35	312	145	63				24	7	470	29	193	23.9		190
samp. E97134	high-Ti	Galapagos	47.37	2.2	15.78	12.0655		10.86		0.16	10.74	9.81	2.83	0.49	0.29		63.806	30	231	320	231				20	6	409	24	158	18.1		183
samp. E97135	high-Ti	Galapagos	49.03	2.37	16.6	11.21		10.09		0.16	9.23	10.36	3.1	0.53	0.31		61.9866	33	256	437	170				21	7	424	25	167	18.9		151
samp. E97136	high-Ti	Galapagos	48.96	2.83	16.54	11.2433		10.12		0.17	6.42	10.72	3.81	0.67	0.38		53.0703	31	294	210	82				22	10	425	30	197	24.4		200
samp. W95 1	high-Ti	Galapagos	48.97	3.21	14.69	13.0876		11.78		0.19	6.28	10.75	3.26	0.56	0.4		48.726	46	371				95	100	24	5	376	35	236	19		91
samp. W95 2	high-Ti	Galapagos	49.42	3.22	14.49	13.0654		11.76		0.19	6.17	11	3.42	0.54	0.38		48.3271	49	376				88	103	21	5	384	34	224	18		112
samp. W95 3	high-Ti	Galapagos	49.18	2.71	15.65	11.6322		10.47		0.17	6.4	11.85	3.03	0.44	0.31		52.1449	46	310				100	87	21	5	391	29	189	15		88
samp. W95 4	high-Ti	Galapagos	49.13	3.23	14.23	12.932		11.64		0.19	6.11	10.87	3.44	0.57	0.39		48.3392	39	366				76	102	24	7	380	36	236	19		94
samp. W95 5	high-Ti	Galapagos	49.35	3.21	14.33	13.4098		12.07		0.19	6.16	10.86	3.28	0.54	0.39		47.6372	35	368				73	96	23	7	380	36	234	19		114
samp. W95 6	high-Ti	Galapagos	48.51	3.25	14.42	12.7543		11.48		0.2	6.27	10.92	3.19	0.54	0.39		49.3309	31	370				228	104	20	5	376	35	232	18		115
samp. W95 7	high-Ti	Galapagos	48.84	3.33	13.95	13.9097		12.52		0.2	5.69	10.4	3.42	0.56	0.41		44.7555	30	377				76	110	24	6	353	37	242	19		116
samp. W95 8	high-Ti	Galapagos	49.53	3.31	14.29	13.0654		11.76		0.19	6.05	10.69	3.45	0.58	0.41		47.8368	29	369				80	105	24	6	380	37	247	20		114
samp. W95 9	high-Ti	Galapagos	49.26	3.09	14.33	13.1209		11.81		0.19	6.33	11.17	3.05	0.52	0.34		48.8606	33	372				102	97	23	5	388	31	207	18		113
samp. W95 10	high-Ti	Galapagos	49.38	3.1	14.3	13.1765		11.86		0.19	6.43	11.18	3.1	0.52	0.34		49.1467	30	382				100	98	20	5	392	31	205	17		116
samp. W95 11	high-Ti	Galapagos	49.12	3.09	14.32	13.0431		11.74		0.19	6.28	11.18	3.1	0.52	0.34		48.811	35	382				105	101	22	6	387	31	205	17		108
samp. W95 12	high-Ti	Galapagos	50.02	3.05	14.67	12.2766		11.05		0.18	6.7	11.04	3.18	0.5	0.36		51.9425	33	358				109	94	22	6	375	33	220	16		99
samp. W95 13	high-Ti	Galapagos	48.62	3.04	14.27	13.1987		11.88		0.19	6.34	11.2	2.99	0.51	0.34		48.7524	36	385				99	98	26	5	391	31	207	17		125
samp. W95 14	high-Ti	Galapagos	48.92	3.44	14	13.4875		12.14		0.2	5.78	10.39	3.25	0.6	0.42		45.9082	37	395				122	106	22	7	376	37	249	20		131
samp. W95 15	high-Ti	Galapagos	48.8	2.99	14.46	12.4654		11.22		0.18	6.51	11.29	3.62	0.54	0.57		50.8425	40	359				108	93	21	7	388	31	209	17		127
samp. W95 16	high-Ti	Galapagos	48.39	3.26	14.4	12.932		11.64		0.19	6.04	10.92	3.36	0.57	0.48		48.0515	34	372				51	94	20	5	389	33	241	20		125
samp. W95 17	high-Ti	Galapagos	49.35	3.62	14.02	13.5986		12.24		0.2	5.57	10.18	3.62	0.63	0.45		44.7877	34	390				107	108	23	6	376	41	272	20		125
samp. W95 18	high-Ti	Galapagos	48.95	3.23	14.27	12.6876		11.42		0.19	6.04	10.9	3.28	0.57	0.4		48.528	33	381				90	94	22	5	385	35	238	19		122
samp. W95 19	high-Ti	Galapagos	49.36	3.54	14.17	13.1876		11.87		0.2	5.74	10.42	3.38	0.6	0.43		46.2945	32	388				92	96	23	6	376	38	258	21		124
samp. W95 20	high-Ti	Galapagos	48.53	3.05	14.24	12.5543		11.3		0.19	6.26	11.09	3.16	0.5	0.36		49.686	35	352				74	93	24	6	388	32	218	17		98
samp. W95 21	high-Ti	Galapagos	48.69	3.31	13.96	13.7542		12.38		0.2	5.97	10.6	3.24	0.54	0.38		46.2254	36	390				112	103	25	5	389	36	238	17		118
samp. W95 22	high-Ti	Galapagos	48.52	2.77	13.92	12.2877		11.06		0.19	6.6	11.92	2.95	0.4	0.29		51.5445	39	378				153	87	20	4	317	33	180	13		90
samp. W95 23	high-Ti	Galapagos	48.23	2.34	17.15	10.2323		9.21		0.14	6.21	12.18	2.42	0.3	0.24		54.5854	28	272				82	70	19	3	382	23	154	11		83
samp. W95 24	high-Ti	Galapagos	48.97	2.9	16.96	11.5433		10.39		0.17	4.9	11.38	3.18	0.49	0.34		45.6722	30	334				89	89	20	6	415	32	211	15		108
samp. W95 25	high-Ti	Galapagos	49.36	2.52	16.58	10.9989		9.9		0.16	6.07	12.05	2.91	0.38	0.28		52.2207	36	316				98	78	22	5	390	28	173	14		89
samp. W95 26	high-Ti	Galapagos	48.63	2.96	14.68	13.1209		11.81		0.19	6.18	11.35	3.02	0.43	0.31		48.2616	40	361				130	98	22	5	370	30	192	15		112
samp. W95 27	high-Ti	Galapagos	49.21	3.3	14.22	12.8654		11.58		0.19	6.11	10.88	3.25	0.52	0.38		48.4682	36	378				121	99	22	6	371	36	231	17		106
samp. W95 28	high-Ti	Galapagos	49.15	3.16	14.34	13.1987		11.88		0.19	6.23	11.03	3.22	0.5	0.36		48.3152	37	364				108	99	19	5	379	34	222	16		106
samp. W95 29	high-Ti	Galapagos	49.31	2.94	16.77	11.4766		10.33		0.17	5.26	11.48	3.16	0.49	0.35		47.5804	32	316				94	128	24	5	410	32	214	16		96
samp. W95 30	high-Ti	Galapagos	48.75	2.73	15.51	11.6099		10.45		0.17	6.26	11.84	3.01	0.44	0.31		51.6404	38	324				102	86	20	5	390	30	188	15		94
samp. W95 31	high-Ti	Galapagos	48.77	3.02	14.25	13.3431		12.01		0.19	6.36	11.17	3.07	0.52	0.34		48.5592	37	359				101	98	23	5	386	31	208	18		107
samp. W95 32	high-Ti	Galapagos	48.87	2.71	16.24	10.7211		9.65		0.17	5.72	11.62	3.1	0.46	0.34		51.3765	38	319				111	92	21	5	407	31	202	16		99
samp. W95 33	high-Ti	Galapagos	49	2.86	15.42	11.7544		10.58		0.18	6.56	11.84	2.95	0.41	0.32		52.5001	39	335				113	91	19	4	364	32	194	14		82	13.9	35.4	5.3	25.5	6.72	2.23	7.17	1.12	6.38	1.23	3.21	0.44	2.67	0.41
samp. W95 34	high-Ti	Galapagos	49.23	3.21	14.25	13.3098		11.98		0.19	5.95	10.65	3.35	0.56	0.41		46.9592	34	380				104	105	24	7	373	38	252	19		105
samp. W95 35	high-Ti	Galapagos	48.85	3.12	14.15	13.4209		12.08		0.19	6.02	10.76	3.25	0.54	0.39		47.0434	36	361				84	100	23	4	373	37	236	18		108
samp. W95 36	high-Ti	Galapagos	48.31	3.13	14.14	12.7876		11.51		0.19	6	10.77	3.21	0.52	0.38		48.166	37	362				79	98	19	6	384	35	233	16		107
samp. W95 37	high-Ti	Galapagos	48.55	3.23	14.33	13.1654		11.85		0.19	6	10.72	3.4	0.55	0.39		47.4396	35	373				76	100	21	7	388	36	235	19		121
samp. W95 38	high-Ti	Galapagos	48.96	3.06	14.56	12.9876		11.69		0.18	6.39	11.13	3.27	0.49	0.35		49.3516	40	367				109	93	24	5	387	32	213	17		82
samp. W95 39	high-Ti	Galapagos	48.52	3.71	13.95	14.643		13.18		0.21	5.16	9.76	3.57	0.64	0.49		41.1032	35	395				95	111	24	7	379	42	279	23		122
samp. W95 40	high-Ti	Galapagos	46.13	3.18	13.55	12.6543		11.39		0.19	5.69	10.38	3.04	0.54	0.38		47.1042	36	376				113	100	23	7	387	35	231	19		81
samp. W95 41	high-Ti	Galapagos	48.89	3.02	14.31	13.3209		11.99		0.19	6.4	11.2	3.03	0.51	0.34		48.7575	39	360				97	96	21	6	388	31	207	17		84
samp. W95 43	high-Ti	Galapagos	48.96	3.35	13.98	13.4542		12.11		0.19	5.78	10.69	3.16	0.57	0.4		45.9696	40	374				116	102	26	4	353	37	238	19		96
samp. W95 44	high-Ti	Galapagos	48.86	2.81	15.57	12.021		10.82		0.17	6.12	11.59	3.01	0.42	0.33		50.2057	33	312				113	93	21	3	356	34	201	15		95
samp. W95 45	high-Ti	Galapagos	49.75	3.48	13.92	13.6653		12.3		0.21	5.04	9.36	3.55	0.81	0.68		42.2107	31	352				93	121	27	10	349	58	385	29		151
samp. W95 46	high-Ti	Galapagos	48.33	3.1	14.25	12.5765		11.32		0.19	6.02	11.07	2.88	0.45	0.36		48.6648	34	339				105	98	24	3	361	36	223	17		102
samp. W95 47	high-Ti	Galapagos	48.63	3.21	14.32	12.9765		11.68		0.18	6.06	10.96	3.02	0.47	0.37		48.0484	35	340				101	94	21	4	370	35	229	16		104
samp. W95 48	high-Ti	Galapagos	48.02	3.02	14.22	12.7209		11.45		0.19	6.48	11.22	3.06	0.44	0.34		50.2199	39	323				86	97	21	5	372	33	215	15		97	27.4	70	10.3	48.3	12.2	3.69	12.7	1.93	11.01	2.12	5.57	0.75	4.67	0.71
samp. W95 49	high-Ti	Galapagos	48	3.19	14.08	13.3431		12.01		0.19	6.04	10.84	3.19	0.47	0.37		47.2709	37	348				114	95	22	3	355	37	228	17		97
samp. W95 50	high-Ti	Galapagos	48.16	3.03	14.05	13.4209		12.08		0.19	6.19	11.04	3.03	0.51	0.34		47.7377	34	359				106	97	24	5	388	31	209	18		123
samp. W95 51	high-Ti	Galapagos	49.04	3.41	13.98	13.4431		12.1		0.19	5.68	10.35	3.27	0.63	0.42		45.557	36	378				117	105	24	6	381	38	247	21		123
samp. W95 52	high-Ti	Galapagos	48.59	2.61	16.14	11.1211		10.01		0.16	6.07	11.91	2.88	0.45	0.31		51.945	31	312				115	82	21	6	396	28	187	14		80
samp. W95 53	high-Ti	Galapagos	49.13	3.11	14.35	13.1209		11.81		0.19	6.18	11.02	2.93	0.49	0.36		48.2616	36	362				121	101	26	4	379	33	220	17		101
samp. W95 54	high-Ti	Galapagos	48.67	3.25	14.28	13.1765		11.86		0.19	5.95	10.56	3.2	0.57	0.4		47.21	33	373				96	99	23	7	373	37	241	20		113	18.5	46.2	6.7	31.3	7.88	2.53	8.16	1.27	7.14	1.38	3.62	0.5	3.04	0.46
samp. W95 55	high-Ti	Galapagos	47.86	3.48	13.85	13.7875		12.41		0.2	5.54	10.3	3.26	0.58	0.43		44.3136	38	399				126	107	25	5	377	39	254	20		131	20.1	50.1	7.3	34	8.57	2.78	8.91	1.37	7.71	1.48	3.89	0.54	3.22	0.49
samp. W95 56	high-Ti	Galapagos	48.48	3.1	14.44	13.1654		11.85		0.19	6.27	11.02	3.09	0.49	0.36		48.5382	37	363				123	94	24	5	380	33	220	17		105
samp. W95 57	high-Ti	Galapagos	48.32	3.43	13.82	13.5209		12.17		0.2	5.6	10.13	3.29	0.59	0.42		45.0625	36	395				92	104	25	6	363	38	252	20		121
samp. W95 58	high-Ti	Galapagos	48.72	3.4	13.98	13.5209		12.17		0.19	5.65	10.34	3.25	0.64	0.42		45.2827	36	382				112	103	24	4	378	37	245	19		117
samp. W95 59	high-Ti	Galapagos	48.97	2.9	15.2	11.8766		10.69		0.18	6.42	11.38	2.97	0.47	0.34		51.7037	37	332				118	98	20	5	380	32	205	16		95	15.8	39.2	5.7	26.8	6.88	2.26	7.15	1.1	6.22	1.19	3.12	0.42	2.56	0.39
samp. W95 60	high-Ti	Galapagos	48.74	2.85	17.12	11.8766		10.69		0.17	4.69	11.42	3.02	0.4	0.28		43.8854	30	359				121	93	24	4	389	28	173	16		85
samp. W95 61	high-Ti	Galapagos	47.77	3.16	15.51	13.2653		11.94		0.18	7.28	9.75	3.16	0.57	0.37		52.0813	32	342				46	112	24	8	378	33	193	24		173
samp. W95 62	low-Ti	Galapagos	48.61	1.61	17.23	8.65469		7.79		0.13	9.5	12.74	2.16	0.25	0.19		68.4928	34	204				58	56	19	5	359	18	118	9		34
samp. W95 63	high-Ti	Galapagos	48.27	3.47	14.26	14.1875		12.77		0.2	5.57	10.59	3.17	0.48	0.33		43.742	38	434				144	109	23	6	354	35	204	19		110	38.7	27.5	22.5	16.4	17	4.66	4.88	4.29	3.9	3.96	2.34	1.93	1.66	1.65
samp. W95 64	high-Ti	Galapagos	49.12	2.75	16.76	11.0878		9.98		0.16	5.6	11.59	3.22	0.5	0.34		50.0062	36	311				88	85	24	5	409	32	213	16		81
samp. W95 65	high-Ti	Galapagos	48.91	3.46	14.02	13.3987		12.06		0.2	5.72	10.24	3.45	0.6	0.44		45.8133	32	391				117	103	24	5	379	40	251	21		135
samp. W95 66	high-Ti	Galapagos	48.95	2.53	18.36	10.1656		9.15		0.15	4.86	11.94	3.18	0.44	0.31		48.634	32	294				85	75	24	6	431	27	186	15		86
samp. W95 67	high-Ti	Galapagos	48.68	3.33	14.6	13.232		11.91		0.2	5.83	10.45	3.5	0.57	0.41		46.5978	33	364				97	101	24	6	383	36	240	19		117
samp. W95 68	high-Ti	Galapagos	49.12	3.19	15.29	12.6098		11.35		0.19	5.59	10.8	3.32	0.49	0.38		46.7502	34	348				100	96	24	6	392	34	226	19		112
samp. W95 69	high-Ti	Galapagos	48.35	3.01	16.1	12.4099		11.17		0.18	5.38	11.06	3.1	0.45	0.36		46.1954	33	338				99	97	24	5	404	34	218	19		106
samp. W95 70	high-Ti	Galapagos	48.82	2.58	17.76	11.0656		9.96		0.16	5.19	11.79	3.01	0.4	0.3		48.1563	32	287				73	81	22	4	415	29	191	14		103
samp. W95 71	high-Ti	Galapagos	49.27	2.56	16.71	10.5323		9.48		0.16	5.57	11.79	2.92	0.42	0.31		51.1566	38	290				81	85	25	4	380	30	186	14		85
samp. W95 72	high-Ti	Galapagos	48.95	2.45	17.78	10.4323		9.39		0.15	5.4	12.17	2.9	0.4	0.29		50.6204	35	289				84	78	21	4	396	27	178	13		81
samp. W95 73	high-Ti	Galapagos	48.93	3.74	13.71	14.9652		13.47		0.21	5.14	9.63	3.51	0.65	0.48		40.4838	36	419				88		24	9	371	43	276	22		149
samp. W95 74	high-Ti	Galapagos	48.86	2.32	18.1	9.98789		8.99		0.14	5.75	12.45	2.89	0.39	0.28		53.2741	31	270				76		23	4	420	27	172	13		78	12.5	31.5	4.7	22.1	5.69	1.96	6	0.94	5.27	1.01	2.65	0.37	2.19	0.33
samp. W95 75	high-Ti	Galapagos	49.36	2.32	18.37	9.89901		8.91		0.14	5.91	12.5	2.76	0.37	0.29		54.1786	35	273				78		21	3	418	27	170	13		82	15.2	38.1	5.6	26.2	6.63	2.16	6.86	1.07	6.03	1.15	3.03	0.42	2.53	0.39
samp. W95 76	high-Ti	Galapagos	48.86	3.21	14.46	12.9209		11.63		0.19	6.15	10.91	3.22	0.54	0.39		48.5236	34	363				79		24	4	382	37	231	20		110
samp. W95 77	high-Ti	Galapagos	48.96	3.25	14.43	13.0098		11.71		0.19	6.04	10.74	3.17	0.56	0.39		47.9018	37	374				116		24	6	388	34	233	19		115
samp. W95 78	high-Ti	Galapagos	48.19	2.16	17.7	9.63237		8.67		0.14	7.05	12.44	2.67	0.37	0.25		59.1754	33	257				81		21	5	406	23	158	12		74
samp. W95 79	high-Ti	Galapagos	49.35	3.45	14.23	13.6986		12.33		0.2	5.76	10.39	3.44	0.6	0.43		45.4369	32	402				123		24	5	373	39	254	20		110
samp. W95 80	high-Ti	Galapagos	49.37	3.25	14.3	13.0765		11.77		0.19	6.06	10.7	3.29	0.57	0.39		47.8568	34	364				123		24	7	381	35	233	19		108
samp. W95 81	high-Ti	Galapagos	49.73	3.15	14.78	12.8987		11.61		0.19	6.21	10.85	3.23	0.54	0.38		48.8092	34	379				115		25	7	386	34	228	19		109
samp. W95 82	high-Ti	Galapagos	49.5	3.73	14.01	14.1875		12.77		0.21	5.21	9.66	3.62	0.68	0.49		42.1052	33	420				95		23	7	363	44	283	21		145
samp. W95 83	high-Ti	Galapagos	48.77	3.13	14.29	13.1542		11.84		0.19	6.28	10.99	3.23	0.51	0.37		48.5991	39	358				117		22	4	383	34	218	17		93
samp. W95 84	high-Ti	Galapagos	48.85	2.73	15.18	11.6988		10.53		0.17	7.91	10.9	2.94	0.48	0.34		57.2477	37	330				88		24	5	360	31	200	16		97	15.2	38.1	5.6	26.2	6.63	2.16	6.86	1.07	6.03	1.15	3.03	0.42	2.53	0.39
samp. W95 85	high-Ti	Galapagos	47.97	3.47	13.67	13.4209		12.08		0.2	5.56	10.95	3.18	0.54	0.42		45.0688	30	388				123	107	23	7	393	40	251	19		118
samp. W95 86	high-Ti	Galapagos	48.97	2.71	15.67	11.4988		10.35		0.17	6.64	11.54	3	0.43	0.33		53.3497	33	302				100	91	21	4	378	31	194	15		78
samp. NSK97-09	high-Ti	Galapagos	48.54	3.03	14.61	12.8876		11.6		0.18	7.19	11.52	2.59	0.41	0.32		52.4917	36	356	298	81					6	336	29	155	20.5	0.08	85	13.85	30	4.27	20.09	5.74	2.09	6.05	1.05	5.99	1.18	2.96	0.4	2.4	0.35	4.02	1.5	1.76
samp. NSK97-201	high-Ti	Galapagos	49.2	3.5	14.24	12.6987		11.43		0.186	6.45	11.29	2.85	0.49	0.366		50.1475	36	388	119	54					8	368	28	178	26.2	0.09	33	17.77	49	5.22	23.23	6.51	2.25	6.4	1.11	6.41	1.29	3.17	0.42	2.51	0.37	4.57	1.88	1.74
samp. NSK97-202	high-Ti	Galapagos	49.39	2.5	15.87	10.7323		9.66		0.168	7.63	11.88	2.36	0.31	0.245		58.4715	35	309	323	97					6	311	23	126	17.4	0.06	35	10.51	42	3.22	15.62	4.5	1.6	4.74	0.8	4.69	0.93	2.27	0.31	1.82	0.27	3.06	1.08	0.97
samp. NSK97-204	high-Ti	Galapagos	49.47	2.47	15.69	11.0322		9.93		0.164	7.34	11.84	2.53	0.32	0.243		56.8526	33	302	311	87					6	313	23	126	16.6	0.05	13	11.1	32	3.47	16.04	4.54	1.69	5	0.87	4.99	1.01	2.5	0.34	1.99	0.3	3.34	1.17	1
samp. NSK97-206	high-Ti	Galapagos	49.61	2.58	15.52	10.9211		9.83		0.17	7.5	11.89	2.34	0.32	0.249		57.6282	34	316	288	87					6	304	23	128	17.3	0.06	37	10.39	36	3.24	15.19	4.48	1.61	4.69	0.79	4.76	0.93	2.35	0.33	1.85	0.28	3.12	1.08	0.94
samp. NSK97-211	high-Ti	Galapagos	49.26	3.15	14.53	12.6321		11.37		0.185	6.57	11.36	2.78	0.46	0.336		50.7399	32	353	166	55					7	333	30	175	24.6	0.08	49	15.24	33	4.55	21.23	5.98	2.11	6.12	1.04	6.02	1.14	2.94	0.41	2.41	0.36	4.27	1.49	1.33
samp. NSK97-213	high-Ti	Galapagos	48.36	3.1	15.67	12.7098		11.44		0.18	6.21	11.49	2.76	0.44	0.33		49.1778	30	355	181	52					6	341	30	171	22.6	0.09	87	15.11	41	4.65	21.89	6.28	2.21	6.57	1.12	6.55	1.27	3.21	0.45	2.6	0.39	4.43	1.57	1.52
samp. NSK97-214	high-Ti	Galapagos	49.44	3.12	14.77	12.5543		11.3		0.187	6.41	11.6	2.46	0.39	0.315		50.278	33	366	155	49					6	321	29	155	21	0.07	37	14.1	38	4.23	19.54	5.77	2.04	6.01	1.03	6.08	1.21	3.04	0.41	2.46	0.36	4.15	1.5	1.31
samp. NSK97-215	high-Ti	Galapagos	48.54	2.72	13.95	11.5766		10.42		0.175	10.39	10.68	2.49	0.36	0.269		63.9958	35	327	643	226					7	302	24	135	18.3	0.06	40	11.83	22	3.66	17.11	4.88	1.78	5.09	0.87	5.13	0.99	2.46	0.34	2	0.29	3.35	1.24	1.05
samp. NSK97-216	high-Ti	Galapagos	48.88	3.42	15.05	12.7321		11.46		0.188	5.84	11.34	2.91	0.54	0.376		47.6001	35	383	143	37					9	350	31	196	26	0.08	41	17.88	37	5.27	23.91	6.92	2.37	7.04	1.17	6.94	1.37	3.42	0.47	2.8	0.41	4.96	1.75	1.64
samp. NSK97-220	high-Ti	Galapagos	48.88	2.47	16.15	10.6878		9.62		0.164	7.17	12.68	2.32	0.31	0.244		57.0557	32	294	341	77					5	327	22	125	16.5	0.05	10	11.45	27	3.35	15.89	4.77	1.7	4.95	0.83	5.09	0.99	2.41	0.34	2.02	0.29	3.36	1.2	1.01
samp. NSK97-224	high-Ti	Galapagos	49.18	3.09	15.71	11.3544		10.22		0.176	6.21	11.75	2.86	0.47	0.337		51.9959	35	357	186	51					10	344	29	171	23.8	0.09	58	15.68	43	4.72	21.58	6.26	2.1	6.32	1.07	6.3	1.21	3.1	0.43	2.48	0.37	4.34	1.51	1.35
samp. NSK97-228	high-Ti	Galapagos	48.9	3.13	16.08	11.9099		10.72		0.18	5.81	11.45	2.92	0.48	0.338		49.1384	30	351	185	37					5	354	29	172	22.3	0.08	29	15.46	45	4.65	21.46	6.13	2.18	6.5	1.09	6.4	1.25	3.21	0.44	2.57	0.38	4.5	1.59	1.36
samp. NSK97-229	high-Ti	Galapagos	49.14	2.69	15.59	11.7988		10.62		0.175	6.43	12.09	2.6	0.38	0.271		51.9065	33	330	187	57					5	335	26	145	17.3	0.05	29	13.15	35	3.87	17.93	5.36	1.86	5.39	0.94	5.57	1.1	2.75	0.37	2.16	0.33	3.81	1.3	1.18
samp. NSK97-232	high-Ti	Galapagos	49.53	2.42	16.15	10.6989		9.63		0.168	6.77	12.33	2.46	0.31	0.237		55.6182	34	316	242	62					4	315	23	124	15.6	0.04	26	10.93	35	3.35	15.44	4.45	1.61	4.85	0.83	4.92	0.97	2.45	0.32	1.94	0.29	3.18	1.08	0.95
samp. SG93-16	high-Ti	Galapagos	49.34	2.72	15.54	11.6099		10.45		0.176	6.52	12.09	2.5	0.38	0.272		52.6559	38	330	193	58					6	330	25	146	19.3	0.07	40	12.88	17	3.79	17.71	5.02	1.84	5.32	0.92	5.47	1.04	2.59	0.36	2.07	0.31	3.59	1.23	1.14
samp. G192-26	high-Ti	Galapagos	48.83	3.2	15.62	12.5876		11.33		0.175	5.9	11.14	2.95	0.5	0.355		48.1399	28	334	163	38					9	364	33	185	26.2	0.1	76	16.73	46	4.94	22.6	6.41	2.18	6.4	1.07	6.52	1.26	3.34	0.45	2.54	0.38	4.23	1.55	1.3
samp. G192-27	high-Ti	Galapagos	48.96	3.32	15.11	12.3988		11.16		0.187	6.13	11.34	2.93	0.49	0.36		49.4731	38	382	172	41					7	337	30	179	24.5	0.1	60	16.36	36	4.95	23.22	6.67	2.34	7.03	1.17	7	1.37	3.38	0.47	2.75	0.41	4.7	1.62	1.55
samp. NSK97-238	high-Ti	Galapagos	48.4	2.13	14.85	11.8544		10.67		0.178	10.22	10.25	2.74	0.31	0.242		63.0642	34	246	495	241					5	234	29	139	11.1	0.05	27	9	26	2.99	14.86	4.9	1.79	5.61	0.94	5.86	1.12	2.93	0.39	2.37	0.35	3.53	0.65	0.76
samp. NSK97-246	high-Ti	Galapagos	47.26	2.25	16.95	11.9099		10.72		0.18	7.93	11.21	2.92	0.3	0.281		56.8714	31	266	174	111					4	312	27	143	14	0.04	29	10.32	36	3.41	16.4	4.95	1.78	5.52	0.94	5.63	1.12	2.89	0.4	2.44	0.37	3.55	0.79	0.76
samp. NSK97-126	low-Ti	Galapagos	47.09	1.13	17.11	10.0434		9.04		0.16	11.16	11.33	2.49	0.34	0.15		68.7561	38	217	447	239					4	229	23	82	11.8	0.06	66	6.95	8	1.94	9.04	2.82	1.08	3.43	0.67	4.31	0.96	2.73	0.39	2.48	0.39	2.06	0.63	0.99
samp. NSK97-252	low-Ti	Galapagos	47.3	1.01	16.77	9.81013		8.83		0.165	11.17	12.37	2.16	0.12	0.104		69.2778	40	228	481	211					3	173	21	66	5.2	0.02	28	3.38	9	1.31	6.79	2.4	0.96	3.16	0.61	4.08	0.89	2.56	0.37	2.36	0.37	1.65	0.25	0.24
samp. NSK97-254	low-Ti	Galapagos	47.44	0.98	16.4	10.0434		9.04		0.17	11.8	11.55	2.31	0.19	0.112		69.9413	40	210	479	259					3	173	21	67	6.5	0.04	44	4.31	14	1.36	6.58	2.18	0.89	2.84	0.55	3.87	0.83	2.37	0.34	2.32	0.36	1.54	0.31	0.37
samp. NSK97-260	low-Ti	Galapagos	46.78	1.75	14.3	10.099		9.09		0.172	13.21	11.68	2.29	0.54	0.193		72.149	35	255	824	329					12	330	21	88	17.1	0.13	170	11.38	30	2.66	12	3.37	1.23	3.75	0.65	4.16	0.85	2.19	0.32	1.87	0.29	2.03	0.97	0.98
samp. NSK97-262	low-Ti	Galapagos	48.19	1.85	16.16	10.8878		9.8		0.174	8.48	11.72	2.88	0.55	0.201		60.6683	37	296	273	118					10	301	22	89	17	0.12	170	9.92	26	2.33	10.35	3.12	1.15	3.78	0.67	4.35	0.88	2.31	0.34	2.07	0.31	2.1	0.84	0.86
samp. SG93-19	low-Ti	Galapagos	46.7	1.74	14.16	10.5434		9.49		0.176	13.64	11.25	2.17	0.48	0.19		71.9268	34	264	828	336					9	338	22	93	16.2	0.14	145	11.99	26	2.69	11.88	3.39	1.22	3.69	0.66	4.14	0.82	2.41	0.31	1.85	0.3	1.85	0.91	0.89
samp. SG93-22	low-Ti	Galapagos	46.4	1.67	14.39	10.8656		9.78		0.169	13.3	10.6	2.66	0.83	0.218		70.7958	33	247	698	324					20	390	21	91	23.5	0.23	257	15.96	18	3.04	12.45	3.24	1.18	3.5	0.64	4.03	0.82	2.34	0.32	1.96	0.32	1.8	1.22	1.3
samp. SG93-23	low-Ti	Galapagos	47.13	1.27	14.04	10.1656		9.15		0.164	13.54	10.8	2.79	0.89	0.223		72.5111	33	233	1035	346					20	372	19	83	24	0.19	443	16.42	36	2.89	11.08	2.74	0.95	2.85	0.52	3.32	0.68	2.03	0.27	1.68	0.26	1.58	1.3	1.44
samp. SG93-1	high-Ti	Galapagos	47.97	2.28	15.47	11.4988		10.35		0.174	7.83	12.67	2.59	0.41	0.256		57.4208	39	321	356	117					6	348	24	141	24.3	0.04	95	15.95	59	4.14	18.79	4.93	1.71	5.08	0.85	4.98	0.95	2.42	0.34	2.03	0.31	3.31	1.33	1.42
samp. SG93-5	high-Ti	Galapagos	48.09	2.04	14.79	11.0656		9.96		0.175	10.2	11.75	2.45	0.34	0.21		64.6085	37	288	508	201					6	284	22	113	17.8	0.06	77	12.02	40	3.4	15.49	4.42	1.56	4.73	0.8	4.88	0.95	2.4	0.34	1.96	0.3	2.97	1.01	1.08
samp. SG93-7	low-Ti	Galapagos	50.93	1.45	13.6	10.5212		9.47		0.155	11.84	9.9	2.34	0.18	0.137		69.0278	30	189	583	356					5	182	17	77	9.1	0.04	38	5.75	17	1.82	8.87	3.05	1.13	3.6	0.64	3.77	0.75	1.93	0.26	1.55	0.23	2.1	0.52	0.57
samp. SG93-8	high-Ti	Galapagos	48.89	2.66	15.49	11.3544		10.22		0.185	7.03	11.28	3.23	0.66	0.35		55.08	35	326	227	97					13	358	29	178	28.8	0.13	107	20.8	49	5.61	24.86	6.53	2.22	6.68	1.08	6.56	1.26	3.2	0.44	2.63	0.39	4.6	1.79	1.99
samp. SG93-12	high-Ti	Galapagos	49.08	3.4	14.34	13.7431		12.37		0.216	5.72	10.24	3.44	0.78	0.416		45.1839	34	412	90	46					15	356	35	211	36.4	0.18	138	25	75	6.55	28.9	7.74	2.59	7.71	1.27	7.77	1.48	3.74	0.51	3	0.45	5.45	2.19	2.35
samp. SG93-13	high-Ti	Galapagos	49.12	2.53	15.14	11.4655		10.32		0.181	6.85	12.15	2.89	0.53	0.285		54.1958	37	330	119	74					11	329	26	152	23.3	0.12	105	16.73	41	4.51	19.98	5.49	1.9	5.75	0.95	5.61	1.08	2.69	0.37	2.18	0.34	3.9	1.5	1.57
samp. SG93-15	high-Ti	Galapagos	48.88	2.4	15.43	11.1878		10.07		0.173	7	12.5	2.78	0.52	0.267		55.3399	41	309	138	86					11	342	24	143	22.2	0.11	92	16	46	4.32	19.64	5.35	1.84	5.58	0.92	5.54	1.08	2.64	0.37	2.13	0.32	3.68	1.42	1.52
samp. G192-10	high-Ti	Galapagos	48.39	3.73	13.97	15.2096		13.69		0.223	5.31	9.9	3.59	0.78	0.433		40.878	30	422	46	27					16	374	39	226	40	0.16	160	26.32	60	6.91	30.59	8.01	2.71	8	1.33	7.83	1.55	3.88	0.54	3.22	0.48	5.72	2.32	2.48
samp. CA90-15	high-Ti	Galapagos	48.73	2.16	15.61	11.2433		10.12		0.17	7.2	12.51	2.82	0.46	0.23		55.913	41	313	147	73					9	342	25	135	5.71	0.09	80	14.56	31.33	4.03	18.4	5.07	1.79	5.3	0.88	5.2	1.02	2.68	0.35	2.07	0.31	3.45	3.54	1.06
samp. G192-1	low-Ti	Galapagos	47.44	1.72	16.13	11.7766		10.6		0.171	10.55	9.84	3.08	0.22	0.255		63.9532	30	198	406	236					2	374	26	158	6.2	0.03	0	7.92	50	3	14.62	4.37	1.64	4.48	0.84	5.17	1.04	2.9	0.4	2.38	0.38	3.37	0.36	0.37
samp. G192-2A	low-Ti	Galapagos	48.82	1.78	14.99	11.6433		10.48		0.17	9.72	10.71	2.77	0.33	0.22		62.3112	29	212	362	229					5	259	27	128	9.4	0.05	31	8.66	32	2.76	13.15	4.08	1.56	4.53	0.86	5.3	1.07	3	0.38	2.38	0.36	2.94	0.55	0.54
samp. G192-4	low-Ti	Galapagos	47.19	1.28	16.03	11.4988		10.35		0.163	11.4	10.81	2.46	0.15	0.159		66.2553	34	199	454	234					2	298	21	93	5.7	0.01	1	4.46	19	1.78	8.76	2.93	1.14	3.22	0.6	3.87	0.78	2.24	0.3	1.86	0.28	1.94	0.22	0.22
samp. G192-5	high-Ti	Galapagos	49.33	3.01	13.97	13.5542		12.2		0.195	6.5	11.19	2.86	0.44	0.289		48.711	40	367	158	53					8	296	32	160	25.3	0.08	63	15.63	45	4.68	21.39	6.19	2.21	6.12	1.1	6.56	1.28	3.35	0.43	2.59	0.39	3.94	1.5	1.13
samp. G192-8	high-Ti	Galapagos	49.06	3.36	14.18	14.1208		12.71		0.206	5.99	10.62	3.03	0.49	0.344		45.6551	36	362	104	40					9	302	35	183	28.5	0.1	92	17.94	38	5.31	24.45	6.99	2.46	6.95	1.24	7.25	1.4	3.75	0.5	2.91	0.44	4.53	1.75	1.39
samp. SN91-05	high-Ti	Galapagos	49.4	3.3	13.77	14.3541		12.92		0.21	5.88	10.42	3.19	0.55	0.35		44.7901			84	36					15	294	57	191	34	0.16	194	34.2	73.4	9.4	42.5	11.2	3.6	11	1.88	11	2.21	5.9	0.77	4.68	0.7	6.8	2.5	2.7
samp. SN91-32	high-Ti	Galapagos	48.61	3.98	13.21	16.3206		14.69		0.23	5.11	9.61	3.4	0.7	0.46		38.2747			37	19					12	296	40	227	33	0.14	137	22.2	47.9	6.1	28.1	7.68	2.6	7.5	1.35	8.1	1.58	4.2	0.54	3.29	0.49	4.9	1.7	1.8
samp. SN91-40	high-Ti	Galapagos	48.4	3.68	13.62	15.1207		13.61		0.22	5.68	10.42	3.33	0.61	0.42		42.6587			79	29					11	308	41	203	26.97	0.12	129	21.2	46.3	6.1	28.2	7.68	2.6	7.5	1.35	8.1	1.57	4.2	0.54	3.27	0.48	4.8	1.6	1.6
samp. SN91-60	high-Ti	Galapagos	48.97	3.48	14.13	14.7652		13.29		0.21	5.62	10.59	2.85	0.5	0.36		42.9812	30	385	101	40					15	298	36	192	27.6	0.11	102	19.03	29	5.53	25.68	7.22	2.52	7.76	1.31	7.56	1.47	3.74	0.51	3.04	0.45	5.09	1.89	1.64
samp. G192-17	high-Ti	Galapagos	48.98	2.79	16.61	11.5211		10.37		0.168	5.65	11.88	2.89	0.39	0.266		49.2701	34	331	99	53					11	374	27	166	14.5	0.05	22	12.95	44	4.1	19.02	5.78	2.06	5.75	0.98	5.81	1.14	2.95	0.39	2.25	0.33	3.61	0.91	0.78
samp. W95-25	high-Ti	Galapagos	48.76	2.58	16.65	11.2989		10.17		0.16	6.02	12.09	2.89	0.39	0.28		51.3424	32	311	141	59					3	387	29	178	14.5	0.05	40	12.5	40	4.2	20.31	6.07	2.2	6.54	1.11	6.32	1.22	3.04	0.41	2.43	0.36	4.64	0.92	0.85
samp. W95-54	high-Ti	Galapagos	48.91	3.3	14.47	13.2431		11.92		0.2	6.17	10.75	3.29	0.58	0.41		47.9897	38	374	105	50					6	374	37	250	18.8	0.07	54	18.39	46	6.09	28.63	8.24	2.82	8.65	1.42	8.17	1.56	3.93	0.53	3.14	0.46	6.38	1.32	1.23
samp. W95-59	high-Ti	Galapagos	49.21	2.92	15.27	11.9321		10.74		0.18	6.45	11.43	2.98	0.47	0.35		51.7035	37	332	130	73					5	380	32	205	16		95	15.76	73	5.7	26.82	6.88	2.26	7.15	1.1	6.22	1.19	3.12	0.42	2.56	0.39	4.04
samp. W95-74	high-Ti	Galapagos	48.21	2.15	18.86	9.83235		8.85		0.14	5.63	12.82	2.74	0.35	0.25		53.1397	29	248	196	65					3	428	25	160	12.4	0.04	50	11.38	37	3.78	18.22	5.39	1.97	5.66	0.95	5.45	1.03	2.56	0.35	2.04	0.3	5.46	0.81	0.74
samp. W95-75R	high-Ti	Galapagos	48.9	2.3	18.2	9.81013		8.83		0.14	5.86	12.39	2.73	0.37	0.28		54.1916	35	273	205	72					3	418	27	170	13		82	15.18	102	5.56	26.21	6.63	2.16	6.86	1.07	6.03	1.15	3.03	0.42	2.53	0.39	3.78
samp. W95-84	high-Ti	Galapagos	48.58	2.88	15.21	12.1877		10.97		0.18	7.09	11.2	3.05	0.5	0.35		53.5337	28	343	248	89					3	374	34	216	17.3	0.06	58	15.74	51	5.22	24.56	7.1	2.49	7.4	1.24	7.06	1.37	3.36	0.46	2.71	0.4	4.39	1.14	1.03
samp. SKV98-108	high-Ti	Galapagos	48.53	2.04	16.84	10.1434		9.13		0.15	6.96	12.77	2.79	0.53	0.26		57.6074	35	247	78	61					8	340	26	143	20.9	0.06	124	15.69	34	4.29	19.68	5.36	1.94	5.62	0.95	5.51	1.08	2.71	0.37	2.2	0.33		1.39	1.66
samp. SKV98-101	high-Ti	Galapagos	48.73	2.51	14.42	13.7431		12.37		0.2	6.31	11.49	3.38	0.32	0.26		47.6249	44	335	132	38					3	221	39	164	12.5	0.05	41	10.01	23	3.62	18.46	6.07	2.23	7.33	1.29	7.65	1.56	4.1	0.57	3.41	0.52		0.76	0.73
samp. CD3286	high-Ti	Galapagos	50.12	2.04	14.51	12.34		11.1035		0.19	7	11.52	3.06	0.24	0.21	-0.32	52.9144	40.6	308			51.2	121	98	19.8	3.6	230	36.2	146	9.3	0	44.7	7.82	21.5	3.17	16.4	5.03	1.84	6.01	1.02	6.33	1.29	3.56	0.52	3.2	0.47	3.6	0.6	0.6
samp. 07DSG82	low-Ti	Galapagos	45.6877	1.57183	15.4155	11.6495		10.4822		0.16898	10.5899	10.3839	2.8052	0.3455	0.30123	0.39	64.2971	30.5614	247.337			63.2866	92.9557	95.5031	18.5924	3.19339	380.708	29.0791	163.19	10.2869	0.0216695	62.9902	10.0666	25.8461	3.57058	16.2486	4.21339	1.61743	5.06134	0.816907	4.98289	1.02714	2.85976	0.416229	2.61897	0.381077	3.39151	0.625759	0.656372
samp. 07DSG84	low-Ti	Galapagos	46.9784	1.40268	16.2493	11.317		10.183		0.16929	10.2447	10.8053	2.46126	0.17634	0.17888	-0.12	64.201	31.603	235.164			58.0502	58.6247	82.6748	16.7412	2.02728	360.75	23.0219	104.673	4.62731	0.0421659	36.7476	5.4247	14.9936	2.23774	10.7576	3.04992	1.25551	3.95778	0.648132	4.04361	0.817853	2.29292	0.329806	2.08199	0.302954	2.52996	0.293262	0.334694
samp. CD3280	low-Ti	Galapagos	48.2591	1.94405	14.5995	12.3402		11.1037		0.16979	10.3173	9.46987	2.69599	0.32611	0.24824	-0.63	62.3542	26.6473	239.932			61.7478	87.1715	107.508	20.5643	6.20525	284.773	31.5195	173.811	12.5607	0.0685617	61.4528	10.7931	26.9264	3.76375	18.6455	5.07199	1.90172	5.97721	0.97808	5.85508	1.15984	3.14395	0.447217	2.70231	0.391928	3.96507	0.779911	0.944766
samp. CD3281	low-Ti	Galapagos	48.4419	1.74856	13.7707	12.0917		10.8801		0.16918	11.1718	10.2904	2.34154	0.24618	0.17455	-0.5	64.6691	36.8716	311.27			77.2103	112.592	109.911	21.1028	4.37965	338.659	30.2812	146.273	10.2826	0.056497	49.2518	8.77874	22.3732	3.3167	16.4173	4.68684	1.75956	5.50399	0.900373	5.39611	1.08765	2.93526	0.419645	2.53815	0.364366	3.51366	0.627874	0.686216
samp. 07DSG65	low-Ti	Galapagos	47.0583	1.66222	14.6953	12.0787		10.8684		0.16585	12.185	10.4638	2.32639	0.22992	0.16806	-0.71	66.6502	31.456	262.79	749.7	298.2	60.93	83.964	93.854	17.587	2.241	270.54	22.407	107.746	8.092	0.008	38.042	6.816	16.777	2.526	12.57	3.485	1.269	4.186	0.672	4.056	0.816	2.186	0.318	1.921	0.277	2.671	0.519	0.529
samp. 07DSG66	low-Ti	Galapagos	46.536	1.84483	13.89	12.5012		11.2486		0.16961	12.0424	10.2711	2.43175	0.24221	0.17999	-0.6	65.6165	35.488	123.985	694	307.9	65.646	105.789	99.173	19.072	4.121	242.573	26.723	128.637	8.012	0.035	39.725	7.456	19.291	2.874	14.751	4.302	1.453	4.861	0.812	4.743	0.941	2.474	0.345	2.107	0.308	3.146	0.519	0.53
samp. 07DSG61	low-Ti	Galapagos	46.8124	1.93112	14.363	12.3983		11.156		0.17267	10.7328	10.5487	2.40097	0.24259	0.19067	-0.63	63.1671	36.302	125.347	655.2	261	63.038	106.97	100.471	19.913	4.497	251.384	28.258	133.64	8.437	0.042	44.316	7.984	20.257	3.045	15.553	4.552	1.52	5.2	0.859	5.001	0.994	2.594	0.363	2.204	0.322	3.31	0.547	0.572
samp. 07DSG64	low-Ti	Galapagos	46.9614	1.9574	14.5178	12.3332		11.0974		0.17586	10.2148	10.7613	2.4461	0.26046	0.18613	-0.72	62.1328	35.757	283.595	662.5	231.5	54.423	101.034	99.8	18.703	4.344	242.183	26.443	130.175	8.616	0.036	37.211	7.307	18.756	2.837	14.327	4.062	1.436	4.828	0.772	4.675	0.926	2.446	0.353	2.159	0.307	3.187	0.536	0.574
samp. 07DSG63	high-Ti	Galapagos	45.258	2.64798	15.1564	13.7922		12.4103		0.1845	8.57107	9.23111	3.16128	0.45233	0.32796	0.71	55.1797	29.737	257.467	258	188	54.32	73.057	128.356	22.381	8.057	315.846	37.255	211.421	16.047	0.077	72.333	13.653	32.345	4.756	22.998	6.157	2.105	7.1	1.119	6.594	1.295	3.474	0.497	3.008	0.434	4.775	0.979	1.116
samp. 07DSG74	low-Ti	Galapagos	46.691	1.24846	16.7979	10.8843		9.79369		0.17318	9.54353	12.1964	2.29879	0.07432	0.09491	-0.65	63.4643	47.764	297.569	311.7	164	51.643	106.709	72.894	17.062	0.842	203.954	23.625	70.05	2.626	0.009	11.245	2.878	8.141	1.377	7.405	2.374	0.919	3.262	0.568	3.711	0.811	2.31	0.355	2.254	0.336	1.778	0.179	0.147
samp. 07DSG79A	low-Ti	Galapagos	47.0218	1.30554	17.0858	11.2944		10.1627		0.17456	9.37247	11.8829	2.43655	0.10024	0.1371	-0.3	62.1781	39.174	262.188	266.5	168.8	53.226	113.76	76.151	17.407	0.997	220.5	23.796	84.415	3.624	0.013	16.693	3.7	10.13	1.678	8.757	2.607	1.007	3.392	0.587	3.781	0.812	2.284	0.347	2.217	0.328	1.971	0.228	0.159
samp. PJT01	low-Ti	Galapagos	47.0279	1.29981	17.055	11.0019		9.89948		0.16965	8.96452	12.0691	2.44353	0.117	0.12331	0.06	61.7478	30.0468	206.243	214.621	159.6	45.495	104.507	61.288	15.674	1.6964	251.222	21.1752	77.5786	2.90393	0.0362414	17.8074	3.61355	10.4003	1.62826	8.74942	2.55688	1.02194	3.50077	0.589035	3.7934	0.787751	2.3127	0.332159	2.1227	0.307183	1.84217	0.208442	0.223899
samp. PJT02	low-Ti	Galapagos	46.2338	1.29235	16.8876	10.915		9.82129		0.16965	9.26909	12.2911	2.39706	0.10301	0.16622	0.49	62.7194	30.3516	208.379	212.296	163.7	45.0606	93.6195	62.1393	15.5855	1.46706	309.384	21.0856	77.5817	2.90943	0.0243526	18.1821	3.74828	10.7765	1.71821	8.71193	2.58279	1.04355	3.45569	0.592131	3.82364	0.800542	2.312	0.338131	2.14331	0.31331	1.90274	0.203765	0.227769
samp. 07DSG77	low-Ti	Galapagos	46.1401	1.81627	16.4138	12.1235		10.9087		0.1853	8.48192	11.5712	2.69783	0.18257	0.17136	-0.71	58.0892	44.948	311.051	231.343	119.103	50.368	89.355	86.143	19.292	2.296	1.363	28.877	126.683	6.108	0.028	27.096	6.177	16.307	2.62	13.114	3.68	1.348	4.448	0.762	4.735	0.991	2.739	0.414	2.544	0.376	2.93	0.391	0.359
samp. SN510	high-Ti	Galapagos	47.48	4.09	12.97	15.43		13.8839		0.21	5.28	9.79	3.1	0.6	0.42	-0.94	40.402	36	430	79	47.4		151	149	22.9	11.3	299	42.4	248	34.6	0.12	138	21.9	51.3	7.06	30.8	7.67	2.5	8.3	1.31	7.46	1.49	3.99		3.35	0.48	5.58	1.87	2.03
samp. CA9804	high-Ti	Galapagos	47.7	2.33	15.34	11.51		10.3567		0.16	7.64	12.15	2.69	0.51	0.27	-0.73	56.8032	35.8	328	276	149		119	103	19.3	9.37	353	26.6	156	23.1	0.11	134	16.3	36.7	4.9	20.9	5.01	1.68	5.26	0.82	4.66	0.93	2.48		2.07	0.29	3.48	1.2	1.5
samp. FE0101	high-Ti	Galapagos	48.23	3	16.95	11.68		10.5097		0.16	5.87	11.39	2.73	0.45	0.35	-0.55	49.8906	31.7	318	205	64		101	110	22.8	6.77	374	29.5	192	23.2	0.08	104	15.2	36.8	5.16	22.8	5.68	1.92	6.05	0.94	5.35	1.06	2.8		2.3	0.33	4.25	1.31	1.38
samp. FE0104	high-Ti	Galapagos	48.1	3.56	14	13.56		12.2013		0.19	6.12	10.69	2.89	0.51	0.4	-0.54	47.205	39.4	385	178	50.8		120	133	23	9.05	336	37	219	26.3	0.1	117	17.4	41.9	5.91	26.1	6.61	2.19	7.16	1.13	6.42	1.27	3.43		2.84	0.41	4.83	1.47	1.61
samp. FE0105	high-Ti	Galapagos	47.75	3.34	14.88	12.5		11.2475		0.17	5.79	11.04	2.91	0.5	0.38	-0.65	47.8526	32.4	369	155	58.1		121	215	22.8	6.64	338	31.8	219	26.1	0.07	111	16.8	40.9	5.71	25.1	6.26	2.07	6.65	1.04	5.82	1.16	3.07		2.51	0.36	4.8	1.46	1.52
samp. FE0602	high-Ti	Galapagos	47.82	3.34	13.81	13.25		11.9223		0.18	6.41	10.98	2.8	0.47	0.36	-1.01	48.9379	40.2	385	161	59.4		126	128	22.4	8.41	325	35.2	209	24.8	0.1	107	16.4	39.5	5.56	24.6	6.25	2.07	6.8	1.07	6.11	1.22	3.26		2.73	0.39	4.63	1.4	1.48
samp. 07DSG39	high-Ti	Galapagos	46.4454	2.44059	15.3435	13.4043		12.0612		0.19576	8.03315	10.9099	2.91324	0.28844	0.29542	-0.65	54.2807	38.886	319	206	99	51.286	82.456	107.895	21.173	4.519	279.17	37.405	164.226	9.891	0.024	47.379	9.386	24.219	3.605	18.177	5.181	1.734	6.029	1.048	6.307	1.306	3.541	0.524	3.216	0.478	3.823	0.654	0.652
samp. 07DSG46b	high-Ti	Galapagos	46.7923	2.5314	15.8745	13.6528		12.2848		0.19943	7.01229	10.7505	2.68391	0.27736	0.32544	0.27	50.4342	31.1	266.92	195	100	44.73	67.79	103.16	19.47	3.76	315.52	33.33	154.35	8.98	0.05	49.01	9.46798	24.0722	3.64539	18.1182	4.89475	1.82973	6.25763	1.0298	6.21717	1.27259	3.54034	0.513297	3.22827	0.473455	3.64	0.63	0.71
samp. 07DSG60	high-Ti	Galapagos	47.0697	2.3517	15.3356	12.8591		11.5706		0.17619	9.61919	10.3226	2.62434	0.3736	0.27016	-0.53	59.7091	30.785	302.553			57.587	62.953	119.235	20.841	5.856	327.607	27.6	156.392	14.983	0.063	66.698	11.492	27.607	3.868	18.37	4.776	1.64	5.422	0.838	4.987	0.977	2.586	0.366	2.212	0.319	3.716	0.931	0.924
samp. 07DSG79B	low-Ti	Galapagos	46.6743	1.40877	16.5993	10.916		9.82224		0.17082	9.02378	12.3056	2.34484	0.07231	0.09612	-0.5	62.0878	42.743	284.709	256	138	51.253	93.684	78.14	16.985	0.88	213.874	27.095	84.963	2.509	0.016	11.458	3.115	8.925	1.596	8.621	2.804	1.081	3.789	0.654	4.239	0.903	2.537	0.385	2.395	0.354	2.081	0.175	0.152
samp. 07DSG80	high-Ti	Galapagos	46.9089	2.49503	16.0695	13.2668		11.9375		0.17429	8.28111	10.1112	2.86617	0.49111	0.31112	-0.59	55.2891	29.006	288.618	154	134	52.766	63.741	119.02	22.005	8.196	336.965	31.223	177.379	16.863	0.083	69.623	12.678	29.175	4.217	19.896	5.17	1.764	5.855	0.909	5.361	1.055	2.813	0.4	2.427	0.347	4.066	1.027	1.071
samp. 07DSG61	low-Ti	Galapagos	46.8124	1.93112	14.363	12.3983		11.156		0.17267	10.7328	10.5487	2.40097	0.24259	0.19067	-0.63	63.1671	36.302	125.347	655.2	261	63.038	106.97	100.471	19.913	4.497	251.384	28.258	133.64	8.437	0.042	44.316	7.984	20.257	3.045	15.553	4.552	1.52	5.2	0.859	5.001	0.994	2.594	0.363	2.204	0.322	3.31	0.547	0.572
samp. 07DSG67	low-Ti	Galapagos	46.9984	1.90512	16.7255	12.1905		10.9691		0.17046	8.67221	10.6919	2.87804	0.30396	0.23975	-0.34	58.4945	43.314	261.55	267	153	51.106	102.728	75.854	17.409	2.749	247.993	24.951	100.518	5.138	0.03	31.724	5.852	13.563	2.108	10.196	2.87	1.073	3.637	0.625	3.933	0.838	2.351	0.354	2.238	0.332	2.337	0.327	0.454
samp. 07DSG70	high-Ti	Galapagos	45.9702	2.35442	15.8347	13.0352		11.7291		0.17655	8.63093	10.3486	2.81587	0.36662	0.26564	-0.54	56.7422	30.805	303.895	203	131.5	53.251	68.124	114.177	21.474	5.206	337.638	30.043	160.361	15.643	0.056	66.249	12.182	28.31	4.103	19.076	5.135	1.726	5.626	0.88	5.155	1.033	2.707	0.391	2.341	0.336	3.827	0.959	0.963
samp. 07DSG71	low-Ti	Galapagos	45.9062	1.39436	16.7672	11.1334		10.0178		0.16743	9.11898	12.6104	2.29371	0.06271	0.0998	-0.07	61.8706	46.31	287.747	222	154	51.406	113.822	72.03	16.723	0.518	236.635	23.561	76.004	2.515	0.007	12.399	2.859	8.6	1.511	8.137	2.629	1.024	3.512	0.596	3.801	0.805	2.249	0.338	2.108	0.31	1.903	0.165	0.111
samp. 07DSG72	low-Ti	Galapagos	46.9685	1.4235	16.5884	11.6771		10.507		0.1758	9.82914	11.6467	2.31343	0.11532	0.12327	-0.66	62.5127	41.297	293.842	343	191	55.115	126.916	82.497	17.724	1.389	237.976	24.327	86.704	3.777	0.016	17.192	3.969	10.9	1.821	9.464	2.874	1.101	3.702	0.632	4	0.847	2.328	0.352	2.17	0.317	2.148	0.241	0.199
samp. 07DSG73	low-Ti	Galapagos	46.8334	1.41889	17.1231	11.2026		10.0801		0.17166	9.20118	12.3723	2.32742	0.06943	0.11846	-0.64	61.9359	45.757	299.517	234	156	53.637	114.314	78.373	17.384	0.814	235.255	24.477	80.191	2.729	0.009	12.701	2.939	8.975	1.559	8.256	2.695	1.046	3.574	0.614	3.916	0.83	2.31	0.352	2.178	0.318	1.992	0.176	0.134
samp. 07DSG74	low-Ti	Galapagos	46.691	1.24846	16.7979	10.8843		9.79369		0.17318	9.54353	12.1964	2.29879	0.07432	0.09491	-0.65	63.4643	47.764	297.569	311.7	164	51.643	106.709	72.894	17.062	0.842	203.954	23.625	70.05	2.626	0.009	11.245	2.878	8.141	1.377	7.405	2.374	0.919	3.262	0.568	3.711	0.811	2.31	0.355	2.254	0.336	1.778	0.179	0.147
samp. PJT02	low-Ti	Galapagos	46.2338	1.29235	16.8876	10.915		9.82129		0.16965	9.26909	12.2911	2.39706	0.10301	0.16622	0.49	62.7194	30.3516	208.379	212.296	163.7	45.0606	93.6195	62.1393	15.5855	1.46706	309.384	21.0856	77.5817	2.90943	0.0243526	18.1821	3.74828	10.7765	1.71821	8.71193	2.58279	1.04355	3.45569	0.592131	3.82364	0.800542	2.312	0.338131	2.14331	0.31331	1.90274	0.203765	0.227769
samp. 08DSG02	low-Ti	Galapagos	47.7324	1.22946	16.8892	10.8053		9.72259		0.16833	9.17942	12.2013	2.36774	0.07853	0.09126	-0.56	62.7282	32.981	268.663	279	147	51.415	100.968	76.608	18.575	1.028	206.544	25.655	74.252	2.833	0.012	16.6	3.416	10.104	1.61	8.701	2.711	1.082	3.609	0.629	4.051	0.876	2.514	0.369	2.401	0.359	1.865	0.186	0.149
samp. 08DSG04	low-Ti	Galapagos	46.2534	1.92758	15.9667	13.2359		11.9096		0.18909	10.0898	10.1526	2.8092	0.17138	0.18306	-0.78	60.1624		260.149	349	215	56.991	81.922	97.052	20.035	2.036	271.06	30.906	130.325	5.926	0.022	31.953	6.546	18.693	2.906	14.772	4.168	1.553	5.033	0.833	5.128	1.081	3.003	0.436	2.804	0.417	2.931	0.38	0.284
samp. 08DSG06	low-Ti	Galapagos	46.8106	1.58637	16.7236	11.2656		10.1368		0.17174	8.89046	11.3045	2.54642	0.15662	0.15017	0.67	60.9895	36.2682	270.739	245	139	56.9449	101.966	85.1224	19.7331	2.16273	304.383	28.068	121.064	5.53324	0.0288268	27.8537	5.91871	16.5221	2.52593	12.5243	3.78007	1.4611	4.60636	0.766865	4.84485	0.999655	2.83503	0.408056	2.53177	0.370578	2.83156	0.351932	0.350425
samp. 08DSG11	low-Ti	Galapagos	47.3403	1.84379	16.7479	12.2881		11.0569		0.18673	8.13134	11.5067	2.78219	0.18224	0.18366	-0.65	56.7274	32.809	284.775	210	102	50.658	90.426	91.06	20.159	2.486	283.477	31.953	134.175	6.362	0.028	38.548	7.661	20.908	3.196	16.008	4.558	1.664	5.426	0.885	5.429	1.129	3.166	0.451	2.9	0.429	3.045	0.398	0.323
samp. 08DSG12	low-Ti	Galapagos	47.3176	1.77452	16.9417	12.3131		11.0794		0.18246	8.47708	11.2368	2.79153	0.16618	0.17438	-0.74	57.697	30.239	269.105	185	113	51.271	83.819	86.742	19.822	2.234	280.547	30.533	125.658	5.837	0.026	34.719	6.935	19.095	2.911	14.685	4.173	1.56	5.087	0.824	5.086	1.06	2.975	0.43	2.736	0.405	2.783	0.357	0.277
samp. 08DSG14	low-Ti	Galapagos	46.7168	1.96977	16.9609	12.7558		11.4777		0.18222	8.36179	10.532	3.07071	0.26216	0.24186	-0.73	56.4964	26.851	240.372	146	115	49.965	69.766	87.434	19.517	3.905	343.413	31.743	156.205	8.974	0.042	53.619	10.116	26.614	3.896	18.833	4.953	1.799	5.673	0.904	5.478	1.124	3.114	0.445	2.832	0.422	3.411	0.542	0.452
samp. 08DSG15	low-Ti	Galapagos	47.2874	1.46118	16.6902	11.3856		10.2448		0.17513	9.08556	11.8326	2.48151	0.10841	0.13781	-0.5	61.2535	37.7724	276.861			56.3174	124.598	82.8402	19.1478	1.29344	270.918	27.0215	103.295	4.48179	0.017736	24.241	4.7847	13.823	2.10236	11.0176	3.42792	1.36681	4.44414	0.737007	4.70964	0.985548	2.75666	0.407621	2.49767	0.370051	2.47251	0.297453	0.245934
samp. 08DSG16	low-Ti	Galapagos	46.6204	1.75917	15.8679	12.5016		11.249		0.193081	9.19496	10.4939	3.07139	0.36705	0.328735	-0.53	59.3015	33.1927	256.586	363	179	55.6171	93.4667	104.093	20.9029	6.01034	309.823	40.4494	253.139	15.9473	0.0911054	74.0657	14.8678	37.6751	5.05421	23.5863	6.29299	2.14147	6.96019	1.13458	7.01245	1.41469	4.04109	0.589959	3.75844	0.557105	5.0963	0.950839	1.04812
samp. 08DSG19	low-Ti	Galapagos	47.0271	1.51411	16.9571	11.2533		10.1257		0.16477	9.344	11.8989	2.41649	0.12586	0.13094	-0.61	62.1923	33.116	283.871	305	160	52.952	98.985	82.74	19.367	1.628	262.173	25.731	91.612	5.019	0.024	30.503	5.414	14.538	2.226	11.36	3.309	1.277	4.146	0.684	4.226	0.89	2.51	0.366	2.33	0.348	2.161	0.321	0.255
samp. 08DSG20	low-Ti	Galapagos	47.352	1.83247	16.2543	12.5853		11.3242		0.19121	8.10047	11.5511	2.6378	0.15835	0.22177	-0.46	56.0463	46.137	335.748	222	116	53.681	108.651	101.45	21.541	1.877	223.01	37.615	137.117	8.732	0.023	42.06	8.335	21.609	3.283	16.206	4.489	1.586	5.704	0.941	6.002	1.275	3.625	0.533	3.399	0.515	3.115	0.531	0.401
samp. 08DSG21	high-Ti	Galapagos	47.6317	2.49252	15.3368	13.0486		11.7412		0.17452	8.86959	10.1088	2.82795	0.46355	0.29329	-0.66	57.3854	31.474	299.124	317	141	54.405	63.672	118.58	23.327	8.708	339.817	33.095	180.559	17.233	0.075	91.158	14.975	35.721	4.976	23.638	6.077	2.094	6.669	1.02	5.913	1.163	3.063	0.422	2.576	0.375	4.224	1.061	1.023
samp. 08DSG22	high-Ti	Galapagos	47.4311	2.4742	15.6286	13.0729		11.763		0.17445	8.6473	10.1997	2.76225	0.42055	0.29153	-0.66	56.7179	33.652	301.091	311	144.5	54.436	62.382	115.996	23.815	7.298	348.504	33.218	176.238	17.119	0.078	88.098	14.444	34.717	4.829	23.202	5.93	2.047	6.539	1.003	5.83	1.151	3.024	0.42	2.565	0.372	4.219	1.048	1.027
samp. 08DSG30	high-Ti	Galapagos	47.6996	2.59052	15.8187	13.2918		11.96		0.17368	8.22648	9.98656	2.8986	0.44608	0.30451	-0.67	55.0789	32.476	300.154	200	128	55.555	63.596	122.909	23.778	7.458	359.566	33.716	186.816	18.012	0.077	93.901	15.145	35.601	5.008	23.671	6.083	2.081	6.704	1.02	5.848	1.155	3.025	0.424	2.572	0.373	4.316	1.094	1.068
samp. 08DSG32	high-Ti	Galapagos	46.8017	2.43105	16.0211	13.1987		11.8762		0.17733	9.604	9.46989	3.11296	0.49689	0.35479	-0.78	59.0421	34.863	258.831	275	226.5	59.64	78.345	115.626	22.407	9.267	363.45	37.439	202.792	19.312	0.087	102.279	16.267	38.451	5.299	24.616	6.248	2.147	6.782	1.07	6.352	1.277	3.484	0.501	3.13	0.467	4.578	1.177	1.249
samp. 08DSG33	high-Ti	Galapagos	46.5934	2.4953	16.0021	13.3724		12.0325		0.17709	9.36996	9.58479	3.05941	0.48766	0.34207	-0.71	58.1263	37.085	267.57	250	202	58.037	77.851	112.251	22.251	8.565	358.59	37.784	198.596	19.059	0.089	100.034	15.627	37.636	5.09	24.1	6.154	2.127	6.799	1.076	6.414	1.299	3.528	0.508	3.172	0.479	4.661	1.19	1.258
samp. 08DSG35	high-Ti	Galapagos	46.6784	2.58989	15.644	13.343		12.006		0.17499	8.3389	9.99503	2.73871	0.38757	0.29754	-0.09	55.3195	36.846	308.023	210	137	57.157	66.791	120.831	23.819	6.409	353.731	35.163	187.322	18.219	0.063	87.615	14.418	34.781	4.783	23.276	6.02	2.067	6.567	1.029	5.98	1.185	3.143	0.434	2.676	0.39	4.562	1.131	1.111
samp. 08DSG37	high-Ti	Galapagos	47.1602	2.60906	15.6752	13.1352		11.8191		0.17329	8.09769	10.1182	2.92454	0.44592	0.29989	-0.71	54.9816	37.637	316.464	231	126	55.984	69.48	121.075	24.332	6.986	366.136	35.18	189.395	18.235	0.071	87.19	14.093	34.886	4.755	23.024	5.86	2.038	6.602	1.028	6.031	1.184	3.137	0.435	2.706	0.396	4.642	1.152	1.147
samp. 08DSG38	low-Ti	Galapagos	46.7824	1.26476	16.7165	11.3654		10.2266		0.17274	9.66687	12.0692	2.37804	0.08546	0.09876	-0.44	62.7563	43.613	306.988	316	186	56.881	101.63	78.312	18.027	1.042	194.767	26.434	66.054	3.077	0.016	18.027	3.154	8.922	1.433	7.592	2.424	0.954	3.336	0.593	3.922	0.876	2.541	0.384	2.492	0.384	2.256	0.199	0.127
samp. 08DSG40	low-Ti	Galapagos	47.327	1.83912	16.8161	12.4298		11.1844		0.17646	8.70915	10.7739	2.83473	0.21475	0.19001	-0.61	58.1254	32.685	286.445			56.834	75.052	99.843	21.358	3.443	310.755	30.638	126.312	7.866	0.037	45.361	7.727	20.436	2.998	14.884	4.097	1.547	5.076	0.825	5.136	1.053	2.919	0.424	2.663	0.397	2.938	0.496	0.433
samp. 08DSG41	low-Ti	Galapagos	47.5652	1.61669	17.0226	11.5351		10.3793		0.17228	8.87465	11.7461	2.63415	0.1346	0.15902	-0.64	60.383	36.525	312.309	297.726	136.8	55.766	113.66	97.589	20.557	1.663	261.818	28.569	104.289	6.731	0.018	33.357	6.111	16.251	2.426	12.124	3.439	1.297	4.282	0.706	4.416	0.941	2.666	0.388	2.481	0.371	2.354	0.408	0.262
samp. 08DSG42	low-Ti	Galapagos	47.0015	1.13604	16.6923	11.1529		10.0354		0.1733	10.3667	11.6162	2.25739	0.07235	0.0872	-0.54	64.8065	38.551	299.204	380	207	61.362	77.851	81.035	18.02	0.714	182.396	25.486	62.601	3.007	0.008	17.608	3.189	8.935	1.421	7.463	2.406	0.926	3.302	0.577	3.798	0.847	2.486	0.375	2.456	0.375	1.592	0.191	0.127
samp. 08DSG43	low-Ti	Galapagos	46.7165	1.23734	16.8904	11.3612		10.2228		0.17252	9.89623	11.9827	2.26568	0.0739	0.09003	-0.26	63.3113	42.96	324.858	297	176	60.47	108.866	83.858	18.982	0.673	211.158	26.82	67.192	3.085	0.012	19.933	3.226	9.294	1.485	7.881	2.542	1.014	3.522	0.613	4.042	0.902	2.607	0.393	2.566	0.39	1.662	0.197	0.126
samp. 08DSG46	high-Ti	Galapagos	47.2846	2.23898	16.245	12.6326		11.3669		0.18242	7.45513	10.8721	2.7638	0.29093	0.24116	0.15	53.8987	33.3298	277.56			53.5436	98.0025	107.46	20.7668	4.69834	324.935	33.6985	158.619	11.7413	0.0597405	53.0118	9.86307	23.8073	3.60271	17.5857	5.41205	1.95357	5.937	0.998279	5.97007	1.21877	3.32198	0.470789	2.90095	0.422924	3.65957	0.703295	0.754206
samp. CD3289	low-Ti	Galapagos	51.497	1.21008	20.5887	6.22564		5.60183		0.091	4.16342	12.218	2.12133	0.20916	0.19632	1.09	56.9867	19.3421	158.091	170.73		26.247	56.538	56.7636	18.8018	3.75717	374.414	20.0018	106.696	14.1208	0.0318298	68.2433	8.73214	20.433	2.82534	13.1116	3.54427	1.32751	3.80259	0.605235	3.59675	0.690719	1.91259	0.270506	1.66402	0.242155	2.60569	0.855945	0.978386
samp. ARU96-1	low-Ti	Caribbean	49	1.18	14.7	11.53		10.3747		0.18	8	11.9	2	0.09	0.091	0.86	57.887			277	102					4	102	24	56	4.6		48	3.59	8.92	1.4	7.25	2.23	0.88	2.72	0.55	3.81	0.77	2.24	0.33	2.31	0.34			0.35
samp. ARU96-2	low-Ti	Caribbean	50.2	1.17	14.8	11.3		10.1677		0.17	8	11.55	2.16	0.21	0.091	0.96	58.3774			294	104					4	81	23	54	4.5		45	3.56	9.2	1.43	7.23	2.36	0.93	2.94	0.6	4.18	0.85	2.46	0.36	2.43	0.37			0.3
samp. ARU96-11	low-Ti	Caribbean	49.3	1.24	13.6	13.13		11.8144		0.21	6.8	8.63	3.81	0.2	0.106	1.68	50.6417			146	79					5	113	26	59	4.6		123	3.35	8.26	1.29	6.91	2.25	0.88	2.85	0.58	4.09	0.85	2.56	0.38	2.62	0.41			0.37
samp. ARU96-21	low-Ti	Caribbean	48.8	0.93	14.1	10.87		9.78083		0.18	10.7	11.53	1.75	0.1	0.068	0.88	66.1029			670	227					2	77	18	46	3.8		35	2.65	6.65	1.02	5.4	1.69	0.71	2.11	0.42	2.92	0.59	1.75	0.25	1.77	0.26			0.25
samp. ARU96-31	low-Ti	Caribbean	50.5	1.14	14.5	11.38		10.2397		0.19	7.9	11.45	2.5	0.07	0.09	0.66	57.8996			251	102					2	91	24	60	4.7		37	3.38	8.35	1.28	6.67	2.06	0.82	2.51	0.52	3.58	0.74	2.18	0.33	2.21	0.33			0.34
samp. 15-146-1	low-Ti	Caribbean	48.06	1.07	14.53	11.01		9.9068		0.17	8.14	13.01	1.87	0.03	0.083	1.49	59.4267		285	341	128	49	145	76	21	0.35	127.71	19.22	52.76	2.82		6.7	2.52	7.04	1.16	6.14	2.12	0.81	2.81	0.54	3.51	0.76	2.14	0.32	2.09	0.31	1.6	0.19	0.2
samp. 150-1	low-Ti	Caribbean	48.27	1.24	16.2	10.05		9.04299		0.1	8.37	9.63	2.54	0.13	0.1	2.48	62.263		335	373	127	53	150	85	17	1.08	118.15	16.38	62.46	3.59		16.03	3.16	8.55	1.36	6.94	2.32	0.89	2.87	0.52	3.36	0.69	1.89	0.28	1.82	0.26	1.92	0.23	0.26
samp. 15-1-1	high-Ti	Caribbean	48.05	3.03	15.63	11.8		10.6176		0.12	6.09	8.35	2.77	1.06	0.282	2.62	50.5548		437	325	115	44	157	124	28	22.1	324.96	28.03	169.51	20.45		51.81	16.07	39.09	5.51	25.11	6.54	2.16	6.76	1.06	6.07	1.17	2.96	0.39	2.42	0.32	4.77	1.31	1.62
samp. 15-1-2_LEACHED	high-Ti	Caribbean	48.21	2.87	14.47	13		11.6974		0.12	6.08	9.26	2.54	1	0.274	2.32	48.0935		407	296	104	41	120	114	25	29.92	307.42	26.55	164.22	19.66		83.47	16.28	39.01	5.42	24.9	6.35	2.11	6.7	1.05	5.96	1.12	2.83	0.39	2.31	0.32	4.69	1.25	1.55
samp. LEG15-2-1_UNLEACHED	low-Ti	Caribbean	48.88	1.67	14.89	12.76		11.4814		0.12	7.32	7.2	3.05	0.92	0.109	1.49	53.1942		435	229	45	52	312	111	17	12.26	115.91	27.37	73.22	1.77		10.6	1.94	6	1.13	6.46	2.76	1.02	3.85	0.75	5.18	1.11	3.15	0.47	3.07	0.45	2.41	0.12	0.11
samp. LEG15-3-1_UNLEACHED	low-Ti	Caribbean	48.15	1.47	14.07	12.69		11.4185		0.22	7.36	11.35	2.31	0.05	0.111	1.66	53.4667		386	133	73	52	173	98	17	0.31	128.43	27.37	70.76	3.84		12.82	3.4	9.5	1.57	8.15	2.88	1.07	3.98	0.74	5.08	1.1	3.1	0.47	3.11	0.47	2.2	0.26	0.27
samp. P104	low-Ti	Caribbean	53.32	1.48	13.59		15.04	13.533		0.22	6.55	8	3.19	0.01			46.3166		359	58	69					0.24	46.21	28.09	66.05	4.74		14.5	3.756	9.992	1.555		2.818	1.028	3.412	0.709	4.783	1.107	3.146	0.491	3.088	0.477	2.1	0.38	0.33
samp. EQ12	high-Ti	Caribbean	54.2	2.1	13.34		16.64	14.9727		0.23	3.1	5.79	4.09	0.13	0.29		26.9579			0						1.61	116.12	51.02	77.07	10.75			9.25	24.49	3.8		6.11	2.19	8.37	1.47	9.56	1.96	5.48	0.77	5.17	0.77	2.49	0.67	0.43
samp. 97VD55	low-Ti	Caribbean	48.86	1.04	8.04		11	9.8978		0.17	13.72	14.63	0.85	0.12	0.07	0	71.1895		455.5	1925	268					1.815	114.78	13.18		3.71		23.708	3.042	8.156	1.316		2.332	0.801	2.38	0.432	2.561	0.538	1.323	0.195	1.067	0.15	0	0.23	0.234
samp. 96VD126*	low-Ti	Caribbean	46.5	1.5	10.79		13.11	11.7964		0.18	11.25	12.2	2.09	0.1	0.15	2.38	62.9632		272.94	1050	454.91					0.63	53.06	9.57	0	0		100	6.98	15.06	2.12		2.5	0.84	2.83	0.47	2.81	0.56	1.36	0.18	1.09	0.14	0	0	0.66
samp. 96VD106	low-Ti	Caribbean	45.5	1.46	11.55		12.17	10.9506		0.2	9.65	10.5	0.73	0.12	0.36	4.71	61.1027		262.63	460	215.23					2.98	392.47	18.49	88.47	15.46		106	8.97	19.57	2.76		3.46	1.24	3.88	0.63	3.89	0.78	2.05	0.27	1.77	0.27	2.7	1.01	0.74
samp. GOR501	low-Ti	Caribbean	44.65	0.61	10.11		12.57	11.3		0.19	22.08	8.91	0.81	0.02	0.03	3.77	77.6942		204	1717	1091	86	97	67	11	0.69	44.17	12	25	0.35	0.01	2.17	0.49	1.85	0.36	2.39	1.08	0.5	1.77	0.32	2.24	0.47	1.29	0.18	1.13	0.18	0.79	0.03	0.04
samp. GOR502	low-Ti	Caribbean	46.07	0.74	13.08		12.64	11.37		0.2	14.53	11.38	1.26	0.04	0.04	3.28	69.4936		253	1076	520	69	121	69	14	0.93	58.5	15	32	0.45	0.02	3.02	0.66	2.32	0.48	3.09	1.4	0.65	2.34	0.43	3.01	0.62	1.74	0.24	1.49	0.24	1.04	0.03	0.04
samp. GOR519	low-Ti	Caribbean	46.9	0.48	12.6		11.76	10.57		0.19	15.58	10.62	1.25	0.59	0.03	5.08	72.4328		241	1134	540	70	95	72	10	3.51	207.82	14	18	0.28	0.02	733.52	0.33	1.05	0.22	1.52	0.84	0.35	1.81	0.33	2.52	0.56	1.57	0.23	1.5	0.23	0.61	0.02	0.02
samp. GOR521	low-Ti	Caribbean	47.89	0.49	13.22		11.72	10.54		0.18	14.44	10.34	1.53	0.16	0.03	4.49	70.9486		242	1326	573	78	148	61	11	1.27	108	14	18	0.28	0.04	136.67	0.31	1.06	0.22	1.52	0.84	0.39	1.69	0.33	2.46	0.55	1.56	0.22	1.47	0.23	0.59	0.02	0.03
samp. GOR525	low-Ti	Caribbean	44.56	0.64	11.17		12.7	11.42		0.2	20.11	9.88	0.68	0.03	0.04	5.19	75.8398		162	5614	956	80	99	66	12	1.17	66.39	12	28	0.38	0.01	2.74	0.53	1.92	0.39	2.52	1.15	0.53	1.86	0.34	2.37	0.49	1.36	0.19	1.19	0.19	0.83	0.03	0.03
samp. GOR537	low-Ti	Caribbean	44.7	0.66	11.62		12.65	11.37		0.19	17.31	10.68	2.08	0.06	0.05	1.7	73.0738		241	1558	776	76	113	74	13	0.87	108.57	14	30	0.42	0.01	5.94	0.63	2.19	0.45	2.87	1.32	0.6	2.14	0.39	2.73	0.56	1.57	0.22	1.35	0.21	0.95	0.03	0.03
samp. GOR538	low-Ti	Caribbean	43.65	0.51	8.72		11.79	10.6		0.18	26.48	8.01	0.59	0.03	0.04	2.72	81.6618		158	2935	1519	90	81	62	9	0.61	40.21	11	22	0.3	0.01	1.49	0.43	1.49	0.31	1.98	0.91	0.41	1.51	0.28	1.92	0.4	1.13	0.16	0.96	0.16	0.68	0.02	0.02
samp. GOR539	low-Ti	Caribbean	44.5	0.62	10.55		12.17	10.94		0.19	20.98	10.05	0.85	0.05	0.04	5.56	77.368		207	1297	1039	81	94	63	11	0.61	91.14	12	27	0.37	0.01	7.75	0.52	1.94	0.39	2.54	1.16	0.51	1.86	0.33	2.3	0.48	1.31	0.18	1.14	0.18	0.82	0.03	0.03
samp. GOR520	low-Ti	Caribbean	48.22	0.55	14.84		11.89	10.69		0.19	9.51	13.01	1.69	0.04	0.04	1.81	61.3275		276	422	165	53	140	67	14	0.39	73.61	18	25	0.39	0.01	95.59	0.42	1.44	0.29	1.93	1.04	0.49	2.03	0.4	2.98	0.67	1.87	0.27	1.8	0.28	0.75	0.03	0.03
samp. GOR512	low-Ti	Caribbean	45.27	0.3	9.76		11.12	10		0.18	24.44	8.21	0.66	0.07	0.02	3.31	81.3316		162	2105	1173	84	71	64	9	1.76	23.78	12	12	0.08	0.02	4.77	0.08	0.33	0.08	0.67	0.48	0.27	1.14	0.24	1.91	0.43	1.28	0.19	1.18	0.19	0.35	0.01	0.01
samp. GOR513	low-Ti	Caribbean	45.36	0.33	9.98		11.21	10.08		0.18	23.54	8.68	0.66	0.05	0.01	3.52	80.631		170	2119	1116	82	79	62	9	1.37	17.55	11	13	0.11	0.01	0.65	0.12	0.42	0.11	0.81	0.57	0.3	1.3	0.27	2.09	0.48	1.37	0.2	1.29	0.21	0.41	0.01	0.01
samp. GOR514	low-Ti	Caribbean	45.93	0.34	10.3		11.18	10.05		0.18	22.74	8.5	0.63	0.17	0.03	3.81	80.1328		171	2322	1142	82	74	64	9	2.04	29.01	12	13	0.13	0.04	9.23	0.15	0.55	0.13	0.91	0.55	0.28	1.2	0.25	1.98	0.46	1.35	0.21	1.32	0.22	0.4	0.01	0.01
samp. GOR515	low-Ti	Caribbean	44.46	0.27	8.71		10.95	9.84		0.17	27.29	7.73	0.37	0.02	0.02	5.42	83.1757		135	2822	1318	89	56	60	8	0.56	15.53	10	11	0.12		0.66	0.15	0.46	0.11	0.77	0.45	0.23	1	0.21	1.69	0.39	1.18	0.18	1.12	0.19	0.35	0.01	0.01
samp. GOR517	low-Ti	Caribbean	44.58	0.32	8.5		10.94	9.84		0.18	27.87	7.24	0.33	0.03	0.02	6.82	83.4679		148	1542	1322	89	43	60	7		23	8	13	0.3		9
samp. GOR511	low-Ti	Caribbean	46.21	0.84	18.47		11.83	10.64		0.18	8.14	11.59	2.64	0.05	0.06	4.52	57.6942		288	347	119	52	114	52	18	0.98	187.97	18	36	1.11	0.02	12.2	1	3.1	0.58	3.62	1.62	0.76	2.57	0.47	3.22	0.67	1.86	0.26	1.65	0.26	1.14	0.08	0.08
samp. SDB1	low-Ti	Caribbean	47.93	1.17	14.59	12.14		10.9236		0.191	8.21	12.04	3.18	0.22	0.096	2.23	57.2606		276	318	115				15.4	2.2	220	22.3	69	3.3		191
samp. SDB2	low-Ti	Caribbean	48.44	1.22	14.7	12.22		10.9956		0.212	7.8	12.1	3.28	0.21	0.097	1.81	55.8406		292	317	112				15.7	1.9	247	23.1	74	3.5		109
samp. SDB4	low-Ti	Caribbean	48.16	1.4	14.03	13.39		12.0483		0.143	7.59	10.96	4.02	0.14	0.117	1.63	52.896		305	169	87				17.2	1.9	216	28.4	81	5.1		71
samp. SDB5	low-Ti	Caribbean	48.68	1	14.85	11.31		10.1767		0.143	8.34	12.03	3.1	0.19	0.075	1.1	59.3637		311	408	127				15.4	3.4	184	20.1	57	3.6		31
samp. SDB7	low-Ti	Caribbean	49.37	1.26	14.57	11.56		10.4017		0.189	7.19	11.38	4.09	0.15	0.102	1.32	55.2008		286	335	110				16.3	2.8	124	24.2	67	4		44
samp. SDB8	low-Ti	Caribbean	48.5	1.37	14.04	12.67		11.4005		0.223	7.34	12.1	3.01	0.1	0.106	1.47	53.4383	45.2	309	242	95	47			16.8	1.2	228	25.7	82	4.7		33	3.4	10.7		8.4	2.7	1.2	3.3	0.7					2.4	0.4	2.25	0.29	0.33
samp. SDB9	low-Ti	Caribbean	49.32	1.15	14.05	12.63		11.3645		0.169	7.46	7.98	7.03	0.05	0.089	3.99	53.9201		309	236	97				12.7	2.4	39	22.9	50	3.5		15
samp. SDB10	low-Ti	Caribbean	48.27	0.57	13.51	9.65		8.68307		0.171	9.94	14.53	2.05	0.09	0.039	1.39	67.112		220	489	178				13.2	2.2	88	13.3	28	1.2		28
samp. SDB11	low-Ti	Caribbean	49.06	0.98	14.43	10.92		9.82582		0.184	8.35	11.83	2.75	0.59	0.075	0.92	60.2361	57.2	321	250	97	56.7			17.3	5.7	106	19.4	48	3.5		34	1.5	5.5		5.41		0.62		0.32					1.31	0.21		0.08	0.29
samp. SDB12	low-Ti	Caribbean	48.08	1.18	13.86	12.62		11.3555		0.21	7.53	11.55	3.34	0.16	0.088	0.96	54.1717	49.6	315	255	96	46.6			17.5	2	95	24.9	61	3.5		45	2.7	6.2		6.1	1.9	0.8		0.6					2.1	0.32	1.4	0.23	0.4
samp. SDB13	low-Ti	Caribbean	49.85	0.63	13.67	9.24		8.31415		0.177	10.1	13.75	1.48	0.09	0.051	2.1	68.4092	51.7	202	917	226	52.2			13.8	2.4	91	14.4	33	1.3		27	1.5	4.1		3.5	1.3	0.6	5.2	0.4					1.4	0.2	0.91	0.12	0.12
samp. SDB17	low-Ti	Caribbean	51.71	1.2	14.25	11.53		10.3747		0.163	6.9	9	4.75	0.13	0.096	3.42	54.2451		261	228	104				13	3	95	23.8	59	3.6		64
samp. SDB18	low-Ti	Caribbean	50.63	1.47	14.19	13.34		12.0033		0.23	6.77	10.94	2.89	0.15	0.117	1.57	50.1345	46.2	331	208	97	49.9			19.1	2.5	156	29.4	70	4.3		37	3.8	9.8		9.3	2.9	1.1		0.8					2.8	0.43	2.05	0.3	0.3
samp. SDB19	low-Ti	Caribbean	50.85	1.29	14.1	12.99		11.6884		0.166	6.81	11.53	2.6	0.22	0.108	2.89	50.9463		273	157	79				17.4	3.3	186	24.9	73	4.2		283
samp. SDB22	low-Ti	Caribbean	51.26	0.94	14.48	11.07		9.96079		0.223	8.05	11.54	2.8	0.18	0.074	2.1	59.0269		283	342	116				15	2.6	213	20.3	58	3.5		36
samp. SDB24	high-Ti	Caribbean	48.06	2.57	16.15	13.05		11.7424		0.173	7.59	8.41	3.19	0.75	0.258	2.91	53.5363		315	136	88				20.2	7	345	29.7	170	13.3		449
samp. BAR5	low-Ti	Caribbean	51.61	0.85	14.31	10.43		9.38491		0.202	8.63	12.47	1.72	0.07	0.076	1.46	62.1096		252	441	133				14.1	6.9	99	18.1	51	4.5		49
samp. BAR6	low-Ti	Caribbean	52.02	0.94	14.44	10.16		9.14197		0.162	8.22	12.34	2.04	0.27	0.082	1.69	61.58		254	573	143				13.8	2.3	93	17.5	46	4.6		40
samp. BAR7	low-Ti	Caribbean	51.59	0.91	14.41	10.32		9.28594		0.158	8.92	12.44	1.6	0.07	0.078	1.69	63.1314		149	0	2				15.2	47	417	24	76	7.1		918
samp. BAR8	low-Ti	Caribbean	51.93	0.95	14.56	10.5		9.4479		0.091	8.32	13.46	1.04	0.04	0.085	1.78	61.0861		257	70	18				13.2	22.6	390	14.2	59	2.4		654
samp. CBU2	low-Ti	Caribbean	48.95	1.24	14.46	11.61		10.4467		0.233	10.29	10.11	2.56	0.37	0.087	2.97	63.7135		331	261	113				17.3	2.5	137	21.3	58	3.4		138
samp. CBU3	low-Ti	Caribbean	48.87	1.15	15.35	10.8		9.71784		0.225	10.39	10.01	2.2	0.76	0.091	3.01	65.587		336	301	118				16	5.5	159	24.1	61	3.3		229
samp. CBU4	low-Ti	Caribbean	49.07	1.18	15.09	11.41		10.2667		0.2	8.68	11.17	2.57	0.5	0.081	2.71	60.113		328	336	128				16.4	5.8	207	21.6	57	3.2		289
samp. CBU5	low-Ti	Caribbean	48.39	1.1	14.88	11.32		10.1857		0.205	9.25	11.92	2.09	0.77	0.076	2.88	61.8149	48.5	305	522	147	50.5			16.3	6.8	218	19.7	50	2.6		345	2.3	7.3		5.8	2	0.8		0.4					2	0.31	1.65	0.18	0.25
samp. CBU6	low-Ti	Caribbean	48.57	1.25	14.77	11.54		10.3837		0.153	8.29	12.84	2.31	0.17	0.088	3.09	58.7315		333	288	103				16.5	1.6	176	23.2	62	3.3		57
samp. CBU7	low-Ti	Caribbean	49	1.28	15.13	11.88		10.6896		0.182	7.76	11.72	2.78	0.08	0.097	3.02	56.4089		331	240	94				15.5	0.7	187	24.1	66	3.5		67
samp. CBU8	low-Ti	Caribbean	47.9	1.16	15.12	11.25		10.1227		0.19	8.71	13.13	2.11	0.29	0.092	2.71	60.5336	48.2	311	420	129	51.7			15.7	3.6	358	23.2	58	3.4		258	2.8	7.6		6.2	2.24	0.86	3.26	0.58					2.2	0.35	1.7		0.31
samp. CBU9	low-Ti	Caribbean	48.77	1.13	15.14	10.93		9.83481		0.186	8.93	11.77	2.69	0.33	0.087	2.8	61.8114	44.3	299	365	140	46.1			15.6	3	154	22.3	60	3.2		130	2.7	7.5		6.9	2.2	0.9		0.5					2.2	0.26	1.65	0.18	0.23
samp. CBU10	low-Ti	Caribbean	48.19	1.24	14.89	12.11		10.8966		0.18	8.66	12.21	2.29	0.04	0.101	3	58.6212		311	355	117				15.9	1.1	117	24.4	66	3.9		78
samp. CBU11	high-Ti	Caribbean	51.06	1.97	13.12	14.79		13.308		0.205	6.01	6.98	5.07	0.14	0.162	2.17	44.5991	48.2	475	69	67	48			19	1.1	63	38.8	110	7.2		92	5.9	15		12.2	3.9	1.4		0.9					4.1	0.62	3.1	0.45	0.59
samp. CBU12	high-Ti	Caribbean	51.41	1.86	12.5	14.78		13.299		0.249	5.92	7.77	4.62	0.34	0.157	1.69	44.2433	42.3	464	62	56	42.2			15.2	2.7	33	38.3	108	7.6		153	4.9	14.5		13.1	3.8	1.4	5.8	1					4	0.67	3.08	0.46	0.61
samp. PAN2	high-Ti	Caribbean	53.73	1.94	12.65	15.93		14.3338		0.203	5.03	7.54	2.9	0.04	0.192	2.78	38.482		454	13	35				17.6	0.4	74	46.4	128	8.6		35
samp. PAN3	high-Ti	Caribbean	53.9	1.88	12.4	15.99		14.3878		0.213	5.11	7.84	2.69	0.06	0.163	2.7	38.767		490	17	45				17.1	0.1	94	37.9	102	7		34
samp. VIJ1	high-Ti	Caribbean	51.45	2.02	12.85	15.2		13.677		0.185	5.78	9.57	2.29	0.07	0.171	0.9	42.9658	47.6	531	63	58	48			20.2	0.4	89	41.7	119	8		27	6.1	16.6		12.4	4	1.5		0.9					4.3	0.63	3.14	0.48	0.62
samp. VIJ2	high-Ti	Caribbean	51.85	2.02	13.12	15.11		13.596		0.23	6.2	9.15	2.04	0.07	0.177	1.18	44.8394		531	61	57				18.8	0.7	89	41.7	120	8.2		27
samp. VIJ4	high-Ti	Caribbean	51.2	1.98	13.34	14.3		12.8671		0.179	6.5	9.96	2.2	0.07	0.158	1.59	47.3821	48.3	510	85	72	39.5			17.3	0.5	100	39.3	107	7.2		26	5.8	16.4		12.1	3.77	1.42	5.51	0.95					4	0.65	2.97	0.46	0.59
samp. AMA1	low-Ti	Caribbean	54.14	0.91	14.32	10.22		9.19596		0.114	7.66	9.7	2.65	0.06	0.098	0.71	59.7561	36.9	333	204	96	39			14.4	0.5	90	20.8	60	4.1		23	3.2	8.6		6.6	2.1	0.7	2.4	0.5					2.1	0.35	1.73	0.41	0.6
samp. AMA2	low-Ti	Caribbean	50.45	0.87	14.69	10.12		9.10598		0.171	9.15	10.58	2.97	0.77	0.068	2.26	64.1731		298	489	124				12.8	10.3	132	17.7	41	2.7		48
samp. AMA3	low-Ti	Caribbean	50.22	0.88	13.79	10.57		9.51089		0.175	10.3	12.23	1.45	0.08	0.078	1.73	65.8759		282	602	229				13.1	1.4	149	16.4	47	4.5		27
samp. AMA4	low-Ti	Caribbean	49.91	0.92	14.36	10.72		9.64586		0.171	9.06	12.75	1.62	0.3	0.081	1.4	62.6072		291	415	143				13.3	5	139	18.1	48	4.4		62
samp. AMA5	low-Ti	Caribbean	50.11	1.09	14.21	12.03		10.8246		0.205	7.99	12.01	1.96	0.11	0.083	0.07	56.8181		293	403	148				14.9	0	97	19.5	56	5.1		17
samp. AMA6	low-Ti	Caribbean	50.1	0.99	14.37	10.67		9.60087		0.177	9.02	12.05	2.15	0.32	0.085	2.33	62.6131		295	438	144				14.5	4.6	110	17.5	54	5.1		40
samp. AMA8	high-Ti	Caribbean	49.98	2.01	13.98	11.84		10.6536		0.182	7.71	11.52	2.03	0.31	0.181	1.63	56.3328	39.6	352	310	136	45.5			17.3	6.2	238	24.6	125	15.2		82	11.9	28		18.4	4.5	1.6	5.4	0.8					2.1	0.3	3.43	0.92	1.19
samp. AMA9	low-Ti	Caribbean	50.24	0.99	14.36	10.6		9.53788		0.18	8.78	12.85	1.81	0.04	0.087	2.14	62.1347		363	213	110				14	1.5	812	22.4	47	3.4		40
samp. AMA11	high-Ti	Caribbean	50.04	2.21	13.61	12.47		11.2205		0.183	7.28	11.91	1.65	0.15	0.204	0.77	53.6299		359	212	119				19.9	2.4	235	26.8	139	17.2		51
samp. FLO1	low-Ti	Caribbean	50.43	0.99	14.21	10.49		9.4389		0.173	8.43	12.11	2.71	0.2	0.086	1.44	61.4204		304	433	135				14.3	4	125	19	54	4.8		23
samp. FLO2	low-Ti	Caribbean	46.92	0.82	15.23	8.97		8.07121		0.155	7.47	20.04	0.12	0	0.07	3.64	62.2613		257	422	137				19.9	0.3	12	15.4	44	4.1		3
samp. FLO3	low-Ti	Caribbean	49.81	0.94	13.78	10.28		9.24994		0.167	8.98	14.04	1.77	0.1	0.077	0.84	63.3775		285	454	159				14.5	1.6	86	17.5	51	4.6		23
samp. FLO4	low-Ti	Caribbean	49.87	0.94	13.82	10.23		9.20495		0.17	9.27	13.79	1.69	0.06	0.08	1.2	64.2241		286	456	158				14.8	0.7	103	17.2	51	4.7		15
samp. YAN2	high-Ti	Caribbean	49.38	2.02	13.16	18.05		16.2414		0.234	5.23	8.89	2.47	0.18	0.171	1.41	36.4685		558	30	53				19.3	2.3	99	43.2	113	7.1		29
samp. YAN3	low-Ti	Caribbean	50.41	0.81	14.67	10.22		9.19596		0.156	9.4	11.84	2.19	0.17	0.061	1.16	64.5658		294	562	157				13	3.1	96	17.5	41	2.6		21
samp. YAN4	low-Ti	Caribbean	50.86	0.87	14.22	10.54		9.48389		0.179	8.57	13.22	1.39	0.03	0.066	3.59	61.6977		322	404	135				13.6	0.3	85	19	45	2.7		7
samp. YAN6	high-Ti	Caribbean	49.76	1.78	12.66	16.69		15.0177		0.232	4.99	13.04	0.44	0.02	0.148	3.53	37.1981		510	40	57				15.7	0.3	22	38.5	98	6.2
samp. YAN7	low-Ti	Caribbean	48.69	0.97	15	11.58		10.4197		0.215	9.2	12.02	1.84	0.15	0.079	1.36	61.1488		336	426	147				15.3	3.6	98	20.7	50	3.2		50
samp. YAN8	low-Ti	Caribbean	51.28	1.23	13.55	13.35		12.0123		0.205	6.93	9.94	3.07	0.23	0.099	1.5	50.6997	49.1	407	103	82	45.7			15.5	3.1	421	27.7	61	4.3		45	3.5	8.5		7.8	2.4	0.9		0.6					2.8	0.39	1.75	0.31	0.43
samp. BAR2	low-Ti	Caribbean	51.4	1.31	14.52	12.72		11.4455		0.219	7.48	8.9	3.52	0.31	0.102	2.71	53.8102		312	206	105				13.9	5.5	174	25.2	74	3.5		42
samp. LER4	low-Ti	Caribbean	49.73	1.37	13.25	12.63		11.3645		0.183	8.1	10.41	3.76	0.46	0.142	1.9	55.9574		369	394	123				16.3	4.9	219	20.5	69	5.1		149
samp. AZU3	low-Ti	Caribbean	48.99	1.02	8.66	9.89		8.89902		0.161	13.24	15.79	1.26	0.79	0.083	1.61	72.6187		378	747	223				11.7	9.9	263	15.9	41	3		939
samp. ROM5	low-Ti	Caribbean	48.53	1.48	14.62	11.21		10.0868		0.176	9.37	10.65	3.1	0.44	0.196	1.82	62.3482		365	411	210				19.7	6.4	295	23.6	92	8.8		133	5.6	14.3	1.9	10.5	3	1.1	3.7		3.6	0.7	2.1		1.8	0.26
samp. ROM7	low-Ti	Caribbean	46.14	0.91	9.74	12.44		11.1935		0.23	16.64	11.5	1.9	0.22	0.092	2.19	72.6023		325	1556	436				13.5	3.2	40	13.7	46	3.1		52
samp. ROM9	low-Ti	Caribbean	47.27	1.66	14.38	12.94		11.6434		0.191	7.13	12.54	3.34	0.03	0.172	3.27	52.1894		423	150	96				16.7	0.3	83	23.6	93	6		15
samp. ROM10	low-Ti	Caribbean	49.59	1.27	12.43	12.72		11.4455		0.176	9.61	9.47	3.89	0.27	0.103	1.89	59.9474		361	844	186				15.4	3.2	328	20.5	61	4.6		80
samp. AN3	low-Ti	Caribbean	48.1	1.63	13.36		14.5	13.0471		0.23	6.76	10.9	2.03	0.21	0.13		48.0141		392	78	70					3.62	114	36.5	93.5	5.07		21	4.77	12.47	1.93	9.8	3.36	1.2	4.43	0.79	5.09	1.09	3.16	0.46	3.09	0.46	2.49	0.34	0.36
samp. AN18	low-Ti	Caribbean	48.73	0.76	13.22		9.73	8.75505		0.16	10.96	12.92	1.65	0.13	0.05		69.0548		274	890	213					3.41	71	16.6	38	2.09		35	1.81	4.72	0.74	3.99	1.43	0.55	1.95	0.36	2.39	0.53	1.57	0.23	1.5	0.23	0.93	0.14	0.13
samp. AN21	low-Ti	Caribbean	49.8	1.22	13.5		12.37	11.1305		0.22	7.44	10.93	2.26	0.25	0.1		54.3699		382	156	90						91.5		63
samp. AN23	low-Ti	Caribbean	49.66	1.21	13.96		12.44	11.1935		0.21	7.69	10.79	2.42	0.27	0.1		55.049		382.5	155	95					1.34	105.5	27.2	62	4.11		12	3.12	8.27	1.3	6.71	2.34	0.87	3.22	0.6	4.12	0.91	2.75	0.4	2.72	0.4	1.7	0.28	0.29
samp. AN24	low-Ti	Caribbean	47.25	1.21	13.38		12.78	11.4994		0.21	7.49	9.48	3.52	0.05	0.1		53.7264		340	181	114						126		73
samp. AN28	low-Ti	Caribbean	49.54	1.03	14.07		11.37	10.2307		0.19	8.2	11.25	2.25	0.22	0.07		58.8266		318	252	127					1.48	93	21.3	54.5	3.37		37	2.78	7.16	1.1	5.71	1.94	0.73	2.68	0.49	3.26	0.71	2.13	0.32	2.14	0.32	1.45	0.23	0.25
samp. AN36	low-Ti	Caribbean	48.82	1.36	13.95		13.94	12.5432		0.23	7.19	10.82	2.4	0.17	0.1		50.5394		400	104	96						81		76
samp. AN46	high-Ti	Caribbean	48.89	1.8	15.01		11.77	10.5906		0.2	6.87	10.12	3.25	0.13	0.14		53.625		424.5	144	101					1.44	109	44.8	99.5	5.81		36	6.28	17.09	2.69	13.5	4.54	1.61	5.8	1.05	6.64	1.4	4.05	0.58	3.87	0.56	3.36	0.39	0.48
samp. AN52	low-Ti	Caribbean	48.98	0.98	14		11.17	10.0508		0.19	8.33	12.13	2.09	0.23	0.07		59.635		307	225	132					1.94	92	22.4	53	2.97		11	2.58	6.68	1.03	5.3	1.88	0.72	2.62	0.47	3.06	0.68	2.05	0.31	2	0.3	1.41	0.2	0.23
samp. AN53	low-Ti	Caribbean	48.46	0.99	14.22		11.3	10.1677		0.23	8.63	12.61	1.96	0.05	0.08		60.2068		311.5	223	136					0.32	77	20.5	52	3.04		6	2.5	6.53	1.04	5.41	1.85	0.71	2.57	0.48	3.17	0.69	2.07	0.3	2.04	0.3	1.36	0.21	0.22
samp. AN54	low-Ti	Caribbean	48.92	0.98	14.26		11.06	9.95179		0.22	8.58	12.63	1.94	0.07	0.08		60.5813		310.5	223	131						79		48
samp. AN56	low-Ti	Caribbean	48.11	1.41	12.29		13.91	12.5162		0.22	6.06	10.13	2.16	0.09	0.11		46.3253		371	117	84						151		80
samp. AN63	low-Ti	Caribbean	48.78	0.99	13.63		11.46	10.3117		0.2	8.25	11.58	2.15	0.24	0.07		58.7829		305	303	114					1.74	136	21.7	54	3.1		18	2.74	7.03	1.1	5.77	1.99	0.74	2.7	0.49	3.3	0.73	2.18	0.31	2.14	0.32	1.47	0.21	0.23
samp. AN64	low-Ti	Caribbean	49.15	0.97	13.27		11	9.8978		0.18	7.68	10.81	2.58	0.2	0.08		58.0389		309	295	109						162		48
samp. AN71	low-Ti	Caribbean	48.46	0.98	13.82		11.31	10.1767		0.2	8.61	11.21	2.75	0.16	0.07		60.13		308	298	139						144.5		50.5
samp. AN72	low-Ti	Caribbean	49.46	0.96	14.31		10.76	9.68185		0.19	8.23	11.52	2.29	0.31	0.07		60.2429		302	276	125					3.82	126	20	54	3.29		16	2.48	6.71	1.07	5.44	1.87	0.71	2.57	0.47	3.12	0.68	2.07	0.29	1.97	0.3	1.39	0.23	0.25
samp. AN75	low-Ti	Caribbean	48.93	0.91	13.99		10.72	9.64586		0.19	8.83	12.09	2.1	0.21	0.08		62.0033		295	282	118						244		44.5
samp. AN76	low-Ti	Caribbean	48.72	0.75	14.38		10.17	9.15097		0.16	8.66	12.19	1.87	0.34	0.05		62.783		261	296	136					2.27	82	15.5	41	2.13		24	1.96	5.08	0.8	4.07	1.42	0.55	1.94	0.36	2.43	0.53	1.59	0.23	1.57	0.22	0.99	0.15	0.15
samp. AN81	low-Ti	Caribbean	48.89	0.96	13.95		11.42	10.2757		0.22	8.96	11.93	2.14	0.16	0.07		60.8509		314.5	291	132					1.4	95	21.1	52.5	2.88		7	2.44	6.41	1.01	5.2	1.86	0.7	2.54	0.46	3.12	0.67	2.01	0.29	1.97	0.3	1.23	0.2	0.2
samp. AN86	high-Ti	Caribbean	49.48	2.42	13.12		15.27	13.7399		0.23	5.63	8.86	2.68	0.14	0.22		42.2106		544	76	68					1.55	102	55.6	146.5	9.06		35	6.78	19.31	3	15.16	5.12	1.72	6.65	1.18	7.7	1.66	4.96	0.72	4.82	0.73	3.95	0.62	0.62
samp. AN87	low-Ti	Caribbean	48.96	0.76	14.28		10.12	9.10598		0.16	8.69	12.24	1.94	0.34	0.05		62.9788		269	345	138						82		40
samp. AN99	low-Ti	Caribbean	48.98	0.99	14.01		10.84	9.75383		0.31	8.63	11.66	2.59	0.16	0.07		61.1981		318	281	123					1.51	73	23.3	55	3.16		28	2.84	7.42	1.16	6	2.01	0.75	2.75	0.5	3.29	0.72	2.15	0.31	2.07	0.3	1.41	0.21	0.24
samp. AN102	low-Ti	Caribbean	49.25	0.99	13.89		10.89	9.79882		0.35	8.41	10.41	3.26	0.25	0.07		60.4732		325.5	298	128						74		54
samp. AN108	low-Ti	Caribbean	46.78	0.96	13.14		11.15	10.0328		0.18	7.53	11.26	1.57	0.18	0.07		57.2266		289	212	127						207		41
samp. AN110	low-Ti	Caribbean	48.65	1	13.86		11.45	10.3027		0.19	8.41	12.13	1.84	0.1	0.08		59.2685		310.5	306	106					1.11	108	21.2	53.5	3.11		19	2.67	6.93	1.08	5.68	1.92	0.73	2.62	0.49	3.28	0.71	2.13	0.31	2.05	0.31	1.39	0.22	0.25
samp. AN119	low-Ti	Caribbean	48.67	1.62	13.33		14.6	13.1371		0.24	7.08	10.6	2.73	0.28	0.13		48.9976		392	106	71					2.72	120	32.4	86	4.83		23	4.53	11.86	1.86	9.43	3.17	1.15	4.19	0.77	5.09	1.08	3.17	0.46	3.06	0.45	2.39	0.32	0.33
samp. AN121	low-Ti	Caribbean	48.55	1.63	13.2		14.71	13.2361		0.23	6.68	10.56	2.54	0.15	0.13		47.3584		397	72	57						112		88
samp. AN123	low-Ti	Caribbean	48.53	1.61	13.34		14.75	13.2721		0.23	6.51	10.52	2.71	0.27	0.14		46.6486		404	89	71					3.12	125	33.5	92	5.15		22	4.76	12.56	1.98	9.84	3.3	1.22	4.33	0.79	5.25	1.11	3.26	0.46	3.13	0.45	2.41	0.35	0.34
samp. AN124	low-Ti	Caribbean	49.06	1.03	15.3		9.94	8.94401		0.17	8.23	11.37	2.8	0.25	0.09		62.1252		292	307	131					2.12	115	19.3	55	3.41		42	2.95	7.47	1.15	5.72	1.88	0.73	2.49	0.46	3.04	0.64	1.86	0.27	1.79	0.26	1.21	0.23	0.21
samp. AN125	low-Ti	Caribbean	49.45	1.09	14.11		11.38	10.2397		0.19	7.79	10.74	2.88	0.14	0.09		57.5574		322	302	114					1.7	276	21.6	54	3.69		237	3.33	8.31	1.26	6.35	2.05	0.78	2.77	0.51	3.38	0.72	2.08	0.3	1.98	0.29	0.75	0.25	0.19
samp. AN126	low-Ti	Caribbean	49.02	1.25	13.74		13.38	12.0393		0.21	7.42	9.25	3.39	0.37	0.12		52.3499		361	98	85					7.01	130	24.8	65	4.13		382	4.19	10.28	1.56	7.64	2.45	0.92	3.3	0.59	3.87	0.83	2.43	0.35	2.35	0.35	1.52	0.29	0.27
samp. AN127	high-Ti	Caribbean	48.37	2.33	12.46		17.77	15.9894		0.24	4.42	8.74	3.24	0.21	0.19		33.0102		516	28	30					3.68	237	41.3	124	7.26		55	6.86	18.04	2.79	14	4.54	1.66	5.78	1.05	6.77	1.39	4	0.56	3.65	0.54	1.97	0.5	0.28
samp. AN128	low-Ti	Caribbean	49.98	0.8	13.59		9.97	8.97101		0.19	8.71	10.11	3.42	0.24	0.06		63.3796		264	365	126						377		38
samp. BN14	low-Ti	Caribbean	47.84	0.83	14.21		10.69	9.61886		0.17	8.11	12.22	2.37	0.46	0.06		60.0473		274	377	129						113		43
samp. BN17	low-Ti	Caribbean	49.75	1.61	12.74		14.28	12.8491		0.21	6.34	8.81	2.68	1.46	0.13		46.796		386	62	58					12.27	80	28.4	91	5.1		85	4.34	11.61	1.87	9.46	3.22	1.16	4.28	0.77	5.17	1.06	3.01	0.45	2.95	0.44	2.33	0.31	0.34
samp. BN19	low-Ti	Caribbean	50.16	0.88	14.73		9.52	8.5661		0.17	8.6	12.75	1.86	0.16	0.07		64.1531		273	376	156					2.28	87	15.8	47	2.47		11	2.02	5.45	0.87	4.45	1.58	0.6	2.2	0.41	2.76	0.59	1.69	0.26	1.74	0.26	1.15	0.15	0.15
samp. BN20	low-Ti	Caribbean	48.91	1.68	13.3		14.75	13.2721		0.22	6.19	10.38	2.67	0.13	0.15		45.3965		396	75	54						114		93
samp. BN21	low-Ti	Caribbean	49.44	1	14.08		11.06	9.95179		0.18	7.95	11.65	2.29	0.07	0.08		58.7462		306	241	103						208		50
samp. BN22	low-Ti	Caribbean	49.02	1.26	14.51		11.65	10.4827		0.17	7.9	12.33	2.31	0.11	0.1		57.3269		323	253	104						111		65
samp. BN26	low-Ti	Caribbean	48.79	1.66	13.15		14.81	13.326		0.24	6.71	10.36	2.64	0.16	0.13		47.3012		399	75	55						127		91
samp. BN29	low-Ti	Caribbean	48.03	1.44	14.92		12.38	11.1395		0.18	5.56	10.53	2.58	0.15	0.11		47.0824		341	33	37						459		76
samp. BN33	low-Ti	Caribbean	46.14	1.14	13.3		11.71	10.5367		0.21	7.24	11.48	3.06	0.44	0.09		55.0533		325	196	103						265		60
samp. AH1A	low-Ti	Caribbean	48.15	1.05	13.79		11.27	10.1407		0.16	8.24	11.63	1.75	0.06	0.07		59.158		327	345	124						316		47
samp. AH1B	low-Ti	Caribbean	48.58	1.08	14.23		11.25	10.1227		0.17	8.55	12.2	1.87	0.06	0.08		60.0898		321	393	122					0.99	227.5	22.9	53.5	3.96		28	3.22	8.04	1.22	5.95	2.01	0.74	2.7	0.48	3.18	0.69	2.07	0.31	2.02	0.3	1.44	0.27	0.24
samp. AH2	low-Ti	Caribbean	49.03	1.07	13.93		10.96	9.86181		0.17	8.87	12.02	1.9	0.04	0.07		61.5873		321	377	129						92.5		56
samp. AH4	low-Ti	Caribbean	48.76	1.03	13.78		10.89	9.79882		0.19	8.75	12.04	2.01	0.06	0.08		61.4165		308.5	407	139						90.5		53.5
samp. AH5	high-Ti	Caribbean	47.92	2.28	16.24		11.75	10.5727		0.17	5.81	8.94	3.66	0.58	0.21		49.4844		333	74	50					8.71	328	27.4	138	3.88		36	3.59	9.08	1.42	7.07	2.4	0.89	3.22	0.61	4.13	0.9	2.65	0.39	2.61	0.39	1.68	0.27	0.27
samp. AH6	low-Ti	Caribbean	49.15	1.07	13.83		11.04	9.93379		0.19	9.13	11.79	2.22	0.08	0.07		62.0975		312	433	144						93		54
samp. AH8	low-Ti	Caribbean	49.35	0.84	14.46		10.24	9.21395		0.16	8.87	11.55	2.12	0.28	0.06		63.1817		281	400	140					1.5	395	15.3	41	2.39		23	1.9	5.06	0.82	4.19	1.5	0.59	2.1	0.4	2.72	0.58	1.65	0.25	1.69	0.26	1.13	0.21	0.15
samp. BH11	low-Ti	Caribbean	48.73	0.88	14.44		10.33	9.29493		0.18	9.43	11.77	2.29	0.08	0.07		64.3936		280	437	167					0.69	105	15.3	46	2.88		24	2.43	6.32	1	4.96	1.67	0.63	2.3	0.42	2.85	0.6	1.71	0.26	1.73	0.26	1.2	0.17	0.19
samp. TG1	low-Ti	Caribbean	41.27	0.7	4.47		12.21	10.9866		0.17	28.75	4.61	0.34	0.12	0.07		82.3469		152	2189	1573						85		52
samp. TG2	low-Ti	Caribbean	42.36	0.59	4.98		11.41	10.2667		0.17	27.98	5.2	0.42	0.37	0.07		82.9296		156	2846	1564						378		24
samp. TG3	low-Ti	Caribbean	41.35	0.8	4.44		11.28	10.1497		0.16	27.84	4.8	0.17	0.07	0.07		83.0206		143	2393	1585						69		54
samp. TG4	low-Ti	Caribbean	42.03	0.66	4.74		11.51	10.3567		0.17	28.89	4.91	0.29	0.09	0.06		83.2566		143	2543	1606						95		47
samp. TG5	low-Ti	Caribbean	42.02	0.62	5.22		11.24	10.1138		0.16	26.24	5.15	0.06	0.02	0.05		82.2219		148	2447	1385					3.69	95	6.2	39	6.21		82	5.09	10.75	1.4	6.04	1.42	0.48	1.48	0.22	1.36	0.27	0.69	0.1	0.62	0.09	1.08	0.39	0.43
samp. TG6	high-Ti	Caribbean	49.23	3.22	12.96		13.22	11.8954		0.2	6.24	6.76	3.67	0.69	0.27		48.323		409	273	181					14.69	230	32.3	197	23.17		149	18.77	43.83	6.05	26.76	6.95	2.28	6.92	1.07	5.98	1.11	2.85	0.37	2.25	0.31	5	1.55	1.68
samp. TG7	low-Ti	Caribbean	36.45	0.85	12.68		10.08	9.06998		0.15	7.71	11.78	3.3	1.12	0.07		60.2433		269	362	129						59		51
samp. TG8	low-Ti	Caribbean	48.35	1.41	13.16		14.22	12.7952		0.16	5.19	8.68	3.67	1.95	0.1		41.9636		205	188	148					24.66	255	19.2	75	8.86		433	8.18	18.71	2.6	11.51	3.07	1.04	3.29	0.52	3.14	0.64	1.8	0.25	1.58	0.23	2.1	0.61	0.6
samp. TG9	high-Ti	Caribbean	49.49	1.79	12.24		11.83	10.6446		0.18	7.05	7.86	3.45	2.18	0.17		54.1414		299	452	183					38.7	383	21.8	125	24.83		761	24.93	45.52	5.39	21	4.59	1.42	1.37	0.64	3.7	0.71	1.95	0.27	1.76	0.26	3.31	1.67	2.22
samp. BC16	high-Ti	Caribbean	47.13	3.85	13.28		13.62	12.2553		0.18	6.32	10.36	2.11	0.35	0.36		47.8969		401	200	125						457		249
samp. BC17	low-Ti	Caribbean	50.48	1	13.61		11.38	10.2397		0.2	7.97	9.6	3.78	0.04	0.09		58.1144		309	268	119					0.24	155	19.4	53	3.02		22	2.71	7.48	1.21	6.17	2.17	0.79	2.85	0.54	3.54	0.78	2.21	0.33	2.25	0.34	1.58	0.19	0.22
samp. BC18	low-Ti	Caribbean	49.64	1.02	13.91		11.45	10.3027		0.18	7.86	9.8	3.25	0.69	0.08		57.6261		327	179	127						258		53
samp. GO1	low-Ti	Caribbean	56.37	1.29	13.56		13.81	12.4262		0.18	3.2	5.27	4.37	0.45	0.17		31.4623		308	0	0					6.61	149	36	111	4.67		120	5.83	14.65	2.28	11.09	3.73	1.21	4.89	0.94	6.42	1.41	4.16	0.66	4.42	0.68	3.09	0.28	0.64
samp. GO2	low-Ti	Caribbean	51.99	0.98	14.49		11.94	10.7436		0.17	5.98	6.42	5.27	0.41	0.12		49.8043		268	23	33					6.85	202	24.2	70	2.96		96	4.09	9.88	1.55	7.65	2.47	0.85	3.41	0.65	4.33	0.96	2.71	0.41	2.76	0.42	1.85	0.19	0.27
samp. GO3	low-Ti	Caribbean	50.97	0.76	14.38		10.7	9.62786		0.18	7.07	7.73	4.65	0.39	0.08		56.6912		277	78	41						147		47							6.9	2.4												0.23
samp. GO4	low-Ti	Caribbean	48.62	1.21	13.71		11.89	10.6986		0.19	8.17	11.25	2.73	0.22	0.09		57.6499		313	271	117					3.26	147	21	65	3.59		19	2.97	8.22	1.36	6.9	2.4	0.91	3.21	0.58	3.86	0.79	2.23	0.33	2.2	0.33	1.79	0.23	0.23
samp. GO5	low-Ti	Caribbean	50.92	1.14	15.14		12.63	11.3645		0.16	5.47	7.08	4.3	0.3	0.14		46.1787		396	21	36						164		63
samp. BUR4	low-Ti	Caribbean	48.49	0.89	14.21		10.45	9.40291		0.16	8.54	11.87	2.56	0.11	0.07		61.8174		291	390	128					1.28	166	16.7	47	2.66		44	2.35	6.13	0.99	5.1	1.76	0.68	2.39	0.45	3	0.66	1.81	0.28	1.84	0.28	1.27	0.16	0.18
samp. BUR5	low-Ti	Caribbean	48.93	0.85	14.49		10.17	9.15097		0.16	8.77	12.61	1.93	0.11	0.06		63.0774		288	384	121						93		46
samp. BUR11	low-Ti	Caribbean	47.97	1.13	14.43		10.91	9.81682		0.2	8.4	12.05	2.81	0.1	0.09		60.4009		293	319	122						148		59																				0.195
samp. BUR12	low-Ti	Caribbean	49.03	1.24	13.81		12.24	11.0136		0.2	8.25	9.84	3.56	0.38	0.09		57.1788		317	219	96						140		62																				0.196
samp. BUR13	low-Ti	Caribbean	47.96	1.43	14.37		11.97	10.7706		0.21	7.11	12.16	2.79	0.1	0.12		54.0597		359	76	61					0.89	157	24.8	76	3.78		110	3.44	9.74	1.62	8.47	2.89	1.08	3.89	0.7	4.59	0.97	2.64	0.41	2.62	0.39	2.19	0.24	0.27
samp. BUR14	low-Ti	Caribbean	48.26	1.18	13.42		11.8	10.6176		0.17	7.76	10.46	3.7	0.15	0.09		56.5749		318	208	86						170		63																				0.157
samp. TG15	high-Ti	Caribbean	48.69	2.04	14.96		10.77	9.69085		0.16	5.88	7.8	3.21	2.61	0.22		51.96		352	54	85						1328		96
samp. BN10	low-Ti	Caribbean	49.14	0.85	14.25		9.9	8.90802		0.15	8.16	12.26	1.62	0.61	0.05		62.019		274	395	128						85		43
samp. AQ8	high-Ti	Caribbean	47.21	2.71	13.87		12.62	11.3555		0.3	7.18	11.22	2.41	0.46	0.27		52.988		383	295	130					4.64	264	30.4	157	14.76		64	11.47	28.12	4.08	18.95	5.19	1.76	5.74	0.92	5.35	1.05	2.86	0.37	2.35	0.33	4.1	0.99	0.96
samp. AQ10	high-Ti	Caribbean	47.33	2.75	13.55		12.81	11.5264		0.22	6.65	9.7	3.34	0.67	0.26		50.7009		419	227	142						365		157
samp. AQ16	high-Ti	Caribbean	47.21	2.28	13.05		12.88	11.5894		0.18	8.66	10.99	2.24	0.24	0.18		57.1184		324	750	303					2.74	218	23.5	123	12.12		35	8.58	21.43	3.12	14.62	3.99	1.4	4.45	0.73	4.25	0.83	2.27	0.3	1.86	0.27	3.2	0.83	0.72
samp. AQ19	high-Ti	Caribbean	47.82	2.73	13.84		12.48	11.2295		0.19	7.21	11.02	2.52	0.39	0.24		53.3696		356	338	162					5.88	272	31	165	15.67		77	12.06	30.17	4.37	20	5.47	1.82	6.08	0.94	5.5	1.08	2.92	0.39	2.48	0.34	4.24	1.06	1.02
samp. AQ20	high-Ti	Caribbean	46.66	2.39	13.08		12.29	11.0585		0.18	8.41	10.71	2.73	0.52	0.21		57.5489		309	504	234					9.92	215	29.5	131	13.47		64	10.79	26.88	3.73	17.4	4.66	1.6	5.17	0.81	4.65	0.92	2.44	0.32	2.01	0.29	3.45	0.9	0.85
samp. AQ23	high-Ti	Caribbean	46.95	2.88	13.26		13	11.6974		0.36	6.89	9.77	3.42	0.53	0.27		51.219		404	246	120						207		173
samp. AQ28	low-Ti	Caribbean	42.44	1.22	6.16		12.61	11.3465		0.16	27.76	4.65	0.96	0.13	0.11		81.3475		161	1643	1462					2.18	91	11.7	75	7.16		25	5.39	13.08	1.89	8.44	2.29	0.77	2.48	0.39	2.35	0.44	1.14	0.16	0.99	0.14	1.77	0.42	0.45
samp. AQ32	low-Ti	Caribbean	43.91	1.51	9.25		13.65	12.2823		0.17	15.64	6.08	1.88	0.32	0.13		69.4181		216	1528	1091						133		89
samp. AQ39	high-Ti	Caribbean	42.72	2.58	14.71		14.6	13.1371		0.17	6.15	8.33	3.73	1.3	0.24		45.4892		341	84	113						255		171
samp. AQ41	high-Ti	Caribbean	47.5	2.82	13.98		12.49	11.2385		0.2	5.67	9.25	3.69	0.96	0.26		47.3502		342	153	119						627		149
samp. AQ43	high-Ti	Caribbean	47.72	2.56	13.61		12.47	11.2205		0.2	7.28	10.54	3.02	0.23	0.23		53.6299		359	334	146					3.02	241	31.6	149	14.11		58	10.52	26.83	3.78	17.92	4.81	1.64	5.46	0.87	5.13	1.01	2.75	0.38	2.27	0.33	3.72	0.93	0.88
samp. AQ43B	high-Ti	Caribbean	47.09	2.63	13.15		12.76	11.4814		0.21	7.1	9.83	3.76	0.41	0.25		52.4337		377	321	133						192		156
samp. AQ49	high-Ti	Caribbean	45.64	2.87	12.98		13.45	12.1023		0.27	7.01	9.82	3.3	0.74	0.29		50.8		399	286	145						192		175
samp. AQ55	low-Ti	Caribbean	43.45	1.37	7.7		12.55	11.2925		0.17	24.01	5.74	1.16	0.25	0.12		79.1237		189	1684	1123						125		80
samp. AQ62	high-Ti	Caribbean	47.26	2.38	13.88		11.98	10.7796		0.26	7.27	12.18	2.42	0.44	0.2		54.5911		341	462	196					3.96	272	29.7	138	13.3		58	10.93	27.23	3.94	18.23	5.02	1.67	5.51	0.89	5.24	1.04	2.89	0.38	2.43	0.34	3.92	0.89	0.9
samp. AQ66	high-Ti	Caribbean	48.03	2.89	13.64		12.76	11.4814		0.19	6.83	10.43	2.8	0.48	0.26		51.466		375	304	142						295		174
samp. BQ70	high-Ti	Caribbean	48.94	2.26	13.67		11.54	10.3837		0.17	6.59	9.9	3.78	0.55	0.2		53.0806		332	198	87						341		131
samp. BQ71	high-Ti	Caribbean	47.24	2.25	13.96		11.96	10.7616		0.17	6.64	10.49	3.7	0.27	0.18		52.378		338	213	101						340		129
samp. AQ72	high-Ti	Caribbean	48.69	2.22	13.81		11.7	10.5277		0.15	6.26	9.93	4.33	0.14	0.2		51.4555		338	201	96					2.54	286	31.9	119	11.8		18	10.43	24.44	3.48	16.47	4.34	1.52	5.14	0.83	4.91	1.01	2.76	0.38	2.44	0.35	3.17	0.77	0.81
samp. OS2	low-Ti	Caribbean	48.51	1.34	14.25		12.88	11.5894		0.28	7.38	12.35	1.85	0.05	0.09		53.1644		331	162	80					0.41	104	23.6	74	3.64		13	3.44	9.47	1.57	7.92	2.8	1.03	3.71	0.69	4.54	0.96	2.66	0.4	2.67	0.39	2.05	0.25	0.26
samp. OS4	low-Ti	Caribbean	49.1	1.26	14.26		10.52	9.4659		0.21	8.44	11.51	2.63	0.19	0.1		61.3809		327	298	106						166		69
samp. OS6	low-Ti	Caribbean	50.12	1.02	14.85		10.78	9.69984		0.18	6.49	11.11	3.11	0.49	0.08		54.394		307	117	53					11.53	110	24.5	54	0.48		14	1	3.61	0.76	4.58	2.03	0.8	3.13	0.6	4.28	0.92	2.66	0.41	2.72	0.41	1.46	0.03	0.05
samp. OS9	low-Ti	Caribbean	49.15	0.89	13.51		10.04	9.03399		0.16	10.63	11	1.97	0.1	0.07		67.716		272	583	249					1	102	15.3	48	2.66		6	2.25	5.91	0.95	4.75	1.66	0.6	2.24	0.41	2.81	0.59	1.75	0.25	1.68	0.25	1.22	0.26	0.19
samp. OS16	low-Ti	Caribbean	46.26	1.13	15.75		10.72	9.64586		0.2	8.89	13.51	1.77	0.16	0.09		62.1628		268	341	120					0.99	148	23.6	70	2.72		17	2.32	7.05	1.25	6.69	2.44	0.92	3.41	0.62	4.28	0.9	2.62	0.37	2.44	0.35	1.43	0.82	0.14
samp. GOR-92-12	low-Ti	Caribbean	48.24	1.14	14.29	12.24		11.0136		0.18	7.64	13.5	2.89	0.06	0.07		55.2885			33	81					0.63	99.6	25.2	30.6	1.38	0.01	16.7	1.67	5.04	0.93	5.28	2.31	1.18	3.53	0.64	4.08	0.84	2.3	0.34	2.13	0.31	1.04	0.15	0.03
samp. GOR-94-47	low-Ti	Caribbean	48.96	1.14	13.96	14.37		12.9301		0.2	7.27	11.6	2.87	0.02	0.08		50.0565			139	81					0.07	81.8	25.4	57.9	1.24	0.01	13.4	1.44	4.61	0.92	5.41	2.45	1.03	3.75	0.68	4.29	0.87	2.45	0.38	2.27	0.33	1.58	0.12	0.11
samp. GOR-92-13	high-Ti	Caribbean	49.81	1.91	13.47	11.31		10.1767		0.18	8.8	10.59	3.55	0.2	0.18		60.6521			413	167					3.42	237.8	22.3	90.7	14.36	0.02	66.7	10.84	26.64	3.85	16.71	4.25	1.45	4.51	0.71	4.03	0.77	2.06	0.31	1.84	0.27	2.25	0.97	0.89
samp. GOR-94-37	low-Ti	Caribbean	53.99	1.17	13.24	12.11		10.8966		0.18	7.18	9.53	2.86	0.25	0.1		54.0142			139	68					3.43	136.6	24.6	57.1	4.4	0.07	25.3	3.73	9.85	1.55	7.48	2.4	0.88	3.3	0.59	3.8	0.81	2.4	0.38	2.45	0.38	1.61	0.34	0.38
samp. GOR-94-38	low-Ti	Caribbean	52.31	1.2	13.91	12.1		10.8876		0.17	8.9	7.35	3.99	0.04	0.09		59.3027			262	88					0.23	248.5	22.2	50.6	4.02	0.01	10.9	5.94	12.79	1.85	7.75	2.17	0.81	3	0.55	3.46	0.74	2.17	0.34	2.15	0.32	1.42	0.32	0.27
samp. GOR-94-1	low-Ti	Caribbean	47.1	0.7	11.84	12.71		11.4365		0.18	18.04	9.67	0.84	0.04	0.05		73.7661			827	684					1.06	53.4	15.6	32	0.57	0.01	2.8	0.6	2.22	0.47	2.95	1.38	0.59	2.18	0.4	2.57	0.53	1.5	0.23	1.4	0.2	0.92	0.07	0.03
samp. GOR-94-7	low-Ti	Caribbean	48.36	0.48	12.9	11.43		10.2847		0.17	15.21	10.73	1.06	0.05	0.04		72.4991			796	464					0.87	51	15.4	17.2	0.44	0.03	157.7	0.36	1.2	0.25	1.65	0.9	0.42	1.74	0.34	2.36	0.51	1.5	0.24	1.46	0.22	0.55	0.05	0.02
samp. GOR-94-19	low-Ti	Caribbean	45.79	0.63	10.74	12.19		10.9686		0.18	20.86	9.1	0.89	0.03	0.05		77.2215			1830	1079					0.44	122.8	14.2	29	0.48	0	12.8	0.55	2	0.41	2.63	1.22	0.53	1.95	0.35	2.31	0.47	1.34	0.21	1.22	0.18	0.8	0.06	0.15
samp. GOR-94-26	low-Ti	Caribbean	46.36	0.66	11.5	12.24		11.0136		0.18	19.35	9.43	0.81	0.12	0.05		75.7979			1453	860					1.2	112.8	15.5	31.4	0.52	0.01	25.9	0.61	2.17	0.46	2.86	1.34	0.56	21.12	0.38	2.5	0.51	1.44	0.22	1.33	0.19	0.89	0.03	0.03
samp. GOR-94-19	low-Ti	Caribbean	46.45	0.7	11.88	12.44		11.1935		0.18	17.79	10.07	1.11	0.04	0.05		73.9113			1718	805					0.76	155.2	15.2	30.5	0.46	0.01	12.1	0.62	2.17	0.46	2.86	1.33	0.57	2.13	0.38	2.51	0.51	1.45	0.22	1.35	0.2	0.89	0.07	0.04
samp. GOR-94-32	low-Ti	Caribbean	46.72	0.35	10.59	11.26		10.1317		0.17	22.43	8.65	0.56	0.07	0.03		79.783			1937	1005					2.06	21	14.8	12.6	0.25	0.02	1.8	0.28	0.69	0.14	0.92	0.61	0.31	1.43	0.29	2.14	0.49	1.45	0.23	1.44	0.22	0.4	0.03	0.03
samp. GOR-94-35	low-Ti	Caribbean	46.58	0.37	10.57	11.41		10.2667		0.17	21.96	8.42	0.55	0.19	0.03		79.2223			2030	968					2.29	31.9	15	13	0.23	0.03	9.4	0.22	0.57	0.13	0.9	0.65	0.34	1.5	0.3	2.18	0.48	1.44	0.23	1.42	0.21	0.42	0.03	0.03
samp. GOR-152	low-Ti	Caribbean	52.4	0.33	19.8	10.1101		9.1			5.1	7	4.1	0.11			49.9757
samp. GOR-152	low-Ti	Caribbean	51	0.4	18.8	11.11		10			7.5	6.3	3.4	0.12			57.2089
samp. GOR-123	low-Ti	Caribbean	53	0.35	21.6	6.8882		6.2			5	6.8	4.7	0.12			58.9755
samp. GOR-123	low-Ti	Caribbean	49.8	0.31	19.2	10.6656		9.6			8.1	5.7	3.6	0.08			60.0648
samp. GOR-127	low-Ti	Caribbean	48.4	0.48	13.8	10.1101		9.1			9.2	16.1	1.2	0.06			64.3134
samp. GOR-127	low-Ti	Caribbean	48.6	0.46	16.7	8.1103		7.3			7.5	16.2	1.6	0.06			64.682
samp. GOR-156	low-Ti	Caribbean	45.7	0.44	9.8	12.3321		11.1			23.9	8.4	0.6	0.01			79.331																	1.72		2.3	1.11	0.47	1.73		2.15		1.28		1.15
samp. GOR-139	low-Ti	Caribbean	45.1	0.46	10.2	12.3321		11.1			22.9	8.7	0.73	0.02			78.6214
samp. GOR-142	low-Ti	Caribbean	46	0.52	10.5	12.1099		10.9			22.3	8.9	0.71	0.02			78.4804
samp. GOR-145	low-Ti	Caribbean	46	0.53	11.1	12.5543		11.3			20.6	9.3	0.84	0.03			76.4687
samp. GOR-166	low-Ti	Caribbean	46.3	0.53	11.3	12.7765		11.5			19.5	9.8	0.81	0			75.1407
samp. GOR-141	low-Ti	Caribbean	46	0.55	11.8	12.7765		11.5			18.4	10.1	0.89	0			74.0404
samp. GOR-149	low-Ti	Caribbean	46.5	0.58	12.1	12.5543		11.3			18	10.3	1.07	0.08			73.955
samp. GOR-148	low-Ti	Caribbean	46.9	0.62	12.4	12.7765		11.5			17.6	10.2	0.95	0.08			73.1769
samp. GOR-146	low-Ti	Caribbean	46.6	0.61	12.4	12.7765		11.5			17.1	10.5	1.06	0.07			72.6074
samp. GOR-157	low-Ti	Caribbean	46.9	0.59	12.8	12.7765		11.5			15.7	10.9	1.1	0.1			70.8762
samp. GOR-167	low-Ti	Caribbean	46.9	0.67	13.9	12.7765		11.5			13.2	12	1.16	0.03			67.1711																	9.92		7.6	2.46	0.94	3.36		3.98		2.37		2.15
samp. GOR-111	low-Ti	Caribbean	51.75	1.29	13.88	0.05555		0.05			6.97	10.91	2.41	0.08			99.5992																	10.83		8.49	2.78		3.88		4.66		2.98		2.98
samp. GOR-112	low-Ti	Caribbean	51.7	1.19	13.64	0.18887		0.17			7.06	11.24	2.78	0.1			98.6672																	9.72		7.71	2.53	0.91	3.54		4.31		2.79		2.75
samp. GOR-113	low-Ti	Caribbean	51.73	1.26	14.01	0.12221		0.11			7.17	11.28	2.42	0.08			99.1467																			7.72	2.5	0.94	3.52		4.28		2.76
samp. GOR-114	low-Ti	Caribbean	51.18	0.97	14.12	0.15554		0.14			7.69	11.61	2.77	0.06			98.989																	7.88		6.23	2.06	0.75	2.91		3.55		2.28		2.25
samp. GOR-115	low-Ti	Caribbean	52.08	1.03	14.3	0.12221		0.11			7.58	10.93	2.78	0.1			99.1925																	7.99		6.31	2.07	0.78	2.89		3.54		2.29		2.24
samp. GOR-137	low-Ti	Caribbean	51.47	1.25	14.02	0.12221		0.11			7.13	10.68	2.64	0.09			99.142																	10.91		8.55	2.78	1.02	3.88		4.72		3.05		2.98
samp. GOR-6A	low-Ti	Caribbean	48.69	1.15	14.09	0.27775		0.25			7.41	11.66	3.07	0.03			98.1425																	4.72		5.6	2.58	1.19	4.37		5.07		2.94		2.63
samp. GOR-118	low-Ti	Caribbean	49.52	1.24	14.19	0.21109		0.19			7.37	11.15	3.13	0.09			98.5744
samp. GOR92-6	low-Ti	Caribbean	46.28	1.02	12.28	12.99		11.6884		0.16	12.81	12.64	1.25	0.043	0.117	4.7	66.1434	35.3	358	1666	608		199	107	15.8	0.6	84	18.4	55	6.1		13	5.15	10.12	1.27	6.6	1.83	0.73	2.4		2.58	0.53	1.56		1.38	0.2
samp. GOR92-7	high-Ti	Caribbean	50.14	2.6	13.41	12.31		11.0765		0.14	8.61	7.82	4.14	0.035	0.26	3.61	58.0824	33.1	378	347	189		306	66	14.8	0.9	449	26.5	166	22.6		38	15	38.53		25.38	6.32	2.01	5.98	0.95				0.31	2.01	0.29
samp. GOR-92-13	high-Ti	Caribbean	49.81	1.91	13.47	11.31		10.1767		0.18	8.8	10.59	3.55	0.197	0.177	1.89	60.6521	41.4	339	413	167		143	80	16.2	3.3	233	23.4	113	14.8		74	10.85	26.59	3.3	15.6	3.81	1.3	4.14		3.64	0.72	1.95		1.68	0.24
samp. GOR-92-12	low-Ti	Caribbean	48.24	1.12	14.29	12.24		11.0136		0.18	7.64	13.48	2.89	0.061	0.071	1.89	55.2885	42.1	427	33	81		23	52	17.5	0.6	94	25.1	48	1.6		15	1.69	4.71	0.6	4.6	2.02	0.96	3.2		3.74	0.79	2.33		2.06	0.31
samp. GOR-92-20	low-Ti	Caribbean	48.51	0.88	13.99	12.61		11.3465		0.21	8.73	11.48	2.99	0.066	0.074	1.41	57.833	43.3	394	269	121		162	84	15.7	0.5	124	24.1	43	1.1		24	1.47	4.18	0.56	4.1	1.72	0.73	2.9		3.52	0.77	2.3		2.08	0.32
samp. GOR-94-32	low-Ti	Caribbean	45.65	0.67	12.4	12.37		11.1305		0.19	16.49	10.77	1.23	0.025	0.052	2	72.5344	33.4	279	1216	670		125	68	12.9	0.7	54	16.6	32	0.4		6	0.6	1.95		3.57	1.38	0.61		0.45				0.26	1.4	0.21
samp. GOR-94-1	low-Ti	Caribbean	47.1	0.7	11.84	12.71		11.4365		0.18	18.04	9.67	0.84	0.044	0.049	2.81	73.7661	24.1	224	827	684		113	58	12.8	2.3	52	16	32	0.5		12	0.586	2		2.58	1.207	0.521	1.92		2.6		1.566		1.383	0.195
samp. GOR-94-19	low-Ti	Caribbean	45.79	0.63	10.74	12.19		10.9686		0.18	20.86	9.1	0.89	0.033	0.047	2.39	77.2215	24.4	204	1830	1079		102	64	12.1	1.3	115	14.6	28	0.5		21	0.472	1.638		2.244	1.061	0.459	1.68		2.3		1.374		1.219	0.177
samp. GOR-94-7	low-Ti	Caribbean	48.36	0.48	12.9	11.43		10.2847		0.17	15.21	10.73	1.06	0.054	0.041	3.22	72.4991	25	217	796	464		98	65	13.5	2	53	15.9	19	0.8		191	0.303	0.992		1.403	0.778	0.365	1.52		2.39		1.579		1.47	0.214
samp. GOR-92-36	low-Ti	Caribbean	45.65	0.38	11.63	9.35		8.41313		0.17	11.27	20.85	0.66	0.005	0.031	3.87	70.4832	33.3	214	630	252		27	58	10.1	0.5	85	14.7	16	0.3		5.8		0.68		1.15	0.66	0.35	1.4	0.3				0.21	1.35	0.22
samp. 6	low-Ti	Caribbean	46.9	0.72	12.7	12.5543		11.3		0.2	15.8	10.9	1.13	0.05			71.3669
samp. 23B	low-Ti	Caribbean	44.7	0.67	12	13.8875		12.5		0.19	18	9.97	0.92	0.03			71.9646
samp. 38	low-Ti	Caribbean	46.3	0.64	13.2	12.5543		11.3		0.21	15.8	10.8	1.43	0.02			71.3669																	1.77		2.6	1.3	0.63	2.35		2.87		1.77		1.61
samp. 47	low-Ti	Caribbean	47.4	0.39	12.4	11.3322		10.2		0.22	17.6	10.7	1.16	0.01			75.4651																	0.88		1.44	0.74	0.41	1.61		2.27		1.48		1.38
samp. 71	low-Ti	Caribbean	46.5	0.67	12.3	12.5543		11.3		0.18	17.1	10.5	1.33	0.02			72.955
samp. 72	low-Ti	Caribbean	46	0.71	12.6	12.6654		11.4		0.21	16.2	10.8	1.19	0.02			71.6966
samp. 73	low-Ti	Caribbean	46.3	0.71	13	12.5543		11.3		0.21	15.5	10.9	1.26	0.03			70.9736
samp. 1P	low-Ti	Caribbean	45.6	0.6	11.2	11.7766		10.6		0.21	20.5	9.89	0.96	0.04			77.5152
samp. 2P	low-Ti	Caribbean	46.3	0.61	11.9	11.7766		10.6		0.18	18.9	10.2	1.16	0.02			76.0673
samp. 3P	low-Ti	Caribbean	45.3	0.6	10.6	12.1099		10.9		0.18	21.9	9.25	1.04	0.02			78.1732
samp. 5P	low-Ti	Caribbean	46	0.59	12	12.221		11		0.16	18.4	10.3	1.11	0.02			74.8856
samp. 4P	low-Ti	Caribbean	46.9	0.73	14.2	12.3321		11.1		0.25	11.3	12.9	1.8	0.03			64.4723
samp. 6A	low-Ti	Caribbean	48.7	1.15	14.1	14.5541		13.1		0.25	7.41	11.7	3.07	0.03			50.207																	4.72		5.6	2.58	1.19	4.37		5.07		2.94		2.63
samp. 14	low-Ti	Caribbean	50.5	1.23	14.1	13.9986		12.6		0.25	7.5	8.19	3.76	0.02			51.4813
samp. 23A	low-Ti	Caribbean	50	1.41	13.8	11.6655		10.5		0.2	9.16	10.9	2.88	0.45			60.8625																	17.05		10.77	3.01	1.14	4.18		4.13		2.31		2.08
samp. 70	high-Ti	Caribbean	52.7	1.83	12.8	14.8874		13.4		0.21	5.25	9.13	2.61	0.14			41.1211																	16.99		12.71	4.12	1.56	5.84		6.76		4.35		4.29
samp. 6	low-Ti	Caribbean	46.93	0.72	12.71	12.4987		11.25		0.2	15.77	10.88	1.13	0.05			71.4186
samp. 38	low-Ti	Caribbean	46.19	0.65	13.04	12.7209		11.45		0.19	15.03	10.96	1.2	0.04			70.0593
samp. 47	low-Ti	Caribbean	47.34	0.41	12.34	11.1767		10.06		0.16	17.05	1.08	1.22	0.02			75.1317
samp. 71	low-Ti	Caribbean	46.46	0.67	12.27	12.5543		11.3		0.18	17.05	10.48	1.33	0.02			72.8972
samp. 72	low-Ti	Caribbean	46	0.71	12.59	12.6654		11.4		0.21	16.16	10.83	1.19	0.02			71.6464
samp. 73	low-Ti	Caribbean	46.33	0.71	12.98	12.5876		11.33		0.21	15.54	10.93	1.26	0.03			70.972
samp. 6A	low-Ti	Caribbean	48.69	1.15	14.09	14.5097		13.06		0.25	7.41	11.66	3.07	0.03			50.2835
samp. 23A	low-Ti	Caribbean	49.95	1.41	13.77	11.6655		10.5		0.2	9.16	10.89	2.88	0.45			60.8625
samp. 70	high-Ti	Caribbean	52.67	1.83	12.78	14.8763		13.39		0.21	5.25	9.13	2.61	0.14			41.1391
samp. G-117	low-Ti	Caribbean	49.32	0.85	13.98	12.7654		11.49		0.23	8.58	12.51	2.89	0.02	0.06		57.1022						166
samp. G-167	low-Ti	Caribbean	46.48	0.77	13.8	12.8209		11.54		0.2	13.26	12.28	1.4	0.03	0.05		67.1945						154
samp. G-160	low-Ti	Caribbean	45.55	0.65	11.89	12.6432		11.38		0.18	18.42	10.19	1.31	0.06	0.05		74.2622						132
samp. G-159	low-Ti	Caribbean	45.22	0.64	11.68	12.5876		11.33		0.18	19.09	10	1.22	0.03	0.04		75.0218						122
samp. 1P	low-Ti	Caribbean	43.9	0.62	11.33	12.7098		11.44		0.18	20.09	9.9	1.08	0.05	0.04		75.7894						118
samp. 3P	low-Ti	Caribbean	44.46	0.63	10.58	12.7765		11.5		0.18	21.45	9.46	1.02	0.02	0.05		76.8781						111
samp. G-142	low-Ti	Caribbean	44.84	0.58	10.46	12.2321		11.01		0.18	22.43	8.96	0.95	0.02	0.04		78.4089						110
samp. G-156	low-Ti	Caribbean	44.91	0.54	9.83	12.2321		11.01		0.18	23.98	8.46	0.86	0.01	0.04		79.5187						101
samp. G-135	low-Ti	Caribbean	45.33	0.34	9.94	11.1878		10.07		0.17	24.03	8.8	0.85	0.03	0.03		80.966						85
samp. GV122	low-Ti	Caribbean	50.6	1.09	14	11.57		10.4107		0.2	7.67	10.99	2.55	0.24	0.08	1.33	56.7718		322	190	103					3	116	24	53	4		51	2.64	8.46		6.86	2.5	0.91	2.71	0.57				0.34	2.36	0.39	1.45	0.23	0.34
samp. GV148	high-Ti	Caribbean	51.7	1.95	12.9	14.7		13.2271		0.24	5.27	6.72	4.88	0.21	0.15	1.56	41.5282		481	64	58					2	30	36	101	9		154	4.56	14.47		12.91	3.92	1.49	5.97	1.01				0.67	4.29	0.66	2.96	0.55	0.72
samp. GV160A	low-Ti	Caribbean	50.1	1.63	13.6	14.7		13.2271		0.2	6.7	9.38	1.98	0.06	0.13	1.94	47.4499		434	143	73					0	70	36	83	7		35	5.11	13.5		11.67	3.75	1.23	5.14	0.98				0.69	3.79	0.6	2.6	0.42	0.56
samp. GV190	low-Ti	Caribbean	57.9	0.96	12.4	11.13		10.0148		0.24	5.18	7.26	2.78	0.06	0.08	1.88	47.9713		349	137	52					1	80	23	44	4		46	2.12	6.4		5.06	1.8	0.53	0	0.47				0.39	2.12	0.36	1.25	0.16	0.28
samp. GV324	low-Ti	Caribbean	50.2	1.14	14.3	12.1		10.8876		0.22	7.73	10.35	2.5	0.15	0.09	1.16	55.8617		338	192	106					1	89	34	55	4		54	2.93	9.97		7.84	2.36	1.25	3.55	0.68				0.58	3.93	0.67	2.07	0.27	0.39
samp. FJ96	low-Ti	Caribbean	49.9	1.29	13.9	13.7		12.3273		0.23	6.29	10.28	2.65	0.14	0.1	2.2	47.6321		409	72	78					2	105	30	63	5		26	3.44	10.24		6.97	2.76	0.99	4.23	0.67				0.58	2.77	0.49	1.83	0.32	0.38
samp. GTJ422	low-Ti	Caribbean	50.5	1.08	14.4	10.24		9.21395		0.17	8.5	12.98	1.65	0.18	0.09	0.17	62.1851		289	437	140					2	102	18	55	5		53	3.71	9.38		7.33	2.2	0.81	2.75	0.52				0.34	1.85	0.31	1.48	0.3	0.4
samp. NC93-2	low-Ti	Caribbean	50.18	1.68	13.58	14.7874		13.31		0.23	6.59	10.57	2.73	0.11	0.13	1.56	46.8816	46	406	70	48					1.1	140	34	107	5.8		20	3.99	11.43	1.93	9.99	3.39	1.2	4.19	0.89	5.35	1.22	3.38	0.52	3.34	0.51	2.98		0.38
samp. NC93-3	low-Ti	Caribbean	50.5	1.04	14.44	11.721		10.55		0.21	8.82	12.66	1.59	0.07	0.07	3.31	59.8438	52	319	288	91					0.54	171	22	58	3.4		10	2.31	6.89	1.13	5.83	1.92	0.72	2.65	0.51	3.27	0.75	2.17	0.33	2.03	0.31	1.57	0.23	0.27
samp. NC93-11	low-Ti	Caribbean	50.05	1	14.27	11.5322		10.38		0.18	8.93	12.11	1.86	0.07	0.07	3.29	60.53	55	323	200	84					0.42	100	15	31	3		11	1.98	5.4	0.91	4.52	1.55	0.59	2.16	0.41	2.65	0.59	1.51	0.25	1.44	0.23	0.94	0.18	0.11
samp. NC93-13	low-Ti	Caribbean	50.47	1.26	14.26	11.9655		10.77		0.19	8.26	12.35	2.33	0.1	0.09	2.11	57.755	49	330	242	87					1.31	146	21	43	4.3		66	3.2	8.5	1.43	7.13	2.33	0.87	3.19	0.6	3.71	0.82	1.92	0.32	1.81	0.31	1.36	0.29	0.18
samp. NC93-18	low-Ti	Caribbean	50.83	1.03	13.99	11.3878		10.25		0.19	8.82	11.66	2.13	0.1	0.07	3.59	60.535	50	324	284	93					0.47	218	16	49	3.3		31	2.16	5.87	0.96	4.95	1.69	0.65	2.26	0.46	2.79	0.62	1.64	0.27	1.6	0.23	1.29	0.2	0.14
samp. NC93-20	low-Ti	Caribbean	50.6	0.98	14.34	10.7211		9.65		0.19	8.73	12.54	1.82	0.06	0.07	3.89	61.7245	50	319	209	106					0.8	178	15	44	3		7	2.15	5.59	0.91	4.76	1.6	0.61	2.15	0.43	2.62	0.56	1.51	0.24	1.55	0.24	1.18	0.18	0.16
samp. NC93-34	low-Ti	Caribbean	51.19	1.01	14.72	10.4878		9.44		0.2	8.55	12.01	2.54	0.38	0.07	2.9	61.7521	53	333	296	100					3.23	139	17	39	3.5		66	2.43	6.44	1.07	5.3	1.77	0.68	2.3	0.46	2.82	0.62	1.56	0.26	1.54	0.26	1.14	0.23	0.2
samp. JC93-1	low-Ti	Caribbean	51.38	1.13	14.63	10.9545		9.86		0.18	8.79	12.19	2.08	0.05	0.08	3.26	61.3771	54	335	311	88					0.41	87	18	50	4.5		12	2.73	7.46	1.21	5.95	1.89	0.71	2.56	0.47	3.11	0.68	1.77	0.3	1.72	0.29	1.29	0.3	0.28
samp. JC93-3	low-Ti	Caribbean	49.57	1.23	14.43	12.8432		11.56		0.22	8.68	10.89	2.77	0.13	0.09	3.64	57.2372	52	343	202	97					0.87	76	21	55	3.4		22	2.73	7.26	1.2	6.24	2	0.75	2.64	0.52	3.34	0.76	2.01	0.34	2.06	0.32	1.52	0.23	0.26
samp. QP93-1	high-Ti	Caribbean	49.44	2.94	13.29	13.0765		11.77		0.19	7.33	7.68	5.38	0.87	0.27	2.83	52.6097	34	383	269	120					11.78	275	36	194	19		159	13.54	34.14	4.92	22.58	6	1.99	6.77	1.21	6.53	1.28	2.96	0.48	2.62	0.41	4.62	1.24	1.38
samp. CM 150	low-Ti	Caribbean	44.12	0.61	13.44		2.87	7.17243	4.59	0.14	8.39	10.91	2.36	1.39	0.33		67.5871
samp. CM 151	high-Ti	Caribbean	47.13	2.19	13.96		4	10.1792	6.58	0.18	8.54	9.6	2.83	0.38	0.24		59.9283
samp. CM 183	low-Ti	Caribbean	38.42	1.5	8.77		5.05	11.434	6.89	0.22	21.58	5.45	0.44	0.04	0.14		77.0872
samp. GOR-109	low-Ti	Caribbean	46.2	0.24	10.3	11.2211		10.1			26.5	6	0.61	0.04			82.3853
samp. GOR-128	low-Ti	Caribbean	46.7	0.17	10	10.9989		9.9			26.3	6.2	0.46	0.02			82.5649																	0.39		0.68	0.47	0.24	1.09		1.78		1.26		1.23
samp. GOR-129	low-Ti	Caribbean	45.4	0.18	10.3	11.3322		10.2			25.1	8.4	0.19				81.4352
samp. GOR-130	low-Ti	Caribbean	46.4	0.11	9.8	10.9989		9.9			25.3	7.6	0.39				81.9998
samp. GOR-131	low-Ti	Caribbean	47.5	0.18	9.2	10.6656		9.6			25.6	7.2	0.48	0.04			82.6194																	0.37		0.66	0.45	0.3	1.11		1.72		1.23		1.19
samp. GOR-132	low-Ti	Caribbean	46	0.18	10.9	11.4433		10.3			22.7	8.5	0.64	0.03			79.7103																	0.32		0.66	0.49	0.24	1.17		2.09		1.55		1.53
samp. GOR-133	low-Ti	Caribbean	46	0.17	9.7	10.7767		9.7			25	7.8	0.49				82.1246																	0.44		0.77	0.53	0.31	1.17		1.83		1.23		1.19
samp. GOR-134	low-Ti	Caribbean	45.8	0.24	9.9	11.3322		10.2			23.8	8.6	0.75				80.6178																	0.4		0.72	0.52	0.27	1.18		1.92		1.34		1.29
samp. GOR-135	low-Ti	Caribbean	46.2	0.17	10.4	10.8878		9.8			23.5	8.5	0.58	0.3			81.0411																	0.53		0.99	0.65	0.32	1.3		2		1.35		1.28	0.2
samp. COL468	low-Ti	Caribbean	48.89	1.51	14.59	11.72		10.5457		0.18	8.88	10.68	2.21	0.44	0.19	3.11	60.0165	33.2	362	463	219				20.6	7.9	335	26	97	8.7		128	6.08	15.54	2.23	11.42	3.07	1.2	3.93		3.95	0.78	1.94		1.84	0.29
samp. COL469	low-Ti	Caribbean	49.85	1.53	14.53	11.55		10.3927		0.18	9.18	9.87	2.34	0.55	0.19	1.87	61.1587	29.6	345	434	209				22.3	10.3	247	24.3	90	8.7		126	5.51	14.77	2.14	10.99	3.01	1.14	3.91		3.93	0.78	1.92		1.82	0.29
samp. COL474	low-Ti	Caribbean	44.62	0.87	6.15	12.27		11.0405		0.17	27.83	7.25	0.05	0.02	0.12	6.2	81.7962	20	157	2115	1523				7.5	3.7	30	9.3	37	6.1		17	3.51	8.39	1.02	5.09	1.35	0.47	1.63		1.6	0.31	0.77		0.75	0.11
samp. COL541	low-Ti	Caribbean	48.77	1.39	12.52	12.95		11.6524		0.18	10.31	10.82	2	0.3	0.11	3.1	61.1985	37.6	366	671	265				17.1	6.1	225	22.5	72	5.1		77	3.29	9.71	1.48	8.41	2.29	0.91	3.22		3.23	0.64	1.42		1.46	0.24			2.09
samp. COL547	low-Ti	Caribbean	46.73	1.22	12	13.56		12.2013		0.21	9.53	12.38	2.14	0.46	0.16	2.91	58.1995	32.7	334	451	168				16.9	12.6	282	20.7	60	13.3		332	7.52	15.19	1.79	9.08	2.25	0.89	2.94		3.2	0.62	1.56		1.49	0.23			0.55
samp. COL301	high-Ti	Caribbean	49.74	2.06	17.95	8.02		7.2164		0.14	9.88	7.55	2.22	1.16	0.33	3.61	70.9348	22.5	153	352	149				14.7	16.6	478	21	111	12.4		738	19.8	44.21	5.26	21.3	3.89	1.34	3.87		3.76	0.75	1.84		1.91	0.31
samp. COL311	low-Ti	Caribbean	51.05	0.74	14.69	9.63		8.66507		0.16	9.29	12.17	1.85	0.09	0.06	0.94	65.6492	39.2	240	485	136				15.3	2	131	16.6	35	2.3		31	2.06	5.46	0.69	4.84	1.27	0.54	1.96		2.42	0.5	1.42		1.48	0.24
samp. COL530	low-Ti	Caribbean	47.65	0.81	12.96	10.37		9.33093		0.16	13.89	13.32	0.58	0.17	0.06	4.64	72.6294	43.5	251	877	306				13.4	4.1	57	17.1	43	3.2		88	2.85	7.79	1.04	5.65	1.58	0.62	2.28		2.56	0.55	1.5		1.62	0.27
samp. COL536	low-Ti	Caribbean	47.3	0.8	10.77	11.3		10.1677		0.17	16.89	9.67	0.83	0.05	0.08	5.45	74.7546	31.3	228	1462	641				12.4	1.8	56	16	44	4.7		46	3.31	8.16	1.01	5.59	1.49	0.57	2.04		2.19	0.44	1.17		1.24	0.22
samp. COL537	high-Ti	Caribbean	53.34	2.82	11.36	11		9.8978		0.14	7.26	8.9	4.07	0.12	0.21	2.37	56.6634	28.8	367	514	165				22.1	1.9	877	26.9	148	16.9		53	11.31	30.8	4.11	20.59	5.1	1.83	5.67		5.05	0.91	2.03		1.71	0.25
samp. 15-146-41-2-88	low-Ti	Caribbean	50.3	0.8	15.7	11.2211		10.1		0	8.24	11.8	2.6	0			59.2553
samp. 15-146-42-1-30	low-Ti	Caribbean	50.6	0.98	15.8	10.4656		9.42		0.2	8.78	12.8	2.37	0.09			62.4268
samp. 15-146-43-1-84	low-Ti	Caribbean	50.4	0.98	15	11.3322		10.2		0	9.13	12.1	2.28	0.08			61.4731
samp. 15-146-43-4-140	low-Ti	Caribbean	50.3	0.93	15	11.11		10		0	8.51	12.8	2.28	0			60.2698
samp. 150-11-1-96	low-Ti	Caribbean	50.5	1.05	15.8	10.8878		9.8		0	8.54	12	2.48	0.09			60.8364
samp. 150-11-2-75	low-Ti	Caribbean	50.5	1.05	15.6	10.91		9.82		0	8.86	11.7	2.46	0.11			61.6611
samp. 151-15-1-138	high-Ti	Caribbean	50.4	2.78	16	12.4432		11.2		0.19	6.35	9.08	3.02	1.01			50.2651									18	215	23.9	145	20.3	0.5	83.5	13.2	32.5	4.18	17.3	3.8	1.37	3.9	0.69	3.93	0.84	2.16		1.77		3.82		1.36
samp. 152-23-1-54	low-Ti	Caribbean	51.2	1.66	16.7	11.6655		10.5		0	7.09	7.25	3.33	1.06			54.6211
samp. 152-23-1-132	low-Ti	Caribbean	50.6	1.57	16	11.7766		10.6		0	7.66	8.65	3.78	0.66			56.2969
samp. 152-24-1-80	low-Ti	Caribbean	49.7	1.49	15.6	14.2208		12.8		0	7.05	8.88	2.99	1			49.5412									17	50	19.9	45	1.2	0.31	5.2	1.56	5	0.98	5	2.18	0.85	3.5	0.68	4.4	1.04	3.1		3.1		1.69		0.09
samp. 153-20-2-15	low-Ti	Caribbean	50	1.55	16	13.1098		11.8		0.19	7.68	10	2.99	0.08			53.7078
samp. 153-20-2-116	low-Ti	Caribbean	50.1	1.48	15.4	13.332		12		0.25	8.04	10.5	2.79	0.09			54.428
samp. 151-13(CC)	high-Ti	Caribbean	48.1	2.53	13.96	14.7995	9.6	13.3181	4.68	0.14	5.81	7.69	2.37	1.62	0.26		43.746
samp. 151-15-1(109-125)	high-Ti	Caribbean	46.5	2.51	13.8	14.0528	8.32	12.6463	5.16	0.14	5.91	9.71	2.22	1.9	0.25		45.4462															40.2	14.6	35.4		22.4	5.65	1.89	6.1		5.55		2.79		2.32	0.295			2.19
samp. 152-23-1(107-121)	low-Ti	Caribbean	48.8	1.57	14.86	14.574	9.73	13.1151	4.36	0.08	6.76	8.22	2.55	1.03	0.16		47.8844
samp. 152-24-2(55-67)	low-Ti	Caribbean	47.8	1.59	14.9	12.5706	7.46	11.3125	4.6	0.15	6.98	9.3	2.78	0.7	0.14		52.3783															6.9	1.75	7.31		8.16	3.35	1.25	5.18		6.58		4.12		3.96	0.52			1.66
samp. 153-19-1(116-120)	low-Ti	Caribbean	47.8	1.68	17.21	12.3272	6.55	11.0937	5.2	0.23	7.1	9.38	2.82	0.1	0.13		53.2898
samp. 153-20-2(71-79)	low-Ti	Caribbean	48.6	1.48	14.69	13.2225	5.09	11.9	7.32	0.17	7	11.89	2.27	0.04	0.11		51.1857															12.5	3.36	9.86		8.45	2.94	1.11	4.23		5.1		3.2		3.15	0.422			0.61
samp. 99PE19	low-Ti	Caribbean	52.9	1.34	14.1	14.2208		12.8		0.25	7.4	8.89	1.33	0.87	0.11	5.91	50.7524	80	434	71	77	43.4	120	100		9.55	648	24.8	58	3.39		468.49	2.99	7.97	1.28	6.43	2.22	0.86	3.17	0.59	3.85	0.86	2.56		2.49	0.38	1.6	0.24	0.23
samp. 99PE20	low-Ti	Caribbean	52.3	1.3	13.9	14.5541		13.1		0.24	7.6	9.29	1.7	0.52	0.11	4.15	50.8399	86	420	76	76	42.1	108	101		4.74	247	25.2	58.3	3.52		93.45	3.03	8.32	1.29	6.48	2.16	0.84	3.12	0.61	3.92	0.9	2.57		2.51	0.41	1.69	0.24	0.23
samp. 99PE21	low-Ti	Caribbean	52.6	1.07	14.8	14.2208		12.8		0.31	7.48	8.12	2.22	0.55	0.07	3.69	51.0211	101	394	223	107	45.4	76	85		4.7	249	23.3	46.8	3.14		33.47	2.37	6.46	1.03	5.26	1.81	0.77	2.64	0.52	3.45	0.81	2.31		2.17	0.35	1.33	0.2	0.2
samp. 99PE22	low-Ti	Caribbean	51.8	0.99	14.6	11.9988		10.8		0.21	8.73	10.49	2.15	0.22	0.08	2.07	59.0319	63	335	169	103	43	94	82		1.02	162	20.6	46.4	3.08		7.75	2.55	6.73	1.06	5.36	1.82	0.69	2.57	0.48	3.21	0.73	2.1		2	0.33	1.36	0.23	0.19
samp. 97PE5	low-Ti	Caribbean	50.3	0.99	14.4	12.3321		11.1		0.22	8.42	11.24	3.03	0.22	0.07	3.14	57.4865					47				2.57	166	21.4	51.1	3.26			2.67	7.24	1.15	5.9	1.94	0.76	2.66	0.49	3.33	0.74	2.13		2.02	0.32	1.45	0.22	0.23
samp. 97PE6	low-Ti	Caribbean	51.4	1.03	14.9	10.8878		9.8		0.18	7.64	12.91	1.9	0.2	0.05	2.13	58.1535					42.3				0.82	87	20.4	52.1	3.3		25.9	2.71	7.37	1.17	5.9	1.95	0.76	2.64	0.48	3.26	0.71	2.04		1.95	0.31	1.5	0.23	0.24
samp. 97PE13	low-Ti	Caribbean	51.5	1.16	13.3	13.2209		11.9		0.28	7.79	11.23	2.29	0.55	0.14	2.79	53.8515					46.6				9.59	577	23.8	55.8	3.75		133	2.89	7.92	1.25	6.4	2.14	0.83	2.93	0.54	3.66	0.82	2.36		2.25	0.36	1.58	0.24	0.21
samp. 97G5	low-Ti	Caribbean	43.7	0.78	10.2	14.9985		13.5		0.21	19.85	10.87	0.39	0.05	0.09	5.49	72.3838	29	245	1246	837	100	3	84		0.77	14.6	15	29.5	1.63		19.9	1.12	3.59	0.68	3.9	1.53	0.57	2.06	0.37	2.36	0.5	1.39		1.2	0.18	0.88	0.07	0.05
samp. 97G6	low-Ti	Caribbean	44.6	0.56	7.1	12.8876		11.6		0.18	27.26	7.89	0.05	0.03	0.05	7.1	80.7287	25	193	1952	1346	90.68		72		1.42	31.01	8.76	24.76	0.6		15.69	0.65	2.13	0.42	2.53	1.01	0.38	1.36	0.25	1.59	0.31	0.8		0.75	0.11	0.72	0.04	0.04
samp. 98G5	low-Ti	Caribbean	44.9	0.54	7	12.3321		11.1		0.18	27.29	8.33	0.02	0.01	0.04	7.06	81.4216	61	179	1298	1178	88.2	11	63		1.44	25.1	8.2	22.6	0.56		5.14	0.58	2	0.38	2.28	0.92	0.36	1.25	0.23	1.44	0.3	0.8		0.72	0.11	0.65	0.04	0.03
samp. 98G6	low-Ti	Caribbean	42.9	0.83	10.8	13.4431		12.1		0.2	22.21	10.05	0.24	0.01	0.06	5.96	76.5917	75	278	2630	867	72.9	62	76		0.6	11.6	12.2	33.4	0.8		5.68	0.87	2.99	0.57	3.44	1.36	0.57	1.87	0.34	2.15	0.46	1.2		1.06	0.16	0.96	0.06	0.04
samp. 98G7	low-Ti	Caribbean	47.1	0.56	7.6	11.4433		10.3		0.17	23.04	10.38	0.21	0.02	0.05	5.32	79.9497	65	196	1554	995	79	48	62		0.53	12	8.9	24.6	0.62		8.2	0.61	2.13	0.41	2.49	0.99	0.39	1.39	0.25	1.58	0.33	0.88		0.78	0.12	0.71	0.04	0.03
samp. 98G8	low-Ti	Caribbean	44.6	0.78	10.3	12.8876		11.6		0.2	21.53	10.09	0.36	0.01	0.06	6.37	76.7903	81	282	1910	841	74.4	18	71		0.48	11.4	12.2	32.5	0.84		5.63	0.83	2.93	0.57	3.42	1.38	0.5	1.89	0.34	2.18	0.46	1.21		1.07	0.16	0.94	0.05	0.04
samp. 98P3	low-Ti	Caribbean	53.4	1.3	14.1	13.332		12		0.19	8.18	5.93	4.54	0.17	0.1	2.76	54.8559	85	437	134	98	44.5	90	102		2.35	128	24.5	60.6	4.34		47.51	3.37	8.58	1.36	7.04	2.36	0.9	3.17	0.61	4.17	0.91	2.43		2.54	0.39	1.72	0.23	0.24
samp. 98P7	low-Ti	Caribbean	48.9	0.98	14.6	13.332		12		0.2	9	11.22	2.95	0.04	0.08	2.56	57.2089	74	334	243	109	49.4	63	90		0.75	78.5	20.3	49.3	3.44		21.72	2.57	6.64	1.05	5.42	1.87	0.68	2.5	0.48	3.29	0.72	1.97		2.08	0.33	1.31	0.18	0.18
samp. 98P8	low-Ti	Caribbean	50.8	0.92	14.1	12.221		11		0.19	8.95	10.25	3.54	0.08	0.08	3.1	59.1899	73	334	247	108	43.8	64	81		0.71	86.9	18.1	45.1	3.61		27.23	2.29	5.9	0.94	4.86	1.63	0.62	2.25	0.43	2.95	0.67	1.79		1.88	0.3	1.27	0.24	0.17
samp. 98P10	low-Ti	Caribbean	53	1.27	13.3	12.9987		11.7		0.21	6.78	9.49	4.09	0.04	0.11	2.61	50.8112	58	418	132	87	41.2	110	102		0.18	101	23.8	59.3	3.51		16.33	2.85	7.56	1.23	6.46	2.19	0.74	3.07	0.59	4.1	0.9	2.51		2.66	0.41	1.71	0.23	0.2
samp. 99PE15	low-Ti	Caribbean	52	1.28	14.2	14.3319		12.9		0.2	7.19	7.87	0.84	3.43	0.11	5.76	49.8382	75	430	111	75	41.9	106	98		20.94	205	23.5	56.1	3.58		77.79	2.89	7.74	1.24	6.25	2.09	0.82	2.9	0.56	3.7	0.83	2.44		2.37	0.37	1.57	0.24	0.22
samp. 99PE16	low-Ti	Caribbean	52.1	0.98	14.4	11.9988		10.8		0.18	8.37	11.39	1.1	0.44	0.08	6.05	58.0097	80	357	241	103	40.9	91	80		7.44	192	18.8	43.7	2.87		30.97	2.36	6.27	0.98	5.05	1.7	0.66	2.36	0.45	3	0.67	1.91		1.88	0.3	1.23	0.2	0.19
samp. 97G11	low-Ti	Caribbean	50.23	0.87	14.69	12.4654		11.22		0.16	8.31	12.89	1.55	0	0.08	1.04	56.9013									0.44	85.52	20.46	47.64	3.34		14.07	2.55	6.77	1.08	5.41	1.86	0.72	2.4	0.48	3.14	0.72	2.08	2.67	2.02	0.31	1.28	0.21	0.22
samp. 97G12	low-Ti	Caribbean	50.23	0.8	14.44	12.2432		11.02		0.17	8.6	13.11	1.55	0	0.08	1.56	58.1787									1.07	78.62	18.49	42.43	2.96		19.81	2.35	6.18	0.97	5	1.68	0.66	2.24	0.43	2.85	0.65	1.94	2.67	1.86	0.28	1.21	0.19	0.23
samp. 98SL01	low-Ti	Caribbean	50.22	1.03	14.42	13.4764		12.13		0.16	7.69	12.43	1.83	0	0.09	1.86	53.0538		357	218	115	47.5				0.72	97.06	24	58.42	4		17.79	2.92	7.74	1.23	6.26	2.1	0.8	2.86	0.54	3.52	0.74	2.28	2.46	2.14	0.34	1.47	0.23	0.23
samp. 97MA7	low-Ti	Caribbean	49.9	1.25	15.12	12.0099		10.81		0.16	7.87	12.64	2.09	0	0.15	4.44	56.4796		346	243	106	54.5				1.08	98.15	25.4	67.9	4.22		12.7	3.26	8.91	1.45	7.42	2.56	0.92	3.3	0.62	4.04	0.9	2.55	2.53	2.4	0.36	1.85	0.27	0.27
samp. 97MA13	low-Ti	Caribbean	50.1	1.17	14.5	12.8765		11.59		0.18	8.84	9.91	2.9	0.62	0.18	5.67	57.6204		315	225	106	48.3				7.57	72.8	21.59	41.15	3.74		4779	3.01	7.93	1.25	6.48	2.22	0.88	4.63	0.54	3.47	0.76	2.16	2.46	1.99	0.3	1.28	0.24	0.21
samp. 97MA16	low-Ti	Caribbean	50.62	1.39	16.6	11.6544		10.49		0.19	6.64	11.77	2.11	0	0.19	4.07	53.0152		323	49	60	46.6				0.54	113.4	29.03	79.24	4.59		15	3.75	10.3	1.68	8.72	2.92	1.09	3.93	0.7	4.63	1.01	2.87	2.21	2.69	0.4	2.09	0.29	0.29
samp. 97MA27	low-Ti	Caribbean	50.34	1.33	15.92	10.4101		9.37		0.15	5.37	14.07	1.94	1.35	0.15	7.17	50.5344		329	204	127	60.8				11.42	106	26.53	70.99	4.39		81.7	3.82	9.84	1.58	8.08	2.66	1.02	3.53	0.65	4.11	0.92	2.67	2.72	2.42	0.36	1.88	0.27	0.29
samp. 99GY1	low-Ti	Caribbean	51.21	1.24	15.62	10.0434		9.04		0.17	8.28	11.66	2.51	0.14	0.13	2.1	62.0165		302	334	92	45.7				1.37	104.1	34.86	86.99	2.23		9.5	2.74	8.72	1.54	8.41	3.07	1.11	4.2	0.78	5.05	1.12	3.24	2.1	2.98	0.45	2.09	0.13	0.12
samp. M5-205	high-Ti	Caribbean	48.46	1.78	12.52	14.79		13.308		0.27	5.49	12.41	4.08	0.14	0.18	7.01	42.3755	44.6	412	31	47					0.73	39	41.8	104	7.49		19	6.56	16.89	2.55	12.19	3.84	1.38	5.24	1	6.62	1.46	4.24	0.67	4.28	0.63			0.45
samp. M5-211	low-Ti	Caribbean	50.67	1.04	14.03	12.43		11.1845		0.18	7.47	10.15	3.99	0.32	0.09	1.75	54.3497	49.7	338	198	91					3.33	142	23	62	3.99		113	3.25	8.21	1.25	6.62	2.22	0.87	2.86	0.54	3.91	0.84	2.54	0.37	2.36	0.36			0.23
samp. M3-312	low-Ti	Caribbean	51.2	1.43	14.2	12.66		11.3915		0.19	7.02	8.91	3.96	0.06	0.13	4.13	52.3473	49.3	368	100	72					0.67	49	25.8	77	4.78		50	3.8	10.1	1.57	7.72	2.46	1	3.38	0.65	4.26	0.89	2.69	0.39	2.58	0.39			0.28
samp. M3-313	low-Ti	Caribbean	50.65	1.44	15.11	12.25		11.0226		0.21	7.53	8.64	3.37	0.1	0.11	3.4	54.9095	52	406	120	99					0.97	126	26.6	80	5.04		85	3.9	10.62	1.64	8.15	2.61	1.08	3.51	0.68	4.46	0.96	2.78	0.42	2.64	0.37			0.29
samp. PND905	low-Ti	Caribbean	51.04	0.91	14.4	11.47		10.3207		0.19	8.03	10.98	2.17	0.19	0.08	3.26	58.1053	48.1	311	197	104					2.38	131	21.7	55	3.27		46	2.83	7.38	1.15	5.5	1.83	0.76	2.62	0.52	3.44	0.77	2.22	0.36	2.29	0.34			0.21
samp. PND1441	low-Ti	Caribbean	50.79	1.54	14.23	13.74		12.3633		0.21	7.22	9.67	2.64	0.23	0.13	1.81	51.0046	49.1	368	55	63					7.23	124	28.5	90	5.21		31	4.47	12.37	1.95	9.42	3.12	1.12	4.11	0.73	4.81	0.99	2.82	0.42	2.74	0.4			0.19
samp. PND1482	high-Ti	Caribbean	48.95	1.94	14.02	15.26		13.7309		0.21	5.78	10.27	1.82	0.22	0.18	1.63	42.8693	49	481	116	75					5.25	114	43.6	123	8.17		27	6.68	17.47	2.71	12.74	4.05	1.42	5.39	1.04	6.88	1.46	4.37	0.68	4.35	0.66			0.49
samp. PND1508	low-Ti	Caribbean	49.38	0.98	13.34	11.32		10.1857		0.18	10.22	12.87	1.59	0.07	0.08	0.54	64.1394	53.1	284	490	142					1.14	123	20.4	57	3		23	2.78	7.76	1.25	6.25	2.06	0.81	2.81	0.52	3.5	0.71	2.07	0.32	2.02	0.28			0.15
samp. C1A	low-Ti	Caribbean	50.58	1.53	13.26	14.69		13.2181		0.21	6.96	8.98	3.71	0.13	0.11	2.09	48.417	40.1	326	215	75					1.75	90	24.5	62	3.99		44	3.28	8.74	1.41	7.23	2.4	0.92	3.27	0.6	4.49	0.99	3.12	0.48	3.13	0.48			0.27
samp. C1B	low-Ti	Caribbean	50.91	1.5	13.32	14.18		12.7592		0.22	6.92	8.63	3.51	0.18	0.11	2.39	49.1558	46.3	371	278	85					2.62	129	29.3	70	5.91		99	4.08	10.46	1.7	8.83	2.86	1.1	3.85	0.74	5.31	1.15	3.36	0.51	3.27	0.55			0.35
samp. C2B	low-Ti	Caribbean	51.14	1.21	13.76	12.73		11.4545		0.2	7.55	10.42	3.07	0.18	0.07	1.73	54.0221	48.2	326	154	78					1.99	84	20	40	3.52		28	2.48	6.52	1.15	5.61	1.9	0.77	2.57	0.47	3.47	0.78	2.46	0.38	2.39	0.39			0.2
samp. EQ93.02	low-Ti	Caribbean	52.01	1.06	14.89	12.17		10.9506		0.16	7.58	7.7	4.3	0	0.13	2.99	55.2354		327	236	98.1					0.3	66	19.6	44	3.13	0.01	29	2.68	7.02	1.07	5.63	1.85	0.71	2.73	0.49	3.4	0.74	2.06	0.309	2.05	0.319	1.33	0.242	0.26
samp. EQ1	low-Ti	Caribbean	48.88	1.23	14.39	12.75		11.4725		0.2	8.96	10.81	1.89	0.72	0.18	4.45	58.1975	61.49	353.12	284.84	100.73					5.24	110.69	22.26	60.09	4.16	0	14.9	3.5	9.63	1.56	8.11	2.57	0.96	3.46	0.66	4.4	0.9	2.6	0.39	2.53	0.38	1.89	0.58	0.25
samp. CA1	low-Ti	Caribbean	50.87	1.55	13.2	14.73		13.2541		0.19	6.69	8.3	3.91	0.18	0.18	2.72	47.3618	81.49	509.92		82.95					6.01	160.82	38.38	86.39	5.34	0.11	392.35	5.29	14.17	2.25	11.89	3.91	1.37	5.6	1.05	7.09	1.57	4.59	0.66	4.62	0.72	2.76	0.4	0.53
samp. CA2	low-Ti	Caribbean	51.56	1.08	13.75	12.87		11.5804		0.18	7.36	9.86	3.68	0.15	0.14	2.15	53.1161	75.97	413.46		84.76					4.02	121.42	25.92	40.81	3.87	0.05		3.68	9.66	1.52	8.15	2.67	1.03	3.89	0.71	4.81	1.04	3.05	0.43	2.99	0.47	1.54	0.28	0.35
samp. EQ11	low-Ti	Caribbean	50.4	1.36	13.93	14.1		12.6872		0.22	7.24	9.02	3.1	0.27	0.18	5.94	50.4273	79.86	459.77		67.76					4.66	201.58	33.58	73.32	4.66	0.03		4.3	11.35	1.8	9.5	3.12	1.17	4.68	0.85	5.89	1.3	3.82	0.58	3.9	0.61	2.24	0.33	0.43
samp. EQ13	low-Ti	Caribbean	48.95	1.16	14.86	12.05		10.8426		0.2	8.38	11.54	2.5	0.16	0.16	5.64	57.9429	78.72	398.13		121.05					6.44	208.21	22.69	62.67	3.92	0.13		3.2	8.9	1.43	7.66	2.51	0.96	3.65	0.67	4.56	0.99	2.85	0.42	2.78	0.41	2.07	0.3	0.29
samp. EQ2	low-Ti	Caribbean	52.29	0.91	16.22	11.9		10.7076		0.17	5.1	8.8	2.88	1.38	0.34	2.16	45.9178	33.22	421.12	49.59	25.41					24.35	441.55	20.45	87.97	1.22	0.46	263.95	10.57	24.7	3.92	17.96	4.17	1.24	4.02	0.65	3.99	0.8	2.28	0.33	2.18	0.35	2.53	0.03	1.16
samp. EQ7	low-Ti	Caribbean	52.2	0.95	16.32	12.18		10.9596		0.19	4.48	9.4	2.92	0.99	0.39	3.75	42.1523	38.95	418.98	36.54	20.16					17.54	545.6	23.5	105.94	1.42	0.56	266.7	13.13	30.88	4.83	22.42	5.08	1.44	4.82	0.75	4.59	0.9	2.6	0.37	2.41	0.37	3.07		1.44
samp. GOR1	low-Ti	Caribbean	51.22	1.306	13.8	13.19		11.8684		0.17	7.18	10.42	2.42	0.07	0.114		51.8863	49.9	419	82	67		192	99	16.3	1.1	93	27.9	73	5.4		17	3.3	11.18		8.94	3.07	1.14	4.1	0.76				0.49	2.99	0.49			0.6
samp. GOR6	low-Ti	Caribbean	46.28	1.018	12.28	12.99		11.6884		0.16	12.81	12.64	1.25	0.04	0.117		66.1434	35.3	358	1666	608		199	107	15.8	0.6	84	18.4	55	6.1		13	5.15	10.12		6.6	1.83	0.73	2.4		2.58	0.53	1.56		1.38	0.2			1.1
samp. GOR29	low-Ti	Caribbean	43.91	0.483	8.86	11.61		10.4467		0.17	26.1	7.91	0.84	0.01	0.042		81.6635	25.4	198	2399	1503		90	62	9.6	0.5	38	11.8	23	0.2		4	0.4	1.55		2.1	1.02	0.46		0.31				0.18	0.98	0.14
samp. 8251	low-Ti	Caribbean	47.4	0.76	13.2	9.77		8.79105		0.21	10.9	13.1	1.07	0.44	0.1		68.8495	51	260	500	156	50	73	56		5	73	16	33	3		80	1.71	4.17			1.52	0.56		0.44					1.46	0.24	0.94		0.1
samp. 8271	low-Ti	Caribbean	47.2	0.72	14.5	9.59		8.62908		0.16	10	14.8	1.24	0.05	0.07		67.3819	50	238	353	164	50	191	49		3	93	13	24	3		20	1.26	2.86			1.13	0.47		0.31					1.08	0.19	0.6		0.09
samp. 8253	low-Ti	Caribbean	54.3	1.08	14.8	11.5		10.3477		0.17	3.63	8.06	3.14	1.13	0.41		38.4742	31	396	20	20	29	276	111		20	423	29	110	3		260	12.8	29.8			5.57	1.36		0.89					2.86	0.45	3.43		1.45
samp. 96VD33	low-Ti	Caribbean	51	1.29	14.9	11.3		10.1677		0.16	5.13	9.45	4	0.04	0.1	2.98	47.3512			15	38					0.21	37.07	25.29	57.33	0.88			2.17	7.19	1.29	7.2	2.64	0.79	3.27	0.65	4.31	1.01	2.87	0.43	2.86	0.45	1.96	0.076	0.05
samp. 96VD35	low-Ti	Caribbean	51.6	1.15	15.25	11.15		10.0328		0.18	5.8	7.7	4.54	0.24	0.06	2.44	50.7516			57	37					2.16	194.38	29.05	65.11	1.69			2.22	7.05	1.22	6.36	2.49	0.84	2.83	0.68	4.21	0.93	2.77	0.51	2.82	0.42	1.86	0.17	0.11
samp. 96VD39	low-Ti	Caribbean	50.8	1.52	14.9	11.92		10.7256		0.18	5.45	8.6	3.82	0.4	0.1	2.14	47.5281			60	31					4.6	259.21	26	39.21	1.42			2.15	6.82	1.22	6.17	2.42	0.94	2.76	0.65	3.94	0.86	2.46	0.46	2.51	0.37	1.32	0.14	0.07
samp. 97VD14	low-Ti	Caribbean	52.9	1.3	15.55	10.8		9.71784		0.16	4.52	7.45	5.4	0.06	0.1	1.84	45.329			34	30					0.45	97	26	37	0.94			2.14	6.29	1.15	6.2	2.23	0.84	2.85	0.54	3.62	0.81	2.44	0.36	2.43	0.38	1.51	0.09	0.05
samp. 97VD07	low-Ti	Caribbean	50	1.23	12.38	13.32		11.9853		0.19	5.23	13.5	1.45	0.03	0.11	2.99	43.7526			45	72					0.26	39.38	25.51	60.91	4.25			3.6	9.46	1.49	7.64	2.62	0.96	3.18	0.63	4.21	0.99	2.87	0.44	2.85	0.45	1.86	0.287	0.29
samp. 97VD08A	low-Ti	Caribbean	50.5	1.18	13.3	12.8		11.5174		0.19	5.2	10.85	1.77	0.03	0.1	3.61	44.5927			30	57					0.3	33	12	40	2.4			1.53	3.86	0.6	2.89	1.04	0.49	1.35	0.28	2.02	0.47	1.41	0.23	1.6	0.26	1.2	0.2	0.1
samp. 97VD08C	low-Ti	Caribbean	50.2	1.24	13.35	13.68		12.3093		0.2	5.75	10.2	1.55	0.03	0.1	3.97	45.4355			32	63					0.21	33	15	50	3.23			1.86	4.67	0.74	3.58	1.28	0.56	1.66	0.35	2.47	0.57	1.72	0.29	1.94	0.32	1.46	0.23	0.16
samp. 97VD09	low-Ti	Caribbean	49	0.83	14.4	10.15		9.13297		0.17	9.18	11.7	1.71	0.38	0.08	2.43	64.1803			465	186					7.95	82.5	15.87	46.91	3.41			1.97	6.22	0.96	4.96	1.55	0.58	2.45	0.44	2.89	0.62	1.82	0.26	1.8	0.27	0.84	0	0.23
samp. 97VD15	low-Ti	Caribbean	51.25	1.33	13	14.05		12.6422		0.19	5.7	9.46	2.63	0.13	0.11	1.72	44.5589			60	82					1.73	57.4	21.6	64.3	4.47			3.73	10.02	1.59	8.03	2.67	1	3.36	0.67	4.5	1.04	3.01	0.46	3	0.48	2.46	0.31	0.31
samp. 85-H-11	low-Ti	Caribbean	52.68	1.28	13.85	11.1656		10.05			7.02	12.15	2.06	0.04	0.05		55.4595	53.7		200	51	45		150		2	58	22	60	6		70	4.7	13		8	2.6	0							2.7	0.52	2.5	1.6	0
samp. 85-H-78	low-Ti	Caribbean	51.53	0.78	15.13	8.48804		7.64			8.43	14.19	1.58	0.03	0.06		66.2949
samp. 85-H-4L	low-Ti	Caribbean	46.99	1.41	12.97	12.1		10.8876		0.19	9.65	13.12	3.26	0.24	0.33		61.2397	47.8		325	194	60	22	91		0	538	16	72	12		273	5.5	17		5	2.4	0.8		0.5					2	0.33	1.6	1	0.5
samp. 85-H-92	low-Ti	Caribbean	50.05	1.65	14.46	13.2		11.8774		0.2	6.98	8.88	4.7	0.08	0.18		51.1617			156	129		124	119		0	665	20	94	5		594	0	14
samp. 85-H-93	high-Ti	Caribbean	48.81	2.84	11.17	13.64		12.2733		0.19	9.38	11.62	1.64	0.45	0.24		57.6695	40.2		470	226	61	74	101		10	261	18	149	18		109	17.3	44		26	5.9	2.2		0.6					2	0.27	3.8	1	1.4
samp. 85-H-94	high-Ti	Caribbean	53.18	2.94	12.3	10.4767		9.43			5.48	9.68	3.3	0.33	0.15		50.8817
samp. 85-LVJ-7	high-Ti	Caribbean	50.01	3.02	12.65	12.4987		11.25		0.22	9.24	6.25	3.63	0.17			59.4171	36.1		570	120	50		80		2	730	26	200	24		470	18.1	40		24	3	0		0					2.3	0.37	5.4	2.9
samp. 85-LVJ-2	low-Ti	Caribbean	47.46	1.49	14	12.8209		11.54		0.91	9.07	8.35	2.86	0.31			58.3514	45.8		300	87	51		140		10	210	20	81	9		160	4.4	13		9	3	0		0					2	0.34	2.6	0	0
samp. M-7-Y	high-Ti	Caribbean	49.95	3.05	11.84	10.9878		9.89			9.34	10.06	3.29	0.13	0.14		62.7345
samp. 85-H-53A	low-Ti	Caribbean	52.08	1.27	14.21	11.58		10.4197		0.18	7.33	8.59	4	0.72	0.1		55.6345	56		149	114	44	217	89		13	138	23	67	0		76	4.2	12		5	2.2	0.9		0.7					2.5	0.43	1.8	0	0
samp. 85-H-55A	low-Ti	Caribbean	50.61	1.22	14.4	11.93		10.7346		0.18	7.82	10.46	3.18	0.41	0.09		56.495			281	132		160	72		10	137	20	59	5		554	0	25
samp. 88-2	low-Ti	Caribbean	51.45	1.16	14.06	10.58		9.51988		0.18	9.7	8.38	2.52	2.09	0.09		64.4925
samp. 85-J-702	high-Ti	Caribbean	48.23	3.91	13.63	12.3321		11.1			7.11	7.57	3.4	0.2	0.19		53.3107					47		90		2	200	28	250	44		400	38.9	79		44	8.9	2.8							2.4	0.38	7.1	4.3
samp. 85-J-704	low-Ti	Caribbean	53.46	1.43	17.04	12.5321		11.28			5.84	2.29	4.62	0.61	0.15		47.9951
samp. 85-H-17	high-Ti	Caribbean	50.62	3.47	13.23	12.7876		11.51			6.51	9.29	4.09	0.28	0.25		50.2047
samp. 85-H-42	low-Ti	Caribbean	49	1.4	15	12.7		11.4275			8	11.2	2.4	0.39		3.1	55.5146
samp. 85-J-611	low-Ti	Caribbean	51.28	1.47	14.14	15.1763		13.66			6.05	11.93	1.99	0.02	0.14		44.1186					45		220		0	44	20	60	6		60	4.1	9		9	2.5	0.9							2.8	0.47	2.5	0	4
samp. 85-J-621	high-Ti	Caribbean	43.11	2.37	14.78	16.2539		14.63			6.27	16.99	0.96	0.14	0.23		43.3095
samp. 87-78A	high-Ti	Caribbean	41.92	3.7	16.09	17.25		15.5216		0.23	10.11	7.56	2.74	0.04	0.4		53.727			76	197	57	248	68		0	1164	27	228	37		73	32.5	71		40	7.9	3.2		1.1					2.5	0.36	4.5	3	2.5
samp. 85-J-681B	high-Ti	Caribbean	52.06	1.8	16.18	12.9765		11.68			5.18	5.35	5.74	0.08	0.16		44.1517
samp. 87-75	low-Ti	Caribbean	53.03	0.92	17.2	9.34				0.16	5.64	9.22	4.31	0.19	0.07		100			79	66		103	65		5	273	21	59	0		39	0	12
samp. M-4-H	high-Ti	Caribbean	50.19	4.24	13.3	11.4877		10.34			6.14	9.84	3.38	0.14	0.28		51.4213
samp. 87-70	high-Ti	Caribbean	52.35	2.2	13.76	13.25		11.9223		0.21	5.33	7.73	4.73	0.11	0.2		44.3492	35.8		0	67		84	78		5	134	38		0		36	16	29															126
samp. 87-71A	low-Ti	Caribbean	45.5	1.35	17.31	10.4		9.35792		0.16	4.59	20.46	0.17	0.03	0.12		46.648			25	67		8	63		0	12	26		0		0	11	20															74
samp. M-2-A	high-Ti	Caribbean	51.31	1.97	14.56	10.9433		9.85			5.63	10.62	4.16	0.03	0.12		50.4675
samp. TDX-2-TU	high-Ti	Caribbean	50.22	2.13	15.81	15.0096		13.51			7.71	7.73	2.86	0.28	0.1		50.4288	43.1		75	27	39		490		2	96	38	130	4		140	4.5	21		8	4.4	1.1							4.6	0.73	1.4	1
samp. 85-G-694	low-Ti	Caribbean	52.44	1.25	15.29	12.3543		11.12			6.67	8.95	3.8	0.17	0.07		51.6728
samp. 85-G-695	low-Ti	Caribbean	47.68	1.07	15.76	9.82124		8.84			7.27	19.72	0.27	0.05	0.12		59.4484
samp. 85-G-698	low-Ti	Caribbean	50.58	1.58	16.53	13.2209		11.9			5.45	7.71	3.81	0.57	0.15		44.9458
samp. 5JE21A	low-Ti	Caribbean	48.88	1.26	10.28	12.39		11.1485		0.17	15.41	8.65	2.64	0.04	0.07	4.97	71.1314		258	1382	503	68.1				1.1	116.2	16.6	56	5.4		48.8	5.1	12	1.8	9	2.5	0.9	3.01	0.49	2.93	0.59	1.57	0.22	1.4	0.21	1.8	0.4	0.3
samp. 5JE01B	low-Ti	Caribbean	49.6	1.06	8.16	11.17		10.0508		0.17	13.93	14.85	0.86	0.12	0.07	0	71.1865		456	1925	268	68.1				1.8	114.8	13.2	56	3.7		23.7	3	8.2	1.316	6.9	2.3	0.8	2.38	0.43	2.56	0.54	1.32	0.2	1.07	0.15	0	0.2	0.2
samp. 5JE54	low-Ti	Caribbean	49.26	1.59	12.36	12.13		10.9146		0.15	10.9	10.37	2.84	0.15	0.12	1.36	64.0314		392	766	50	53.1				1.6	338.5	21.5	85	6.7		39.5	8	19.4	2.8	14.9	4.1	1.6	4.49	0.73	4.05	0.76	1.87	0.26	1.52	0.23	2.6	0.4	0.4
samp. FC9090	high-Ti	Caribbean	45.74	2.5	8.12	13		11.6974		0.22	20.99	8.09	0.89	0.05	0.19	5.3	76.1831		274	1341	465	81.8				2.1	76.8	22.9	121	13.1		25	9.9	24.1	3.45	17.6	4.6	1.65	5.03	0.82	4.51	0.85	2.17	0.28	1.64	0.24	3.4	1	0.9
samp. 5JE37B	high-Ti	Caribbean	48.29	2.08	7.55	12.72		11.4455		0.16	18.31	9.86	0.62	0.05	0.16	4.45	74.0375		274	1327	491	75				0.7	54	20.3	99	11.7		16.7	7.2	20.6	2.92	15.7	4	1.48	4.64	0.64	3.8	0.73	1.78	0.24	1.54	0.21	2.9	0.7	1.1
samp. FC9089	high-Ti	Caribbean	48.58	2.6	8.93	12.75		11.4725		0.15	16.2	9.05	1.36	0.01	0.21	4.57	71.5679		267	1047	377	71				0.5	75.6	24.5	115	12.5		20	9.2	24.1	3.31	18.5	4.7	1.56	4.69	0.85	4.8	0.85	2.34	0.29	1.81	0.27	3.1	0.9	1
samp. 02J5	high-Ti	Caribbean	47.73	2.21	8.87	13.21		11.8864		0.19	17.25	9.19	0.95	0.06	0.16	3.65	72.1213		287	1380	864	79				5	104	20	122	11		30	7.6	18.5	3.07	14.6	4.3	1.49	4.75	0.72	4.21	0.8	1.98	0.28	1.7	0.22	3	0.8	0.8
samp. 02J4	high-Ti	Caribbean	48.35	2.25	9.02	13.09		11.7784		0.19	16.18	9.08	1.35	0.15	0.15	3.55	71.0039		304	1310	699	72				7	157	21	128	10		56	7.4	19	3.13	15	4.8	1.39	4.99	0.79	4.53	0.86	2.24	0.29	1.8	0.27	3	0.9	0.9
samp. 02J7	high-Ti	Caribbean	49.42	2.59	9.26	12.2		10.9776		0.17	15.37	8.48	2.08	0.08	0.18	3.25	71.3946		301	1230	706	67				1	192	21	135	9		57	10.9	26	4.23	19.2	4.9	1.72	5.31	0.83	4.85	0.87	2.31	0.29	1.9	0.26	4	0.9	1.1
samp. JE9029	low-Ti	Caribbean	44.97	1.68	9.07	15.35		13.8119		0.17	18.25	9.34	0.66	0.08	0.13	5.8	70.197		275	1833	743	91.8				0.7	59.7	18.1	78	9.2		10.6	6.9	18.5	2.55	11.8	3.4	1.16	3.73	0.58	3.18	0.65	1.6	0.23	1.52	0.2	2.3	0.5	0.7
samp. JE9031B	low-Ti	Caribbean	47.71	1.64	9.59	14.18		12.7592		0.19	14.31	9.65	2.22	0.14	0.16	3.53	66.6583		325	1457	465	76.4				0.7	128.6	19.3	81	10.5		38.6	7.5	19.9	2.84	13	3.9	1.2	3.96	0.64	3.81	0.64	1.73	0.23	1.36	0.23	2.5	0.6	0.8
samp. JE9031C	low-Ti	Caribbean	48.25	1.61	9.5	13.82		12.4352		0.19	13.98	9.75	2.41	0.15	0.14	3.95	66.7113		325	1423	446	80				1.1	140.4	17.9	79	10.5		57.5	6.9	18.9	2.65	12.8	3.5	1.12	3.77	0.65	3.72	0.68	1.7	0.21	1.3	0.21	2.5	0.6	0.6
samp. JE9031A	high-Ti	Caribbean	47.29	2.09	10.28	14.37		12.9301		0.18	13.25	9.7	2.35	0.15	0.18	3.31	64.6228		336	1088	385	68.7				0.6	184.6	24	108	13.8		44.5	10.7	26.7	3.73	17.1	4.9	1.54	4.94	0.76	4.49	0.87	2.2	0.27	1.77	0.29	3.2	0.8	0.8
samp. 02J10	high-Ti	Caribbean	48.47	3.24	11.18	14.95		13.452		0.22	8.97	9.36	2.75	0.58	0.25	1.22	54.3098		510	109	40	53.9				17.1	303.3	28.9	138	16.9		116	14.8	34.1	4.72	24.1	7	2.43	6.26	1.1	5.63	1.07	3.01	0.4	2.29	0.37	4.6	1.2	0.8
samp. 02J11	high-Ti	Caribbean	48.72	1.99	12.59	15.2		13.677		0.15	7.14	10.69	2.99	0.28	0.19	0.95	48.2024		398	322	32	50.9				5.4	471.4	20.6	96	11.5		161	9.2	22.3	3.23	18.1	4.4	1.7	4.98	0.77	3.91	0.82	2.14	0.33	1.71	0.26	2.9	0.8	0.4
samp. 02J88	high-Ti	Caribbean	49.6	3.94	13.79	13.13		11.8144		0.22	6.42	10.35	2.07	0.07	0.39	2.45	49.2042		421	260	118	42				1	364	31	188	27		43	22.8	49.7	7.46	32.7	8.7	2.93	8.61	1.34	7.27	1.3	3.33	0.43	2.6	0.37	6	2.3	3.3
samp. JE9035	high-Ti	Caribbean	48.17	3.54	13.31	13.96		12.5612		0.16	6.75	10.86	2.54	0.29	0.36	2.11	48.925		377	253	134	45.6				3.9	404.3	33.1	201	32.1		70.9	21.3	56.5	7.31	33.1	7.9	2.5	7.2	1.19	6.29	1.18	2.96	0.35	2.27	0.35	5.7	1.9	1.7
samp. 02J91	high-Ti	Caribbean	49.17	4	13.75	13.77		12.3902		0.2	6.27	9.63	2.33	0.5	0.35	1.95	47.4255		433	227	133	43				5	357	30	184	27		187	24.9	56.6	8.31	36.9	8.6	2.66	8.53	1.29	6.72	1.3	3.45	0.45	2.8	0.39	6	2.3	3.2
samp. JE9036	high-Ti	Caribbean	49.13	3.45	13.3	13.86		12.4712		0.17	6.3	9.44	2.56	1.47	0.31	1.02	47.3821		406	171	107	49.5				22.3	382.4	31.8	207	32.6		431.8	22.3	59.3	7.6	33.2	8.5	2.53	7.45	1.24	6.7	1.12	2.92	0.36	2.39	0.36	5.9	1.8	1.9
samp. 02J12	high-Ti	Caribbean	56.02	2.49	13.91	11.88		10.6896		0.17	4.24	7.39	3.48	0.16	0.25	0.42	41.4196		386	48	10	32.9				3.1	414.3	16.7	128	24.4		95	18.6	34.6	4.3	21.2	4.3	1.13	3.35	0.64	3.38	0.67	1.55	0.22	1.59	0.24	3.2	1.7	1.4
samp. CCBP150/12R	low-Ti	Caribbean	46.6	1.23	14.07	11.4211		10.28		0.21	9	12.95	2.13	0.09	0.1	3.32	60.9471	45	315	329	115	0	143	58	16	1	114	23	60	4.4	0	11	2.99	7.97	1.38	6.8	2.41	86	3.33	0.6	4.06	0.86	2.43	0.34	2.41	0.37	1.67	0.25	0.23
samp. CCBP151/13/CC	high-Ti	Caribbean	46.78	2.74	14.28	12.7209		11.45		0.09	5.69	8.84	2.36	0.96	0.31	4.6	46.9733	39	406	320	133	50	126	56	22	38	301	31	150	20.2	0.7	51	16.4	36.7	4.91	25.5	6.7	2.17	6.23	0.96	5.54	1.16	2.8	0.4	2.37	0.34	4.1	1.14	1.7
samp. CCBP146/43E	low-Ti	Caribbean	46.88	0.97	13.72	10.9211		9.83		0.2	7.8	13.33	1.77	0.3	0.11	3.5	58.5829	45	296	340	156	76	132	55	16	5	125	22	46	3	0	13	2.9	6.7	1.11	5.9	2.3	0.83	2.95	0.55	3.63	0.82	2.29	0.4	2.14	0.39	1.4	0.17	0.2
samp. CCBP146/43E	low-Ti	Caribbean	48.42	1.08	14.77	11.3544		10.22		0.16	10.37	11.88	2.1	0.08	0.1	3.63	64.3969	44	296	363	121	0	125	54	14	1	126	19	54	3.4	0.03	12	2.45	6.85	1.09	5.82	2.15	0.8	2.67	0.52	3.33	0.72	2.04	0.31	1.94	0.31	1.43	0.19	0.19
samp. CCBP152/24/CCE	low-Ti	Caribbean	48.65	1.69	11.69	15.254		13.73		0.12	9.36	8.7	2.28	1.05	0.17	3.82	54.8578	53	459	251	56	0	44	115	17	24	96	33	77	2.5	0.37	7	2.17	6.52	1.24	7.5	3.07	1.1	4.54	0.83	5.87	1.27	3.81	0.55	3.6	0.53	2.19	0.14	0.12
samp. CCBP151/14R	high-Ti	Caribbean	48.69	3.33	12.6	13.1876		11.87		0.12	9.1	8.01	2.56	0.92	0.26	3.79	57.7452	43	491	410	132	0	222	132	25	15	333	29	189	26.4	0.13	80	15.83	38.83	5.58	25.89	6.52	2.29	7	1	6.14	1.15	2.98	0.41	2.29	0.33	4.82	1.64	1.62
samp. CCBP153.20R	high-Ti	Caribbean	49.29	1.79	13.71	13.4764		12.13		0.28	10.32	9.5	2.52	0.1	0.12	4.12	60.2637	60	506	149	90	0	192	106	19	2	162	24	89	6.1	0.01	20	4.12	11.21	1.76	9.24	3.12	1.2	4.1	0.65	4.54	0.97	2.74	0.42	3.08	0.49	2.44	0.4	0.4
samp. AHBD09	low-Ti	Caribbean	48.96	1.43	13.9	13.77		12.3902		0.22	6.7	11.32	2.82	0.06	0.12		49.0816		363	166	282	50.2			18.4		387	29.9	65.6	3.85		49	4.9	11.56	1.89	9.14	3.06	1.13	3.88	0.73	4.79	0.98	2.83	0.44	2.94	0.45	1.72	0.22	0.36
samp. AHBD10	low-Ti	Caribbean	48.94	1.47	13.85	14.43		12.9841		0.25	7.36	11.06	1.9	0.02	0.12		50.2599		370	166	112	50.4		51.3	17.9	0	197	28.8	70.1	4.21		41	4.91	10.93	1.72	8.67	2.9	1.07	3.65	0.67	4.59	0.91	2.8	0.43	2.83	0.45	1.76	0.27	0.31
samp. AHBD11	low-Ti	Caribbean	48.5	1.08	14.02	11.35		10.2127		0.45	9.25	10.1	4.32	0.05	0.11		61.7524		257	368	389	42.1			14.7		129	21	42.1	2.47		221	3.52	8.81	1.45	6.97	2.31	0.88	2.87	0.53	3.43	0.69	1.95	0.3	1.97	0.3	1.14	0.15	0.33
samp. AHBD13	low-Ti	Caribbean	50.06	1.41	13.54	13.48		12.1293		0.28	7.74	8.88	3.78	0.03	0.12		53.2166		337	137	157	48.3		43	14.8	0.1	55	26.2	66.3	3.79		26	4.47	9.9	1.58	7.96	2.71	1	3.4	0.63	4.26	0.84	2.54	0.39	2.57	0.4	1.71	0.23	0.29
samp. AHBD14	low-Ti	Caribbean	52.24	1.41	13.06	13.34		12.0033		0.24	7.01	9.79	2.51	0.04	0.12		51.0053		345	152	140	47.9		44.3	13.5	0.6	384	27	66	3.9		124	4.86	10.2	1.61	8.19	2.74	1.01	3.49	0.64	4.35	0.87	2.6	0.4	2.63	0.41	1.71	0.22	0.29
samp. AHBD16	low-Ti	Caribbean	52.06	1.35	13.08	13.25		11.9223		0.37	7.93	9.19	2.63	0	0.1		54.2473		341	137	79	48.6		44.7	14.2	0	74	26.1	64.2	3.85		43	3.5	9.27	1.48	7.82	2.55	0.99	3.39	0.59	4.13	0.81	2.51	0.39	2.5	0.39	1.79	0.24	0.24
samp. AHBD18	low-Ti	Caribbean	51	1.65	13.76	14.95		13.452		0.22	6.88	7.65	4.62	0.42	0.12		47.6905		376	98	58	46.3		49.4	15.8	1.6	30	30.3	80.5	4.64		41	4.79	11.47	1.74	9.02	2.99	1.09	3.74	0.69	4.86	0.96	2.93	0.45	3.01	0.49	2.02	0.24	0.31
samp. AHBD19	low-Ti	Caribbean	52.18	1.32	13.65	12.92		11.6254		0.25	7.34	9.67	2.65	0.05	0.11		52.9518		315	90	105	47.9			15.2		1031	25	64	3.88		935	4.67	9.64	1.55	7.61	2.63	1.08	3.28	0.6	4	0.82	2.32	0.36	2.32	0.32	1.68	0.23	0.29
samp. AHBD20	low-Ti	Caribbean	52.45	1.26	12.83	11.88		10.6896		0.41	7.88	10.04	1.74	0.16	0.1		56.7858		284	111	69	40.7		40	12.9	0.4	374	23.1	56.5	3.35		1795	3.15	8.44	1.35	7.09	2.3	1.14	3	0.53	3.71	0.72	2.25	0.34	2.2	0.35	1.58	0.22	0.22
samp. AHBD23	low-Ti	Caribbean	50.74	1.09	14.47	11.68		10.5097		0.76	9.06	8.5	3.61	0.11	0.08		60.5787		255	329	159	41.9		42.5	12.9	0.6	49	19	49.2	2.79		153	2.2	6.89	1.15	6	1.95	0.72	2.56	0.45	3.05	0.59	1.86	0.29	1.83	0.3	1.4	0.18	0.19
samp. AHBD24	low-Ti	Caribbean	50.8	1.44	13.39	13.98		12.5792		0.31	7.8	9.39	2.5	0.26	0.11		52.5015		350	156	68	48.1		42	15.3	1.4	837	26.6	71.4	4.08		848	4	10.13	1.52	7.88	2.68	1.11	3.4	0.63	4.41	0.87	2.62	0.41	2.67	0.43	1.82	0.21	0.27
samp. AHBD25	low-Ti	Caribbean	48.21	1.31	13.95	12.99		11.6884		0.27	8.14	11.72	2.95	0	0.09		55.3854		318	230	116	46		37.5	17.5	0.4	192	23.2	63.4	3.46		14	4	9.78	1.35	6.85	2.45	0.9	2.87	0.57	3.85	0.75	2.21	0.34	2.29	0.34	1.41	0.14	0.26
samp. AHBD26	low-Ti	Caribbean	51.11	1.41	13.33	12.55		11.2925		0.26	6.74	9.25	3.31	0.04	0.11		51.5491		318	86	78	42.5		35.9	13.8	0.7	166	24.4	71.6	4		135	4.3	10.23	1.42	7.24	2.58	0.95	3.08	0.6	4.25	0.83	2.41	0.37	2.53	0.39	1.66	0.16	0.28
samp. AHBD27	low-Ti	Caribbean	52.56	1.07	14.47	11.52		10.3657		0.15	7.45	10.27	2.78	0.04	0.15		56.1629		197	252	105	39		49.5	15.2	0.2	187	34.3	88.1	5.29		32	5.35	13.9	2.19	11.23	3.44	1.28	4.47	0.77	5.39	1.05	3.31	0.51	3.17	0.55	2.35	0.34	0.38
samp. AHBD28	low-Ti	Caribbean	52.36	1.29	13.92	12.01		10.8066		0.19	7.74	7.67	3.91	0.07	0.1		56.0775		303	231	87	43.3		36.8	11	0.1	58	24.6	62.1	3.77		2215	3.25	8.89	1.43	7.75	2.5	1.08	3.26	0.57	3.9	0.75	2.35	0.36	2.29	0.36	1.63	0.24	0.24
samp. AHBD29	low-Ti	Caribbean	50.67	1.27	13.64	12.33		11.0945		0.17	7.89	9.59	3.34	0.11	0.11		55.9025		308	241	114	44.8		34.9	13.7	0.2	183	24.2	61	3.8		75	3.82	10.18	1.51	7.72	2.64	0.89	3.01	0.57	3.92	0.77	2.36	0.36	2.37	0.39	1.57	0.15	0.25
samp. AHBD30	low-Ti	Caribbean	44.36	1.6	14.65	18.92		17.0242		0.21	6	8.44	5.38	0.21	0.12		38.5844		362	44	55	45.5		39.1	17.8	3.1	150	30.3	92	5.46		479	4.6	11.71	1.67	8.42	3.13	1.23	3.67	0.71	4.88	1.01	2.95	0.45	3.04	0.46	2.08	0.2	0.34
samp. 04OT1	low-Ti	Caribbean	56.08	0.61	14.86	7.6		6.83848		0.06	8.05	4.44	1.96	1.73	0.13	4.48	67.7252									8.93	305	12	26.1	0.84	0.18	212	4.25	9.76	1.4	6.46	1.69	0.54	1.82	0.3	1.89	0.41	1.21		1.12	0.17	0.72	0.05	0.63
samp. 04OT2	low-Ti	Caribbean	50.94	0.81	16.52	8.75		7.87325		0.16	5.4	8.17	3.79	2.26	0.28	2.92	55.0079									54.6	756	17.3	78.8	3.12	0.42	553	18.4	39.8	5.1	22.1	4.58	1.32	3.9	0.53	2.89	0.56	1.49		1.36	0.21	1.92	0.13	2.31
samp. 040T4A	low-Ti	Caribbean	49.61	1.05	14.29	11.11		9.99678		0.19	7.36	12.67	1.81	0.1	0.08	1.73	56.755									78.6	1042	19.4	99.9	3.49	0.87	775	22.1	48.2	6.38	26.8	5.53	1.56	4.29	0.59	3.19	0.61	1.68		1.53	0.24	2.44	0.15	3.13
samp. 040T4B	low-Ti	Caribbean	49.81	0.81	14.64	10.23		9.20495		0.17	8.63	13.74	1.49	0.04	0.09	0.35	62.5642									75.8	1123	19.7	105	3.69	0.85	702	23.1	50.5	6.62	27.9	5.63	1.59	4.41	0.62	3.28	0.65	1.77		1.59	0.25	2.55	0.16	3.29
samp. 040T5	low-Ti	Caribbean	48.07	0.78	16.49	10.87		9.78083		0.2	6.01	6.37	2.32	3.53	0.12	5.24	52.275									72.2	777	20.1	108	3.91	0.91	605	21.1	46.4	6.04	25.4	5.08	1.47	4.26	0.61	3.27	0.65	1.83		1.66	0.26	2.59	0.18	2.97
samp. 040T7	low-Ti	Caribbean	51.24	0.76	15	9.08		8.17018		0.18	6.65	9.08	2.22	2.45	0.27	3.08	59.1988									60.9	808	19.2	104	3.89	0.43	677	21.8	47	6.08	25.4	5.09	1.44	4.11	0.57	3.08	0.6	1.67		1.55	0.24	2.5	0.17	3.14
samp. 04SD04	low-Ti	Caribbean	48.51	0.73	15.55	8.23		7.40535		0.15	5.23	8.61	2.23	2.91	0.24	7.63	55.7315									0.91	105.07	24.73	43.2	4.09	0.05	477.44	3.39	8.27	1.39	7.23	2.37	0.9	3.7	0.62	3.75	0.86	2.47		2.99	0.41	1.32	0.34	0.23
samp. 04SD05	low-Ti	Caribbean	51.7	0.76	16.69	8.19		7.36936		0.14	4.99	8.24	2.55	2.77	0.24	3.75	54.6904									0.79	97.77	20.27	29.95	2.73	0.05	176.8	2.64	6.26	1.01	5.18	1.79	0.66	2.82	0.49	3.09	0.66	1.88		2.21	0.32	0.85	0.17	0.16
samp. 04L05	low-Ti	Caribbean	50.07	0.44	9.7	9.54		8.58409		0.18	11.71	14.21	1.28	0.47	0.13	2.27	70.86									18.96	403.71	33.75	110.43	3.42	0.28	255.35	10.37	24.16	3.52	16.96	4.41	1.41	5.24	0.85	4.99	1.06	3.12		3.81	0.53	2.79	0.19	2.21
samp. 04L10	low-Ti	Caribbean	50.45	0.71	14.45	9.33		8.39513		0.16	8.27	11.55	1.79	1.96	0.23	1.09	63.7157									9.62	388.65	37.56	118.8	1.91	0.44	542.19	8.11	19.61	3.02	15.04	4.22	1.23	5.16	0.87	5.37	1.21	3.51		4.26	0.64	3.13	0.11	1.37
samp. 04LD01	low-Ti	Caribbean	50.69	0.54	15.95	7.41		6.66752		0.17	5.6	11.85	2.65	0.37	0.1	4.68	59.9548									10.36	293.41	20.78	42.23	1.16	0.16	43.49	4.21	9.91	1.56	7.57	2.29	0.79	3.08	0.51	3.08	0.68	2.04		2.42	0.35	1.2	0.07	0.64
samp. 04GW-01	low-Ti	Caribbean	53.7	1.14	15.23	11.24		10.1138		0.14	3.83	4.73	5.21	0.93	0.17	3.68	40.3003									9.04	315.17	20.12	38.08	1.05	0.15	35.13	4.69	9.12	1.55	7.39	2.12	0.79	2.99	0.49	2.94	0.67	1.9		2.44	0.35	1.05	0.06	0.61
samp. A09SP6	low-Ti	Caribbean	49.5	0.29	12	8.9991		8.1		0.18	16.6	11.3	0.94	0.014			78.5094										20.3	5.4	6.3	0.5		2.8	0.4	0.8							1.2				1
samp. A10SP1	low-Ti	Caribbean	48.7	0.52	12.9	10.4434		9.4		0.19	13.2	11.5	1.75	0.024			71.4547										44.4	10.4	17.3	1.2		5.7	0.4	1							2.1				1.4
samp. A12SP2	low-Ti	Caribbean	49.8	0.41	14.8	9.7768		8.8		0.13	9.9	12.6	2.05	0.048			66.7266										60.9	12.1	20.5	1.2		7.9	0.7	1.7							1.8				1.4
samp. B01SP1	low-Ti	Caribbean	48.3	0.5	13.5	10.8878		9.8		0.19	12.4	10.9	1.47	0.034			69.2829										41.6	14.1	24.2	0.4		24.3	0.8	1							2.2				1.2
samp. B01SP3	low-Ti	Caribbean	48.4	0.6	14.9	10.6656		9.6		0.2	10.2	12.5	1.8	0.027			65.4457										44.4	17.9	26.9	0.3		14.8	0.7	1.3							2.8				1.6
samp. B03SP2	low-Ti	Caribbean	47.5	0.22	11	10.7767		9.7		0.19	20.3	9.1	0.81	0.033			78.8609										26.1	8.7	8.5	0.8		17.2	0.8	1.8							1.3				0.9
samp. B03SP4	low-Ti	Caribbean	51	0.59	18.4	6.9993		6.3		0.09	6	11.3	2.94	0.09			62.9314										32.9	15.8	24.2	0.1		4.3	0.1	1.2							2.4				1.4
samp. B06SP2	low-Ti	Caribbean	47.6	0.28	11.7	10.2212		9.2		0.14	18.7	10.8	1.43	0.036			78.3704										74.7	21.1	40.8	0.3		6.1	1.2	3.1							3.6				2.5
samp. B09SP1	low-Ti	Caribbean	50.9	0.44	14.4	10.6656		9.6		0.15	11.7	11.4	1.59	0.074			68.4793										52.3	19	29.1	1.4		23.7	1.3	3.1							2.8				1.4
samp. B10SP1	low-Ti	Caribbean	51.7	0.15	11.1	8.2214		7.4		0.15	17.8	9.9	0.79	0.015			81.0887										13.3	4.7	6.7	0.1		4.5	0.2	0.8							1				0.5
samp. D02SP1	low-Ti	Caribbean	47.1	0.3	11.4	12.1099		10.9		0.21	17.5	8.9	1.2	0.022			74.1063										34.6	12	14.4	0.9		4.1	1	1.8							1.8				1.3
samp. D06SP2	low-Ti	Caribbean	49.4	0.37	11.4	14.7763		13.3		0.6	9.7	11.9	1.42	0.291			56.5232										239	11.6	22	0.4		189.3	3.4	5.5							1.5				1
samp. D15SP1	low-Ti	Caribbean	46.6	0.39	11.2	9.999		9		0.18	20	10.2	1.27	0.017			79.844										44.2	11.5	18.2	1		2.5	0.5	1.9							2.6				1.4
samp. D22SP1	low-Ti	Caribbean	51.6	0.23	13.2	9.6657		8.7		0.17	13	10.5	0.98	0.006			72.7047										11	8.5	8.9			1.2	0.3	1.9							0.9				0.8
samp. D29SP2	low-Ti	Caribbean	50.5	0.43	15.5	9.6657		8.7		0.17	8.6	13	1.68	0.009			63.7956										24.8	15.7	21.8	0.5		1.3	0.6	0.6							2.5				1.3
samp. D30SP1	low-Ti	Caribbean	50.4	0.19	11	12.5543		11.3		0.26	17	9	0.94	0.029			72.8391										28.2	6.1	9.7	1.2		14.3	0.4	1							1.2				0.9
samp. D36SP4	low-Ti	Caribbean	48.8	0.38	14.5	11.3322		10.2		0.23	12.5	10.8	1.19	0.055			68.5983										24.3	15.9	14.6	0.2		1.6	0.7	0.4							2.9				1.5
samp. D41SP1	low-Ti	Caribbean	49.9	0.49	14.7	7.1104		6.4		0.13	11.8	13.6	1.54	0.01			76.6717										33	18.5	22.3			1.6	0.3	1.3							3.5				1.8
samp. A01SP1	low-Ti	Caribbean	47.9	0.74	11.8	10.5545		9.5		0.18	17.9	10	1.24	0.069			77.0577										93	16.2	52.3	4		12.9	2.5	7.4							2.3				1.1
samp. A02SP4R	low-Ti	Caribbean	52.6	0.94	14.6	8.5547		7.7		0.13	8.8	12.8	1.8	0.118			67.0753										118	15.1	51	4.8		30.3	4.1	11.2							3.3				1.3
samp. A02SP4S	low-Ti	Caribbean	52.3	1	14.4	8.5547		7.7		0.1	8.9	12.6	1.89	0.112			67.3244										115	16	48.8	5.2		26	4.3	10.6							3.1				1.5
samp. A03SP5	low-Ti	Caribbean	50.2	0.83	12.7	9.6657		8.7		0.15	12.7	11.6	1.48	0.063			72.2389										76.8	9.1	23	4		15.7	1.3	3.1							2.3				1.3
samp. A04SP6	low-Ti	Caribbean	48.4	0.67	12.2	10.7767		9.7		0.16	11.5	12	1.31	0.006			67.8805										15	11.8	20.4	0.6		1.1	0.3	1.2							2.8				1.4
samp. A08SP2	low-Ti	Caribbean	50.8	0.7	13.4	8.6658		7.8		0.15	12.6	11.6	1.55	0.056			74.2239										82	6.6	16.6	2.8		10.4	1.4	2.7							1.6				1.1
samp. A09SP2	low-Ti	Caribbean	51.9	0.55	13.2	10.2212		9.2		0.15	9.9	12.4	1.76	0.056			65.7325										66	10.1	20.1	3.1		15	1.7	3.3							2				1.1
samp. B02SP2	low-Ti	Caribbean	50.7	1.24	14.8	9.8879		8.9		0.17	10.5	9.7	3.29	0.016			67.7736										18.2	22	98.4	7.8		1.7	0.3	3.9							3.1				1.6
samp. B03SP1	low-Ti	Caribbean	52.6	0.8	14.3	9.4435		8.5		0.14	8.4	10.4	2.8	0.053			63.7893										68	16.3	70.8	12.5		11.5	1.3	5.4							2.8				1.3
samp. B03SP5	low-Ti	Caribbean	47.7	0.78	12.2	9.2213		8.3		0.19	14.5	11.3	1.32	0.035			75.6936										79.2	27.1	51.3	0.6		6.4	1	2.8							4.8				3.2
samp. D07SP1	low-Ti	Caribbean	47.7	1.53	11.4	11.11		10		0.14	16.7	9.7	1.58	0.098			74.8549										102.6	16.5	76.1	7.5		23.4	4.7	11.4							3.2				1.6
samp. D07SP3L	low-Ti	Caribbean	50.6	0.55	13.3	10.3323		9.3		0.18	12.3	11.5	1.57	0.063			70.2169										81	11.9	31.8	3.8		12.3	3.6	7.6							2.2				0.9
samp. D07SP3U	low-Ti	Caribbean	50.5	0.55	13.1	10.4434		9.4		0.16	12.5	11.3	1.56	0.065			70.3304										79.8	11.5	30.5	3.6		14.6	3.9	8.2							1.9				1.4
samp. D08SP1	low-Ti	Caribbean	49	1.21	11.4	11.9988		10.8		0.19	14.7	9.8	1.37	0.078			70.8139										106.3	16.9	68.9	6.2		18	4.4	9.6							2.5				1.5
samp. D11SP1	low-Ti	Caribbean	53.8	0.79	15.3	6.8882		6.2		0.08	9	11.7	1.96	0.028			72.1264										65.3	17.2	35.5	0.8		6.2	1	1.9							3.6				2.2
samp. D13SP2	low-Ti	Caribbean	52.1	0.69	13.4	9.5546		8.6		0.13	12.1	11.3	1.76	0.053			71.4942										56	12.8	29.5	3.4		9.4	1.5	4.8							2.4				1.5
samp. D18SP1	low-Ti	Caribbean	48.6	1.69	14	9.999		9		0.14	10.2	10.9	3.14	0.032			66.8903										53.6	21.3	104	15.9		28	2.1	7.6							2.7				1.4
samp. D18SP2	low-Ti	Caribbean	47.8	0.77	14.1	11.3322		10.2		0.21	10.9	12.3	1.33	0.158			65.5756										202.4	22.2	56.2	5.9		55.5	11.2	13.4							3.4				1.9
samp. D24SP1	low-Ti	Caribbean	48.7	0.75	11.5	10.2212		9.2		0.2	15.8	10.4	1.47	0.03			75.3779										75.1	23.5	45.5	0.5		3.6	0.3	3.6							2.7				1.5
samp. D28SP1	low-Ti	Caribbean	50.7	0.58	11.9	7.8881		7.1		0.1	13.7	12.5	1.05	0.052			77.4756										75.8	8.3	31.2	4.7		12.4	4.3	8.4							1.7				0.9
samp. D34SP3	low-Ti	Caribbean	49.3	0.69	13.3	9.4435		8.5		0.18	12.9	11.2	1.61	0.042			73.0119										57.1	14.6	36.7	2		9.7	3.9	4							2.4				1.3
samp. A03SP1	low-Ti	Caribbean	50.9	0.57	14.1	8.888		8		0.12	10.4	13.2	2.06	0.068			69.8555										140.9	44.3	114.5	3.3		22.7	2.3	6							5.2				2.4
samp. A05SP1	low-Ti	Caribbean	49.1	0.55	14.9	9.7768		8.8		0.17	10.4	13	1.95	0.023			67.8114										69.4	13.1	24	0.5		4.9	0.3	0.9							3.7				2.2
samp. A07SP2A	low-Ti	Caribbean	48.5	0.79	14.3	10.8878		9.8		0.2	10.4	12.9	1.38	0.008			65.4185										12.7	10.7	14.9	0.6		5.1	0.3								3.2				1.8
samp. A07SP2B	low-Ti	Caribbean	48.9	0.75	14.4	10.6656		9.6		0.14	10.4	12.9	1.42	0.009			65.8835										13	11.3	14.8	0.3		2.4	0.4								2.7				1.5
samp. A08SP1	low-Ti	Caribbean	51.6	0.68	15.2	7.3326		6.6		0.13	10	13	2.2	0.022			72.9794										55.3	13.4	24.6	0.5		2.9		0.9							3.1				1.6
samp. A08SP3	low-Ti	Caribbean	50.1	0.7	14.9	10.1101		9.1		0.16	9.6	12.4	1.99	0.039			65.2841										52.5	10.4	33.6	11.3		8.8	0.9	2.7							2.9				1.5
samp. A13SP2	low-Ti	Caribbean	48.2	0.54	12.9	8.888		8		0.16	12.7	13.6	1.94	0.025			73.8893										68.6	14.4	24.4	0.7		3.9	0.5	1.1							4.4				2.9
samp. A14SP2	low-Ti	Caribbean	49.8	0.54	13.5	8.9991		8.1		0.18	11.2	13.9	1.97	0.027			71.1384										66.1	17	24	0.3		5.2	0.2	1							3.4				1.8
samp. B05SP1	low-Ti	Caribbean	49.5	0.53	15.8	8.2214		7.4		0.11	8.8	13.6	1.85	0.008			67.947										24.8	22.8	14.8	0.3		1.1	0.3	0.6							3.5				2.2
samp. B05SP2	low-Ti	Caribbean	48.5	0.54	15.7	8.3325		7.5		0.11	9	13.4	1.87	0.084			68.1437										88.7	14.8	45.7	4.5		20.6	3.8	8.3							3.3				1.7
samp. B10SP2	low-Ti	Caribbean	48.8	0.64	14.5	8.3325		7.5		0.16	11.1	13.7	1.91	0.033			72.5141										73.4	19	39	0.4		4.2	0.5	2.7							3.1				1.9
samp. B12SP1	low-Ti	Caribbean	48.3	0.67	14.7	9.7768		8.8		0.2	12	12.9	1.82	0.038			70.8522										85.3	19.2	42.8	0.8		6.6	0.9	3							2.7				1.9
samp. D01SP1	low-Ti	Caribbean	49.7	0.57	15.9	8.7769		7.9		0.12	9.9	13.6	1.98	0.038			69.0773										80.9	19.9	41.1	0.3		6.8	0.7	2.5							3				1.8
samp. D04SP2	low-Ti	Caribbean	50.9	0.58	14.7	8.4436		7.6		0.17	9.9	11.8	1.92	0.039			69.8981										73.1	16.2	36.6	0.3		8.5	0.7	1.8							2.3				1.6
samp. D05SP1	low-Ti	Caribbean	50.1	0.55	16.1	8.3325		7.5		0.13	9	13.6	1.84	0.033			68.1437										76.6	26	42.8	0.2		6	1.1	2.6							3.7				2.3
samp. D05SP2	low-Ti	Caribbean	49.2	0.57	14.5	9.2213		8.3		0.11	9.1	13.4	1.95	0.031			66.1522										73	21.9	41.5	0.6		10.9	1.2	2.2							3.3				2.3
samp. D10SP1	low-Ti	Caribbean	49.1	0.7	14	9.3324		8.4		0.16	11.5	13.2	1.87	0.033			70.934										80.9	21.3	44.2	0.8		6.5	1.3	2.8							3.2				1.8
samp. D19SP1	low-Ti	Caribbean	49.5	0.64	15.3	9.6657		8.7		0.14	9.5	13.2	1.85	0.029			66.0614										73.4	24.5	46.6	0.7		8.6	0.7	2.7							4.2				3.1
samp. D23SP1	low-Ti	Caribbean	49	0.65	14.9	9.1102		8.2		0.14	10	13.1	1.62	0.036			68.4928										77.9	19.1	44.7	2.2		10.9	3.6	2.9							3.9				2
samp. D25SP1	low-Ti	Caribbean	49.4	0.67	14.7	8.2214		7.4		0.12	10.5	13.2	1.79	0.027			71.6661										66.3	20.7	39.4	0.5		5.1	0.8	2.9							3.1				2.1
samp. D25SP2	low-Ti	Caribbean	47.6	0.59	14	9.8879		8.9		0.2	12.2	12.6	1.73	0.027			70.9601										42.9	16.6	31.1	0.5		15.8	0.5	2							3				1.6
samp. D31SP1	low-Ti	Caribbean	49.8	0.54	15.4	9.6657		8.7		0.17	9	13.2	1.92	0.028			64.8389										67.7	17.7	41.1	0.7		3.9	1.1	1.6							3.9				2
samp. D32SP1	low-Ti	Caribbean	49.6	0.59	15	8.7769		7.9		0.13	10	13.2	1.74	0.028			69.2916										71.9	21.4	45.3	0.3		4.7	1.4	2.1							3.5				2.3
samp. D33SP1	low-Ti	Caribbean	49	0.6	14.8	10.1101		9.1		0.16	10	12.3	1.9	0.028			66.2035										73.4	19.8	36.3	0.6		7.5	1	2.3							3.4				1.9
samp. D37SP2	low-Ti	Caribbean	48.5	0.61	15.1	9.8879		8.9		0.15	9.7	12.7	1.68	0.029			66.0189										75.6	17.5	41.3	0.4		5	0.5	2.7							3.2				1.7
samp. D38SP2	low-Ti	Caribbean	50.8	0.62	15.5	8.888		8		0.14	8.4	13.7	1.89	0.038			65.1776										70	18.9	40	0.3		4.8	1	2.5							3.4				1.8
samp. D40SP2	low-Ti	Caribbean	49.5	0.66	14.2	8.7769		7.9		0.21	10.1	13.6	1.79	0.027			69.5029										73.4	23.4	45.3	0.4		4.4	0.7	2.2							4				2.7
samp. D40SP3	low-Ti	Caribbean	48.7	0.72	14.6	8.4436		7.6		0.12	10.7	13.1	1.65	0.027			71.5074										71.8	21	40.8	0.2		6.1	0.8	2.7							3.7				2.3
samp. D42SP2	low-Ti	Caribbean	49.7	0.66	14.9	8.888		8		0.14	10.6	13.5	1.75	0.028			70.2551										68.4	19.3	39.2	0.5		5.4	0.7	2.8							3				1.8
samp. A1OL1	low-Ti	Caribbean	49.7	0.47	14.9	8.2214		7.4		0.12	11.4	13.6	1.39	0.011			73.3059										30.8	16.8	20.4			3.4	0.3	1.4							2.9				1.6
samp. A3OL1	low-Ti	Caribbean	50.3	0.51	14.8	7.1104		6.4		0.08	12.2	13.1	1.69	0.011			77.2626										34.2	16.6	20.8			2.7	0.4	0.7							2.7				1.7
samp. A3OL2	low-Ti	Caribbean	49	0.42	15.1	9.3324		8.4		0.16	10.6	14	1.09	0.008			69.2256										27	13.7	17.9	0.3		2.5	0.9	1.5							2.4				1.5
samp. A5OL1	low-Ti	Caribbean	50.2	0.52	15	6.9993		6.3		0.07	12.2	13	1.63	0.011			77.5381										32.9	17.4	21.9			3.2	0.3	1.1							2.6				1.4
samp. A6OL1	low-Ti	Caribbean	50.3	0.5	14.9	6.9993		6.3		0.08	13	12.9	1.6	0.01			78.6249										31.5	16.8	20.1			3.5	0.3	0.8							3.2				1.5
samp. GOR-94-3	low-Ti	Caribbean	45.06	0.49	8.07	11.56		10.4017		0.17	28.61	6.56	0.31	0.05	0.04	3.69	83.0595	32	186		1018	85.6	91	70	10	0.87	36	10	21	0.33		3.17	0.6	1.96	0.42	2.58	1.11	0.52	1.77	0.34	2.11	0.44	1.2	0.18	1.06	0.16	0.69		0.04
samp. GOR-94-4	low-Ti	Caribbean	44.88	0.49	8.15	11.68		10.5097		0.17	28.12	6.82	0.33	0.02	0.04	3.32	82.6676	29	163		1228	90.4	90	66	9	0.6	30	10	20	0.52		1.718	0.56	1.83	0.37	2.22	0.97	0.45	1.52	0.29	1.83	0.38	1.05	0.16	0.94	0.14	0.63		0.05
samp. GOR-94-17	low-Ti	Caribbean	47.8	0.55	9.15	11.82		10.6356		0.17	23.36	7.46	0.51	0.01	0.04	2.36	79.6551	34	190		935	88.4	95	69	10	0.65	37	11	22	0.51		1.831	0.61	2.03	0.42	2.57	1.13	0.52	1.79	0.34	2.14	0.45	1.21	0.18	1.08	0.16	0.72		0.06
samp. GOR-94-28	low-Ti	Caribbean	44.38	0.53	8.89	11.72		10.5457		0.17	25.36	7.42	0.51	0.03	0.04	1.98	81.0847	32	180		1082	87.3	91	68	10	0.8	38	11	21	0.42		2.467	0.57	1.91	0.4	2.44	1.07	0.5	1.72	0.32	2.05	0.43	1.16	0.17	1.04	0.15	0.69		0.04
samp. GOR-94-44	low-Ti	Caribbean	45.53	0.57	9.59	11.81		10.6266		0.18	24.74	8.02	0.51	0.02	0.04	2.43	80.5827	33	186		1050	84.4	96	67	10	0.64	37	11	22	0.4		2.048	0.57	1.93	0.4	2.5	1.1	0.51	1.76	0.33	2.09	0.43	1.19	0.18	1.05	0.16	0.69		0.04
samp. G22	low-Ti	Galapagos	47.42	1.25	13.92	12		10.7976		0.28	7.65	12.33	2.27	0.24	0.105		55.8098		320	243	94	50	126	92	25	6	119	24	64	13	0.009	117		8.942		7.55	2.523	0.959	3.407	0.618	4.051	0.855	2.327	0.359	2.319	0.346	1.824	0.216
samp. G22	low-Ti	Galapagos	47.92	1.24	14.04	11.99		10.7886		0.28	7.96	12.34	2.39	0.23	0.097		56.8075		315	239	93	50	131	92	20	4	120	27	67	7		77
samp. G30	high-Ti	Galapagos	47.55	2.88	13.55	13.84		12.4532		0.17	6.61	9	3.18	1.26	0.265		48.617		383	72	81	50	136	137	23	14	254	32	173	22	0.186	249	0	30.646	0	21.312	5.985	2.07	6.62	1.048	6.151	1.174	2.961	0.427	2.619	0.36	4.651	0.942	8
samp. G33	high-Ti	Galapagos	46.52	2.93	13.31	13.85		12.4622		0.23	6.38	9.33	3.45	0.6	0.282		47.7148		383	57	60	50	72	118	21	6	253	39	177	24	0.21	238	23	32.216	0	22.169	6.038	2.099	6.849	1.083	6.439	1.246	3.147	0.452	2.775	0.387	4.659	0.942	0
samp. G33	high-Ti	Galapagos	46.91	2.91	13.45	13.87		12.4802		0.23	6.59	9.35	3.56	0.59	0.275		48.4872		390	66	64	51	72	120	19	7	252	37	177	23		235	23		0														0
samp. G42	high-Ti	Galapagos	46.41	2.9	14.25	11.57		10.4107		0.17	6.16	11.01	2.7	1.12	0.322		51.3324		294	97	72	34	89	131	23	25	465	31	211	36	0.281	187	24	48.326	0	28.43	6.81	2.215	6.548	0.956	5.152	0.906	2.13	0.275	1.565	0.198	2.842	1.633	0
samp. G44	high-Ti	Galapagos	47.45	3.99	15.62	12.2		10.9776		0.17	4.16	9.59	3.53	1.29	0.44		40.317		339	31	36	33	119	104	27	27	517	36	294	49	0.239	254	51	67.073	0	37.427	8.771	2.793	8.479	1.273	7.04	1.265	2.999	0.4	2.302	0.297	2.148	2.51	9
samp. G46	high-Ti	Galapagos	47.7	2.68	13.65	11.99		10.7886		0.18	7.18	11.62	2.68	0.45	0.258		54.2614		318	171	99	45	131	98	21	6	412	25	169	29		99			8														0
samp. G54	low-Ti	Galapagos	47.74	1.66	13.33	12.94		11.6434		0.2	7.19	11.36	3.08	0.09	0.133		52.3985		346	164	83	49	221	87	22	0	129	36	92	16	0.009	51		14.302		10.755	3.533	1.279	4.574	0.811	5.341	1.111	3.072	0.465	3.011	0.441	2.559	0.386
samp. G63	low-Ti	Galapagos	48.04	1.27	13.93	12.07		10.8606		0.2	7.93	11.65	2.79	0.12	0.096		56.5515		320	293	104	45	133	84	15	0	191	26	71	9	0.205	38		9.054		7.705	2.65	0.984	3.542	0.63	4.127	0.874	2.363	0.361	2.375	0.346	1.932	0.221
[truncated: 21 more columns]

## Sheet: Table S2
Sample	Type	Location	%ol addition	SiO2 (wt%)	TiO2	Al2O3	Cr2O3	Fe2O3	FeO	MnO	MgO	CaO	Na2O	K2O	NiO	P2O5	T(°C)	TP_AFM	TP new	KD	Xfo	F_AFM	Proj F1	Proj F2	Proj F3	Residual Lithology	FeOsource	MgOsource	Fe2O3/TiO2
samp. 11	high-Ti	Wrangellia	34.6685	46.7154	0.989937	10.6711	0	0.48938	10.2852	0.174934	19.4584	9.49214	1.5107	0.120572	0	0.0922021	1424.63	1560.63	1549.7	0.299498	0.918419	0.262071	0.287685	0.262071	0.262226	Spinel Peridotite	8.02	38.12	0.5
			29.9764	46.9983	1.03497	11.1644	0	1.02482	9.73787	0.177639	18.1303	9.92705	1.58178	0.126245	0	0.0965406	1403.47	1532.7	1515.92	0.301406	0.916734	0.260788	0.275328	0.260788	0.285028	Spinel Peridotite	8.02	38.12	1
samp. 5727A2	low-Ti	Wrangellia	27.6331	48.6419	0.418426	11.1603	0	0.207312	10.284	0.185753	18.6756	9.5131	0.836927	0.0460694	0	0.0307129	1400.04	1544.36	1529.82	0.311498	0.912202	0.320533	0.320533	0.521132	0.579493	Harzburgite	8.5	38.12	0.5
			25.575	48.8023	0.426683	11.3841	0	0.423086	10.0661	0.186927	18.0763	9.70214	0.854008	0.0470096	0	0.0313397	1390.31	1531.53	1514.53	0.312812	0.910959	0.315297	0.315297	0.522944	0.598366	Harzburgite	8.51	38.12	1
samp. 5727A7	low-Ti	Wrangellia	30.1836	45.0898	0.424175	13.5236	0	0.21001	10.6787	0.165601	19.2269	9.66124	0.892544	0.0750037	0	0.0525026	1414.84	1555.87	1543.84	0.292067	0.916575	0.157684	0.27031	0.171445	0.157684	Garnet Peridotite	8.02	38.12	0.5
			28.6504	45.1545	0.430353	13.7236	0	0.426343	10.4616	0.16646	18.7988	9.80289	0.905979	0.0761327	0	0.0532929	1408.08	1546.96	1532.96	0.292841	0.916234	0.162456	0.265965	0.171717	0.162456	Garnet Peridotite	8.02	38.12	1
samp. 5731A4	low-Ti	Wrangellia	20.7161	47.6418	0.398561	13.1309	0	0.197933	9.45646	0.189478	16.9231	9.95044	1.54223	0.519575	0	0.0494833	1379.6	1505.82	1484.94	0.303687	0.913058	0.254666	0.273078	0.254666	0.280018	Spinel Peridotite	8.2	38.12	0.5
			18.8963	47.7623	0.4055	13.364	0	0.402995	9.24825	0.190316	16.3522	10.125	1.57	0.52893	0	0.0503743	1369.94	1492.51	1470.21	0.304244	0.91196	0.252668	0.267919	0.252668	0.288852	Spinel Peridotite	8.23	38.12	1
samp. 5802A2	low-Ti	Wrangellia	24.2524	48.3306	0.384232	12.2024	0	0.190592	9.67993	0.189127	17.2687	10.1265	1.49297	0.0873546	0	0.047648	1381.33	1513.68	1493.84	0.307502	0.911811	0.28599	0.28599	0.349181	0.40456	Harzburgite	8.37	38.12	0.5
			22.4754	48.4627	0.390768	12.4139	0	0.38789	9.47158	0.190004	16.7265	10.3001	1.51924	0.0888915	0	0.0484863	1372.19	1501.28	1479.88	0.308225	0.910799	0.281649	0.281649	0.347519	0.417329	Harzburgite	8.38	38.12	1
samp. 5802A3	low-Ti	Wrangellia	20.7206	46.9578	0.431931	13.8556	0	0.214501	9.49974	0.179134	17.1241	10.2109	0.990003	0.486751	0	0.0495001	1376.39	1510.41	1490.12	0.301842	0.914111	0.245218	0.269209	0.245218	0.272822	Spinel Peridotite	8.13	38.12	0.5
			18.701	47.0779	0.440294	14.1291	0	0.437593	9.27759	0.180027	16.4906	10.4101	1.00983	0.4965	0	0.0504915	1365.53	1495.78	1473.79	0.302696	0.912778	0.242519	0.263307	0.242519	0.281927	Spinel Peridotite	8.17	38.12	1
samp. 5802A5	low-Ti	Wrangellia	27.5074	45.6105	0.722016	12.4979	0	0.357776	10.7098	0.193501	19.3699	9.42293	0.946376	0.0923294	0	0.0769411	1418.26	1558.82	1547.46	0.295043	0.916141	0.229644	0.280298	0.229644	0.227252	Spinel Peridotite	8.26	38.12	0.5
			24.697	45.7421	0.741476	12.8399	0	0.735495	10.3551	0.195284	18.5653	9.67859	0.972752	0.0949026	0	0.0790855	1405.57	1542.02	1527.02	0.2965	0.915084	0.229719	0.273122	0.229719	0.239421	Spinel Peridotite	8.26	38.12	1
samp. 5808A2	high-Ti	Wrangellia	2.65785	48.7451	1.08925	11.0103	0	0.54415	9.64827	0.157161	17.1255	9.85277	1.37578	0.359344	0	0.0924028	1380.32	1510.44	1490.15	0.309815	0.910796	0.292599	0.292599	0.419574	0.504574	Harzburgite	8.42	38.12	0.5
			-0.971646	49.0085	1.12742	11.404	0	1.12778	9.16205	0.15838	15.9174	10.2007	1.42569	0.372381	0	0.0957551	1360.65	1482.09	1458.95	0.311362	0.908633	0.283907	0.283907	0.416373	0.543372	Harzburgite	8.43	38.12	1
samp. 5810A2	low-Ti	Wrangellia	26.3842	46.9234	0.422906	12.6157	0	0.209631	10.1976	0.194653	18.8427	9.54526	0.947221	0.0543487	0	0.0465846	1405.41	1547.88	1534.08	0.301962	0.916004	0.29103	0.29103	0.327148	0.353391	Harzburgite	8.02	38.12	0.5
			24.2531	47.0509	0.431555	12.8779	0	0.428128	9.99029	0.195933	18.2132	9.74182	0.967253	0.0554981	0	0.0475698	1395.15	1534.49	1518.03	0.303118	0.914668	0.286278	0.286278	0.326587	0.365358	Harzburgite	8.02	38.12	1
samp. 4720A2	high-Ti	Wrangellia	42.7145	47.0454	1.07723	9.14533	0	0.531119	10.5066	0.21124	20.3861	9.52389	1.42528	0.0672302	0	0.0806762	1439.15	1579.29	1573.13	0.300475	0.920055	0.307296	0.307296	0.326586	0.321062	Harzburgite	8.07	38.12	0.5
			34.0381	47.6156	1.17013	9.94667	0	1.15706	9.90858	0.217433	17.9198	10.3511	1.55251	0.0732315	0	0.0878778	1398.81	1528.13	1510.53	0.304143	0.913777	0.28463	0.28463	0.323255	0.364621	Harzburgite	8.32	38.12	1
samp. 4721A2	high-Ti	Wrangellia	59.0296	46.0693	1.02618	7.98221	0	0.503287	11.5695	0.159242	24.382	7.02307	1.14306	0.0511817	0	0.0909897	1506.3	1653.7	1672.39	0.295629	0.927035	0.386309	0.384715	0.424284	0.386309	Garnet Peridotite	8.02	38.12	0.5
samp. 5614A1	low-Ti	Wrangellia	1.51512	49.3587	0.495753	15.3628	0	0.247752	8.04767	0.160379	13.5026	11.4011	1.37055	0.0105427	0	0.0421706	1300.29	1418.47	1395.86	0.311748	0.905578	0.235955	0.235955	0.279881	0.483303	Harzburgite	8.27	38.12	0.5
			0.0236157	49.4746	0.502784	15.5862	0	0.502781	7.79878	0.160497	12.9662	11.564	1.39067	0.0106975	0	0.0427898	1290.06	1402.68	1381.71	0.312178	0.904689	0.228654	0.228654	0.270066	0.498856	Harzburgite	8.25	38.12	1
samp. 93G171	low-Ti	Wrangellia	-2.38979	48.5822	0.475409	14.4966	0	0.237891	8.81898	0.192793	15.1737	10.7709	1.05499	0.113774	0	0.0827447	1334.24	1463.61	1439.63	0.310382	0.908131	0.263031	0.263031	0.328821	0.463575	Harzburgite	8.35	38.12	0.5
			-3.79578	48.6798	0.481855	14.6976	0	0.482458	8.60368	0.19319	14.6742	10.9181	1.0698	0.11537	0	0.0839057	1325.43	1450.69	1426.59	0.311064	0.907181	0.258485	0.258485	0.324117	0.47742	Harzburgite	8.35	38.12	1
samp. 5616A7	low-Ti	Wrangellia	24.0917	46.9297	0.603099	13.0797	0	0.299187	10.1904	0.153486	17.2735	9.64298	1.73774	0.0573783	0	0.0327876	1387.12	1513.79	1493.96	0.301378	0.90929	0.222298	0.263615	0.222298	0.245384	Spinel Peridotite	8.58	38.12	0.5
			24.116	46.9277	0.602739	13.0716	0	0.598002	9.84345	0.153559	17.339	9.63723	1.73666	0.0573426	0	0.0327672	1389.27	1515.26	1495.64	0.30146	0.912387	0.227259	0.263831	0.227259	0.253524	Spinel Peridotite	8.28	38.12	1
samp. 92-205B	low-Ti	Wrangellia	29.6425	46.3424	0.689122	11.2878	0	0.341222	10.297	0.203089	19.3953	9.69671	0.584951	1.04991	0	0.112491	1421.09	1559.34	1548.11	0.298628	0.918307	0.253851	0.301336	0.270141	0.253851	Garnet Peridotite	8.02	38.12	0.5
			27.2988	46.47	0.704532	11.5441	0	0.698223	9.93437	0.204685	18.7414	9.91501	0.598477	1.07419	0	0.115092	1411.01	1545.75	1531.5	0.29978	0.918135	0.274132	0.29603	0.274132	0.266008	Spinel Peridotite	8.02	38.12	1
5617A5(2)	high-Ti	Wrangellia	48.0984	46.0731	1.12564	8.69454	0	0.554034	11.2357	0.163917	22.9546	7.83111	1.16639	0.110159	0	0.0907191	1483.15	1628.06	1637.24	0.296056	0.924806	0.340088	0.340946	0.366991	0.340088	Garnet Peridotite	8.02	38.12	0.5
28-Dostal	high-Ti	Wrangellia	59.1405	46.0536	0.938389	8.20439	0	0.460213	11.4498	0.196605	24.4521	7.06308	1.0227	0.0909063	0	0.0681797	1505.78	1654.94	1674.11	0.295291	0.928007	0.38854	0.385923	0.426645	0.38854	Garnet Peridotite	8.02	38.12	0.5
15-Dostal	high-Ti	Wrangellia	50.4202	46.0557	0.933491	8.86548	0	0.459134	11.3624	0.185453	23.1149	7.57002	1.27706	0.109462	0	0.0668937	1487.59	1630.99	1641.21	0.29622	0.924469	0.32895	0.346108	0.360073	0.32895	Garnet Peridotite	8.02	38.12	0.5
samp. FL-14	low-Ti	Galapagos	18.1021	46.7252	1.10817	13.3236	0	0.550825	9.2335	0.182912	15.1564	10.3635	2.36431	0.796578	0	0.194907	1359.43	1463.17	1439.18	0.295989	0.908119	0.0496499	0.183552	0.0589784	0.0496499	Garnet Peridotite	8.02	38.12	0.5
			14.6071	46.9256	1.14531	13.7804	0	1.13984	8.61965	0.183973	14.0195	10.7137	2.44628	0.824195	0	0.201665	1339.35	1433.04	1409.45	0.295918	0.907398	0.0545322	0.144592	0.0545322	0.0549293	Spinel Peridotite	8.02	38.12	1
samp. FL-25	low-Ti	Galapagos	16.8462	45.9499	1.30485	13.296	0	0.648845	9.65753	0.189681	15.9471	10.5558	2.10021	0.221973	0	0.128061	1367.41	1482.81	1459.72	0.29483	0.908949	0.0457325	0.163887	0.0522507	0.0457325	Garnet Peridotite	8.02	38.12	0.5
			12.7496	46.15	1.35629	13.8318	0	1.35063	8.97211	0.191162	14.6225	10.9753	2.18588	0.231028	0	0.133286	1344.36	1449.33	1425.24	0.295471	0.907684	0.0458031	0.108072	0.0458031	0.0517511	Spinel Peridotite	8.02	38.12	1
samp. FL-26	low-Ti	Galapagos	17.6026	45.883	1.24387	13.3467	0	0.618367	9.74247	0.179044	16.3514	10.4243	1.94828	0.152474	0	0.11012	1372.9	1492.49	1470.19	0.295113	0.91022	0.0680671	0.185774	0.0722816	0.0680671	Garnet Peridotite	8.02	38.12	0.5
			13.5144	46.0803	1.29284	13.8834	0	1.28712	9.09533	0.180564	15.0415	10.8379	2.02765	0.158685	0	0.114606	1350.37	1460.23	1436.18	0.295999	0.908768	0.0648973	0.140298	0.0648973	0.0759044	Spinel Peridotite	8.02	38.12	1
samp. E-165	low-Ti	Galapagos	7.40108	48.8629	0.650791	16.68	0	0.324606	7.32799	0.122969	11.648	11.513	2.57803	0.159951	0	0.131724	1274.51	1360.37	1346.74	0.300279	0.904147	0.0807789	0.080537	0.0807789	0.210963	Spinel Peridotite	8.02	38.12	0.5
			5.18396	49.0317	0.664589	17.0435	0	0.663456	6.95334	0.122771	10.8295	11.7585	2.6346	0.16346	0	0.134614	1256.96	1330.97	1324.87	0.299591	0.902573	0.0647274	0.0397898	0.0647274	-0.140993	Spinel Peridotite	8.02	38.12	1
samp. JH-86	low-Ti	Galapagos	15.5571	45.9414	1.09367	13.8383	0	0.544064	9.65582	0.178752	16.262	10.3788	1.96899	0.0518156	0	0.0863593	1370.09	1490.37	1467.88	0.295443	0.910414	0.0765771	0.184457	0.0772971	0.0765771	Garnet Peridotite	8.02	38.12	0.5
			11.9196	46.1167	1.13196	14.3332	0	1.12754	9.09859	0.180057	15.0835	10.745	2.04032	0.0536925	0	0.0894876	1349.76	1461.31	1437.28	0.296266	0.90887	0.0700256	0.144729	0.0700256	0.0840263	Spinel Peridotite	8.02	38.12	1
samp. JL-74	low-Ti	Galapagos	27.2665	45.7226	1.4331	12.5535	0	0.71019	10.1056	0.189513	17.6286	9.69627	1.82179	0.0540362	0	0.084914	1396.08	1521.72	1503.07	0.295254	0.913304	0.12262	0.228085	0.122031	0.12262	Garnet Peridotite	8.02	38.12	0.5
			21.3958	46.0158	1.51506	13.2856	0	1.50443	9.30995	0.192412	15.8448	10.2552	1.9296	0.0572339	0	0.089939	1366.08	1480.32	1457.07	0.296938	0.910869	0.108798	0.184867	0.108798	0.137584	Spinel Peridotite	8.02	38.12	1
samp. JL-122	low-Ti	Galapagos	19.0804	45.9367	1.14062	13.8495	0	0.566772	9.64636	0.178239	16.1607	10.4111	2.02714	0.0248221	0	0.0579183	1368.37	1487.95	1465.26	0.29525	0.910014	0.069043	0.17439	0.0699764	0.069043	Garnet Peridotite	8.02	38.12	0.5
			15.0891	46.1349	1.1845	14.3938	0	1.17866	9.03701	0.179685	14.8828	10.8148	2.10782	0.02581	0	0.0602233	1346.05	1456.14	1432.04	0.296066	0.908371	0.0614617	0.126385	0.0614617	0.0759096	Spinel Peridotite	8.02	38.12	1
samp. JH-86	low-Ti	Galapagos	15.5571	45.9414	1.09367	13.8383	0	0.544064	9.65582	0.178752	16.262	10.3788	1.96899	0.0518156	0	0.0863593	1370.09	1490.37	1467.88	0.295443	0.910414	0.0765771	0.184457	0.0772971	0.0765771	Garnet Peridotite	8.02	38.12	0.5
			11.9196	46.1167	1.13196	14.3332	0	1.12754	9.09859	0.180057	15.0835	10.745	2.04032	0.0536925	0	0.0894876	1349.76	1461.31	1437.28	0.296266	0.90887	0.0700256	0.144729	0.0700256	0.0840263	Spinel Peridotite	8.02	38.12	1
samp. W95 62	low-Ti	Galapagos	4.27577	48.142	1.54067	16.4691	0	0.769246	7.1764	0.130484	11.0984	12.1893	2.06406	0.238896	0	0.181561	1255.66	1340.93	1332.07	0.299342	0.902021	0.0378904	-0.0338921	0.0378904	-0.194295	Spinel Peridotite	8.02	38.12	0.5
			0	48.4289	1.6039	17.1646	0	1.60389	6.32099	0.129574	9.46624	12.6918	2.1518	0.249051	0	0.189278	1218.72	1274.71	1288.21	0.298005	0.899841	0.0367067	-0.161345	0.00554657	-0.221617	Garnet Peridotite	8.02	38.12	1
samp. W95 78	high-Ti	Galapagos	17.626	47.0336	1.82767	14.9077	0	0.908549	8.31398	0.144215	13.5771	10.5195	2.24614	0.311262	0	0.210312	1319.72	1420.61	1397.82	0.297848	0.907192	0.075556	0.0945543	0.075556	0.15161	Spinel Peridotite	8.02	38.12	0.5
			10.4793	47.4825	1.95565	15.9797	0	1.94887	7.17248	0.14453	11.0863	11.2616	2.40902	0.333834	0	0.225563	1269.36	1340.49	1331.75	0.297014	0.90274	0.0312471	-0.0559486	0.0312471	-0.177518	Spinel Peridotite	8.02	38.12	1
samp. NSK97-220	high-Ti	Galapagos	25.1645	46.9407	1.93643	12.5824	0	0.960209	9.15552	0.165759	16.0961	9.92834	1.80379	0.241024	0	0.189709	1366.11	1486.41	1463.59	0.300386	0.912516	0.180555	0.218959	0.180555	0.255608	Spinel Peridotite	8.02	38.12	0.5
			16.2335	47.5078	2.10764	13.7213	0	2.09629	7.95644	0.168212	13.1895	10.8136	1.96899	0.263097	0	0.207083	1312.92	1409.34	1387.61	0.301866	0.907291	0.127996	0.137931	0.127996	0.303867	Spinel Peridotite	8.02	38.12	1
samp. NSK97-252	low-Ti	Galapagos	7.09293	46.8257	0.94291	15.6286	0	0.47036	8.48021	0.164638	13.7241	11.543	2.01184	0.111769	0	0.0968662	1315.35	1424.79	1401.69	0.297192	0.906586	0.0533022	0.083272	0.0533022	0.0816438	Spinel Peridotite	8.02	38.12	0.5
			4.17263	46.9858	0.969297	16.0771	0	0.967968	7.99086	0.164937	12.6908	11.8685	2.07011	0.115006	0	0.0996719	1295.35	1394.28	1374.43	0.297343	0.90493	0.0424693	0.0261096	0.0424693	0.0888854	Spinel Peridotite	8.02	38.12	1
samp. NSK97-254	low-Ti	Galapagos	7.18599	46.9564	0.91416	15.2719	0	0.456007	8.67736	0.16916	14.3554	10.7688	2.14975	0.176819	0	0.10423	1332.36	1442.2	1418.26	0.298169	0.908156	0.0841591	0.145832	0.0841591	0.116626	Spinel Peridotite	8.02	38.12	0.5
			4.37584	47.1124	0.93871	15.692	0	0.93736	8.21544	0.169645	13.3759	11.0602	2.20949	0.181733	0	0.107127	1314.37	1414.81	1392.52	0.298373	0.906815	0.0739976	0.10855	0.0739976	0.125949	Spinel Peridotite	8.02	38.12	1
samp. SG93-1	high-Ti	Galapagos	26.6089	46.1589	1.76296	11.8862	0	0.873825	9.80242	0.172932	17.0651	9.78186	1.98527	0.31427	0	0.196227	1389.61	1509.07	1488.6	0.296618	0.91276	0.130716	0.221968	0.123745	0.130716	Garnet Peridotite	8.02	38.12	0.5
			19.015	46.5761	1.89457	12.7926	0	1.88238	8.78181	0.175886	14.6898	10.5182	2.1387	0.338558	0	0.211393	1348.51	1451.1	1427	0.297995	0.909129	0.10006	0.153872	0.10006	0.151784	Spinel Peridotite	8.02	38.12	1
samp. SG93-5	high-Ti	Galapagos	16.532	46.9044	1.73811	12.5521	0	0.864347	9.23758	0.172973	15.9881	10.0002	2.07613	0.288116	0	0.177954	1367.88	1483.8	1460.79	0.299176	0.911611	0.145145	0.209302	0.145145	0.189034	Spinel Peridotite	8.02	38.12	0.5
			10.0156	47.2895	1.84879	13.3699	0	1.84267	8.30131	0.17481	13.8212	10.6421	2.21301	0.307112	0	0.189687	1329.53	1427.52	1404.24	0.300003	0.908183	0.115788	0.146105	0.115788	0.219414	Spinel Peridotite	8.02	38.12	1
samp. 07DSG74	low-Ti	Galapagos	18.849	46.0339	1.05216	14.0938	0	0.522852	9.57145	0.173063	16.2193	10.2663	1.92546	0.0622501	0	0.0794962	1368.58	1489.35	1466.77	0.296053	0.910722	0.0910936	0.191388	0.0910936	0.0962666	Spinel Peridotite	8.02	38.12	0.5
			15.083	46.2237	1.09032	14.616	0	1.08494	9.01214	0.174402	15.0121	10.6416	1.99771	0.0645859	0	0.0824791	1347.57	1459.48	1435.42	0.296909	0.909082	0.0821855	0.153892	0.0821855	0.10478	Spinel Peridotite	8.02	38.12	1
samp. PJT01	low-Ti	Galapagos	21.9685	46.0308	1.06025	13.8398	0	0.526336	9.69686	0.16904	16.6722	9.83118	1.97893	0.0947544	0	0.0998647	1379.13	1500.02	1478.48	0.296346	0.911821	0.112194	0.211136	0.107941	0.112194	Garnet Peridotite	8.02	38.12	0.5
			17.8485	46.2423	1.10242	14.4019	0	1.09599	9.12318	0.170616	15.3753	10.2254	2.06037	0.0986539	0	0.103974	1356.92	1468.71	1444.87	0.297295	0.909944	0.0985964	0.177565	0.0985964	0.121815	Spinel Peridotite	8.02	38.12	1
samp. PJT02	low-Ti	Galapagos	18.8989	45.7524	1.09168	14.2013	0	0.542487	9.62935	0.170426	16.0037	10.3703	2.01242	0.0864805	0	0.139548	1366.49	1484.18	1461.19	0.294639	0.909534	0.0564715	0.167012	0.0602346	0.0564715	Garnet Peridotite	8.02	38.12	0.5
			15.3006	45.9234	1.12937	14.7022	0	1.12372	9.04554	0.171671	14.8546	10.7312	2.08429	0.0895692	0	0.144532	1346.52	1455.41	1431.31	0.295357	0.908385	0.053963	0.123179	0.053963	0.0619994	Spinel Peridotite	8.02	38.12	1
samp. 07DSG79B	low-Ti	Galapagos	20.6813	46.0638	1.17109	13.7313	0	0.581603	9.62085	0.171603	16.3684	10.2162	1.93611	0.0597056	0	0.0793652	1371.72	1492.9	1470.63	0.296182	0.911009	0.0964744	0.195452	0.0964744	0.103219	Spinel Peridotite	8.02	38.12	0.5
			16.3724	46.2849	1.21976	14.314	0	1.21322	8.98694	0.17318	14.9994	10.6442	2.01935	0.0622725	0	0.0827774	1347.96	1459.15	1435.08	0.297163	0.909215	0.0855589	0.153374	0.0855589	0.113513	Spinel Peridotite	8.02	38.12	1
samp. 07DSG71	low-Ti	Galapagos	19.8629	45.4968	1.1692	13.9934	0	0.580822	9.80748	0.168356	16.1768	10.5608	1.9109	0.0522439	0	0.0831436	1368.33	1488.34	1465.67	0.293528	0.909222	0.0403108	0.158583	0.0473838	0.0403108	Garnet Peridotite	8.02	38.12	0.5
			16.0871	45.6684	1.21164	14.5122	0	1.20526	9.18007	0.169694	14.9823	10.9472	1.98265	0.0542056	0	0.0862657	1347.55	1458.71	1434.64	0.294379	0.908102	0.0419191	0.107753	0.0419191	0.0447452	Spinel Peridotite	8.02	38.12	1
samp. 07DSG73	low-Ti	Galapagos	20.9268	45.7168	1.16257	13.9607	0	0.577326	9.7438	0.170098	16.498	10.1238	1.89399	0.0565001	0	0.0963993	1374.51	1495.95	1473.98	0.294933	0.910971	0.0833344	0.190623	0.0832937	0.0833344	Garnet Peridotite	8.02	38.12	0.5
			16.7091	45.9189	1.20988	14.5408	0	1.20326	9.11876	0.171669	15.1645	10.5391	1.97372	0.0588788	0	0.100458	1351.48	1463.38	1439.39	0.295952	0.909229	0.074266	0.147689	0.074266	0.091418	Spinel Peridotite	8.02	38.12	1
samp. 07DSG74	low-Ti	Galapagos	18.849	46.0339	1.05216	14.0938	0	0.522852	9.57145	0.173063	16.2193	10.2663	1.92546	0.0622501	0	0.0794962	1368.58	1489.35	1466.77	0.296053	0.910722	0.0910936	0.191388	0.0910936	0.0962666	Spinel Peridotite	8.02	38.12	0.5
			15.083	46.2237	1.09032	14.616	0	1.08494	9.01214	0.174402	15.0121	10.6416	1.99771	0.0645859	0	0.0824791	1347.57	1459.48	1435.42	0.296909	0.909082	0.0821855	0.153892	0.0821855	0.10478	Spinel Peridotite	8.02	38.12	1
samp. PJT02	low-Ti	Galapagos	18.8989	45.7524	1.09168	14.2013	0	0.542487	9.62935	0.170426	16.0037	10.3703	2.01242	0.0864805	0	0.139548	1366.49	1484.18	1461.19	0.294639	0.909534	0.0564715	0.167012	0.0602346	0.0564715	Garnet Peridotite	8.02	38.12	0.5
			15.3006	45.9234	1.12937	14.7022	0	1.12372	9.04554	0.171671	14.8546	10.7312	2.08429	0.0895692	0	0.144532	1346.52	1455.41	1431.31	0.295357	0.908385	0.053963	0.123179	0.053963	0.0619994	Spinel Peridotite	8.02	38.12	1
samp. 08DSG02	low-Ti	Galapagos	20.7891	46.4878	1.00935	13.7974	0	0.501258	9.50121	0.167094	16.4629	10.0038	1.93068	0.0640343	0	0.0744145	1372.98	1495.13	1473.07	0.298214	0.911946	0.134769	0.218453	0.134769	0.154624	Spinel Peridotite	8.02	38.12	0.5
			16.9015	46.7036	1.04721	14.3259	0	1.04142	8.95422	0.168496	15.2276	10.3821	2.0056	0.0665191	0	0.0773021	1351.65	1464.98	1441.03	0.299141	0.910175	0.123986	0.189656	0.123986	0.167524	Spinel Peridotite	8.02	38.12	1
samp. 08DSG19	low-Ti	Galapagos	21.2363	45.8637	1.2369	13.7838	0	0.614175	9.7291	0.162914	16.7334	9.70724	1.96042	0.102106	0	0.106228	1380.67	1501.44	1480.05	0.295816	0.912032	0.111077	0.207352	0.105609	0.111077	Garnet Peridotite	8.02	38.12	0.5
			16.4749	46.0995	1.29398	14.4333	0	1.287	9.06579	0.164634	15.2248	10.1588	2.05403	0.106982	0	0.1113	1354.86	1464.91	1440.96	0.296918	0.909782	0.0939709	0.165788	0.0939709	0.122344	Spinel Peridotite	8.02	38.12	1
samp. 08DSG38	low-Ti	Galapagos	20.9046	45.7819	1.03922	13.6695	0	0.516082	9.91555	0.170609	16.9126	9.90336	1.94071	0.0697435	0	0.0805976	1383.5	1505.58	1484.67	0.295299	0.911466	0.0899582	0.210636	0.0941186	0.0899582	Garnet Peridotite	8.02	38.12	0.5
			17.3207	45.9539	1.07498	14.1493	0	1.0689	9.37067	0.172081	15.7979	10.2468	2.00978	0.0722257	0	0.0834661	1364.85	1479.18	1455.86	0.296236	0.910297	0.0884606	0.181792	0.0884606	0.0978196	Spinel Peridotite	8.02	38.12	1
samp. 08DSG42	low-Ti	Galapagos	18.76	46.1021	0.953222	13.9464	0	0.473703	9.72547	0.170954	16.8781	9.73447	1.88256	0.0603366	0	0.0727209	1381.34	1504.78	1483.78	0.296974	0.912393	0.128342	0.223484	0.128342	0.137309	Spinel Peridotite	8.02	38.12	0.5
			15.3341	46.2745	0.98457	14.4143	0	0.979634	9.23685	0.172323	15.7965	10.0571	1.9466	0.0623891	0	0.0751946	1363.24	1479.14	1455.82	0.297931	0.910995	0.121433	0.200792	0.121433	0.14784	Spinel Peridotite	8.02	38.12	1
samp. 08DSG43	low-Ti	Galapagos	20.3863	45.7255	1.02086	13.8703	0	0.507047	9.892	0.170077	16.95	9.87288	1.8569	0.0605666	0	0.0737864	1383.06	1506.44	1485.64	0.295246	0.911875	0.0980972	0.212851	0.100093	0.0980972	Garnet Peridotite	8.02	38.12	0.5
			16.7698	45.897	1.05641	14.3632	0	1.05063	9.36045	0.171535	15.8184	10.2194	1.9238	0.0627488	0	0.0764448	1364.01	1479.68	1456.39	0.296248	0.91046	0.0938172	0.184285	0.0938172	0.106298	Spinel Peridotite	8.02	38.12	1
samp. 15-146-1	low-Ti	Caribbean	30.5812	47.1816	0.822585	11.094	0	0.407186	10.1212	0.170882	18.7107	9.98258	1.42325	0.0228329	0	0.0631709	1407.99	1545.1	1530.72	0.301758	0.916094	0.2848	0.2848	0.286993	0.305431	Harzburgite	8.22	38.12	0.5
			26.0254	47.4743	0.858988	11.5936	0	0.851655	9.68253	0.173207	17.3598	10.4276	1.48841	0.0238782	0	0.0660629	1385.57	1515.73	1496.18	0.303687	0.913211	0.272411	0.272411	0.282147	0.329438	Harzburgite	8.29	38.12	1
samp. 96VD126*	low-Ti	Caribbean	29.3164	46.2094	1.17072	8.37585	0	0.579795	11.2392	0.174367	20.9384	9.50328	1.61569	0.077306	0	0.115959	1454.52	1590.11	1587.01	0.296308	0.918068	0.195948	0.305311	0.225751	0.195948	Garnet Peridotite	8.02	38.12	0.5
			25.3802	46.4145	1.21503	8.69686	0	1.20497	10.6772	0.176885	19.8699	9.86497	1.67892	0.0803313	0	0.120497	1438.99	1568.98	1560.11	0.298072	0.917538	0.216065	0.294352	0.234857	0.216065	Garnet Peridotite	8.02	38.12	1
samp. GOR501	low-Ti	Caribbean	-3.63022	45.3731	0.639969	10.6106	0	0.320359	11.3014	0.195169	21.3069	9.34924	0.850789	0.0210071	0	0.0315107	1451.46	1597.22	1596.24	0.291877	0.920088	0.213804	0.303294	0.239705	0.213804	Garnet Peridotite	8.02	38.12	0.5
			-5.07962	45.4201	0.648813	10.759	0	0.649876	11.0652	0.19616	20.8655	9.47912	0.86295	0.0213074	0	0.0319611	1445.56	1588.69	1585.18	0.292813	0.919892	0.223368	0.299654	0.244987	0.223368	Garnet Peridotite	8.02	38.12	1
samp. GOR502	low-Ti	Caribbean	17.1472	45.7275	0.635393	11.1978	0	0.315929	10.9027	0.193544	20.123	9.76009	1.07587	0.0341544	0	0.0341544	1432.3	1574.06	1566.5	0.294367	0.917862	0.194526	0.288873	0.213635	0.194526	Garnet Peridotite	8.02	38.12	0.5
			15.3593	45.8047	0.646189	11.3907	0	0.64296	10.6223	0.194707	19.6072	9.92692	1.09477	0.0347546	0	0.0347546	1424.74	1563.67	1553.47	0.295343	0.917616	0.203796	0.284399	0.216909	0.203796	Garnet Peridotite	8.02	38.12	1
samp. GOR519	low-Ti	Caribbean	11.536	46.7365	0.434636	11.3865	0	0.216503	10.3114	0.186427	19.4323	9.60883	1.12762	0.532237	0	0.0270629	1422.66	1560.1	1549.04	0.29993	0.918018	0.253971	0.298049	0.267208	0.253971	Garnet Peridotite	8.02	38.12	0.5
			10.2984	46.8004	0.439739	11.5222	0	0.438264	10.1225	0.187141	19.0601	9.72235	1.14131	0.538699	0	0.0273915	1417.18	1552.42	1539.6	0.300544	0.917801	0.261546	0.29512	0.269907	0.261546	Garnet Peridotite	8.02	38.12	1
samp. GOR520	low-Ti	Caribbean	32.42	46.5137	0.407464	10.9214	0	0.201588	10.6382	0.182566	20.2198	9.61785	1.23885	0.0293219	0	0.0293219	1434.12	1575.99	1568.94	0.298253	0.919076	0.25433	0.300083	0.269378	0.25433	Garnet Peridotite	8.02	38.12	0.5
			30.8994	46.5991	0.413356	11.0814	0	0.409201	10.4302	0.183571	19.8086	9.75777	1.25736	0.02976	0	0.02976	1427.87	1567.75	1558.57	0.299018	0.918833	0.262131	0.2964	0.271692	0.262131	Garnet Peridotite	8.02	38.12	1
samp. GOR512	low-Ti	Caribbean	-15.3039	46.5168	0.351913	11.4654	0	0.176828	10.4968	0.193365	20.278	9.63674	0.778042	0.0825196	0	0.023577	1429.36	1577.15	1570.41	0.298428	0.920263	0.304317	0.304317	0.318593	0.314362	Harzburgite	8.08	38.12	0.5
			-17.0917	46.6049	0.35802	11.6672	0	0.360002	10.3964	0.194504	19.714	9.80497	0.792005	0.0840005	0	0.0240001	1420.64	1565.83	1556.17	0.299486	0.918637	0.300014	0.300014	0.320137	0.323484	Harzburgite	8.16	38.12	1
samp. GOR513	low-Ti	Caribbean	-11.9262	46.466	0.374758	11.3473	0	0.188103	10.4377	0.190665	20.3123	9.86244	0.752411	0.0570009	0	0.0114002	1428.99	1577.83	1571.28	0.297717	0.920951	0.302511	0.302511	0.306052	0.300071	Harzburgite	8.02	38.12	0.5
samp. GOR515	low-Ti	Caribbean	-24.0119	45.9509	0.344855	11.1422	0	0.173765	10.7979	0.1906	20.9923	9.87973	0.476245	0.025743	0	0.025743	1438.64	1591.15	1588.36	0.294129	0.921755	0.284503	0.307982	0.29968	0.284503	Garnet Peridotite	8.02	38.12	0.5
samp. GOR517	low-Ti	Caribbean	-24.5516	46.1072	0.41074	10.9253	0	0.206998	10.822	0.202676	21.535	9.29845	0.426934	0.0388122	0	0.0258748	1447.38	1601.58	1601.95	0.295176	0.923163	0.319493	0.319493	0.354325	0.342359	Harzburgite	8.02	38.12	0.5
samp. CBU6	low-Ti	Caribbean	31.8906	46.7552	0.930035	10.9122	0	0.460195	10.2738	0.150086	19.0933	9.53436	1.70088	0.125173	0	0.0647954	1420.36	1553.11	1540.45	0.299515	0.917076	0.231404	0.281785	0.234113	0.231404	Garnet Peridotite	8.02	38.12	0.5
			27.8306	46.9988	0.966524	11.3474	0	0.957735	9.76851	0.152032	17.9302	9.91113	1.76989	0.130252	0	0.0674245	1401.86	1528.35	1510.8	0.301011	0.915737	0.232756	0.270213	0.232756	0.24981	Spinel Peridotite	8.02	38.12	1
samp. CBU8	low-Ti	Caribbean	26.7022	46.5758	0.907312	11.7547	0	0.449712	10.0297	0.188127	17.91	10.2525	1.63602	0.224856	0	0.0713336	1398.39	1527.91	1510.28	0.298436	0.914264	0.168722	0.260641	0.171962	0.168722	Garnet Peridotite	8.02	38.12	0.5
			23.0969	46.7826	0.938811	12.1703	0	0.93172	9.53997	0.190031	16.8339	10.6111	1.69477	0.23293	0	0.073895	1380.6	1503.77	1482.65	0.299628	0.913012	0.168323	0.24578	0.168323	0.181706	Spinel Peridotite	8.02	38.12	1
samp. AMA3	low-Ti	Caribbean	18.2488	49.136	0.747629	11.6666	0	0.371564	9.48377	0.174246	16.685	10.3772	1.22447	0.0675571	0	0.0658682	1366.28	1500.32	1478.81	0.312385	0.909396	0.291314	0.291314	0.444064	0.55836	Harzburgite	8.44	38.12	0.5
			15.2231	49.3821	0.769375	12.0129	0	0.765497	9.08612	0.175423	15.7283	10.6814	1.26133	0.0695907	0	0.0678509	1349.89	1477.47	1454.05	0.31384	0.907662	0.284246	0.284246	0.437794	0.590091	Harzburgite	8.44	38.12	1
samp. AMA4	low-Ti	Caribbean	23.9011	48.3606	0.739431	11.478	0	0.366812	9.71296	0.170005	17.345	10.2316	1.29182	0.239225	0	0.0645909	1381.78	1515.4	1495.8	0.307939	0.911786	0.289294	0.289294	0.374886	0.437585	Harzburgite	8.38	38.12	0.5
			20.5165	48.6147	0.763575	11.86	0	0.75841	9.30978	0.171461	16.3042	10.5683	1.33546	0.247308	0	0.0667731	1364.12	1491.38	1468.97	0.309381	0.909812	0.281045	0.281045	0.371087	0.464825	Harzburgite	8.4	38.12	1
samp. AMA6	low-Ti	Caribbean	23.2764	48.5447	0.800086	11.5506	0	0.396994	9.62983	0.176277	17.1286	9.72386	1.72432	0.256642	0	0.0681707	1383.69	1510.51	1490.23	0.307786	0.911498	0.28614	0.28614	0.361341	0.425388	Harzburgite	8.38	38.12	0.5
			19.723	48.8176	0.827515	11.9544	0	0.822149	9.19076	0.177809	16.0281	10.0598	1.78548	0.265745	0	0.0705885	1365.22	1484.77	1461.82	0.308915	0.909591	0.27718	0.27718	0.356573	0.453742	Harzburgite	8.39	38.12	1
samp. AMA9	low-Ti	Caribbean	23.9105	48.5937	0.795135	11.469	0	0.394444	9.62075	0.179556	17.0989	10.305	1.44231	0.0318743	0	0.0693265	1376.86	1509.84	1489.47	0.308834	0.911168	0.2856	0.2856	0.382281	0.465795	Harzburgite	8.38	38.12	0.5
			20.3318	48.8717	0.822604	11.8731	0	0.817086	9.17803	0.181124	15.9938	10.6638	1.49387	0.0330136	0	0.0718046	1357.95	1483.94	1460.94	0.31032	0.909154	0.276433	0.276433	0.375358	0.497345	Harzburgite	8.39	38.12	1
samp. FLO1	low-Ti	Caribbean	24.3152	48.7534	0.792793	11.3141	0	0.39325	9.55155	0.173393	16.958	9.68337	2.15295	0.158889	0	0.0683223	1384.61	1506.62	1485.84	0.307019	0.91155	0.281338	0.281338	0.335495	0.396592	Harzburgite	8.36	38.12	0.5
			20.7077	49.0394	0.820401	11.7161	0	0.814834	9.10601	0.174895	15.8392	10.0233	2.23051	0.164613	0	0.0707836	1365.79	1480.19	1456.93	0.30781	0.909672	0.271235	0.271235	0.32918	0.424359	Harzburgite	8.02	38.12	1
samp. YAN4	low-Ti	Caribbean	24.9582	48.9854	0.691716	11.2399	0	0.343011	9.68948	0.178606	17.2059	10.4943	1.09606	0.0236559	0	0.052043	1374.17	1512.26	1492.22	0.311831	0.91031	0.297077	0.297077	0.457463	0.554688	Harzburgite	8.44	38.12	0.5
samp. AN53	low-Ti	Caribbean	30.5068	47.2958	0.757519	10.8084	0	0.374994	10.2816	0.228237	19.0402	9.62988	1.48482	0.0378782	0	0.0606051	1415.48	1552	1539.1	0.302476	0.916044	0.293397	0.293397	0.315196	0.329542	Harzburgite	8.27	38.12	0.5
			26.5621	47.5526	0.786447	11.228	0	0.779612	9.88681	0.231049	17.8894	10.0002	1.54347	0.0393743	0	0.0629989	1396.84	1527.46	1509.75	0.304182	0.913801	0.283639	0.283639	0.314159	0.352307	Harzburgite	8.31	38.12	1
samp. AN54	low-Ti	Caribbean	28.7545	47.679	0.760805	10.9995	0	0.37683	10.1004	0.219314	18.4698	9.78701	1.49194	0.0538329	0	0.0615233	1404.72	1539.99	1524.58	0.304376	0.914581	0.291399	0.291399	0.335972	0.36635	Harzburgite	8.31	38.12	0.5
			24.9413	47.9417	0.788852	11.4121	0	0.7824	9.69403	0.221779	17.3401	10.1505	1.54883	0.0558857	0	0.0638694	1386.17	1515.29	1495.67	0.305994	0.912426	0.281955	0.281955	0.333828	0.391417	Harzburgite	8.34	38.12	1
samp. AN75	low-Ti	Caribbean	25.563	48.1921	0.733445	11.2103	0	0.363659	9.87012	0.191689	17.8003	9.72822	1.67843	0.167843	0	0.06394	1395.2	1525.51	1507.47	0.306368	0.912973	0.289759	0.289759	0.349529	0.392982	Harzburgite	8.35	38.12	0.5
			22.0311	48.4516	0.758451	11.5996	0	0.752969	9.47598	0.193521	16.7279	10.0624	1.73762	0.173762	0	0.0661951	1377.43	1501.32	1479.91	0.307639	0.910929	0.280985	0.280985	0.346669	0.418285	Harzburgite	8.38	38.12	1
samp. AN76	low-Ti	Caribbean	22.976	48.5177	0.624313	11.9057	0	0.309806	9.55119	0.164079	16.9278	10.1324	1.5449	0.280891	0	0.0413074	1377.04	1505.93	1485.06	0.307845	0.911199	0.28421	0.28421	0.349719	0.411729	Harzburgite	8.38	38.12	0.5
			20.1954	48.7299	0.641006	12.2304	0	0.63675	9.20753	0.16518	16.0651	10.4054	1.58763	0.28866	0	0.04245	1362.35	1485.66	1462.78	0.308812	0.909659	0.277144	0.277144	0.346115	0.43295	Harzburgite	8.39	38.12	1
samp. AN87	low-Ti	Caribbean	22.3708	48.6593	0.634655	11.8619	0	0.315001	9.47686	0.163889	16.7501	10.2068	1.60816	0.281843	0	0.0414474	1374.17	1501.83	1480.49	0.308127	0.910894	0.282981	0.282981	0.349518	0.415933	Harzburgite	8.38	38.12	0.5
			19.5586	48.8776	0.651815	12.1892	0	0.647623	9.12633	0.164967	15.872	10.485	1.65314	0.289726	0	0.0426068	1359.15	1480.99	1457.78	0.309042	0.909329	0.275667	0.275667	0.345345	0.437892	Harzburgite	8.39	38.12	1
samp. BN14	low-Ti	Caribbean	30.4455	47.4132	0.645494	10.9763	0	0.319555	10.0007	0.172585	18.7613	9.4856	1.82493	0.354205	0	0.0462007	1416.68	1546.17	1532.01	0.301973	0.917161	0.260867	0.289357	0.260867	0.257737	Spinel Peridotite	8.02	38.12	0.5
			26.3023	47.6869	0.671475	11.4258	0	0.665716	9.66714	0.174717	17.5201	9.87017	1.9009	0.368951	0	0.0481241	1396.36	1519.31	1500.29	0.303226	0.914176	0.258253	0.278556	0.258253	0.273845	Spinel Peridotite	8.17	38.12	1
samp. BN19	low-Ti	Caribbean	17.6281	49.4631	0.757998	12.6321	0	0.376796	8.77971	0.173979	15.0555	10.971	1.59282	0.137017	0	0.0599448	1337.71	1460.59	1436.55	0.31124	0.907567	0.266533	0.266533	0.351725	0.500324	Harzburgite	8.38	38.12	0.5
			14.6166	49.7194	0.77991	13.0057	0	0.776135	8.34371	0.174799	14.0663	11.2907	1.64047	0.141116	0	0.061738	1319.63	1434.33	1410.68	0.312049	0.905941	0.256464	0.256464	0.337608	0.530577	Harzburgite	8.36	38.12	1
samp. BUR5	low-Ti	Caribbean	21.9476	48.4436	0.708741	12.0192	0	0.351819	9.42341	0.163093	16.6519	10.4998	1.59767	0.0910591	0	0.0496686	1370.15	1499.55	1477.95	0.307218	0.911125	0.27432	0.27432	0.321	0.395388	Harzburgite	8.34	38.12	0.5
			18.8117	48.6802	0.730137	12.3895	0	0.725615	9.03185	0.164257	15.6664	10.8193	1.64757	0.0939031	0	0.0512199	1353.08	1475.95	1452.44	0.308296	0.909328	0.264847	0.264847	0.313708	0.419436	Harzburgite	8.02	38.12	1
samp. BUR11	low-Ti	Caribbean	26.6234	47.335	0.901167	11.4378	0	0.44669	9.95209	0.202279	17.7593	9.59391	2.22159	0.0790601	0	0.0711541	1401.48	1524.61	1506.42	0.301143	0.913499	0.211506	0.266468	0.211506	0.222132	Spinel Peridotite	8.16	38.12	0.5
			23.9895	47.5056	0.923778	11.73	0	0.916555	9.44998	0.203827	17.0005	9.83648	2.27922	0.0811111	0	0.073	1389.66	1507.59	1486.94	0.301827	0.913965	0.210775	0.257035	0.210775	0.23819	Spinel Peridotite	8.02	38.12	1
samp. BN10	low-Ti	Caribbean	22.8098	48.9831	0.710679	11.849	0	0.352672	9.37842	0.155432	16.4425	10.2363	1.3443	0.506188	0	0.0414908	1366.94	1494.65	1472.55	0.310306	0.909672	0.288679	0.288679	0.395478	0.477038	Harzburgite	8.43	38.12	0.5
			19.6455	49.2414	0.732349	12.2178	0	0.727598	8.97181	0.156516	15.4499	10.5509	1.38672	0.522158	0	0.0427999	1349.7	1470.58	1446.82	0.311396	0.907878	0.281143	0.281143	0.390728	0.50441	Harzburgite	8.44	38.12	1
samp. GOR-94-19	low-Ti	Caribbean	-1.42744	46.1996	0.643476	10.9716	0	0.321886	10.8082	0.182277	20.5864	9.29533	0.909456	0.0306558	0	0.051093	1437.58	1583.24	1578.17	0.297007	0.919566	0.303552	0.303552	0.307171	0.299977	Harzburgite	8.22	38.12	0.5
			-1.59184	46.1929	0.644311	10.986	0	0.644643	10.5222	0.182319	20.5275	9.30747	0.910686	0.0306973	0	0.0511621	1437.9	1582.08	1576.69	0.297328	0.921235	0.303151	0.303151	0.31351	0.309243	Harzburgite	8.02	38.12	1
samp. GOR-94-32	low-Ti	Caribbean	-11.4929	47.5544	0.392471	11.8915	0	0.19697	10.3154	0.177692	19.0233	9.70541	0.630305	0.0787881	0	0.0337663	1404.46	1551.65	1538.67	0.30549	0.914979	0.306832	0.306832	0.422779	0.460946	Harzburgite	8.35	38.12	0.5
			-12.7931	47.6295	0.397403	12.0434	0	0.399062	10.1736	0.178355	18.5979	9.82818	0.6385	0.0798125	0	0.0342053	1397.92	1542.72	1527.85	0.306409	0.914046	0.303805	0.303805	0.424729	0.47254	Harzburgite	8.37	38.12	1
samp. GOR-156	low-Ti	Caribbean	-5.51997	45.9707	0.464383	10.3477	0	0.232605	11.1234	0	22.349	8.86726	0.634378	0.010573	0	0	1463.79	1616.89	1622.22	0.294334	0.924059	0.321594	0.327495	0.343984	0.321594	Garnet Peridotite	8.02	38.12	0.5
			-6.87675	46.0244	0.47041	10.4834	0	0.471453	10.9675	0	21.9464	8.98284	0.64289	0.0107148	0	0	1458.34	1609.36	1612.21	0.295255	0.923582	0.323393	0.323393	0.348954	0.331141	Harzburgite	8.02	38.12	1
samp. GOR-139	low-Ti	Caribbean	-5.38019	45.6876	0.488436	10.836	0	0.244642	11.18	0	21.5257	9.23987	0.776471	0.0212732	0	0	1452.56	1601.4	1601.71	0.293419	0.921248	0.253393	0.309019	0.276059	0.253393	Garnet Peridotite	8.02	38.12	0.5
			-6.47268	45.7259	0.493542	10.9507	0	0.494575	11.0008	0	21.1912	9.33697	0.784869	0.0215033	0	0	1448.11	1594.99	1593.35	0.294159	0.921097	0.261404	0.306244	0.280284	0.261404	Garnet Peridotite	8.02	38.12	1
samp. GOR-142	low-Ti	Caribbean	-3.35144	46.2251	0.537868	10.8645	0	0.269225	10.794	0	21.3462	9.20719	0.735191	0.0207096	0	0	1447.08	1597.97	1597.22	0.296387	0.922452	0.312267	0.312267	0.330554	0.319593	Harzburgite	8.02	38.12	0.5
			-5.79545	46.3392	0.550681	11.1266	0	0.551718	10.6277	0	20.6019	9.42771	0.753307	0.0212199	0	0	1435.96	1583.54	1578.56	0.297887	0.920629	0.306128	0.306128	0.334161	0.333091	Harzburgite	8.09	38.12	1
samp. GOR-145	low-Ti	Caribbean	3.03279	45.975	0.516165	10.8064	0	0.257829	10.997	0	21.5453	9.05584	0.817269	0.0291882	0	0	1452.55	1601.77	1602.2	0.295158	0.92206	0.288216	0.312273	0.306194	0.288216	Garnet Peridotite	8.02	38.12	0.5
			1.73626	46.0271	0.522499	10.9406	0	0.522204	10.7984	0	21.1645	9.16755	0.827645	0.0295587	0	0	1447.4	1594.48	1592.68	0.296006	0.921888	0.297652	0.308974	0.310703	0.297652	Garnet Peridotite	8.02	38.12	1
samp. GOR-166	low-Ti	Caribbean	7.76771	46.006	0.492976	10.5006	0	0.245868	11.0543	0	21.8372	9.11167	0.75152	0	0	0	1456.39	1607.31	1609.49	0.294852	0.922724	0.298526	0.317981	0.318746	0.298526	Garnet Peridotite	8.02	38.12	0.5
			6.76828	46.0456	0.497611	10.6004	0	0.496517	10.8517	0	21.5517	9.19775	0.758829	0	0	0	1452.73	1601.89	1602.36	0.295554	0.922934	0.315286	0.315286	0.32358	0.307288	Harzburgite	8.02	38.12	1
samp. GOR-141	low-Ti	Caribbean	9.62013	45.8473	0.505068	10.822	0	0.251746	11.0698	0	21.4196	9.26982	0.814742	0	0	0	1450.46	1599.38	1599.06	0.294309	0.921367	0.265284	0.308636	0.285179	0.265284	Garnet Peridotite	8.02	38.12	0.5
			8.28032	45.9023	0.511483	10.9611	0	0.510107	10.8676	0	21.0338	9.38817	0.825446	0	0	0	1445.12	1591.96	1589.4	0.295159	0.921176	0.274168	0.305308	0.289324	0.274168	Garnet Peridotite	8.02	38.12	1
samp. GOR-149	low-Ti	Caribbean	8.6354	46.0588	0.533952	11.1253	0	0.266227	10.8368	0	20.6459	9.47731	0.982287	0.073442	0	0	1439.16	1584.4	1579.67	0.295985	0.919829	0.247703	0.299434	0.263771	0.247703	Garnet Peridotite	8.02	38.12	0.5
			7.1501	46.1237	0.541501	11.2847	0	0.540242	10.6202	0	20.2064	9.61206	0.996653	0.0745161	0	0	1432.87	1575.72	1568.61	0.296859	0.919503	0.256876	0.295891	0.267269	0.256876	Garnet Peridotite	8.02	38.12	1
samp. GOR-148	low-Ti	Caribbean	12.6086	46.0791	0.54762	10.9327	0	0.272689	10.8812	0	21.3782	9.0025	0.83566	0.0703714	0	0	1449.91	1598.58	1598.03	0.295974	0.92206	0.297392	0.310904	0.312177	0.297392	Garnet Peridotite	8.02	38.12	0.5
			8.90071	46.2585	0.567339	11.3315	0	0.565694	10.7176	0	20.2911	9.32846	0.866789	0.0729928	0	0	1433.12	1577.41	1570.74	0.298019	0.918846	0.301902	0.301902	0.314483	0.312618	Harzburgite	8.24	38.12	1
samp. GOR-146	low-Ti	Caribbean	12.6868	45.9761	0.540593	10.9684	0	0.269184	10.9456	0	21.0048	9.29808	0.935524	0.0617799	0	0	1445.05	1591.4	1588.68	0.295465	0.920479	0.256953	0.303917	0.274779	0.256953	Garnet Peridotite	8.02	38.12	0.5
			11.1523	46.0425	0.548427	11.1293	0	0.546435	10.7237	0	20.5639	9.43354	0.949543	0.0627057	0	0	1438.85	1582.79	1577.61	0.296381	0.920229	0.266422	0.300194	0.278804	0.266422	Garnet Peridotite	8.02	38.12	1
samp. GOR-157	low-Ti	Caribbean	17.3316	46.0898	0.501274	10.8455	0	0.249227	10.9297	0	21.1201	9.25067	0.929319	0.0844836	0	0	1446.94	1593.62	1591.57	0.296015	0.920849	0.26891	0.307763	0.287339	0.26891	Garnet Peridotite	8.02	38.12	0.5
			15.7714	46.1621	0.508711	11.0083	0	0.5061	10.7187	0	20.6781	9.38864	0.943576	0.0857796	0	0	1440.61	1585.03	1580.48	0.296932	0.920503	0.278215	0.303929	0.291151	0.278215	Garnet Peridotite	8.02	38.12	1
samp. GOR-167	low-Ti	Caribbean	23.3709	45.8409	0.538332	11.1221	0	0.267121	10.9636	0	20.6924	9.62665	0.924957	0.0239213	0	0	1439.34	1585.31	1580.84	0.294599	0.91947	0.228454	0.29731	0.246982	0.228454	Garnet Peridotite	8.02	38.12	0.5
			21.6536	45.9198	0.547126	11.3061	0	0.543266	10.7207	0	20.2133	9.7848	0.940579	0.0243253	0	0	1432.27	1575.86	1568.78	0.295574	0.919149	0.237371	0.293225	0.250125	0.237371	Garnet Peridotite	8.02	38.12	1
samp. GOR-94-32	low-Ti	Caribbean	9.66866	45.7803	0.618883	11.436	0	0.308471	10.7869	0.187312	19.7366	9.94206	1.1326	0.0230202	0	0.0478821	1425.77	1566.29	1556.75	0.294713	0.917112	0.182112	0.283279	0.199614	0.182112	Garnet Peridotite	8.02	38.12	0.5
			8.02061	45.8487	0.628562	11.6175	0	0.626923	10.5262	0.188286	19.2424	10.0985	1.15092	0.0233926	0	0.0486567	1418.52	1556.19	1544.23	0.295607	0.916817	0.190731	0.278908	0.202464	0.190731	Garnet Peridotite	8.02	38.12	1
samp. GOR-94-19	low-Ti	Caribbean	0.580663	46.0976	0.631102	10.7581	0	0.315492	10.7459	0.180944	21.1837	9.11566	0.89139	0.0330516	0	0.0470734	1447.36	1594.85	1593.16	0.296013	0.922292	0.308554	0.308554	0.308641	0.295528	Harzburgite	8.02	38.12	0.5
			-1.59183	46.1929	0.644311	10.986	0	0.644643	10.5222	0.182319	20.5275	9.30747	0.910686	0.033767	0	0.0480924	1437.91	1582.08	1576.69	0.297325	0.921236	0.303151	0.303151	0.313194	0.308809	Harzburgite	8.02	38.12	1
samp. 6	low-Ti	Caribbean	15.2524	46.1324	0.623064	10.9631	0	0.309989	10.7153	0.191841	20.5845	9.42321	0.97302	0.043054	0	0.0404708	1438.08	1583.2	1578.12	0.29639	0.920327	0.270609	0.300729	0.282328	0.270609	Garnet Peridotite	8.02	38.12	0.5
			13.6775	46.2041	0.632359	11.1288	0	0.629542	10.4423	0.192876	20.1326	9.56458	0.988032	0.0437182	0	0.0410951	1431.72	1574.25	1566.75	0.297338	0.920357	0.286686	0.296983	0.286686	0.281851	Spinel Peridotite	8.02	38.12	1
samp. 23B	low-Ti	Caribbean	13.1915	44.5984	0.595702	10.6511	0	0.296584	11.8804	0.183258	22.0538	8.85801	0.8145	0.0265598	0	0.0416103	1466.9	1611.38	1614.88	0.287746	0.919985	0.168704	0.30635	0.20213	0.168704	Garnet Peridotite	8.02	38.12	0.5
			11.6176	44.6456	0.604598	10.8119	0	0.602329	11.6464	0.184344	21.6177	8.99091	0.827079	0.02697	0	0.0422529	1460.99	1603.15	1604.01	0.288683	0.919738	0.175972	0.302472	0.206895	0.175972	Garnet Peridotite	8.02	38.12	1
samp. 38	low-Ti	Caribbean	12.5386	45.7451	0.568507	11.7007	0	0.283099	10.8131	0.203286	19.7762	9.58557	1.2651	0.0176937	0	0.0415801	1428.42	1567.09	1557.75	0.294957	0.917016	0.180453	0.283338	0.198383	0.180453	Garnet Peridotite	8.02	38.12	0.5
			10.9723	45.8111	0.576954	11.8771	0	0.574898	10.5694	0.20431	19.3126	9.72887	1.28454	0.0179656	0	0.0422191	1421.64	1557.64	1546.01	0.295771	0.916741	0.18816	0.279273	0.200895	0.18816	Garnet Peridotite	8.02	38.12	1
samp. 71	low-Ti	Caribbean	9.7883	46.0053	0.610173	11.1846	0	0.304119	10.7985	0.174906	20.1404	9.55647	1.2074	0.0181563	0	0	1433.25	1574.41	1566.94	0.295921	0.918252	0.215771	0.291203	0.231963	0.215771	Garnet Peridotite	8.02	38.12	0.5
			8.17448	46.0755	0.61952	11.3583	0	0.617874	10.5431	0.175823	19.6611	9.70374	1.22653	0.018444	0	0	1426.37	1564.76	1554.84	0.296807	0.918017	0.225333	0.287226	0.235401	0.225333	Garnet Peridotite	8.02	38.12	1
samp. 72	low-Ti	Caribbean	12.7588	45.7235	0.633231	11.2147	0	0.315306	10.9127	0.204017	20.2976	9.62434	1.05694	0.0177637	0	0	1434.8	1577.53	1570.9	0.294304	0.918466	0.204775	0.290918	0.223281	0.204775	Garnet Peridotite	8.02	38.12	0.5
			10.9801	45.798	0.643948	11.4071	0	0.64165	10.6458	0.205225	19.7765	9.78819	1.07544	0.0180746	0	0	1427.23	1567.1	1557.76	0.295299	0.918115	0.214325	0.28655	0.226681	0.214325	Garnet Peridotite	8.02	38.12	1
samp. 73	low-Ti	Caribbean	14.5404	45.8633	0.621983	11.3609	0	0.309525	10.8032	0.203181	20.1736	9.53961	1.09859	0.026157	0	0	1432.79	1575.07	1567.78	0.295219	0.91852	0.217821	0.290704	0.233077	0.217821	Garnet Peridotite	8.02	38.12	0.5
			12.8016	45.9392	0.632256	11.5512	0	0.629624	10.5347	0.204357	19.6666	9.69812	1.11736	0.0266038	0	0	1425.42	1564.87	1554.97	0.296182	0.918256	0.227599	0.286481	0.236303	0.227599	Garnet Peridotite	8.02	38.12	1
samp. 3P	low-Ti	Caribbean	-6.96786	45.6938	0.643228	11.3731	0	0.322339	10.8722	0.185003	19.8515	9.91995	1.11744	0.0214893	0	0	1427.62	1568.61	1559.65	0.294174	0.917099	0.175644	0.283527	0.194805	0.175644	Garnet Peridotite	8.02	38.12	0.5
			-8.36174	45.7428	0.651816	11.5272	0	0.653584	10.6278	0.18579	19.403	10.0532	1.13288	0.0217861	0	0	1421.32	1559.5	1548.3	0.294997	0.916871	0.184301	0.27974	0.198423	0.184301	Garnet Peridotite	8.02	38.12	1
samp. 5P	low-Ti	Caribbean	4.25442	45.9629	0.568554	11.5565	0	0.283885	10.6783	0.158506	19.781	9.92301	1.06818	0.0192464	0	0	1424.69	1567.19	1557.87	0.295544	0.917836	0.207977	0.285898	0.221365	0.207977	Garnet Peridotite	8.02	38.12	0.5
			2.81277	46.0227	0.576328	11.7169	0	0.575801	10.4468	0.159209	19.34	10.0595	1.08329	0.0195187	0	0	1418.29	1558.2	1546.7	0.296366	0.917579	0.216607	0.28222	0.224167	0.216607	Garnet Peridotite	8.02	38.12	1
samp. 72	low-Ti	Caribbean	12.7253	45.7331	0.633578	11.2119	0	0.315482	10.9176	0.204104	20.2525	9.65637	1.05753	0.0177736	0	0	1434.02	1576.64	1569.77	0.294357	0.918243	0.204092	0.290565	0.222435	0.204092	Garnet Peridotite	8.02	38.12	0.5
			11.0778	45.8014	0.643475	11.3895	0	0.641158	10.6472	0.205223	19.7713	9.80811	1.07462	0.0180608	0	0	1427.11	1567	1557.62	0.295293	0.918085	0.213537	0.286515	0.226061	0.213537	Garnet Peridotite	8.02	38.12	1
samp. 73	low-Ti	Caribbean	14.4892	45.8469	0.621571	11.336	0	0.309324	10.8205	0.202975	20.1791	9.55956	1.09788	0.0261401	0	0	1432.96	1575.18	1567.92	0.295112	0.918467	0.214963	0.290624	0.230894	0.214963	Garnet Peridotite	8.02	38.12	0.5
			12.7632	45.9223	0.63179	11.525	0	0.629168	10.5517	0.204136	19.6751	9.71768	1.11655	0.0265846	0	0	1425.61	1565.05	1555.19	0.296068	0.918196	0.224645	0.286413	0.234096	0.224645	Garnet Peridotite	8.02	38.12	1
samp. G-160	low-Ti	Caribbean	4.16969	45.4869	0.626233	11.4481	0	0.312694	11.0166	0.178166	19.7501	9.8149	1.2604	0.0577282	0	0.0481068	1429.13	1566.57	1557.09	0.293518	0.915864	0.139763	0.279939	0.163653	0.139763	Garnet Peridotite	8.02	38.12	0.5
			2.66584	45.5419	0.635141	11.6134	0	0.634591	10.7622	0.178995	19.292	9.95538	1.27894	0.0585776	0	0.0488147	1422.58	1557.22	1545.49	0.294314	0.91566	0.146896	0.27575	0.166897	0.146896	Garnet Peridotite	8.02	38.12	1
samp. G-159	low-Ti	Caribbean	1.9253	45.3784	0.631645	11.5243	0	0.315625	11.0509	0.179848	19.7785	9.86831	1.20332	0.0295899	0	0.0394532	1428.8	1567.14	1557.81	0.292867	0.915911	0.136062	0.27879	0.159948	0.136062	Garnet Peridotite	8.02	38.12	0.5
			0.452059	45.4295	0.640437	11.6872	0	0.640342	10.7981	0.180662	19.3266	10.0065	1.22065	0.030016	0	0.0400213	1422.38	1557.93	1546.37	0.293669	0.915718	0.143123	0.274641	0.163227	0.143123	Garnet Peridotite	8.02	38.12	1
samp. G-142	low-Ti	Caribbean	-7.78405	45.3892	0.628773	11.3493	0	0.315177	11.0728	0.186325	20.2436	9.71706	1.03248	0.0217364	0	0.0434728	1434.8	1576.46	1569.54	0.292643	0.917587	0.169977	0.286774	0.192604	0.169977	Garnet Peridotite	8.02	38.12	0.5
			-9.15835	45.4332	0.637044	11.5008	0	0.638934	10.8387	0.187136	19.8059	9.84566	1.04653	0.0220322	0	0.0440644	1428.74	1567.7	1558.5	0.293477	0.917335	0.178103	0.2832	0.196465	0.178103	Garnet Peridotite	8.02	38.12	1
samp. G-156	low-Ti	Caribbean	-10.8846	45.4217	0.601226	10.9556	0	0.301669	11.1996	0.188313	20.8918	9.42338	0.96087	0.0111729	0	0.0446916	1445.39	1589.2	1585.84	0.292554	0.919125	0.199668	0.297182	0.223929	0.199668	Garnet Peridotite	8.02	38.12	0.5
			-12.1531	45.4611	0.608528	11.0905	0	0.61092	10.9815	0.189096	20.4903	9.5385	0.972947	0.0113133	0	0.0452533	1440.01	1581.35	1575.76	0.293369	0.918933	0.208214	0.294032	0.228452	0.208214	Garnet Peridotite	8.02	38.12	1
samp. GTJ422	low-Ti	Caribbean	22.2185	48.9839	0.882636	11.7055	0	0.438084	9.32362	0.1712	16.3439	10.5935	1.33859	0.146028	0	0.0730141	1361.44	1492.32	1470	0.310716	0.909538	0.282165	0.282165	0.395245	0.508325	Harzburgite	8.4	38.12	0.5
			18.3775	49.2977	0.915378	12.149	0	0.909805	8.81693	0.172592	15.1315	10.9897	1.38998	0.151634	0	0.0758171	1340.09	1462.54	1438.53	0.312235	0.907366	0.272	0.272	0.383713	0.545647	Harzburgite	8.4	38.12	1
samp. NC93-20	low-Ti	Caribbean	25.0417	48.7398	0.777766	11.3147	0	0.385684	9.74399	0.188895	17.378	9.93633	1.43254	0.0472266	0	0.0550977	1382.59	1516.14	1496.64	0.309949	0.911152	0.293414	0.293414	0.421638	0.504748	Harzburgite	8.41	38.12	0.5
			21.478	49.0228	0.804521	11.7115	0	0.798822	9.31094	0.190618	16.2905	10.2808	1.48353	0.0489075	0	0.0570587	1364.26	1491.05	1468.62	0.311503	0.90917	0.285032	0.285032	0.416713	0.537465	Harzburgite	8.02	38.12	1
samp. COL547	low-Ti	Caribbean	38.0848	45.6979	0.870937	8.50559	0	0.430116	11.7576	0.199963	21.7753	8.81642	1.50893	0.32435	0	0.112817	1472.44	1606.14	1607.94	0.294505	0.918086	0.168829	0.322076	0.207196	0.168829	Garnet Peridotite	8.02	38.12	0.5
			31.8745	46.005	0.924044	9.03057	0	0.914488	11.4162	0.204685	20.0792	9.35697	1.6041	0.344807	0	0.119933	1446.55	1573.19	1565.4	0.297033	0.913445	0.181527	0.303692	0.212378	0.181527	Garnet Peridotite	8.36	38.12	1
samp. 15-146-42-1-30	low-Ti	Caribbean	22.0639	48.1639	0.784028	12.5737	0	0.389186	9.30765	0.196675	16.4043	10.2267	1.88239	0.0714832	0	0	1368.82	1493.74	1471.56	0.305155	0.911454	0.260857	0.260857	0.265473	0.332736	Harzburgite	8.29	38.12	0.5
			18.6983	48.4089	0.809438	12.9897	0	0.80447	8.86843	0.19812	15.3407	10.5608	1.9455	0.0738799	0	0	1350.37	1467.84	1443.98	0.306034	0.909714	0.247917	0.247917	0.255771	0.355002	Harzburgite	8.28	38.12	1
samp. GOR29	low-Ti	Caribbean	-21.9812	45.241	0.605447	11.1256	0	0.304868	11.2415	0.188537	20.2441	9.92283	1.06041	0.0126239	0	0.0530206	1435.83	1576.47	1569.56	0.291686	0.916692	0.138958	0.285256	0.165901	0.138958	Garnet Peridotite	8.02	38.12	0.5
samp. A12SP2	low-Ti	Caribbean	15.7431	49.0835	0.357526	12.8571	0	0.17784	9.01472	0.130939	15.5823	10.9761	1.7784	0.0416405	0	0	1349.2	1473.87	1450.26	0.308815	0.908904	0.265311	0.265311	0.307245	0.40335	Harzburgite	8.37	38.12	0.5
			14.5021	49.1822	0.361757	13.0125	0	0.360033	8.82267	0.131241	15.1802	11.107	1.80017	0.0421502	0	0	1342.13	1463.78	1439.8	0.309158	0.908409	0.261079	0.261079	0.30393	0.414244	Harzburgite	8.35	38.12	1
samp. B01SP3	low-Ti	Caribbean	20.656	47.6432	0.500588	12.3738	0	0.248605	9.68287	0.19894	17.4238	10.4142	1.49163	0.0223745	0	0	1383.31	1517.16	1497.82	0.303783	0.913469	0.273168	0.273168	0.271512	0.308541	Harzburgite	8.27	38.12	0.5
samp. D29SP2	low-Ti	Caribbean	20.1648	49.2536	0.359178	12.8834	0	0.178397	9.10058	0.172097	15.8056	10.8457	1.39399	0.00746779	0	0	1349.07	1479.37	1456.06	0.311789	0.908487	0.277792	0.277792	0.379594	0.499015	Harzburgite	8.4	38.12	0.5
			18.641	49.3804	0.364407	13.075	0	0.362168	8.89675	0.172629	15.3213	11.0048	1.41498	0.00758026	0	0	1340.46	1467.35	1443.47	0.312398	0.907613	0.273774	0.273774	0.375356	0.513032	Harzburgite	8.4	38.12	1
samp. A02SP4R	low-Ti	Caribbean	10.0602	51.6696	0.857318	13.2802	0	0.427222	7.65682	0.132143	12.5648	11.6685	1.63617	0.10726	0	0	1283.22	1390.36	1371.09	0.31874	0.901725	0.261277	0.261277	0.396296	0.753654	Harzburgite	8.39	38.12	0.5
			7.10141	51.9823	0.881652	13.6673	0	0.879558	7.1485	0.132114	11.5119	12.002	1.68426	0.110413	0	0	1261.71	1355.66	1343.11	0.318908	0.899994	0.25077	0.25077	0.355783	0.798482	Harzburgite	8.35	38.12	1
samp. A02SP4S	low-Ti	Caribbean	9.55633	51.686	0.920909	13.2274	0	0.458988	7.64172	0.102051	12.5271	11.598	1.73497	0.102813	0	0	1283.65	1389.18	1370.09	0.318062	0.901865	0.258962	0.258962	0.387296	0.749636	Harzburgite	8.38	38.12	0.5
			6.4369	52.0158	0.948518	13.6348	0	0.946476	7.09854	0.101995	11.4109	11.9482	1.78884	0.106005	0	0	1260.77	1352.13	1340.41	0.318092	0.90005	0.247187	0.247187	0.342516	-0.105811	Harzburgite	8.34	38.12	1
samp. D18SP2	low-Ti	Caribbean	22.4537	47.2121	0.63432	11.5609	0	0.314832	10.131	0.207104	18.6062	10.1167	1.0876	0.129204	0	0	1402.48	1542.89	1528.06	0.302374	0.91543	0.289273	0.289273	0.311647	0.333485	Harzburgite	8.28	38.12	0.5
samp. A08SP3	low-Ti	Caribbean	18.2295	48.9228	0.593199	12.5719	0	0.294825	9.19029	0.160098	16.0621	10.4956	1.67629	0.0328519	0	0	1358.41	1485.59	1462.7	0.309236	0.909685	0.272423	0.272423	0.340406	0.442493	Harzburgite	8.36	38.12	0.5
			15.7917	49.1156	0.607056	12.8718	0	0.603899	8.86772	0.160894	15.2798	10.7428	1.7168	0.0336458	0	0	1344.76	1466.3	1442.39	0.310029	0.908314	0.265151	0.265151	0.333543	0.463531	Harzburgite	8.36	38.12	1
samp. D33SP1	low-Ti	Caribbean	17.3809	48.5359	0.518411	12.7355	0	0.257729	9.2667	0.16135	16.253	10.615	1.63228	0.0240547	0	0	1361.52	1490.16	1467.65	0.307516	0.910429	0.268617	0.268617	0.306381	0.388345	Harzburgite	8.34	38.12	0.5
			15.2977	48.6914	0.528749	12.9948	0	0.526091	8.99234	0.162061	15.5857	10.8284	1.66595	0.0245509	0	0	1349.93	1473.95	1450.35	0.308229	0.909266	0.261951	0.261951	0.301278	0.404463	Harzburgite	8.34	38.12	1

## Sheet: Sheet1
Sample	Type	Location	SiO2 (wt%)	TiO2	Al2O3	Cr2O3	FeOT	MnO	MgO	CaO	Na2O	K2O	NiO	P2O5	Tp(oC)	T(oC)
samp. 11	high-Ti	Wrangellia	49.25	1.38	14.99		10.4648	0.18	7.84	13.26	2.13	0.17		0.13	1549	1424
samp. 5727A2	low-Ti	Wrangellia	50.7	0.54	14.49		10.0868	0.19	9.41	12.3	1.09	0.06		0.04	1530	1400
samp. 5727A7	low-Ti	Wrangellia	46.13	0.56	17.97		10.6536	0.17	9.09	12.78	1.19	0.1		0.07	1543	1415
samp. 5731A4	low-Ti	Wrangellia	48.61	0.48	15.89		9.28594	0.19	9.63	12	1.87	0.63		0.06	1485	1380
samp. 5802A2	low-Ti	Wrangellia	49.94	0.48	15.33		9.39391	0.19	8.85	12.67	1.88	0.11		0.06	1493	1381
samp. 5802A3	low-Ti	Wrangellia	47.76	0.52	16.76		9.37592	0.18	9.85	12.31	1.2	0.59		0.06	1490	1377
samp. 5802A5	low-Ti	Wrangellia	46.68	0.93	16.19		10.9866	0.2	10.21	12.16	1.23	0.12		0.1	1546	1418
samp. 5808A2	high-Ti	Wrangellia	46.44	1.06	10.72		9.64586	0.15	15.42	9.59	1.34	0.35		0.09	1485	1377
samp. 5810A2	low-Ti	Wrangellia	48.39	0.54	16.2		10.1857	0.2	9.96	12.21	1.22	0.07		0.06	1534	1406
samp. 4720A2	high-Ti	Wrangellia	49.24	1.58	13.54		10.1677	0.21	6.09	14	2.12	0.1		0.12	1602	1460
samp. 4721A2	high-Ti	Wrangellia	49.56	1.77	13.92		11.7604	0.17	6.06	12.15	2.01	0.09		0.16	1672	1506
samp. 5614A1	low-Ti	Wrangellia	46.24	0.47	14.57		7.71129	0.15	12.11	10.81	1.3	0.01		0.04	1395	1300
samp. 93G171	low-Ti	Wrangellia	47.93	0.46	14.02		8.93501	0.19	15.84	10.42	1.02	0.11		0.08	1440	1335
samp. 5616A7	low-Ti	Wrangellia	46.75	0.73	15.92		9.78982	0.15	8.7	11.69	2.12	0.07		0.04	1493	1387
samp. 92-205B	low-Ti	Wrangellia	48	0.91	15		10.4827	0.21	9.48	12.83	0.78	1.4		0.15	1548	1421
5617A5(2)	high-Ti	Wrangellia	47.4	1.71	13.33		11.4365	0.17	7.46	11.93	1.8	0.17		0.14	1637	1483
28-Dostal	high-Ti	Wrangellia	49.52	1.62	14.32		11.5788	0.21	6.08	12.23	1.8	0.16		0.12	1674	1506
15-Dostal	high-Ti	Wrangellia	49.57	1.51	14.48		11.82	0.2	7.25	12.28	2.1	0.18		0.11	1641	1488
samp. FL-14	low-Ti	Galapagos	47.27	1.3	15.7		9.33124	0.18	8.58	12.17	2.79	0.94		0.23	1439	1359
samp. FL-25	low-Ti	Galapagos	46.5	1.52	15.55		10.0594	0.19	9.98	12.31	2.46	0.26		0.15	1459	1367
samp. FL-26	low-Ti	Galapagos	46.48	1.46	15.73		10.1415	0.18	10.16	12.25	2.3	0.18		0.13	1470	1373
samp. E-165	low-Ti	Galapagos	48.87	0.69	17.72		7.31453	0.12	8.73	12.21	2.74	0.17		0.14	1346	1275
samp. JH-86	low-Ti	Galapagos	46.46	1.26	16		10.0244	0.18	10.79	11.97	2.28	0.06		0.1	1467	1370
samp. JL-74	low-Ti	Galapagos	46.8	1.84	16.22		10.4256	0.19	8.18	12.47	2.36	0.07		0.11	1503	1396
samp. JL-122	low-Ti	Galapagos	47.06	1.37	16.71		10.0045	0.18	9.5	12.52	2.45	0.03		0.07	1465	1368
samp. JH-86	low-Ti	Galapagos	46.46	1.26	16		10.0244	0.18	10.79	11.97	2.28	0.06		0.1	1467	1370
samp. W95 62	low-Ti	Galapagos	48.61	1.61	17.23		7.79	0.13	9.5	12.74	2.16	0.25		0.19	1330	1256
samp. W95 78	high-Ti	Galapagos	48.19	2.16	17.7		8.67	0.14	7.05	12.44	2.67	0.37		0.25	1397	1320
samp. NSK97-220	high-Ti	Galapagos	48.88	2.47	16.15		9.62	0.164	7.17	12.68	2.32	0.31		0.244	1463	1366
samp. NSK97-252	low-Ti	Galapagos	47.3	1.01	16.77		8.83	0.165	11.17	12.37	2.16	0.12		0.104	1401	1315
samp. NSK97-254	low-Ti	Galapagos	47.44	0.98	16.4		9.04	0.17	11.8	11.55	2.31	0.19		0.112	1418	1332
samp. SG93-1	high-Ti	Galapagos	47.97	2.28	15.47		10.35	0.174	7.83	12.67	2.59	0.41		0.256	1488	1390
samp. SG93-5	high-Ti	Galapagos	48.09	2.04	14.79		9.96	0.175	10.2	11.75	2.45	0.34		0.21	1460	1368
samp. 07DSG74	low-Ti	Galapagos	46.691	1.24846	16.7979		9.79369	0.17318	9.54353	12.1964	2.29879	0.07432		0.09491	1466	1369
samp. PJT01	low-Ti	Galapagos	47.0279	1.29981	17.055		9.89948	0.16965	8.96452	12.0691	2.44353	0.117		0.12331	1478	1379
samp. PJT02	low-Ti	Galapagos	46.2338	1.29235	16.8876		9.82129	0.16965	9.26909	12.2911	2.39706	0.10301		0.16622	1461	1366
samp. 07DSG79B	low-Ti	Galapagos	46.6743	1.40877	16.5993		9.82224	0.17082	9.02378	12.3056	2.34484	0.07231		0.09612	1470	1372
samp. 07DSG71	low-Ti	Galapagos	45.9062	1.39436	16.7672		10.0178	0.16743	9.11898	12.6104	2.29371	0.06271		0.0998	1466	1369
samp. 07DSG73	low-Ti	Galapagos	46.8334	1.41889	17.1231		10.0801	0.17166	9.20118	12.3723	2.32742	0.06943		0.11846	1473	1375
samp. 07DSG74	low-Ti	Galapagos	46.691	1.24846	16.7979		9.79369	0.17318	9.54353	12.1964	2.29879	0.07432		0.09491	1466	1368
samp. PJT02	low-Ti	Galapagos	46.2338	1.29235	16.8876		9.82129	0.16965	9.26909	12.2911	2.39706	0.10301		0.16622	1461	1366
samp. 08DSG02	low-Ti	Galapagos	47.7324	1.22946	16.8892		9.72259	0.16833	9.17942	12.2013	2.36774	0.07853		0.09126	1473	1373
samp. 08DSG19	low-Ti	Galapagos	47.0271	1.51411	16.9571		10.1257	0.16477	9.344	11.8989	2.41649	0.12586		0.13094	1480	1381
samp. 08DSG38	low-Ti	Galapagos	46.7824	1.26476	16.7165		10.2266	0.17274	9.66687	12.0692	2.37804	0.08546		0.09876	1484	1384
samp. 08DSG42	low-Ti	Galapagos	47.0015	1.13604	16.6923		10.0354	0.1733	10.3667	11.6162	2.25739	0.07235		0.0872	1483	1381
samp. 08DSG43	low-Ti	Galapagos	46.7165	1.23734	16.8904		10.2228	0.17252	9.89623	11.9827	2.26568	0.0739		0.09003	1485	1383
samp. 15-146-1	low-Ti	Caribbean	48.06	1.07	14.53		9.9068	0.17	8.14	13.01	1.87	0.03		0.083	1530	1408
samp. 96VD126*	low-Ti	Caribbean	46.5	1.5	10.79		11.7964	0.18	11.25	12.2	2.09	0.1		0.15	1587	1455
samp. GOR501	low-Ti	Caribbean	44.65	0.61	10.11		11.3	0.19	22.08	8.91	0.81	0.02		0.03	1596	1452
samp. GOR502	low-Ti	Caribbean	46.07	0.74	13.08		11.37	0.2	14.53	11.38	1.26	0.04		0.04	1566	1432
samp. GOR519	low-Ti	Caribbean	46.9	0.48	12.6		10.57	0.19	15.58	10.62	1.25	0.59		0.03	1549	1423
samp. GOR520	low-Ti	Caribbean	48.22	0.55	14.84		10.69	0.19	9.51	13.01	1.69	0.04		0.04	1568	1434
samp. GOR512	low-Ti	Caribbean	45.27	0.3	9.76		10	0.18	24.44	8.21	0.66	0.07		0.02	1571	1430
samp. GOR513	low-Ti	Caribbean	45.36	0.33	9.98		10.08	0.18	23.54	8.68	0.66	0.05		0.01	1571	1429
samp. GOR515	low-Ti	Caribbean	44.46	0.27	8.71		9.84	0.17	27.29	7.73	0.37	0.02		0.02	1601	1447
samp. GOR517	low-Ti	Caribbean	44.58	0.32	8.5		9.84	0.18	27.87	7.24	0.33	0.03		0.02	1601	1447
samp. CBU6	low-Ti	Caribbean	48.57	1.25	14.77		10.3837	0.153	8.29	12.84	2.31	0.17		0.088	1540	1420
samp. CBU8	low-Ti	Caribbean	47.9	1.16	15.12		10.1227	0.19	8.71	13.13	2.11	0.29		0.092	1510	1398
samp. AMA3	low-Ti	Caribbean	50.22	0.88	13.79		9.51089	0.175	10.3	12.23	1.45	0.08		0.078	1478	1366
samp. AMA4	low-Ti	Caribbean	49.91	0.92	14.36		9.64586	0.171	9.06	12.75	1.62	0.3		0.081	1492	1379
samp. AMA6	low-Ti	Caribbean	50.1	0.99	14.37		9.60087	0.177	9.02	12.05	2.15	0.32		0.085	1486	1381
samp. AMA9	low-Ti	Caribbean	50.24	0.99	14.36		9.53788	0.18	8.78	12.85	1.81	0.04		0.087	1485	1374
samp. FLO1	low-Ti	Caribbean	50.43	0.99	14.21		9.4389	0.173	8.43	12.11	2.71	0.2		0.086	1480	1381
samp. YAN4	low-Ti	Caribbean	50.86	0.87	14.22		9.48389	0.179	8.57	13.22	1.39	0.03		0.066	1491	1374
samp. AN53	low-Ti	Caribbean	48.46	0.99	14.22		10.1677	0.23	8.63	12.61	1.96	0.05		0.08	1539	1416
samp. AN54	low-Ti	Caribbean	48.92	0.98	14.26		9.95179	0.22	8.58	12.63	1.94	0.07		0.08	1524	1405
samp. AN75	low-Ti	Caribbean	48.93	0.91	13.99		9.64586	0.19	8.83	12.09	2.1	0.21		0.08	1507	1395
samp. AN76	low-Ti	Caribbean	48.72	0.75	14.38		9.15097	0.16	8.66	12.19	1.87	0.34		0.05	1485	1377
samp. AN87	low-Ti	Caribbean	48.96	0.76	14.28		9.10598	0.16	8.69	12.24	1.94	0.34		0.05	1480	1374
samp. BN14	low-Ti	Caribbean	47.84	0.83	14.21		9.61886	0.17	8.11	12.22	2.37	0.46		0.06	1530	1416
samp. BN19	low-Ti	Caribbean	50.16	0.88	14.73		8.5661	0.17	8.6	12.75	1.86	0.16		0.07	1436	1338
samp. BUR5	low-Ti	Caribbean	48.93	0.85	14.49		9.15097	0.16	8.77	12.61	1.93	0.11		0.06	1477	1370
samp. BUR11	low-Ti	Caribbean	47.97	1.13	14.43		9.81682	0.2	8.4	12.05	2.81	0.1		0.09	1506	1402
samp. BN10	low-Ti	Caribbean	49.14	0.85	14.25		8.90802	0.15	8.16	12.26	1.62	0.61		0.05	1472	1367
samp. GOR-94-19	low-Ti	Caribbean	45.79	0.63	10.74		10.9686	0.18	20.86	9.1	0.89	0.03		0.05	1593	1447
samp. GOR-94-32	low-Ti	Caribbean	46.72	0.35	10.59		10.1317	0.17	22.43	8.65	0.56	0.07		0.03	1556	1426
samp. GOR-156	low-Ti	Caribbean	45.7	0.44	9.8		11.1		23.9	8.4	0.6	0.01			1621	1464
samp. GOR-139	low-Ti	Caribbean	45.1	0.46	10.2		11.1		22.9	8.7	0.73	0.02			1601	1453
samp. GOR-142	low-Ti	Caribbean	46	0.52	10.5		10.9		22.3	8.9	0.71	0.02			1596	1447
samp. GOR-145	low-Ti	Caribbean	46	0.53	11.1		11.3		20.6	9.3	0.84	0.03			1601	1453
samp. GOR-166	low-Ti	Caribbean	46.3	0.53	11.3		11.5		19.5	9.8	0.81	0			1608	1457
samp. GOR-141	low-Ti	Caribbean	46	0.55	11.8		11.5		18.4	10.1	0.89	0			1599	1450
samp. GOR-149	low-Ti	Caribbean	46.5	0.58	12.1		11.3		18	10.3	1.07	0.08			1579	1439
samp. GOR-148	low-Ti	Caribbean	46.9	0.62	12.4		11.5		17.6	10.2	0.95	0.08			1598	1450
samp. GOR-146	low-Ti	Caribbean	46.6	0.61	12.4		11.5		17.1	10.5	1.06	0.07			1588	1445
samp. GOR-157	low-Ti	Caribbean	46.9	0.59	12.8		11.5		15.7	10.9	1.1	0.1			1591	1447
samp. GOR-167	low-Ti	Caribbean	46.9	0.67	13.9		11.5		13.2	12	1.16	0.03			1580	1439
samp. GOR-94-32	low-Ti	Caribbean	45.65	0.67	12.4		11.1305	0.19	16.49	10.77	1.23	0.025		0.052	1556	1426
samp. GOR-94-19	low-Ti	Caribbean	45.79	0.63	10.74		10.9686	0.18	20.86	9.1	0.89	0.033		0.047	1593	1447
samp. 6	low-Ti	Caribbean	46.9	0.72	12.7		11.3	0.2	15.8	10.9	1.13	0.05			1578	1438
samp. 23B	low-Ti	Caribbean	44.7	0.67	12		12.5	0.19	18	9.97	0.92	0.03			1615	1467
samp. 38	low-Ti	Caribbean	46.3	0.64	13.2		11.3	0.21	15.8	10.8	1.43	0.02			1557	1429
samp. 71	low-Ti	Caribbean	46.5	0.67	12.3		11.3	0.18	17.1	10.5	1.33	0.02			1566	1433
samp. 72	low-Ti	Caribbean	46	0.71	12.6		11.4	0.21	16.2	10.8	1.19	0.02			1569	1434
samp. 73	low-Ti	Caribbean	46.3	0.71	13		11.3	0.21	15.5	10.9	1.26	0.03			1567	1433
samp. 3P	low-Ti	Caribbean	45.3	0.6	10.6		10.9	0.18	21.9	9.25	1.04	0.02			1559	1428
samp. 5P	low-Ti	Caribbean	46	0.59	12		11	0.16	18.4	10.3	1.11	0.02			1557	1425
samp. 72	low-Ti	Caribbean	46	0.71	12.59		11.4	0.21	16.16	10.83	1.19	0.02			1569	1434
samp. 73	low-Ti	Caribbean	46.33	0.71	12.98		11.33	0.21	15.54	10.93	1.26	0.03			1567	1433
samp. G-160	low-Ti	Caribbean	45.55	0.65	11.89		11.38	0.18	18.42	10.19	1.31	0.06		0.05	1557	1429
samp. G-159	low-Ti	Caribbean	45.22	0.64	11.68		11.33	0.18	19.09	10	1.22	0.03		0.04	1557	1429
samp. G-142	low-Ti	Caribbean	44.84	0.58	10.46		11.01	0.18	22.43	8.96	0.95	0.02		0.04	1569	1435
samp. G-156	low-Ti	Caribbean	44.91	0.54	9.83		11.01	0.18	23.98	8.46	0.86	0.01		0.04	1585	1445
samp. GTJ422	low-Ti	Caribbean	50.5	1.08	14.4		9.21395	0.17	8.5	12.98	1.65	0.18		0.09	1469	1361
samp. NC93-20	low-Ti	Caribbean	50.6	0.98	14.34		9.65	0.19	8.73	12.54	1.82	0.06		0.07	1496	1383
samp. COL547	low-Ti	Caribbean	46.73	1.22	12		12.2013	0.21	9.53	12.38	2.14	0.46		0.16	1607	1472
samp. 15-146-42-1-30	low-Ti	Caribbean	50.6	0.98	15.8		9.42	0.2	8.78	12.8	2.37	0.09			1471	1369
samp. GOR29	low-Ti	Caribbean	43.91	0.483	8.86		10.4467	0.17	26.1	7.91	0.84	0.01		0.042	1569	1436
samp. A12SP2	low-Ti	Caribbean	49.8	0.41	14.8		8.8	0.13	9.9	12.6	2.05	0.048			1450	1350
samp. B01SP3	low-Ti	Caribbean	48.4	0.6	14.9		9.6	0.2	10.2	12.5	1.8	0.027			1497	1383
samp. D29SP2	low-Ti	Caribbean	50.5	0.43	15.5		8.7	0.17	8.6	13	1.68	0.009			1456	1349
samp. A02SP4R	low-Ti	Caribbean	52.6	0.94	14.6		7.7	0.13	8.8	12.8	1.8	0.118			1371	1283
samp. A02SP4S	low-Ti	Caribbean	52.3	1	14.4		7.7	0.1	8.9	12.6	1.89	0.112			1370	1284
samp. D18SP2	low-Ti	Caribbean	47.8	0.77	14.1		10.2	0.21	10.9	12.3	1.33	0.158			1528	1402
samp. A08SP3	low-Ti	Caribbean	50.1	0.7	14.9		9.1	0.16	9.6	12.4	1.99	0.039			1462	1358
samp. D33SP1	low-Ti	Caribbean	49	0.6	14.8		9.1	0.16	10	12.3	1.9	0.028			1467	1362
